# Supplementary material for: Tandem mass tag-based quantitative proteomic analysis of lycorine treatment in highly pathogenic avian influenza H5N1 virus infection
Source: PeerJ. 2019 Oct 2;7:e7697. doi: 10.7717/peerj.7697 (PMC6778435; doi:10.7717/peerj.7697)
Supplement: Table S1 — 5786 proteins were identified and relatively quantified at 0.01% FDR in the proteome using MaxQuant. [file peerj-07-7697-s005.xls]

## Sheet: table S1
Supplementary material tables S1: 5786 proteins were identified and relatively quantified at 0.01% FDR in the proteome using MaxQuant.
Accession	Description	Coverage	Peptides	Unique Peptides	AAs	MW [kDa]	calc. pI	M1-126	M2-127N	M3-127C	Average M	V1-128N	V2-128C	V3-129N	Average V	L1-129C	L2-130N	L3-130C	Average L	Ratio V/M	P Value V/M	Ratio L/V	P Value L/V	Ratio L/M	P Value L/M
F1Q0N9	Uncharacterized protein	91.7293	38	23	399	43.9	5.26	0.998	1.025	0.897	0.973333	0.942	0.987	1.017	0.982	1.105	1.028	1	1.04433	1.0089	0.855513	1.06348	0.178206	1.07295	0.228852
Q6JDK6	Heterogenous nuclear ribonucleoprotein K (Fragment)	90.9091	1	1	11	1.3	8.84	1.021	0.948	0.96	0.976333	1.038	1.032	0.844	0.971333	1.11	0.947	1.1	1.05233	0.994879	0.944574	1.08339	0.382794	1.07784	0.255968
A7XZY9	Keratin 19 (Fragment)	89.4737	5	1	76	8.6	4.61	1.019	1.063	1.122	1.068	0.968	1.134	0.935	1.01233	1.005	0.894	0.861	0.92	0.947878	0.461551	0.908792	0.28804	0.861423	0.0486484
F1P6P2	Transgelin	88.4422	15	14	199	22.4	8.25	1.022	1.015	1.031	1.02267	0.945	1.036	0.994	0.991667	0.983	0.986	0.989	0.986	0.969687	0.310188	0.994286	0.840259	0.964146	0.00176415
E2QS94	Uncharacterized protein	86.1314	8	8	137	14.3	8.1	0.962	0.93	0.972	0.954667	0.987	0.981	1.062	1.01	1.071	1.017	1.018	1.03533	1.05796	0.128774	1.02508	0.467354	1.0845	0.0210655
Q50KA9	Nucleoside diphosphate kinase A	85.5263	11	1	152	17.2	6.01	0.985	0.965	0.962	0.970667	1.056	1.036	1.015	1.03567	0.987	0.989	1.005	0.993667	1.06696	0.00938988	0.959446	0.0329853	1.0237	0.0666776
Q9TT99	Copper transport protein ATOX1	85.2941	5	5	68	7.4	5.83	1.023	0.961	1.001	0.995	1.015	0.965	1.064	1.01467	1.044	0.969	0.959	0.990667	1.01977	0.592452	0.976347	0.573419	0.995645	0.900017
A8W340	Prohibitin	84.9265	18	14	272	29.8	5.76	0.935	0.986	0.926	0.949	1.03	1.062	1.029	1.04033	1.006	1.016	1.011	1.011	1.09624	0.0133816	0.971804	0.059076	1.06533	0.0305048
F1PFF2	Protein S100	82.6531	6	6	98	11.1	6.52	1.011	0.868	1.06	0.979667	0.864	0.884	1.025	0.924333	1.068	1.221	0.998	1.09567	0.943518	0.510609	1.18536	0.108173	1.11841	0.255489
Q9TTK3	Glyceraldehyde-3-phosphate dehydrogenase (Fragment)	82.1429	4	1	84	9.2	4.92	1.041	0.945	0.999	0.995	1.07	0.998	0.982	1.01667	0.847	1.005	1.112	0.988	1.02178	0.606224	0.971803	0.743049	0.992965	0.935941
F1PW98	Uncharacterized protein	81.7444	42	28	493	55	5.81	0.97	1.003	0.971	0.981333	0.959	0.979	1.016	0.984667	1.083	1.011	1.008	1.034	1.0034	0.875134	1.0501	0.171599	1.05367	0.120875
E2QSF4	Tubulin beta chain	81.3063	24	5	444	49.6	4.89	1.031	1.014	1.065	1.03667	0.961	0.986	0.963	0.97	1.016	0.96	1.006	0.994	0.935691	0.0172358	1.02474	0.275522	0.958842	0.135258
F1PIS7	Transcription factor BTF3	81.295	8	6	139	15.1	5.9	1.074	1.073	1.013	1.05333	0.843	1.012	0.992	0.949	1.002	0.996	0.995	0.997667	0.900949	0.141166	1.05128	0.413328	0.947152	0.0516934
L7N0I7	Tubulin beta chain	81.1236	23	1	445	49.8	4.89	0.907	1.015	1.077	0.999667	0.955	1.181	0.923	1.01967	0.981	0.981	0.978	0.98	1.02001	0.84384	0.961098	0.650763	0.980327	0.712411
E2RFJ7	Tubulin beta chain	80.8989	22	1	445	49.9	4.89	0.944	0.986	1.163	1.031	1.045	1.176	0.891	1.03733	0.932	0.901	0.964	0.932333	1.00614	0.955322	0.898779	0.28113	0.9043	0.228861
E2RHH8	Uncharacterized protein	80.7453	14	7	161	18.6	5.77	0.889	0.947	0.947	0.927667	0.993	0.997	1.061	1.017	1.076	1.038	1.052	1.05533	1.0963	0.0381095	1.03769	0.195139	1.13762	0.00460122
E2RH47	40S ribosomal protein S3	80.6584	20	20	243	26.7	9.66	0.966	0.956	0.943	0.955	0.987	1.015	0.975	0.992333	1.005	1.135	1.019	1.053	1.03909	0.0515622	1.06114	0.229944	1.10262	0.078666
F1PLS4	Uncharacterized protein	80.4721	39	34	466	53.6	5.12	0.965	1.004	1.004	0.991	1.011	1.036	1.013	1.02	0.974	0.989	1.003	0.988667	1.02926	0.130465	0.969281	0.0539651	0.997645	0.887362
J9NWJ5	Thioredoxin	80.198	7	7	101	11.4	5.21	0.993	0.923	1.007	0.974333	0.997	0.97	1.062	1.00967	1.004	1.048	0.996	1.016	1.03626	0.401594	1.00627	0.851528	1.04276	0.244972
F6V0D8	Uncharacterized protein	78.3178	30	30	535	57.4	6.46	1.005	0.971	1.055	1.01033	1.015	1	0.972	0.995667	0.983	1.001	0.998	0.994	0.985483	0.621532	0.998326	0.909538	0.983834	0.54953
F1PXG4	Annexin	78.0564	24	23	319	35.9	5.88	0.972	1.01	0.998	0.993333	0.96	0.982	1.021	0.987667	1.05	1.001	1.006	1.019	0.994295	0.801262	1.03172	0.256231	1.02584	0.251966
E2RFV2	Tubulin beta chain	77.7027	21	1	444	49.6	4.88	0.917	0.959	1.063	0.979667	0.924	1.093	0.925	0.980667	1.043	1.012	1.063	1.03933	1.00102	0.989434	1.05982	0.369688	1.06091	0.26313
E2REU6	Uncharacterized protein	77.6286	32	29	447	49.8	5.53	1.022	0.993	0.988	1.001	0.994	0.984	0.999	0.992333	1.023	0.998	1	1.007	0.991342	0.492281	1.01478	0.18433	1.00599	0.675084
Q6TEQ7	Annexin A2	77.5811	28	28	339	38.6	7.31	0.962	0.964	0.987	0.971	1.065	1.036	1.012	1.03767	0.961	1.006	1.007	0.991333	1.06866	0.0182291	0.955349	0.0981011	1.02094	0.301621
F1PYX5	Uncharacterized protein	77.1242	10	10	153	17.2	5.3	0.931	0.935	0.902	0.922667	1.053	1.152	1.017	1.074	1.015	0.983	1.011	1.003	1.16402	0.0221412	0.933892	0.163043	1.08707	0.00515385
E2R0T6	Uncharacterized protein	76.7802	43	28	646	70.9	5.52	1.028	0.971	1.01	1.003	0.952	1.019	0.955	0.975333	0.996	1.036	1.033	1.02167	0.972416	0.372494	1.04751	0.14166	1.01861	0.427841
F1PZS5	Uncharacterized protein	76.6355	6	6	107	11.5	4.92	0.931	0.951	0.902	0.928	1.005	1.004	1.023	1.01067	1.041	1.105	1.037	1.061	1.08908	0.00596054	1.0498	0.0926539	1.14332	0.00712141
J9P9V0	Uncharacterized protein	76.6129	12	10	124	14.4	5.12	0.955	0.968	1.07	0.997667	0.999	0.995	1.01	1.00133	1.004	1.008	0.991	1.001	1.00368	0.925094	0.999667	0.963335	1.00334	0.932036
E2RHG2	Uncharacterized protein	76.3819	14	11	199	22.1	8.13	0.996	0.986	0.973	0.985	1.008	0.99	0.998	0.998667	1.056	0.977	1.017	1.01667	1.01387	0.181211	1.01802	0.484535	1.03215	0.253423
F1PDB4	ATP synthase subunit beta	76.0911	25	24	527	56.3	5.34	0.907	0.979	1.004	0.963333	0.997	1.098	0.993	1.02933	1.017	0.994	1.011	1.00733	1.06851	0.216409	0.978627	0.564125	1.04567	0.214872
Q3YIX4	Phosphatidylethanolamine-binding protein 1	75.9358	11	11	187	20.9	7.49	1.069	0.981	0.96	1.00333	0.934	0.942	1.008	0.961333	1.075	1.017	1.014	1.03533	0.95814	0.361448	1.07698	0.0736635	1.03189	0.456337
E2RN91	V-type proton ATPase subunit F	75.6303	7	7	119	13.4	5.82	1.039	1.092	1.05	1.06033	1.037	1.03	1.039	1.03533	0.932	0.878	0.905	0.905	0.976423	0.201593	0.874115	0.0011853	0.853505	0.00228778
E2R0K4	Uncharacterized protein	74.8837	12	11	215	23.9	6.21	0.966	0.947	0.991	0.968	1.01	0.993	0.964	0.989	1.045	1.043	1.042	1.04333	1.02169	0.319982	1.05494	0.0156385	1.07782	0.00413258
E2QW69	Uncharacterized protein	74.8837	11	7	215	23.7	8.13	0.959	0.973	0.999	0.977	1.016	1.071	0.989	1.02533	0.984	1.03	0.979	0.997667	1.04947	0.145903	0.973017	0.395254	1.02115	0.360244
F1PTZ9	Glyceraldehyde-3-phosphate dehydrogenase	74.8485	19	1	330	35.5	7.87	1.055	0.929	1.089	1.02433	1.018	0.963	0.974	0.985	0.988	1.01	0.975	0.991	0.961601	0.487464	1.00609	0.775487	0.967459	0.539364
E2QUS9	Uncharacterized protein	74.5098	8	8	102	10.9	8.92	0.918	0.913	0.969	0.933333	1.089	1.046	1.038	1.05767	0.983	1.034	1.01	1.009	1.13321	0.00649965	0.953987	0.0876304	1.08107	0.0309369
E2RQ81	Uncharacterized protein	74.4526	36	1	548	59.7	5.68	0.957	1.052	0.953	0.987333	1.084	1.056	1.015	1.05167	0.979	0.934	0.97	0.961	1.06516	0.166193	0.913788	0.0202742	0.973329	0.495449
F1PBL1	Uncharacterized protein	74.2857	19	10	245	27.7	4.79	0.97	1.003	1.028	1.00033	0.979	0.962	1.035	0.992	1.014	1.037	0.973	1.008	0.991669	0.778684	1.01613	0.609619	1.00766	0.775679
F1PQ93	Uncharacterized protein	73.7903	20	16	248	27.8	4.75	1.025	0.959	1.042	1.00867	0.942	0.944	0.998	0.961333	1.012	1.042	1.035	1.02967	0.953073	0.204551	1.07108	0.0288338	1.02082	0.47841
F1PC59	Uncharacterized protein	73.7557	16	16	221	24.7	6.01	1.017	0.945	0.995	0.985667	1.06	0.951	1.019	1.01	0.993	1.009	1.011	1.00433	1.02469	0.559383	0.994389	0.869226	1.01894	0.444924
E2RC20	Nucleoside diphosphate kinase	73.6301	16	8	292	32.7	8.87	0.951	0.983	0.969	0.967667	1.035	1.069	1.023	1.04233	1.006	0.982	0.982	0.99	1.07716	0.0108389	0.949792	0.0303542	1.02308	0.142073
J9P969	Uncharacterized protein	73.5401	203	203	4966	533.6	5.9	0.969	0.992	1.129	1.03	0.996	0.972	0.965	0.977667	0.971	1.019	0.988	0.992667	0.949191	0.361287	1.01534	0.424877	0.963754	0.511586
F1Q3Y0	Profilin	73.4694	6	6	98	10.6	9.25	1.132	0.998	0.978	1.036	0.915	0.916	1.077	0.969333	1.03	1.019	0.935	0.994667	0.93565	0.409001	1.02613	0.702099	0.960103	0.5078
F1PKW7	Uncharacterized protein	73.3607	16	9	244	27.8	4.83	0.938	0.958	1.165	1.02033	0.969	0.969	1.018	0.985333	0.988	1.016	0.979	0.994333	0.965697	0.662465	1.00913	0.672569	0.974518	0.741101
E2RRC9	Phosphoglycerate kinase	73.1415	27	27	417	44.4	7.87	1	0.958	1.075	1.011	0.997	0.9	0.992	0.963	1.054	1.007	1.018	1.02633	0.952522	0.36058	1.06577	0.140982	1.01517	0.700182
J9P2P6	Uncharacterized protein	72.8745	11	11	247	27.6	5.44	0.926	0.953	0.991	0.956667	0.985	1.135	0.974	1.03133	0.979	1.071	0.986	1.012	1.07805	0.247909	0.981254	0.762507	1.05784	0.189732
F1P797	Uncharacterized protein	72.6351	33	33	592	64.7	6.67	0.97	1.012	0.985	0.989	0.964	1.029	0.985	0.992667	1.033	0.995	1.027	1.01833	1.00371	0.879795	1.02586	0.317488	1.02966	0.16014
A0A0A0MPD0	Triosephosphate isomerase	72.5753	18	18	299	31.7	7.99	1.008	0.993	0.957	0.986	0.994	0.982	1.018	0.998	1.07	0.978	1	1.016	1.01217	0.55123	1.01804	0.577028	1.03043	0.396144
F1PQ68	Tubulin beta chain	72.1348	21	1	445	49.9	4.89	1.061	1.044	1.011	1.03867	0.939	1.032	0.984	0.985	0.975	0.971	0.983	0.976333	0.948331	0.154342	0.991201	0.764976	0.939987	0.0145041
E2RM61	Uncharacterized protein	72.1116	15	14	251	28	6.18	1.072	0.94	1.05	1.02067	0.988	0.905	0.989	0.960667	1.008	1.021	1.028	1.019	0.941215	0.291454	1.06072	0.109597	0.998367	0.969706
E2QUU5	60 kDa heat shock protein, mitochondrial	72.0768	32	19	573	61	6	0.907	0.946	1.028	0.960333	1.01	1.061	0.988	1.01967	0.974	1.055	1.032	1.02033	1.06178	0.227858	1.00065	0.984558	1.06248	0.23573
E2QS13	Uncharacterized protein	71.9577	10	10	189	19.9	6.34	1.004	0.953	1.024	0.993667	1.05	0.92	1.044	1.00467	1.018	0.987	0.999	1.00133	1.01107	0.827692	0.996682	0.94236	1.00772	0.755451
P51147	Ras-related protein Rab-5C	71.7593	10	7	216	23.4	8.41	0.916	0.959	1.13	1.00167	1.038	0.907	0.99	0.978333	1	1.028	1.032	1.02	0.976705	0.773385	1.04259	0.351704	1.0183	0.795331
E2REC1	Uncharacterized protein	71.5762	22	22	387	43.4	5.81	1.015	0.968	1.001	0.994667	0.988	0.923	1.017	0.976	1.051	1.021	1.016	1.02933	0.981233	0.580568	1.05464	0.148649	1.03485	0.12187
J9NVT2	Hypoxanthine-guanine phosphoribosyltransferase	71.5596	11	11	218	24.4	6.43	1.002	1.005	0.997	1.00133	0.953	1.029	1.031	1.00433	1.023	0.985	0.974	0.994	1.003	0.912965	0.989711	0.745071	0.992676	0.651062
P18067	Ras-related protein Rab-7a	71.4976	13	13	207	23.5	6.7	0.947	0.984	0.945	0.958667	1.025	1.104	1.011	1.04667	0.987	1.013	0.983	0.994333	1.09179	0.0495974	0.95	0.160688	1.0372	0.08675
E2RBU1	Uncharacterized protein	71.4286	19	19	350	38.5	5.12	0.955	0.974	0.944	0.957667	1.082	1.057	1.073	1.07067	0.978	0.967	0.971	0.972	1.118	0.000583771	0.907846	0.000246646	1.01497	0.199409
E2RGQ5	Uncharacterized protein	70.9091	14	13	165	18.9	10.15	0.969	0.954	1.026	0.983	1.01	0.932	1.009	0.983667	1.017	1.037	1.046	1.03333	1.00068	0.985247	1.05049	0.142101	1.0512	0.0993552
E2QYC2	Tubulin beta chain	70.852	20	7	446	49.8	4.88	0.927	0.992	1.058	0.992333	1.004	1.087	0.944	1.01167	0.972	0.998	1.016	0.995333	1.01948	0.747799	0.983855	0.725657	1.00302	0.943697
F1PLR0	Uncharacterized protein	70.6625	19	19	317	35.1	7.69	0.962	0.94	0.98	0.960667	0.932	0.958	0.969	0.953	1.079	1.075	1.104	1.086	0.992019	0.65568	1.13956	0.000730878	1.13046	0.00103853
F1PHS5	Uncharacterized protein	70.582	317	313	4691	533.3	5.94	0.947	0.986	0.977	0.97	1.019	1.004	1.007	1.01	1.02	1.011	1.028	1.01967	1.04124	0.0341094	1.00957	0.223486	1.0512	0.0177076
E2RQ14	Annexin	70.405	19	19	321	35.9	5.08	0.909	0.971	0.953	0.944333	1.018	0.98	1.01	1.00267	1.085	1.073	1.001	1.053	1.06177	0.0550862	1.0502	0.153967	1.11507	0.0275126
E2RB81	Uncharacterized protein	70.3704	36	35	540	59.5	5.82	1.016	0.971	1.069	1.01867	1.022	0.997	0.983	1.00067	0.97	0.991	0.982	0.981	0.98233	0.587189	0.980346	0.202821	0.963024	0.263355
F1PC72	Uncharacterized protein	70.2703	16	15	296	32.2	8.73	0.917	0.965	0.926	0.936	0.998	1.043	1.036	1.02567	1.067	1.013	1.034	1.038	1.0958	0.011554	1.01202	0.589138	1.10897	0.00906902
E2QY07	Uncharacterized protein	70.0673	53	31	892	102.9	5.41	0.904	0.924	0.961	0.929667	1.033	1.071	1.017	1.04033	0.982	1.056	1.052	1.03	1.11904	0.0087528	0.990067	0.738532	1.10792	0.0265575
J9P7A6	Uncharacterized protein	70.0389	16	0	257	28.2	7.58	1.247	0.812	1.251	1.10333	0.604	1.057	0.89	0.850333	0.871	1.206	1.06	1.04567	0.770695	0.267889	1.22971	0.299488	0.947734	0.758288
E2QYQ0	Uncharacterized protein	70	11	11	180	19.7	6.57	1.017	0.999	0.968	0.994667	1.033	0.999	1.017	1.01633	1	0.992	0.974	0.988667	1.02178	0.279971	0.972778	0.0907869	0.993968	0.730587
F1PQN5	Uncharacterized protein	69.8795	16	12	166	18.5	8.09	1.001	0.984	0.986	0.990333	0.973	0.982	1.024	0.993	1.034	1.003	1.014	1.017	1.00269	0.880208	1.02417	0.256551	1.02693	0.0646769
F1P895	Uncharacterized protein	69.7044	25	14	406	46.1	5.58	1.032	0.985	1.101	1.03933	0.97	0.95	0.935	0.951667	0.972	1.064	0.99	1.00867	0.915651	0.0673385	1.05989	0.129481	0.970494	0.523312
E2RL17	Uncharacterized protein	69.5238	21	21	315	36.1	5.08	0.94	0.939	0.961	0.946667	0.988	1.18	0.996	1.05467	0.962	1.035	0.999	0.998667	1.11408	0.162236	0.946903	0.44495	1.05493	0.0797339
E2RDZ4	Uncharacterized protein	69.3431	23	20	411	46.8	6.73	1.003	0.901	1.063	0.989	1.035	0.883	1.022	0.98	0.985	1.067	1.04	1.03067	0.9909	0.900865	1.0517	0.403594	1.04213	0.476397
E2R0L9	Uncharacterized protein	69.2446	29	29	556	60.2	5.99	1.032	0.988	1.001	1.007	1.01	0.967	1.001	0.992667	0.975	1.034	0.99	0.999667	0.985766	0.48144	1.00705	0.766472	0.992718	0.75557
F6XRY2	Uncharacterized protein	69.2308	50	48	858	95.3	6.83	1.039	0.985	1.084	1.036	0.98	0.939	0.973	0.964	0.973	1.022	1.006	1.00033	0.930502	0.0828717	1.03769	0.131316	0.965573	0.328123
E2RGN6	Uncharacterized protein	69.2308	20	20	299	33.4	9.85	0.927	0.949	0.94	0.938667	1.046	1.063	1.024	1.04433	1.011	1.024	1.016	1.017	1.11257	0.00123525	0.973827	0.0833453	1.08345	0.000456327
E2RT65	Phosphoglycerate mutase	68.8976	13	13	254	28.8	7.18	1.054	0.974	1.007	1.01167	0.965	1.04	0.979	0.994667	1.023	0.976	0.982	0.993667	0.983196	0.630532	0.998995	0.972589	0.982208	0.548648
J9P5N6	Uncharacterized protein	68.8889	9	5	180	20.5	6.19	0.951	0.929	1.009	0.963	1.005	1.052	1.021	1.026	0.997	1.039	0.998	1.01133	1.06542	0.0842506	0.985705	0.494619	1.05019	0.154594
E2R5T9	Uncharacterized protein	68.8255	54	35	911	104.9	5.44	0.994	1.019	0.979	0.997333	1.026	1.022	0.986	1.01133	0.969	1.013	0.991	0.991	1.01404	0.462785	0.979895	0.321202	0.99365	0.732056
F1PWQ0	Rab GDP dissociation inhibitor	68.6801	22	15	447	50.5	5.14	0.987	0.916	1.051	0.984667	1.001	0.99	0.994	0.995	0.955	1.067	1.039	1.02033	1.01049	0.804724	1.02546	0.495285	1.03622	0.526717
E2QZA1	MICOS complex subunit MIC13	68.6441	5	5	118	13.4	9.04	0.902	0.982	0.957	0.947	1.075	1.039	1.031	1.04833	1.008	0.998	1.007	1.00433	1.107	0.0204485	0.958029	0.0340085	1.06054	0.0739774
F2Z4P3	60S ribosomal protein L23	68.5714	8	8	140	14.9	10.51	0.963	0.936	1.012	0.970333	1.006	0.922	0.981	0.969667	1.046	1.07	1.064	1.06	0.999313	0.985027	1.09316	0.025251	1.09241	0.0185442
F1PVP9	Uncharacterized protein	68.4729	13	5	203	22.3	5.73	1.037	0.99	1.008	1.01167	0.952	0.891	1.005	0.949333	1.062	1.01	1.045	1.039	0.938386	0.155454	1.09445	0.0690338	1.02702	0.254012
E2QVU9	Uncharacterized protein	68.4466	9	9	206	22.1	7.59	0.994	1.038	0.996	1.00933	0.965	1.029	1.015	1.003	1.021	0.955	0.988	0.988	0.993725	0.806063	0.985045	0.610783	0.978864	0.421607
F1Q2N7	Gamma-synuclein	68.3824	9	9	136	14.3	4.74	0.907	0.965	0.952	0.941333	1.001	1.064	1.067	1.044	1.091	0.979	0.973	1.01433	1.10907	0.0209161	0.971584	0.537061	1.07755	0.158743
E2RKT9	Uncharacterized protein	68.1818	7	7	154	17.9	8.51	0.981	0.984	0.975	0.98	1.061	1.061	1.044	1.05533	1.002	0.939	0.952	0.964333	1.07687	0.000272338	0.913771	0.0104576	0.984014	0.464306
F1Q264	Eukaryotic translation initiation factor 5A	68.1818	10	10	154	16.8	5.24	0.949	0.952	1.014	0.971667	1.043	1.066	1.004	1.03767	0.972	1.009	0.991	0.990667	1.06792	0.0769111	0.954706	0.0889482	1.01955	0.468096
E2R0I9	Glucose-6-phosphate 1-dehydrogenase	68.1467	32	32	518	59.6	6.77	1.097	1.085	1.031	1.071	0.981	0.932	0.96	0.957667	0.993	0.955	0.967	0.971667	0.89418	0.0102156	1.01462	0.482165	0.907252	0.0128125
P33724	Caveolin-1	67.9775	11	11	178	20.6	6.02	0.962	0.958	1.103	1.00767	1.033	1.013	1.019	1.02167	0.977	0.983	0.952	0.970667	1.01389	0.785247	0.950082	0.0103582	0.963282	0.489017
F1PRB0	Uncharacterized protein	67.8959	30	17	461	50.9	6.49	0.982	1.041	0.958	0.993667	0.927	1.05	0.997	0.991333	1.046	1.025	0.974	1.015	0.997652	0.95963	1.02387	0.599353	1.02147	0.548994
J9P6N4	Uncharacterized protein	67.8862	16	11	246	28.2	4.89	0.968	0.959	0.992	0.973	0.994	0.975	1.024	0.997667	1.002	1.079	1.007	1.02933	1.02535	0.2278	1.03174	0.331402	1.0579	0.103
F1PVW0	L-lactate dehydrogenase	67.867	20	19	361	39.8	8.6	0.956	0.978	1.073	1.00233	0.982	0.955	1.007	0.981333	1.033	1.032	0.983	1.016	0.979049	0.618067	1.03533	0.195198	1.01363	0.746847
J9NS87	Uncharacterized protein	67.5875	28	28	543	59.4	7.15	1.018	1.011	1.045	1.02467	0.94	1.038	0.98	0.986	0.977	1.001	0.99	0.989333	0.962264	0.270681	1.00338	0.914853	0.965517	0.0472027
J9P4F3	Uncharacterized protein	67.5047	68	68	1074	116.7	6.23	0.993	0.996	0.992	0.993667	0.985	0.993	0.963	0.980333	1.012	1.04	1.025	1.02567	0.986582	0.214638	1.04624	0.0198911	1.0322	0.0173547
J9P2H0	Uncharacterized protein	67.4959	145	2	2452	282.1	5.33	1.055	1.105	1.085	1.08167	1.058	0.964	1.027	1.01633	0.85	0.933	0.923	0.902	0.939599	0.104666	0.887504	0.0398059	0.833898	0.00387282
F1PHR2	Pyruvate kinase	67.4589	33	33	547	59.6	7.85	1.016	0.961	1.049	1.00867	1.026	0.921	1.006	0.984333	1.014	1.016	0.992	1.00733	0.975876	0.586264	1.02337	0.525322	0.998678	0.962697
F1P8L7	Rab GDP dissociation inhibitor	67.4419	23	16	430	48.8	7.56	0.999	0.997	0.998	0.998	1.002	1.013	0.981	0.998667	1.004	1.009	0.997	1.00333	1.00067	0.946889	1.00467	0.665362	1.00534	0.205106
E2R2K4	Uncharacterized protein	67.3913	11	5	184	20.8	5.78	0.985	0.989	0.967	0.980333	1.037	0.988	1.038	1.021	0.964	1.016	1.016	0.998667	1.04148	0.0847795	0.978126	0.40356	1.0187	0.380263
J9P2M0	Uncharacterized protein	67.3611	6	3	144	15.7	5.2	1.179	1.142	1.191	1.17067	0.963	0.848	0.9	0.903667	0.929	0.942	0.905	0.925333	0.771925	0.00183336	1.02398	0.569081	0.790433	0.000179055
F1P6B7	Annexin	67.2464	21	21	345	38.6	6.16	0.995	0.981	1.015	0.997	1.007	1.015	0.996	1.006	1.015	0.995	0.98	0.996667	1.00903	0.470324	0.990722	0.463906	0.999666	0.982329
F1PAZ6	Uncharacterized protein	67.1111	13	13	225	24.3	5.52	0.954	0.968	0.998	0.973333	1.1	1.015	0.994	1.03633	0.993	0.993	0.986	0.990667	1.06473	0.145432	0.955934	0.232559	1.01781	0.258996
F1PAP5	Uncharacterized protein	67.0973	146	3	2477	284.9	5.35	1.079	1.085	1.077	1.08033	1.04	1.013	0.995	1.016	0.879	0.913	0.919	0.903667	0.94045	0.00840845	0.889436	0.00340014	0.83647	0.000154101
F1Q0R0	Uncharacterized protein	67.0124	32	16	482	52.3	5.16	0.943	0.92	0.924	0.929	1.049	1.08	1.042	1.057	0.946	1.074	1.022	1.014	1.13778	0.000723032	0.959319	0.331625	1.0915	0.0879899
J9P798	Uncharacterized protein	66.9231	9	4	130	14.8	10.13	1.032	0.937	1.002	0.990333	0.934	0.909	1.017	0.953333	1.014	1.116	1.04	1.05667	0.962639	0.438343	1.10839	0.0820762	1.06698	0.18523
J9NXY7	Uncharacterized protein	66.9145	14	14	269	29.8	7.47	0.994	0.994	0.973	0.987	0.975	0.977	1.024	0.992	1.047	1.011	1.005	1.021	1.00507	0.788977	1.02923	0.233763	1.03445	0.0841266
J9P2G7	Uncharacterized protein	66.8675	11	7	166	18.7	7.88	1.008	1.002	0.991	1.00033	0.997	1.024	1.03	1.017	1	0.974	0.974	0.982667	1.01666	0.214384	0.966241	0.0618094	0.982339	0.151855
J9P702	Guanine nucleotide-binding protein subunit gamma	66.6667	4	4	72	8	8.97	1.02	0.881	1.073	0.991333	1.125	0.918	1.073	1.03867	0.963	0.979	0.967	0.969667	1.04775	0.605322	0.933569	0.330571	0.978144	0.725228
O46550	Caveolin-2	66.6667	8	7	162	17.9	5.26	1.014	1.098	1.124	1.07867	1.056	0.87	1.026	0.984	0.947	0.933	0.932	0.937333	0.912237	0.227823	0.952575	0.465129	0.868974	0.0135499
J9P7Y9	Uncharacterized protein	66.573	16	10	356	37.4	7.09	1.034	0.933	1.071	1.01267	1.013	0.918	1.006	0.979	0.984	1.042	0.998	1.008	0.966754	0.547732	1.02962	0.45641	0.995392	0.922033
F1PGY1	Uncharacterized protein	66.5079	38	26	630	73	5.19	1.056	1.018	1.09	1.05467	0.876	0.963	0.978	0.939	1.007	0.997	1.015	1.00633	0.890329	0.0382354	1.07171	0.104852	0.954172	0.0871958
E2RGJ9	Uncharacterized protein	65.9933	16	13	297	34	8.41	1.13	1.081	1.091	1.10067	0.985	1.044	0.977	1.002	0.883	0.917	0.892	0.897333	0.910357	0.0189002	0.895542	0.0111268	0.815263	0.000356095
E2RLS3	Uncharacterized protein	65.884	42	29	724	83.2	5.03	1.095	1.072	1.094	1.087	1.009	1.024	1.004	1.01233	0.882	0.933	0.887	0.900667	0.931309	0.00148204	0.889694	0.00297079	0.82858	0.000479158
F1PYG8	Malate dehydrogenase	65.6805	18	18	338	35.4	8.54	1.005	1.019	0.937	0.987	0.953	1.001	1.013	0.989	1.046	1.004	1.022	1.024	1.00203	0.95206	1.03539	0.18684	1.03749	0.258233
F6UYJ9	Calreticulin	65.5172	20	20	406	47.1	4.55	0.887	0.983	0.978	0.949333	0.939	0.999	1.004	0.980667	1.074	1.066	1.069	1.06967	1.03301	0.450901	1.09075	0.0133121	1.12676	0.0183638
E2RAE2	Uncharacterized protein	65.4655	17	17	333	35	8.54	0.993	0.963	0.915	0.957	1.029	1.002	1.016	1.01567	1.064	1.02	0.998	1.02733	1.0613	0.0709941	1.01149	0.60663	1.07349	0.0781434
L7N0B2	Tubulin alpha chain	65.4102	23	0	451	50.1	5.06	1.024	0.999	1.079	1.034	1.02	0.994	0.964	0.992667	0.975	0.972	0.972	0.973	0.960026	0.222411	0.980188	0.291791	0.941006	0.0613756
E2R948	Uncharacterized protein	65.3061	14	14	294	31.6	7.55	0.95	0.931	0.916	0.932333	1.018	1.043	1.054	1.03833	1.026	1.04	1.022	1.02933	1.11369	0.00186195	0.991332	0.493863	1.10404	0.000994612
E2RLQ9	Uncharacterized protein	65.2068	44	43	822	91	5.4	1.028	1.049	1.015	1.03067	0.955	0.944	0.992	0.963667	1.026	0.983	1.009	1.006	0.934994	0.0189047	1.04393	0.0916825	0.976067	0.196916
J9NRU3	Uncharacterized protein	65.1685	5	5	89	10.4	7.21	0.912	0.902	0.952	0.922	1.051	0.981	0.954	0.995333	1.002	1.161	1.085	1.08267	1.07954	0.0883133	1.08774	0.18275	1.17426	0.0293689
E2R5N5	Uncharacterized protein	65.1596	23	23	376	42.9	5.81	1.001	1.031	0.953	0.995	1.009	1.071	0.985	1.02167	0.993	0.98	0.978	0.983667	1.0268	0.479602	0.962806	0.218383	0.98861	0.650725
E2R0D6	Proliferating cell nuclear antigen	65.1341	15	15	261	28.8	4.69	1.101	0.942	1.092	1.045	1	0.821	1.012	0.944333	1.017	1.001	1.014	1.01067	0.903668	0.279064	1.07024	0.344648	0.967145	0.543689
E2RNB0	Histone H2A	65.035	9	5	143	15.1	10.74	0.915	0.984	0.893	0.930667	0.897	1.033	1.064	0.998	1.112	1.012	1.091	1.07167	1.07235	0.311346	1.07381	0.284362	1.1515	0.0262488
E2R6W9	Uncharacterized protein	65	10	10	200	22.4	5.44	1.048	0.991	0.997	1.012	0.964	0.964	1.005	0.977667	1.005	1.014	1.011	1.01	0.966074	0.204418	1.03307	0.0808942	0.998024	0.918128
E2R0F2	Uncharacterized protein	64.907	126	112	2633	281	5.59	0.998	0.987	1.008	0.997667	1.02	0.972	0.978	0.99	0.984	1.02	1.032	1.012	0.992315	0.662076	1.02222	0.351498	1.01437	0.41143
J9P3G1	Uncharacterized protein	64.8421	31	28	475	54.1	5.01	0.963	1.009	0.993	0.988333	0.959	1.031	0.995	0.995	1.043	0.997	1.01	1.01667	1.00675	0.801168	1.02178	0.43313	1.02867	0.214356
F1PAG6	Uncharacterized protein	64.8352	10	10	182	20.7	5.63	1.015	1.021	1.026	1.02067	0.996	1.049	0.99	1.01167	0.972	0.968	0.963	0.967667	0.991182	0.660659	0.956507	0.0807151	0.948073	0.000208468
E2RFC7	Uncharacterized protein	64.7541	15	15	244	28	6.65	1.01	0.997	0.977	0.994667	0.928	0.964	1.032	0.974667	1.042	1.026	1.025	1.031	0.979893	0.565473	1.0578	0.143202	1.03653	0.0304008
J9NRH5	Uncharacterized protein	64.7321	12	1	224	25.5	4.87	0.934	1.036	0.944	0.971333	0.863	1.029	1.051	0.981	1.073	1.034	1.036	1.04767	1.00995	0.893268	1.06796	0.333606	1.07859	0.0936597
F1PL97	Protein disulfide-isomerase	64.7059	30	28	510	57.4	4.96	0.972	0.979	0.953	0.968	1.002	1.059	1.011	1.024	1.005	1	1.018	1.00767	1.05785	0.0441943	0.984049	0.426874	1.04098	0.0136734
F1PL93	Uncharacterized protein	64.7059	15	15	204	23.4	5.2	0.964	1.014	1.029	1.00233	0.971	1.021	0.965	0.985667	1.025	1.001	1.009	1.01167	0.983372	0.563251	1.02638	0.245113	1.00931	0.677982
F1P790	Histone H2A	64.6154	7	1	130	14.1	11.05	0.879	0.946	0.925	0.916667	1.079	1.133	0.963	1.05833	1.05	1.087	0.938	1.025	1.15455	0.0583256	0.968504	0.646089	1.11818	0.0913848
E2QZ05	Uncharacterized protein	64.5161	21	21	403	44.4	5.16	1.052	1.048	1.03	1.04333	0.962	0.953	0.979	0.964667	1.01	0.974	0.992	0.992	0.924601	0.00151712	1.02833	0.101254	0.950799	0.0143818
E2R0S6	Annexin	64.5078	21	21	386	42.6	7.01	0.942	0.948	1.079	0.989667	1.065	0.973	0.971	1.003	1.005	1.021	0.997	1.00767	1.01347	0.818444	1.00465	0.890421	1.01819	0.711122
E2QTT8	Uncharacterized protein	64.4737	3	3	76	8.5	4.36	1.295	0.984	1.965	1.41467	0.897	0.567	1.08	0.848	0.732	0.785	0.695	0.737333	0.599434	0.157209	0.869497	0.507845	0.521206	0.0801937
F1PFZ7	Histone H2A	64.3411	7	1	129	14	10.9	0.949	0.898	0.927	0.924667	1.097	0.997	1.05	1.048	1.063	0.978	1.042	1.02767	1.13338	0.0190753	0.980598	0.625968	1.11139	0.0251477
L7N0D9	Histone H2A	64.3411	7	1	129	14	10.9	0.889	0.974	0.847	0.903333	0.981	0.994	1.089	1.02133	1.129	1.005	1.092	1.07533	1.13063	0.07983	1.05287	0.341728	1.19041	0.0304387
O18840	Actin, cytoplasmic 1	64.2667	20	1	375	41.7	5.48	0.955	0.703	1.479	1.04567	1.162	0.468	1.096	0.908667	0.91	1.111	1.117	1.046	0.868983	0.688833	1.15114	0.584756	1.00032	0.998952
J9P7P2	Uncharacterized protein	64.2599	15	15	277	30.6	7.77	0.99	0.949	1.013	0.984	1.006	0.903	1.032	0.980333	1.045	1.036	1.024	1.035	0.996274	0.937033	1.05576	0.242084	1.05183	0.060597
E2RGI5	Guanine nucleotide-binding protein subunit gamma	64.1791	3	3	67	7.3	9.85	1.096	1.111	1.037	1.08133	0.977	1.004	0.942	0.974333	0.926	0.949	0.959	0.944667	0.901048	0.020671	0.969552	0.22019	0.873613	0.00514424
E2R9S7	Uncharacterized protein	64.128	47	47	906	100.1	6.29	1.179	1.165	1.199	1.181	0.972	0.993	0.935	0.966667	0.829	0.869	0.86	0.852667	0.818515	0.000398421	0.882069	0.00543151	0.721987	3.03067e-05
F1PHV7	Uncharacterized protein	64.0212	9	4	189	21.2	5.17	0.95	0.942	0.923	0.938333	1.092	1.098	1.062	1.084	0.965	0.996	0.972	0.977667	1.15524	0.000444936	0.901907	0.00187132	1.04192	0.0332789
E2RSQ3	Uncharacterized protein	63.964	6	6	111	12.5	9.86	1.051	1.145	0.972	1.056	0.917	1.108	1.047	1.024	0.932	0.906	0.923	0.920333	0.969697	0.692789	0.898763	0.142226	0.871528	0.0551046
E2R9R2	Uncharacterized protein	63.9535	6	6	86	10.1	8.75	0.895	0.934	0.913	0.914	0.958	1.02	1.064	1.014	1.093	1.049	1.073	1.07167	1.10941	0.0378887	1.05687	0.158104	1.1725	0.000750606
E2RE39	Adenylate kinase 2, mitochondrial	63.9004	14	14	241	26.6	7.02	0.928	0.957	1.003	0.962667	1.018	1.11	1.008	1.04533	0.978	1.012	0.986	0.992	1.08587	0.102141	0.94898	0.19229	1.03047	0.290909
E2RSI6	Uncharacterized protein	63.8225	43	32	586	69.4	6.1	0.959	0.94	1.042	0.980333	1.018	0.981	0.972	0.990333	0.994	1.049	1.044	1.029	1.0102	0.78534	1.03904	0.160891	1.04964	0.246754
E2QVP6	Uncharacterized protein	63.8211	14	1	246	28.2	4.89	0.937	0.973	0.985	0.965	0.999	0.999	1.009	1.00233	1.017	1.07	1.011	1.03267	1.03869	0.0652098	1.03026	0.186366	1.07012	0.0458897
Z4YHI2	Uncharacterized protein	63.7566	20	0	378	42	5.38	0.882	0.866	1.272	1.00667	1.088	0.936	0.965	0.996333	0.922	1.042	1.028	0.997333	0.989735	0.944975	1.001	0.987511	0.990728	0.949341
J9NZV9	Uncharacterized protein	63.5922	32	32	1648	173.5	5.86	1.047	1.047	1.121	1.07167	1.007	0.978	0.952	0.979	0.962	0.957	0.929	0.949333	0.91353	0.034234	0.969697	0.19186	0.885848	0.0101945
E2RRD1	Uncharacterized protein	63.591	19	17	401	45.1	4.96	0.947	0.884	1.043	0.958	1.051	0.913	1.041	1.00167	1.028	1.052	1.041	1.04033	1.04558	0.533217	1.0386	0.438319	1.08594	0.15298
F1P7P3	Uncharacterized protein	63.5739	12	10	291	33.5	6.62	0.993	1	0.989	0.994	1.065	1.018	1.03	1.03767	0.966	0.962	0.977	0.968333	1.04393	0.0391754	0.933183	0.00940355	0.974178	0.0096489
F1PBK7	Uncharacterized protein	63.5535	23	23	439	49.2	5.3	1.002	0.998	1.02	1.00667	1.037	0.963	1.014	1.00467	0.991	0.989	0.986	0.988667	0.998013	0.934569	0.984074	0.505773	0.982119	0.0599794
Q53VB8	Ferritin light chain	63.4286	8	7	175	20.1	6	0.64	0.701	0.728	0.689667	1.435	1.522	1.195	1.384	0.985	0.916	0.877	0.926	2.00677	0.00236173	0.669075	0.0111833	1.34268	0.00446295
B4YY02	Adenylate kinase isoenzyme 1	63.3333	13	13	210	23.4	8.6	0.963	0.957	1.017	0.979	1.058	0.945	1.003	1.002	1.048	1.003	1.006	1.019	1.02349	0.575673	1.01697	0.658885	1.04086	0.170618
J9P497	Annexin	63.2911	18	17	316	35.4	5.67	1.057	1.112	1.052	1.07367	0.957	0.948	0.989	0.964667	1.024	0.932	0.927	0.961	0.898479	0.00890077	0.996199	0.919073	0.895064	0.0379959
F2Z4Q5	40S ribosomal protein S3a	63.2576	20	19	264	29.9	9.73	0.96	0.948	0.994	0.967333	1.014	0.971	0.966	0.983667	1.038	1.042	1.067	1.049	1.01688	0.471017	1.06642	0.0211228	1.08442	0.00775701
J9NYQ8	Uncharacterized protein	63.1944	8	8	144	16.5	5.24	0.914	0.974	0.948	0.945333	1.063	1.192	0.999	1.08467	0.946	0.992	0.972	0.97	1.14739	0.0787397	0.894284	0.120601	1.02609	0.322804
F1PWW0	Uncharacterized protein	63.1141	121	107	2646	280.5	6.11	1.034	1.021	1.026	1.027	1.004	0.964	0.972	0.98	0.969	0.997	1.012	0.992667	0.954236	0.0213194	1.01293	0.510456	0.966569	0.0594526
J9NU66	Uncharacterized protein	63.0952	4	4	84	9.4	7.21	0.998	1.01	0.971	0.993	1.003	1.016	1.012	1.01033	1.042	0.93	1.019	0.997	1.01746	0.227051	0.986803	0.717803	1.00403	0.916986
E2RJ26	Uncharacterized protein	63.0332	22	22	422	47.4	6.48	1.025	1.013	1.007	1.015	1.015	1.031	0.98	1.00867	0.97	0.976	0.983	0.976333	0.99376	0.711787	0.967944	0.105633	0.961905	0.00398247
E2RR58	60S ribosomal protein L12	63.0303	8	8	165	17.8	9.42	1.034	0.945	0.92	0.966333	0.945	0.981	1.012	0.979333	1.022	1.096	1.043	1.05367	1.01345	0.759413	1.0759	0.0642943	1.09038	0.100238
F1PQL8	Uncharacterized protein	63.0027	20	1	373	41.4	5.96	0.986	0.954	0.995	0.978333	1.066	1.023	0.966	1.01833	0.957	1.027	1.027	1.00367	1.04089	0.273255	0.985597	0.713442	1.02589	0.392294
F1Q331	T-complex protein 1 subunit delta	62.8942	30	29	539	58	7.83	1.028	0.966	1.017	1.00367	0.994	0.963	0.985	0.980667	0.997	1.031	1.02	1.016	0.977084	0.339032	1.03603	0.0602394	1.01229	0.598009
E2QWF5	Peptidylprolyl isomerase	62.7451	28	27	459	51.5	5.57	0.994	0.996	1.045	1.01167	0.988	1.014	0.986	0.996	0.995	0.991	0.991	0.992333	0.984514	0.455049	0.996319	0.708102	0.98089	0.312165
E2R2W6	Uncharacterized protein	62.6984	16	16	252	29	8.75	0.991	0.964	0.987	0.980667	1.07	0.981	1.035	1.02867	0.979	1.009	0.984	0.990667	1.04895	0.1526	0.963059	0.239179	1.0102	0.469372
E2RNQ8	Uncharacterized protein	62.6747	29	29	501	57	6.77	1.048	1.012	0.992	1.01733	1.001	0.982	1.003	0.995333	0.984	0.994	0.986	0.988	0.978375	0.281727	0.992632	0.375227	0.971166	0.153217
E2RR27	Cytochrome b-c1 complex subunit 6	62.6374	5	5	91	10.6	4.54	0.945	0.95	0.96	0.951667	1.056	0.881	1.103	1.01333	1.072	1.005	1.029	1.03533	1.0648	0.413804	1.02171	0.770053	1.08792	0.0140896
E2RLY5	Uncharacterized protein	62.6204	25	25	519	56.2	7.93	1.028	0.962	0.993	0.994333	1.021	0.953	1.009	0.994333	1.019	0.99	1.026	1.01167	1	1	1.01743	0.50469	1.01743	0.475211
E2RSL5	Uncharacterized protein	62.4277	17	17	346	38.3	5.36	0.996	1.01	0.966	0.990667	0.994	1.018	1.002	1.00467	1	1.018	0.996	1.00467	1.01413	0.396938	1	1	1.01413	0.392974
A0A077LQA5	Tubulin alpha chain	62.306	22	0	451	50.1	5.06	1.19	1.141	1.172	1.16767	0.871	0.763	0.952	0.862	1.031	0.945	0.935	0.970333	0.738224	0.00568473	1.12568	0.158851	0.831002	0.00422759
E2QXC6	Uncharacterized protein	62.2951	10	8	183	20.8	5.33	0.93	1.015	1.029	0.991333	1.076	1.05	1.083	1.06967	0.957	0.925	0.934	0.938667	1.07902	0.073653	0.877532	0.000695039	0.946873	0.179019
J9P0B2	Histone H2A	62.2222	7	0	135	14.7	10.84	0.854	0.923	0.91	0.895667	0.965	1.04	1.059	1.02133	1.084	1.096	1.072	1.084	1.14031	0.024359	1.06136	0.101019	1.21027	0.00107189
E2QY85	Uncharacterized protein	62.2093	8	8	172	19.9	4.81	0.969	1.003	1.044	1.00533	0.993	1.025	0.957	0.991667	0.981	1.021	1.006	1.00267	0.986406	0.664706	1.01109	0.655313	0.997347	0.918968
E2QW49	Uncharacterized protein	62.1827	20	19	394	43.8	6.55	1.048	0.976	1.004	1.00933	1.001	0.901	1.042	0.981333	1.014	1.023	0.991	1.00933	0.972259	0.582067	1.02853	0.549966	1	1
F1PEZ4	Uncharacterized protein	62.1795	10	3	156	18	9.64	1.044	1.089	1.034	1.05567	0.918	0.978	0.929	0.941667	1.008	1.019	0.981	1.00267	0.892011	0.0103738	1.06478	0.0477764	0.949795	0.0596573
E2QZ50	Adenylyl cyclase-associated protein	62.1053	25	23	475	51.4	7.52	1.033	0.991	0.981	1.00167	0.961	0.991	1	0.984	1.015	1.023	1.005	1.01433	0.982363	0.423081	1.03083	0.0782127	1.01265	0.491847
E2R9F5	Uncharacterized protein	62.069	11	11	261	27.1	8.27	0.973	0.969	0.933	0.958333	1.03	0.97	1.041	1.01367	1.043	1.026	1.015	1.028	1.05774	0.0955139	1.01414	0.575143	1.0727	0.00993572
E2RFD6	Uncharacterized protein	62.0513	11	11	195	22.8	5.01	0.988	0.998	0.968	0.984667	1.05	1.025	1.031	1.03533	0.98	0.99	0.97	0.98	1.05146	0.0119879	0.946555	0.00431534	0.995261	0.680856
P00011	Cytochrome c	61.9048	7	7	105	11.6	9.58	0.852	0.887	0.915	0.884667	0.886	0.956	1.085	0.975667	1.169	1.029	1.22	1.13933	1.10286	0.210417	1.16775	0.115328	1.28787	0.0131682
F1PSI7	Uncharacterized protein	61.8644	8	8	118	13.5	9.91	1.06	0.857	1.176	1.031	0.996	0.771	1.032	0.933	1.031	1.075	1.002	1.036	0.904947	0.473333	1.1104	0.289227	1.00485	0.960799
Q38QA2	Actin (Fragment)	61.8182	5	1	110	12.2	5.01	0.989	0.775	1.175	0.979667	1.329	0.873	1.11	1.104	0.829	1.03	0.89	0.916333	1.12691	0.517072	0.830012	0.263816	0.935352	0.651579
J9P0X7	Uncharacterized protein	61.7886	7	7	123	13.8	5.01	0.913	1.062	0.915	0.963333	1.026	1.177	0.993	1.06533	0.969	0.984	0.959	0.970667	1.10588	0.246037	0.911139	0.1727	1.00761	0.890204
F1Q0H3	Ras-related protein Rab-1A	61.6	14	6	250	27	8.88	0.961	0.947	0.957	0.955	0.961	1.041	1.012	1.00467	1.029	1.059	1.034	1.04067	1.05201	0.104696	1.03583	0.225677	1.0897	0.00108785
F1PIV8	Uncharacterized protein	61.5942	9	8	138	15.8	5.71	1	0.952	1.077	1.00967	0.982	0.914	1.013	0.969667	1.082	0.987	0.993	1.02067	0.960383	0.43992	1.0526	0.295422	1.01089	0.828698
F2Z4P9	Ras-related protein Rab-10	61.5	15	12	200	22.5	8.38	0.978	0.988	0.947	0.971	1.006	1.043	0.989	1.01267	1.01	1.044	0.995	1.01633	1.04291	0.107626	1.00362	0.873129	1.04669	0.0758897
F1PXU1	Uncharacterized protein	61.379	122	112	2364	274.3	5.55	1.084	1.087	1.092	1.08767	1.037	1.031	1.002	1.02333	0.855	0.903	0.909	0.889	0.940852	0.00434212	0.86873	0.00266375	0.817346	0.000324304
E2R574	Uncharacterized protein	61.3272	25	25	437	50.1	6.74	0.992	0.998	0.941	0.977	0.976	1.031	0.993	1	1.019	1.027	1.023	1.023	1.02354	0.397793	1.023	0.233935	1.04708	0.0651266
F1PZ47	Uncharacterized protein	61.2613	19	19	333	38.3	6.35	0.94	0.891	0.993	0.941333	0.984	0.969	1.051	1.00133	1.025	1.09	1.057	1.05733	1.06374	0.196607	1.05593	0.149336	1.12323	0.0293326
E2RBC3	Tubulin alpha chain	61.1607	21	3	448	49.9	5.06	1.018	1.021	1.068	1.03567	0.956	0.873	0.987	0.938667	1.05	0.998	1.029	1.02567	0.906341	0.0617231	1.09268	0.0796656	0.990344	0.674926
F1PQ40	Uncharacterized protein	61.1364	24	22	440	49.2	6.21	0.927	1.001	1.041	0.989667	1.028	1.045	1.001	1.02467	0.989	0.994	0.973	0.985333	1.03537	0.383197	0.961614	0.0512487	0.995621	0.904702
E2R1J6	Eukaryotic translation initiation factor 3 subunit E	61.1236	22	22	445	52.2	6.04	1.069	1.051	1.069	1.063	0.91	1.038	0.942	0.963333	0.965	0.974	0.98	0.973	0.90624	0.0626038	1.01003	0.815083	0.915334	0.000264544
E2RA50	Uncharacterized protein	61.0478	22	5	439	48.3	6.34	0.993	0.999	0.964	0.985333	1.015	1.036	1.004	1.01833	1.001	1.004	0.985	0.996667	1.03349	0.0824439	0.978723	0.122324	1.0115	0.409355
J9P7X1	Histone H3	61.0294	9	1	136	15.4	11.27	1.182	1.225	1.289	1.232	0.843	0.89	0.886	0.873	0.898	0.905	0.882	0.895	0.708604	0.000483596	1.0252	0.253593	0.726461	0.000449966
E2R6K5	Histone H3	61.0294	9	2	136	15.3	11.27	0.932	0.966	0.939	0.945667	0.935	0.935	1.043	0.971	1.157	0.982	1.113	1.084	1.02679	0.535978	1.11637	0.15077	1.14628	0.0611803
J9PB22	Histone H3	61.0294	9	1	136	15.4	11.12	0.751	0.783	1.153	0.895667	0.868	1.184	1.043	1.03167	0.992	1.198	1.028	1.07267	1.15184	0.43816	1.03974	0.731271	1.19762	0.285768
F1P7B0	Uncharacterized protein	60.9428	17	17	297	34.4	9.73	0.954	0.926	1.078	0.986	0.982	0.991	0.964	0.979	0.988	1.085	1.032	1.035	0.992901	0.889682	1.0572	0.127046	1.0497	0.419254
F1PIC7	Uncharacterized protein	60.8563	37	34	654	72.2	5.16	0.898	0.915	0.962	0.925	0.947	1.051	0.971	0.989667	1.043	1.111	1.102	1.08533	1.06991	0.153773	1.09667	0.0654807	1.17333	0.00500736
F2Z4P4	Elongation factor 1-alpha	60.8225	23	0	462	50.1	9.01	1.016	0.973	1.022	1.00367	0.999	1.01	0.973	0.994	0.981	1.018	1.008	1.00233	0.990369	0.636531	1.00838	0.620883	0.998672	0.947366
E2R9T6	Uncharacterized protein	60.7692	16	16	390	43	5.26	0.993	1.007	1.005	1.00167	0.999	1.007	0.989	0.998333	0.995	1.006	1	1.00033	0.996672	0.649606	1.002	0.759492	0.998669	0.81732
F1PE28	Uncharacterized protein	60.7639	27	27	576	63.1	7.15	1.052	1.028	0.998	1.026	0.938	0.97	0.959	0.955667	1.052	0.985	1.019	1.01867	0.931449	0.0181566	1.06592	0.0428001	0.992853	0.782698
L7N0G4	Tubulin alpha chain	60.7539	21	0	451	50.1	5.06	1.14	1.088	1.03	1.086	0.947	1	0.916	0.954333	0.972	0.935	0.972	0.959667	0.87876	0.0304825	1.00559	0.85542	0.883671	0.0207088
E2RCY1	Uncharacterized protein	60.4938	15	14	324	36.7	5.88	1.035	1.012	0.939	0.995333	1.009	1.078	0.99	1.02567	0.991	0.983	0.963	0.979	1.03048	0.484298	0.954501	0.170932	0.98359	0.616345
E2QY95	Uncharacterized protein	60.4215	24	9	427	49.1	5.68	1.001	0.975	0.986	0.987333	1.063	0.887	1.056	1.002	0.953	1.035	1.044	1.01067	1.01485	0.812914	1.00865	0.89946	1.02363	0.478969
F1PLL0	Uncharacterized protein	60.3306	7	7	121	13.4	10.59	0.952	0.972	0.936	0.953333	1.024	1.027	1.049	1.03333	1.023	0.994	1.023	1.01333	1.08392	0.00359792	0.980645	0.184074	1.06294	0.0134479
E2RN38	Uncharacterized protein	60.3175	17	17	315	37.1	4.63	0.895	0.938	1.054	0.962333	1.003	0.989	1.035	1.009	1.011	1.034	1.041	1.02867	1.04849	0.398296	1.01949	0.295456	1.06893	0.241925
E2QWL1	Uncharacterized protein	60.2273	19	17	352	39.6	5.14	1.048	1.045	1.054	1.049	1.003	0.992	1.004	0.999667	0.946	0.97	0.937	0.951	0.952971	0.000453047	0.951317	0.0100072	0.906578	0.000655532
F1PIJ6	Uncharacterized protein	60.2113	13	12	284	32.2	6.02	0.943	0.923	1.052	0.972667	1.061	1.01	0.99	1.02033	0.989	1.004	1.028	1.007	1.04901	0.352206	0.986932	0.608054	1.0353	0.456195
E2RCD6	tRNA-splicing ligase RtcB homolog	60.198	24	24	505	55.1	7.23	1.029	0.954	1.099	1.02733	1.021	0.905	1.001	0.975667	1	0.982	1.008	0.996667	0.949708	0.40139	1.02152	0.597018	0.970149	0.511106
E2R311	UDP-glucose 6-dehydrogenase	60.1215	22	22	494	55	7.37	0.952	1.049	0.915	0.972	0.999	1.131	0.943	1.02433	0.977	1.025	1.008	1.00333	1.05384	0.487879	0.979499	0.733326	1.03224	0.500481
P63273	40S ribosomal protein S17	60	8	8	135	15.5	9.85	0.917	0.971	0.971	0.953	1.009	1.023	1.007	1.013	1.032	1.012	1.058	1.034	1.06296	0.0325829	1.02073	0.214206	1.08499	0.0224047
F1PIP0	Uncharacterized protein	59.9732	37	37	747	81.5	8.9	0.951	0.987	1	0.979333	0.973	0.983	1.008	0.988	1.054	1.014	1.029	1.03233	1.00885	0.654899	1.04487	0.0470785	1.05412	0.0473749
F6V5M4	Uncharacterized protein	59.9398	22	21	332	38.3	5.52	0.975	1.004	0.997	0.992	1.011	1.051	0.985	1.01567	0.983	1.007	0.986	0.992	1.02386	0.324589	0.976698	0.315177	1	1
E2R0N3	Annexin	59.7523	19	18	323	36.2	6.55	1.035	0.996	0.965	0.998667	1.08	0.992	1.008	1.02667	1.005	0.96	0.957	0.974	1.02804	0.45403	0.948701	0.166677	0.9753	0.388445
J9P1N0	Uncharacterized protein	59.7468	18	18	395	44.9	7.78	0.993	1.01	1.007	1.00333	1.038	1.02	1.005	1.021	0.983	0.971	0.973	0.975667	1.01761	0.179848	0.955599	0.0114329	0.972425	0.0125545
E2RMK6	Uncharacterized protein	59.7458	22	22	472	51	8.4	1.002	0.959	0.943	0.968	1.005	0.994	1.006	1.00167	1.018	1.041	1.032	1.03033	1.03478	0.135273	1.02862	0.0205706	1.06439	0.0297158
F1PDX9	T-complex protein 1 subunit gamma	59.6639	29	2	476	53.1	7.59	1.078	1.04	0.999	1.039	0.894	1.026	0.97	0.963333	0.992	0.99	1.01	0.997333	0.927174	0.164547	1.03529	0.43008	0.959897	0.153303
J9JHN1	Uncharacterized protein	59.633	12	11	218	24.5	5.94	1.024	1.018	0.985	1.009	0.962	1.03	0.999	0.997	1.004	0.995	0.984	0.994333	0.988107	0.630761	0.997325	0.902727	0.985464	0.336258
E2R9R5	Peptidylprolyl isomerase	59.5745	7	7	141	15.4	8.6	0.953	0.965	1.045	0.987667	1.086	0.893	1.028	1.00233	1.033	0.946	1.052	1.01033	1.01485	0.830113	1.00798	0.909135	1.02295	0.630384
F1PEI2	Uncharacterized protein	59.5638	33	33	596	65.4	5.71	0.928	0.966	0.909	0.934333	0.98	1.047	1.001	1.00933	1.035	1.064	1.07	1.05633	1.08027	0.0444418	1.04657	0.105445	1.13057	0.00361307
A1DZY5	Mitochondrial diablo-like protein	59.4937	11	11	237	26.8	6	1.057	0.98	0.927	0.988	0.932	1.083	0.996	1.00367	1.003	1.032	0.99	1.00833	1.01586	0.799715	1.00465	0.92322	1.02058	0.635756
E2R7F1	Uncharacterized protein	59.4454	38	27	577	67.9	6.47	1.032	1.053	1.019	1.03467	1.014	1.009	0.965	0.996	0.951	0.987	0.969	0.969	0.962629	0.104167	0.972892	0.222622	0.936534	0.0102299
E2QY46	Uncharacterized protein	59.4262	10	10	244	25.7	6.9	0.928	0.941	1.063	0.977333	1.105	0.949	0.969	1.00767	0.995	1.034	1.017	1.01533	1.03104	0.665945	1.00761	0.886216	1.03888	0.440837
Q28298	Ribosome-binding protein 1	59.322	67	65	1534	164.5	9.16	1.026	1.057	1.001	1.028	0.953	1	0.977	0.976667	1.042	0.957	0.988	0.995667	0.950065	0.0720203	1.01945	0.538759	0.968547	0.336779
E2RND8	Uncharacterized protein	59.2179	8	8	179	19.2	8.44	0.924	0.95	0.948	0.940667	0.939	1	1.014	0.984333	1.054	1.101	1.069	1.07467	1.04642	0.149188	1.09177	0.0282697	1.14245	0.00116112
F1P9J3	Myosin-9	59.0306	119	94	1960	226.3	5.6	0.963	0.962	1.068	0.997667	0.989	0.974	0.977	0.98	0.985	1.044	1.038	1.02233	0.982292	0.644529	1.0432	0.0933194	1.02472	0.569459
E2RMN2	Proteasome subunit alpha type	58.9431	15	15	246	27.4	6.76	0.994	0.992	0.996	0.994	1.028	1.046	0.983	1.019	0.984	1	0.978	0.987333	1.02515	0.253725	0.968924	0.185915	0.993293	0.373901
Q5WR10	Spliceosome RNA helicase DDX39B	58.8785	24	9	428	49	5.67	0.933	0.912	0.992	0.945667	1.021	0.95	1.017	0.996	1.048	1.078	1.049	1.05833	1.05323	0.204345	1.06258	0.0675471	1.11914	0.0121383
J9NRV4	Uncharacterized protein	58.8745	11	11	231	27.1	5.2	1.025	0.982	1.091	1.03267	1.061	0.908	1.01	0.993	0.997	0.943	0.982	0.974	0.961588	0.510864	0.980866	0.711137	0.943189	0.174232
J9NSW5	Uncharacterized protein	58.6298	48	46	759	83.7	8.05	0.971	1.003	0.998	0.990667	0.958	0.949	0.97	0.959	1.083	1.015	1.053	1.05033	0.968035	0.0531175	1.09524	0.0113783	1.06023	0.0537123
E2RM43	Uncharacterized protein	58.5859	10	10	198	22.9	8.16	1.044	1.023	1.012	1.02633	1.003	1.03	1.003	1.012	0.975	0.965	0.947	0.962333	0.986034	0.332232	0.950922	0.0150855	0.937642	0.00680577
F1PBH0	Chloride intracellular channel protein	58.5657	11	11	251	28.2	5.76	1.038	1.016	0.971	1.00833	1	0.995	1.029	1.008	1.006	0.989	0.955	0.983333	0.999669	0.988833	0.975529	0.250278	0.975207	0.369934
E2RC92	Uncharacterized protein	58.4416	8	8	154	17.4	6.54	0.996	0.965	1.009	0.99	0.989	1.021	1.02	1.01	0.998	0.99	1.013	1.00033	1.0202	0.298512	0.990429	0.481866	1.01044	0.520561
E2RF73	DNA helicase	58.4158	41	41	808	91	5.76	1.047	1.024	0.985	1.01867	0.993	0.949	1.008	0.983333	1.014	0.972	1.007	0.997667	0.965314	0.235293	1.01458	0.549552	0.979385	0.399204
F6XQ49	Prefoldin subunit 3	58.3756	12	12	197	22.5	6.28	1.015	0.972	0.964	0.983667	1.077	1.026	1.021	1.04133	0.959	0.979	0.988	0.975333	1.05862	0.0732758	0.93662	0.0291897	0.991528	0.667562
F1PSC2	Uncharacterized protein	58.3628	106	92	2541	269.6	6.14	1.066	0.996	1.087	1.04967	1.028	0.945	0.977	0.983333	0.923	0.988	0.99	0.967	0.936805	0.144297	0.98339	0.643531	0.921245	0.0788141
E2R149	Uncharacterized protein	58.3333	10	9	192	21.9	9.95	1.008	0.844	1.115	0.989	1.024	0.725	1.015	0.921333	1.046	1.133	1.091	1.09	0.931581	0.619485	1.18307	0.171447	1.10212	0.2891
F2Z4N2	Histone H4	58.2524	8	8	103	11.4	11.36	0.802	0.915	0.969	0.895333	0.955	1.049	1.007	1.00367	1.106	1.091	1.106	1.101	1.121	0.126222	1.09698	0.0244249	1.22971	0.0141603
F1PX75	Uncharacterized protein	58.2343	28	18	589	65.3	5.11	1.062	0.987	1.072	1.04033	0.988	0.924	0.992	0.968	0.987	0.98	1.009	0.992	0.930471	0.105552	1.02479	0.368492	0.953541	0.161801
Q38JA9	Caspase 8	58.2305	21	21	486	56.5	5.39	0.994	0.979	1.045	1.006	1	0.928	1.038	0.988667	1.019	0.994	1.003	1.00533	0.98277	0.67148	1.01686	0.640806	0.999337	0.976498
Q9XSU9	Ribosomal protein S14 (Fragment)	58.2278	4	1	79	8.4	11.87	0.945	0.979	1.118	1.014	1.136	0.937	1.022	1.03167	0.907	1.046	0.91	0.954333	1.01742	0.832455	0.92504	0.352985	0.941157	0.442108
F6Y478	Uncharacterized protein	58.1818	12	6	165	19.1	8.69	1.075	0.971	1.17	1.072	0.946	0.803	0.995	0.914667	1.029	1.008	1.002	1.013	0.853234	0.125275	1.10751	0.16624	0.944963	0.366902
E2RNW5	Uncharacterized protein	58.1197	21	21	468	54.3	6.35	0.925	0.893	0.963	0.927	1.017	0.954	1.001	0.990667	1.069	1.101	1.077	1.08233	1.06868	0.0830118	1.09253	0.0124303	1.16757	0.00227081
F1PUM3	Uncharacterized protein	58.0913	14	14	241	27.4	7.69	0.984	0.992	0.996	0.990667	0.997	0.956	1.019	0.990667	1.05	0.991	1.015	1.01867	1	1	1.02826	0.328531	1.02826	0.184644
H9GWE2	Uncharacterized protein	58.0645	12	12	310	33.5	6.89	0.984	0.987	1.073	1.01467	1.005	0.941	1.007	0.984333	1.011	0.995	0.997	1.001	0.970105	0.450933	1.01693	0.495485	0.986531	0.668388
J9NZX6	Uncharacterized protein	58.042	9	9	143	15.8	10.49	0.983	1.009	0.981	0.991	0.963	0.963	0.988	0.971333	1.08	0.988	1.045	1.03767	0.980155	0.184495	1.06829	0.0774351	1.04709	0.174329
E2RF07	Uncharacterized protein	57.9882	9	9	169	19.4	9.48	0.946	0.975	0.944	0.955	1.05	1.014	1.039	1.03433	1.029	1.016	0.988	1.011	1.08307	0.00559494	0.977441	0.221266	1.05864	0.023468
E2RSU3	Elongation factor Tu	57.9646	21	21	452	49.4	7.37	0.91	0.962	0.953	0.941667	1.005	1.069	1.013	1.029	1.026	1.024	1.037	1.029	1.09274	0.0274713	1	1	1.09274	0.00617793
E2QWG8	Eukaryotic translation initiation factor 3 subunit M	57.754	15	15	374	42.5	5.63	1	0.957	1.053	1.00333	1.037	0.945	0.977	0.986333	0.969	1.038	1.024	1.01033	0.983056	0.683169	1.02433	0.521669	1.00698	0.850589
E2RCF9	Uncharacterized protein	57.7039	14	6	331	34.9	8	0.981	0.942	1.014	0.979	1.093	0.978	1.047	1.03933	0.972	0.977	0.997	0.982	1.06163	0.200148	0.944836	0.169741	1.00306	0.898879
E2RG27	Uncharacterized protein	57.7008	77	76	1357	156.5	5.57	0.969	0.996	0.962	0.975667	0.968	1.006	1.02	0.998	1.047	1.011	1.021	1.02633	1.02289	0.297795	1.02839	0.207821	1.05193	0.0273711
F1PTP2	Uncharacterized protein	57.6779	12	12	267	28.6	5.52	1.022	1.037	1.083	1.04733	0.934	0.992	1.002	0.976	1.03	0.947	0.953	0.976667	0.931891	0.0636965	1.00068	0.985342	0.932527	0.0947553
F6V4W0	Uncharacterized protein	57.6497	25	23	451	51.2	6.95	1.038	1.022	0.998	1.01933	1.045	1.095	0.996	1.04533	0.917	0.954	0.933	0.934667	1.02551	0.446829	0.894133	0.0222411	0.916939	0.00586209
E2RD86	Protein disulfide-isomerase	57.6238	29	23	505	56.7	6.13	0.999	0.99	1.001	0.996667	0.96	0.967	0.977	0.968	1.056	1.005	1.047	1.036	0.971237	0.00869507	1.07025	0.0145155	1.03946	0.0706976
E2R3V2	Uncharacterized protein	57.5758	4	4	99	10.6	4.36	1	0.87	1.004	0.958	1.071	0.878	1.122	1.02367	1.025	0.992	1.038	1.01833	1.06855	0.489399	0.99479	0.947115	1.06298	0.260705
E2RLL6	Uncharacterized protein	57.5472	27	27	530	58	7.47	1.029	1.005	0.971	1.00167	1.02	0.974	1.007	1.00033	0.995	0.994	1.005	0.998	0.998669	0.953937	0.997667	0.876885	0.996339	0.841508
J9P766	Calponin	57.4661	10	1	221	24.1	9.23	0.961	1.016	1.006	0.994333	0.955	1.165	1.042	1.054	0.874	1.047	0.935	0.952	1.06001	0.398733	0.903226	0.267396	0.957425	0.47235
F1PXZ9	Uncharacterized protein	57.4468	7	2	188	21.4	8.12	0.931	1.015	1.047	0.997667	1.011	1.149	0.96	1.04	0.915	1	0.973	0.962667	1.04243	0.557342	0.925641	0.27881	0.964918	0.458654
E2R1S5	Eukaryotic translation initiation factor 6	57.438	8	8	242	26.3	4.68	1.008	0.919	0.969	0.965333	1.024	0.882	0.986	0.964	1.072	1.07	1.071	1.071	0.998619	0.979861	1.111	0.0652978	1.10946	0.0148367
Q5MAR8	Cofilin 2 (Fragment)	57.4074	4	1	54	6.2	9	1.286	1.277	1.074	1.21233	1.049	0.927	1.138	1.038	0.852	0.625	0.772	0.749667	0.8562	0.132138	0.722222	0.0331504	0.618367	0.00851601
J9NRN0	Uncharacterized protein	57.4048	36	1	709	77.8	8.02	0.997	0.971	1.054	1.00733	1.019	1.02	0.975	1.00467	0.966	1.016	0.982	0.988	0.997353	0.93032	0.983411	0.470149	0.980807	0.536151
E2RGE0	Uncharacterized protein	57.3034	4	4	89	10.1	6.09	0.807	0.976	1.018	0.933667	1.007	1.257	0.937	1.067	1.032	0.996	0.97	0.999333	1.14281	0.316549	0.936582	0.530942	1.07033	0.382158
E2RTC3	RuvB-like helicase	57.2354	24	24	463	51.2	5.64	1.013	0.972	1.036	1.007	0.983	0.967	0.981	0.977	1.009	1.024	1.016	1.01633	0.970209	0.19658	1.04026	0.00407244	1.00927	0.65252
F1PPH7	Uncharacterized protein	57.0439	24	24	433	48.6	5.95	0.983	1.003	0.988	0.991333	1	1.019	0.983	1.00067	1.018	0.998	1.008	1.008	1.00941	0.480454	1.00733	0.570858	1.01681	0.116117
F1PLV2	Peptidyl-prolyl cis-trans isomerase	56.9444	13	12	216	23.8	9.32	0.993	0.99	0.947	0.976667	0.967	1.05	1.006	1.00767	1.011	1.018	1.017	1.01533	1.03174	0.333443	1.00761	0.766068	1.03959	0.0616781
J9NXM6	Uncharacterized protein	56.9024	14	14	297	34.3	9.89	0.903	0.923	0.928	0.918	1.049	1.105	1.047	1.067	1.023	1.003	1.019	1.015	1.16231	0.00189835	0.951265	0.0597743	1.10566	0.000580372
F1PSK6	Uncharacterized protein	56.9002	24	17	471	53.1	6.81	0.962	0.954	1.018	0.978	1.02	0.962	0.981	0.987667	1.023	1.03	1.05	1.03433	1.00988	0.732756	1.04725	0.0689285	1.0576	0.0602815
F1PHQ0	Clathrin heavy chain	56.8955	76	57	1675	191.5	5.69	0.987	0.964	1.006	0.985667	0.986	0.963	0.973	0.974	1.037	1.049	1.035	1.04033	0.988164	0.446958	1.0681	0.00113599	1.05546	0.0133074
E2RCZ7	Core histone macro-H2A	56.7204	16	14	372	39.6	9.79	0.953	0.97	0.947	0.956667	0.923	0.99	1.06	0.991	1.075	1.041	1.041	1.05233	1.03589	0.440645	1.06189	0.210293	1.1	0.00195837
F6Y8P9	MICOS complex subunit MIC60	56.6709	42	42	787	86.9	6.48	0.968	0.979	0.991	0.979333	1.007	1.006	0.994	1.00233	1.027	1.012	1.015	1.018	1.02349	0.0427486	1.01563	0.0648897	1.03948	0.00869937
E2QWY6	Uncharacterized protein	56.6553	16	16	293	31.2	10.24	0.961	0.97	0.951	0.960667	0.957	0.966	0.986	0.969667	1.062	1.084	1.063	1.06967	1.00937	0.426431	1.10313	0.000862736	1.11346	0.000270231
J9P9J4	Uncharacterized protein	56.6116	23	1	484	52.9	7.58	0.693	0.884	0.9	0.825667	1.139	1.036	0.965	1.04667	1.213	1.16	1.011	1.128	1.26766	0.0571854	1.07771	0.360262	1.36617	0.0282033
F6Y460	Uncharacterized protein	56.5678	19	19	472	52.9	5.91	1.049	1.025	0.958	1.01067	0.978	1.006	1.025	1.003	1.008	0.969	0.98	0.985667	0.992414	0.813675	0.982719	0.388177	0.975264	0.445908
E2R503	NADH dehydrogenase [ubiquinone] 1 alpha subcomplex subunit 2	56.5657	7	7	99	10.9	9.45	1.024	1.05	0.898	0.990667	0.942	0.975	1.06	0.992333	1.092	0.971	0.989	1.01733	1.00168	0.978687	1.02519	0.652992	1.02692	0.680684
E2RQW2	Uncharacterized protein	56.3636	16	16	330	37.1	7.75	1.042	0.964	0.95	0.985333	1.053	0.908	1.077	1.01267	1.01	0.999	0.998	1.00233	1.02774	0.672589	0.989796	0.854731	1.01725	0.587699
E2R9Q9	Uncharacterized protein	56.3452	8	8	197	22.5	4.88	1.023	1.093	1.147	1.08767	1.12	1.004	1.047	1.057	0.86	0.851	0.856	0.855667	0.971805	0.567942	0.809524	0.00405555	0.786699	0.00298016
F2Z4N5	40S ribosomal protein S11	56.3291	11	11	158	18.4	10.3	0.987	0.978	0.928	0.964333	0.865	0.972	1.002	0.946333	1.096	1.079	1.093	1.08933	0.981334	0.712283	1.15111	0.0269705	1.12962	0.00280929
F1PJ65	Uncharacterized protein	56.3066	72	69	1657	189	6.34	1.01	1.037	1.028	1.025	0.968	1.014	0.989	0.990333	1.004	0.975	0.976	0.985	0.966179	0.0887439	0.994615	0.760537	0.960976	0.0319667
E2RAU5	Stress-70 protein, mitochondrial	56.2592	37	36	679	73.6	6.3	0.991	0.964	0.976	0.977	0.996	0.989	1.032	1.00567	1.001	1.028	1.024	1.01767	1.02934	0.136962	1.01193	0.488696	1.04162	0.0239582
E2QWU2	Uncharacterized protein	56.0784	10	10	255	28.4	8.62	0.942	0.981	0.932	0.951667	0.99	1.065	1.009	1.02133	1.026	1.007	1.048	1.027	1.0732	0.0614514	1.00555	0.834635	1.07916	0.0168216
A0M8U6	Testin	56.057	21	21	421	48	7.78	1.119	0.956	1.091	1.05533	0.932	0.939	0.983	0.951333	0.992	1.005	0.984	0.993667	0.901453	0.120165	1.0445	0.0684728	0.941567	0.290657
E2QYK6	Uncharacterized protein	56.0209	9	8	191	22.2	5.86	0.976	1.068	0.959	1.001	0.98	1.204	0.996	1.06	0.926	0.973	0.919	0.939333	1.05894	0.500216	0.886164	0.178826	0.938395	0.178733
E1AI07	Glyceraldehyde-3-phosphate dehydrogenase-like protein (Fragment)	55.9783	7	1	184	19.4	8.9	0.729	0.926	0.902	0.852333	0.913	2.43	0.752	1.365	0.807	0.761	0.78	0.782667	1.60149	0.394687	0.573382	0.337329	0.918264	0.334026
F1PK29	Uncharacterized protein	55.9211	17	17	456	49.6	5.11	1.107	1.037	1.042	1.062	0.974	0.876	0.984	0.944667	1.013	0.966	1.001	0.993333	0.889517	0.0464159	1.05152	0.2612	0.935342	0.0611805
E2RH09	Uncharacterized protein	55.9113	27	27	406	46.7	7.42	0.971	0.967	0.942	0.96	1.024	1.053	1.016	1.031	0.988	1.036	1.003	1.009	1.07396	0.00795732	0.978661	0.290843	1.05104	0.043633
F1Q2N5	Glutamate dehydrogenase	55.8522	25	25	487	53.9	8	0.983	0.966	1.005	0.984667	0.933	0.989	1.004	0.975333	1.038	1.049	1.033	1.04	0.990521	0.721286	1.0663	0.0430712	1.05619	0.0106478
F1P679	Uncharacterized protein	55.8473	19	19	419	47.6	6.13	0.992	0.993	0.986	0.990333	0.991	1.025	0.991	1.00233	0.998	1.019	1.005	1.00733	1.01212	0.357208	1.00499	0.718172	1.01717	0.0603122
J9JHN5	Uncharacterized protein	55.814	4	4	86	10.1	6.35	1.067	0.896	1.061	1.008	1.057	1.01	0.91	0.992333	0.958	1.071	0.97	0.999667	0.984458	0.835793	1.00739	0.902549	0.991733	0.90633
E2RLQ6	Uncharacterized protein	55.814	10	10	258	27.5	6.54	0.994	0.995	0.969	0.986	1.042	1.002	1.025	1.023	1.027	0.982	0.965	0.991333	1.03753	0.0617335	0.969045	0.220464	1.00541	0.806276
F1P9U4	Uncharacterized protein	55.6869	25	22	677	73.5	6.4	1.038	1.043	1.097	1.05933	0.98	0.973	0.979	0.977333	1.005	0.934	0.951	0.963333	0.922593	0.0125216	0.985675	0.550719	0.909377	0.0282272
E2QUJ4	Uncharacterized protein	55.5066	12	12	227	26.2	8.82	0.967	1.012	0.928	0.969	1.008	1.06	1.012	1.02667	1.013	0.995	1.006	1.00467	1.05951	0.121944	0.978571	0.277304	1.03681	0.224204
E2RH48	Uncharacterized protein	55.5024	22	21	418	47.3	5.21	0.981	0.999	1	0.993333	1.009	1.032	1.01	1.017	0.997	0.98	0.993	0.99	1.02383	0.0715719	0.973451	0.0411604	0.996644	0.699282
F6V234	Uncharacterized protein	55.3968	29	24	630	70.7	5.6	1.031	1.029	1.053	1.03767	0.987	1.003	0.967	0.985667	0.974	0.984	0.972	0.976667	0.949888	0.0159012	0.990869	0.461285	0.941214	0.00202986
E2RB79	T-complex protein 1 subunit gamma	55.3734	30	3	549	61.2	6.86	1.013	0.984	1.006	1.001	1.041	0.991	0.98	1.004	0.978	1.01	0.997	0.995	1.003	0.891799	0.991036	0.689543	0.994006	0.662547
J9NU67	Uncharacterized protein	55.2632	4	4	76	8.7	5.48	0.97	0.964	1.019	0.984333	1.041	1.026	1.122	1.063	0.975	0.97	0.911	0.952	1.07992	0.084965	0.895579	0.0374659	0.967152	0.296287
E2RGP2	Uncharacterized protein	55.2632	15	15	380	42.6	5.54	0.952	0.935	1.096	0.994333	0.96	0.959	0.986	0.968333	1.029	1.04	1.042	1.037	0.973852	0.642266	1.07091	0.00211662	1.04291	0.451765
J9NRT1	Uncharacterized protein	55.2632	4	4	114	12.7	9.51	0.883	0.969	0.877	0.909667	0.915	1.088	0.988	0.997	1.118	1.061	1.102	1.09367	1.09601	0.208414	1.09696	0.14188	1.20227	0.00578221
F1PCZ5	Microtubule-associated protein	55.2515	48	48	1133	118.7	5.15	1.009	1.007	1.001	1.00567	0.962	0.987	1	0.983	1.043	0.976	1.015	1.01133	0.977461	0.117834	1.02882	0.274594	1.00563	0.786606
F1Q332	Uncharacterized protein	55.207	36	35	797	88.9	8.48	0.982	0.973	1.017	0.990667	1.039	0.969	0.99	0.999333	1.016	1.012	1.002	1.01	1.00875	0.743407	1.01067	0.640584	1.01952	0.240868
E2RL34	60S ribosomal protein L18a	55.1136	11	11	176	20.8	10.81	0.907	0.949	1.007	0.954333	0.966	0.891	1.01	0.955667	1.086	1.108	1.075	1.08967	1.0014	0.977903	1.14022	0.0205601	1.14181	0.0114492
F1PLN2	Uncharacterized protein	55.0868	21	21	403	46.1	10.18	0.913	1.003	0.97	0.962	0.992	1.095	0.989	1.02533	1.009	1.033	0.997	1.013	1.06584	0.220398	0.987971	0.751882	1.05301	0.146281
F1PKR6	Uncharacterized protein	55	11	11	160	17.8	10.14	0.883	0.898	0.958	0.913	0.934	1.027	0.906	0.955667	1.045	1.253	1.096	1.13133	1.04673	0.378797	1.18382	0.0725037	1.23914	0.0306233
F1Q4K1	Uncharacterized protein	54.955	6	6	111	12.5	6.14	1.02	0.974	0.98	0.991333	0.957	0.967	1.031	0.985	1.027	1.024	1.019	1.02333	0.993611	0.827986	1.03892	0.175237	1.03228	0.093897
J9NTI3	Actin-related protein 2/3 complex subunit 5	54.902	8	8	153	16.9	6.6	1.052	1.054	0.973	1.02633	1.014	1.045	1.007	1.022	0.958	0.969	0.928	0.951667	0.995778	0.888892	0.931181	0.0141949	0.927249	0.0637224
J9NS37	Uncharacterized protein	54.8387	2	1	62	7.5	5.12	0.796	0.987	1.043	0.942	1.121	1.383	0.951	1.15167	0.896	0.954	0.868	0.906	1.22258	0.224875	0.786686	0.12776	0.961783	0.672025
F1PFI3	Uncharacterized protein	54.8223	6	6	197	20.4	7.37	1.01	0.957	0.982	0.983	1.037	0.935	1.02	0.997333	1.039	1.024	0.997	1.02	1.01458	0.703675	1.02273	0.539874	1.03764	0.132532
G1K268	Uncharacterized protein	54.7988	26	14	646	70.6	5.74	1.07	1.039	1.027	1.04533	0.927	0.972	0.968	0.955667	1.025	0.969	1.002	0.998667	0.914222	0.00961854	1.04499	0.118588	0.955357	0.0871485
J9NS92	Uncharacterized protein	54.6906	23	1	501	55	7.78	0.979	1.001	0.958	0.979333	0.958	0.915	1.018	0.963667	1.131	1.026	1.014	1.057	0.984003	0.653459	1.09685	0.121888	1.07931	0.118492
E2R7L1	Protein disulfide-isomerase A4	54.5171	33	32	642	72.4	5.17	0.981	0.969	0.955	0.968333	1.013	1.031	0.991	1.01167	1.037	0.993	1.03	1.02	1.04475	0.0347843	1.00824	0.665613	1.05336	0.0294903
E2R6L9	Importin subunit alpha	54.4423	18	17	529	57.9	5.27	1.334	1.155	1.26	1.24967	0.949	0.972	0.906	0.942333	0.782	0.825	0.816	0.807667	0.754068	0.00517034	0.857092	0.00449106	0.646306	0.0011758
E2RSU7	Uncharacterized protein	54.4379	15	15	338	38.3	5.43	1.025	0.968	0.958	0.983667	1.016	1.047	0.974	1.01233	0.956	1.037	1.018	1.00367	1.02914	0.389293	0.991439	0.801933	1.02033	0.567578
F2Z4Q1	40S ribosomal protein S4	54.3726	15	15	263	29.6	10.15	0.962	1.028	0.958	0.982667	0.947	1.06	0.982	0.996333	1.036	1.004	1.021	1.02033	1.01391	0.752043	1.02409	0.52669	1.03833	0.199101
E2R3R2	Proteasome subunit beta type	54.3726	12	12	263	28.5	6.68	0.958	1.024	0.967	0.983	1.006	1.04	1.01	1.01867	1	0.995	0.998	0.997667	1.03628	0.200319	0.979385	0.124433	1.01492	0.518008
E2RT63	Heat shock 70 kDa protein 4	54.1667	43	41	840	94.3	5.16	1.01	0.961	1.044	1.005	0.926	0.935	0.992	0.951	1.035	1.049	1.048	1.044	0.946269	0.164085	1.09779	0.0117175	1.03881	0.186757
F1PQ43	Acidic leucine-rich nuclear phosphoprotein 32 family member A	54.1126	13	6	231	26.4	3.99	1.005	0.995	0.931	0.977	1.03	0.966	1.065	1.02033	1.033	0.993	0.981	1.00233	1.04435	0.307829	0.982359	0.614152	1.02593	0.416879
F1PCH3	Uncharacterized protein	54.0793	20	14	429	46.8	8.78	1.013	0.995	1.049	1.019	0.98	0.952	1.003	0.978333	1.024	0.989	0.995	1.00267	0.960092	0.133756	1.02487	0.253982	0.983971	0.442944
E2R3J1	Uncharacterized protein	54.0541	19	8	407	46.4	5.48	1.043	0.996	1.198	1.079	1.043	0.874	0.895	0.937333	0.967	1.029	0.955	0.983667	0.868706	0.154996	1.04943	0.468499	0.911647	0.21747
F1PCG4	Uncharacterized protein	54.0404	10	9	198	21.9	5.43	0.968	0.993	0.971	0.977333	1.005	0.991	0.994	0.996667	1.075	0.987	1.015	1.02567	1.01978	0.0970481	1.0291	0.332115	1.04945	0.149384
E2RJF7	Sulfurtransferase	54.0268	13	12	298	33.1	6.46	0.949	0.93	0.959	0.946	1.091	0.992	1.07	1.051	1.04	0.972	0.997	1.003	1.11099	0.0284301	0.954329	0.254108	1.06025	0.0576655
F1P7V6	Uncharacterized protein	53.945	32	32	545	62.7	7.12	1.077	0.979	1.024	1.02667	0.968	0.955	0.989	0.970667	1.007	1.001	1	1.00267	0.945455	0.135388	1.03297	0.0343566	0.976623	0.445742
P63050	Ubiquitin-60S ribosomal protein L40	53.9062	8	1	128	14.7	9.83	1.129	0.793	0.772	0.898	1.022	0.772	1.017	0.937	1.118	1.331	1.047	1.16533	1.04343	0.797292	1.24369	0.126744	1.2977	0.136406
E2RCQ9	S-formylglutathione hydrolase	53.9007	12	12	282	31.4	6.83	0.983	1.059	0.945	0.995667	1.034	0.961	1.014	1.003	1.046	0.936	1.022	1.00133	1.00737	0.863347	0.998338	0.968658	1.00569	0.910434
E2R1M6	Uncharacterized protein	53.8462	6	6	130	14.5	5.78	0.93	0.968	0.983	0.960333	1.098	1.021	1.028	1.049	1.029	0.967	0.976	0.990667	1.09233	0.0385647	0.944391	0.135634	1.03159	0.291046
E2R4N7	40S ribosomal protein S12	53.7879	7	7	132	14.5	7.21	0.986	0.955	0.999	0.98	1.03	0.896	0.996	0.974	1.034	1.061	1.044	1.04633	0.993878	0.894013	1.07426	0.152318	1.06769	0.0121492
J9NU88	Uncharacterized protein	53.7736	6	5	106	11.9	9.72	0.958	0.853	1.101	0.970667	0.992	0.819	0.969	0.926667	1.058	1.14	1.11	1.10267	0.95467	0.650662	1.18993	0.0412172	1.13599	0.156399
F1PLP2	Cytochrome b-c1 complex subunit 7	53.7736	8	8	106	13.1	9.11	0.909	0.956	0.871	0.912	0.937	1.054	1.037	1.00933	1.096	1.049	1.091	1.07867	1.10673	0.0914358	1.06869	0.153454	1.18275	0.00440153
E2RSU6	Uncharacterized protein	53.719	6	5	121	13.4	7.24	0.998	0.982	1.061	1.01367	1.025	1.025	1.054	1.03467	0.962	0.985	0.909	0.952	1.02072	0.464218	0.920103	0.0279019	0.939165	0.134872
J9NVP2	Stathmin	53.6913	9	9	149	17.3	5.97	1.056	1.027	1.03	1.03767	1.035	0.968	1.075	1.026	1	0.906	0.902	0.936	0.988757	0.738097	0.912281	0.114455	0.902024	0.0379772
J9NSE8	Uncharacterized protein	53.6797	13	13	231	25	4.6	0.95	1.029	0.986	0.988333	1.079	1.01	1.059	1.04933	0.993	0.963	0.931	0.962333	1.06172	0.117725	0.91709	0.0329956	0.973693	0.420864
F1PHX2	Uncharacterized protein	53.662	31	31	710	80.7	6.07	1.037	1.034	1.002	1.02433	1.026	0.983	0.995	1.00133	0.985	0.969	0.969	0.974333	0.977546	0.24787	0.973036	0.123559	0.951188	0.0157262
E2RNQ2	Tubulin alpha chain	53.6204	21	1	511	56.7	5.15	0.944	0.866	1.294	1.03467	1.077	0.879	0.978	0.978	0.953	1.021	0.988	0.987333	0.945232	0.713045	1.00954	0.884746	0.954253	0.740017
Q95MP7	Ferritin heavy chain	53.5519	8	8	183	21.3	5.88	0.685	0.688	0.815	0.729333	1.348	1.236	1.127	1.237	1.093	1.017	0.991	1.03367	1.69607	0.00272142	0.835624	0.0453031	1.41728	0.00444905
J9NWL3	Uncharacterized protein	53.4483	3	3	58	6.6	4.54	0.874	0.978	0.874	0.908667	1.064	1.138	1.081	1.09433	0.964	1.017	1.009	0.996667	1.20433	0.0108251	0.910752	0.0246034	1.09685	0.0836552
E2RKJ6	Uncharacterized protein	53.4392	20	19	378	42.8	7.31	1.064	0.949	1.002	1.005	1.072	1.005	0.976	1.01767	0.96	0.999	0.973	0.977333	1.0126	0.78648	0.960367	0.258574	0.972471	0.475281
J9P014	Uncharacterized protein	53.4161	28	22	644	67.5	7.61	1.014	1.004	1.021	1.013	0.992	1.009	0.968	0.989667	0.993	0.995	1.003	0.997	0.976966	0.144173	1.00741	0.582525	0.984205	0.0509788
L7N0D0	Serine/threonine-protein phosphatase	53.3333	15	3	330	37.5	6.33	1.029	1.064	1.027	1.04	0.97	0.965	0.973	0.969333	1.001	0.978	0.993	0.990667	0.932051	0.00446664	1.02201	0.0403173	0.952564	0.0231447
E2R5P5	Protein S100	53.3333	5	4	90	10	5.48	0.986	1.023	0.942	0.983667	1.054	0.956	1.027	1.01233	1.042	0.973	0.996	1.00367	1.02914	0.486624	0.991439	0.81951	1.02033	0.553679
Q5TJE9	40S ribosomal protein S18	53.2895	11	11	152	17.7	10.99	0.953	0.988	0.952	0.964333	1.001	1.004	0.987	0.997333	1.047	1.033	1.036	1.03867	1.03422	0.0633471	1.04144	0.0036018	1.07708	0.00410469
P41148	Endoplasmin	53.2338	41	40	804	92.5	4.87	0.953	0.956	0.996	0.968333	1	0.965	0.989	0.984667	1.029	1.054	1.058	1.047	1.01687	0.398278	1.0633	0.0105552	1.08124	0.0089803
E2QTC7	Uncharacterized protein	53.2258	20	19	372	41.2	7.65	1.005	0.997	0.939	0.980333	1.016	1.051	0.985	1.01733	0.988	1.002	1.017	1.00233	1.03774	0.259895	0.985256	0.511135	1.02244	0.381976
F6XEV4	Uncharacterized protein	53.1746	10	10	252	26.8	5.76	1.062	1.011	1.006	1.02633	0.977	0.883	1.005	0.955	1.055	0.995	1.005	1.01833	0.930497	0.15691	1.06632	0.199941	0.992205	0.771807
E2QV08	Malate dehydrogenase	53.1609	21	20	348	38.2	7.94	1.044	1.045	0.956	1.015	1.014	1.018	1.004	1.012	0.997	0.968	0.952	0.972333	0.997044	0.92464	0.960804	0.0453839	0.957964	0.257112
E2R1R4	Uncharacterized protein	53.0973	12	12	226	26.2	8.43	1.019	1.03	1.007	1.01867	0.993	0.94	0.978	0.970333	1.037	0.988	1.008	1.011	0.952552	0.0476246	1.04191	0.128053	0.992474	0.650853
E2RH91	Uncharacterized protein	53.0769	40	40	910	101.9	7.17	1.01	1.033	1.026	1.023	0.996	0.988	0.989	0.991	0.995	0.983	0.981	0.986333	0.968719	0.0116058	0.995291	0.407251	0.964158	0.0105574
E2RQC9	RuvB-like helicase	53.0702	19	19	456	50.2	6.42	1.006	1.012	0.986	1.00133	1.041	1.009	0.998	1.016	0.989	0.98	0.979	0.982667	1.01465	0.386494	0.967192	0.0660977	0.981358	0.0924889
F1PU47	Uncharacterized protein	53.0466	14	14	279	32.1	7.64	1.187	0.927	1.09	1.068	0.928	0.715	0.901	0.848	1.005	1.163	1.084	1.084	0.794007	0.0953451	1.2783	0.0435445	1.01498	0.865343
E2QXF3	60S ribosomal protein L15	52.9412	11	11	204	24.1	11.62	0.96	0.982	0.956	0.966	0.845	1.01	0.991	0.948667	1.114	1.066	1.075	1.085	0.982057	0.758927	1.14371	0.0655639	1.12319	0.00209826
F2Z4N3	60S ribosomal protein L27	52.9412	8	8	136	15.8	10.56	0.958	0.974	1.069	1.00033	0.879	0.88	0.955	0.904667	1.159	0.991	1.136	1.09533	0.904365	0.0891983	1.21076	0.0307764	1.09497	0.205899
E2RNV4	Uncharacterized protein	52.9101	8	8	189	21	5.44	1.028	1.076	0.94	1.01467	1.051	1.017	1.019	1.029	1.011	0.897	0.963	0.957	1.01413	0.746141	0.930029	0.107594	0.943167	0.327551
E2RHY7	Uncharacterized protein	52.8708	20	1	418	46.6	8.75	1.15	1.284	1.078	1.17067	0.91	0.976	0.956	0.947333	0.874	0.828	0.944	0.882	0.809226	0.024444	0.931034	0.168996	0.753417	0.013974
C7C419	Serpin peptidase inhibitor, clade H (Heat shock protein 47), member 1, (Collagen binding protein 1)	52.8708	20	1	418	46.6	8.75	1.034	1.07	0.98	1.028	0.941	0.981	0.975	0.965667	1.029	0.986	1.004	1.00633	0.939364	0.0977792	1.04211	0.0822449	0.978923	0.496138
E2RB38	Uncharacterized protein	52.8226	19	7	248	28.9	4.75	0.918	0.965	0.994	0.959	0.979	1.011	1.005	0.998333	1.045	1.014	1.069	1.04267	1.04101	0.179748	1.04441	0.0768132	1.08724	0.037372
E2R2M7	Uncharacterized protein	52.7174	10	4	184	21	6.67	1.092	1.023	1.015	1.04333	1.02	0.862	1.06	0.980667	0.979	0.951	0.998	0.976	0.939936	0.390917	0.995241	0.943586	0.935463	0.0739461
E2RT55	Uncharacterized protein	52.7094	17	16	406	46.2	5.83	1.004	0.979	0.984	0.989	1.004	1.009	1.027	1.01333	1.002	1.001	0.989	0.997333	1.0246	0.0784149	0.984211	0.1207	1.00843	0.392627
E2RRQ7	Uncharacterized protein	52.6912	34	31	706	78.2	8.16	1.025	1.022	1.124	1.057	0.944	0.93	0.909	0.927667	0.985	1.027	1.034	1.01533	0.877641	0.0209624	1.0945	0.00882986	0.96058	0.321253
F1PQM1	Purine nucleoside phosphorylase	52.5952	11	11	289	32.3	6.87	1.019	0.96	1.059	1.01267	1.03	0.94	0.996	0.988667	1.028	0.976	0.993	0.999	0.9763	0.570888	1.01045	0.750844	0.986504	0.696368
E2RLQ2	Uncharacterized protein	52.5773	12	11	291	31.6	8.35	1.027	0.968	0.972	0.989	0.97	0.94	1.05	0.986667	1.021	1.038	1.014	1.02433	0.997641	0.953922	1.03818	0.324951	1.03573	0.157131
F1P9Z4	Uncharacterized protein	52.5714	9	8	175	20.6	5.71	0.92	0.931	0.894	0.915	1.069	1.087	0.979	1.045	1.013	1.105	1.003	1.04033	1.14208	0.0208862	0.995534	0.925019	1.13698	0.0216235
F1Q249	Uncharacterized protein	52.5253	5	5	99	11.2	5.5	1.017	0.925	0.949	0.963667	0.912	0.983	1.094	0.996333	1.002	1.044	1.073	1.03967	1.0339	0.613341	1.04349	0.488237	1.07887	0.0917477
E2RMR3	Uncharacterized protein	52.4899	39	39	743	78.9	9.16	1.087	0.948	1.164	1.06633	0.941	0.834	0.994	0.923	1.004	1.006	1.022	1.01067	0.865583	0.143043	1.09498	0.138069	0.947796	0.429911
E2R4H4	Proteasome endopeptidase complex	52.459	7	7	183	20	4.73	0.883	0.949	1.024	0.952	1.072	0.995	1.021	1.02933	1.021	1.019	1.016	1.01867	1.08123	0.172264	0.989637	0.662382	1.07003	0.177238
P38400	Guanine nucleotide-binding protein G(i) subunit alpha-2	52.3944	14	7	355	40.5	5.38	1.166	1.006	1.073	1.08167	1.039	0.954	0.959	0.984	0.915	0.955	0.934	0.934667	0.909707	0.144486	0.949864	0.173877	0.864099	0.0371178
J9P0A6	Uncharacterized protein	52.3161	14	14	367	40.5	8.9	1.058	1.043	1.052	1.051	1.051	1.041	1.042	1.04467	0.886	0.908	0.92	0.904667	0.993974	0.305585	0.865986	0.000179596	0.860768	0.000176018
E2RE36	Uncharacterized protein	52.2907	29	21	633	70.9	8.13	0.967	1.002	0.965	0.978	0.973	0.956	1.023	0.984	1.049	1.02	1.045	1.038	1.00613	0.810468	1.05488	0.0706115	1.06135	0.0163292
F1Q2A2	Uncharacterized protein	52.2727	16	16	440	48.4	6.9	1.02	1.079	1.064	1.05433	1.017	0.951	0.978	0.982	0.945	0.97	0.977	0.964	0.931394	0.0501792	0.98167	0.449164	0.914322	0.0110459
F1PUT4	Uncharacterized protein	52.2673	24	21	419	48.1	6.68	1.005	0.991	0.968	0.988	1.032	1.038	1.023	1.031	0.981	0.989	0.972	0.980667	1.04352	0.0209032	0.95118	0.0015566	0.992578	0.569549
F1P9Y5	Uncharacterized protein	52.2267	7	7	247	26.9	5.1	1	1.014	0.938	0.984	0.904	1.038	1.025	0.989	1.063	1.009	1.011	1.02767	1.00508	0.923069	1.0391	0.449551	1.04438	0.210237
E2R8A8	Uncharacterized protein	52.2222	9	9	180	20.6	10.29	0.937	0.984	1	0.973667	1.091	0.989	0.967	1.01567	1.018	0.989	1.025	1.01067	1.04314	0.380203	0.995077	0.905985	1.038	0.166143
F1P7M0	Uncharacterized protein	52.2093	38	38	860	96.9	5.53	1.015	1.027	0.997	1.013	0.972	0.988	0.988	0.982667	1.038	0.988	0.987	1.00433	0.970056	0.0412222	1.02205	0.287152	0.991445	0.671305
J9NT20	Obg-like ATPase 1	52.1519	17	17	395	44.6	8.06	0.962	0.995	0.968	0.975	1.031	1.027	0.997	1.01833	1.019	0.992	1.01	1.007	1.04444	0.0426367	0.988871	0.443604	1.03282	0.0679425
F1PFG6	Uncharacterized protein	52.1289	34	34	869	96.1	6.35	1.104	1.042	1.037	1.061	0.98	0.968	0.996	0.981333	0.957	0.959	0.958	0.958	0.924914	0.0258146	0.976223	0.0454814	0.902922	0.00878696
F6X7L0	Uncharacterized protein	52.1127	21	2	284	32.7	4.74	0.977	0.957	0.956	0.963333	1.004	1.054	1.021	1.02633	0.988	1.027	1.014	1.00967	1.0654	0.0176831	0.983761	0.421444	1.0481	0.0255682
A0M8V0	F-actin-capping protein subunit alpha-2	52.0979	11	9	286	33	5.85	0.934	1.004	0.981	0.973	0.954	1.151	0.981	1.02867	0.977	1.042	0.975	0.998	1.05721	0.440116	0.970188	0.663883	1.02569	0.453531
P60467	Protein transport protein Sec61 subunit beta	52.0833	5	5	96	10	11.56	1.172	0.896	0.945	1.00433	0.876	0.973	1.028	0.959	0.981	1.066	1.062	1.03633	0.954862	0.66115	1.08064	0.213711	1.03186	0.738516
J9P7I4	Trifunctional purine biosynthetic protein adenosine-3	52.0277	39	39	1011	108.2	6.67	0.987	0.985	0.993	0.988333	1.025	0.996	0.989	1.00333	1.01	1	1.015	1.00833	1.01518	0.254326	1.00498	0.695228	1.02024	0.0163691
E2RAA0	Uncharacterized protein	51.9685	18	18	381	41.7	8.21	1.297	1.017	1.125	1.14633	0.815	0.99	1.181	0.995333	0.503	1.066	1.007	0.858667	0.868276	0.321179	0.862693	0.54624	0.749055	0.216808
F1PS73	Uncharacterized protein	51.9481	3	3	77	9	8.43	0.963	0.985	0.976	0.974667	0.991	0.967	1.026	0.994667	1.112	0.993	0.989	1.03133	1.02052	0.33542	1.03686	0.449956	1.05814	0.237692
F6V659	Uncharacterized protein	51.8919	30	30	740	82.4	7.23	1.009	1.013	0.973	0.998333	0.989	1.024	1.002	1.005	1.007	0.985	0.998	0.996667	1.00668	0.703712	0.991708	0.527133	0.998331	0.912421
E2R4R3	mRNA cap guanine-N7 methyltransferase	51.8828	20	20	478	55.2	5.44	0.972	0.995	0.919	0.962	1.071	0.984	1.07	1.04167	1.012	0.981	0.996	0.996333	1.08281	0.0949423	0.95648	0.207631	1.03569	0.229237
J9NYN2	Uncharacterized protein	51.8135	8	8	193	20.6	8.57	1.005	0.801	1.021	0.942333	1.095	0.826	1.032	0.984333	0.961	1.156	1.104	1.07367	1.04457	0.716592	1.09076	0.422102	1.13937	0.225468
E2RQS7	Peptidylprolyl isomerase	51.7857	10	10	224	25.2	9.2	1	0.977	0.98	0.985667	1.033	1.032	1.012	1.02567	1.005	0.987	0.973	0.988333	1.04058	0.0158328	0.963601	0.0315951	1.00271	0.831486
E2RGR9	Uncharacterized protein	51.7717	20	20	508	54.4	9	1.021	0.987	0.977	0.995	1.007	0.942	1.016	0.988333	1.04	1.004	1.008	1.01733	0.9933	0.816116	1.02934	0.326298	1.02245	0.271524
E2RD65	Actin-related protein 2/3 complex subunit 5	51.7544	6	6	114	12.1	9.79	1.062	0.996	0.969	1.009	0.998	1.005	0.99	0.997667	0.972	0.997	1.011	0.993333	0.988768	0.705973	0.995657	0.740424	0.984473	0.627824
F1PUX4	60S acidic ribosomal protein P0	51.735	13	11	317	34.3	5.97	0.942	0.967	0.925	0.944667	1.008	1.031	0.992	1.01033	1.031	1.056	1.047	1.04467	1.06951	0.01687	1.03398	0.0634352	1.10586	0.00215484
F6Y5Z5	Uncharacterized protein	51.7241	14	11	290	32.7	5.49	1.028	1.042	0.965	1.01167	0.983	1.027	0.996	1.002	0.988	0.983	0.988	0.986333	0.990445	0.738777	0.984365	0.29959	0.974959	0.346032
A0A1B1X469	ATP synthase subunit alpha	51.7179	27	26	553	59.7	9.19	0.956	0.977	0.983	0.972	0.956	1.033	1.007	0.998667	1.043	1.023	1.023	1.02967	1.02743	0.329706	1.03104	0.258884	1.05933	0.00546103
J9P9G4	Proteasome subunit alpha type	51.711	13	2	263	29.3	6.61	1.06	1.026	1.009	1.03167	0.907	1.048	1.016	0.990333	0.985	0.987	0.962	0.978	0.959935	0.412547	0.987546	0.790497	0.947981	0.0343072
F1PNB8	Uncharacterized protein	51.5823	13	13	316	35.7	6.98	0.97	1.01	0.919	0.966333	0.916	1.039	1.019	0.991333	1.063	0.999	1.064	1.042	1.02587	0.618032	1.05111	0.311304	1.0783	0.0900396
E2RMW3	Uncharacterized protein	51.3889	8	8	144	17	8.82	0.953	1.042	1.044	1.013	0.997	1.021	0.991	1.003	0.968	0.97	1.016	0.984667	0.990128	0.765877	0.981722	0.369818	0.97203	0.449725
E2QUU1	Eukaryotic translation initiation factor 3 subunit J	51.3514	13	13	259	29.1	4.83	0.975	0.932	0.977	0.961333	1.021	1	0.999	1.00667	1.022	1.042	1.032	1.032	1.04716	0.0500775	1.02517	0.0513014	1.07351	0.0109872
F1PRL5	Uncharacterized protein	51.3423	16	7	298	33	9.77	0.962	0.927	0.991	0.96	1.026	1.008	1.017	1.017	1.012	1.029	1.027	1.02267	1.05937	0.0413093	1.00557	0.490255	1.06528	0.0312868
E2R837	Uncharacterized protein	51.25	26	26	640	71.2	5.33	0.994	0.963	0.98	0.979	0.995	0.956	1.003	0.984667	1.032	1.039	1.037	1.036	1.00579	0.756471	1.05213	0.0248962	1.05822	0.00345269
F6XIK8	Uncharacterized protein	51.2456	27	20	562	62.6	7.56	0.928	0.974	0.948	0.95	1.028	1.011	0.984	1.00767	1.042	1.047	1.039	1.04267	1.0607	0.0354994	1.03473	0.0547777	1.09754	0.0023717
F1PHI4	Aminoacylase	51.2255	14	14	408	45.4	5.99	0.99	1.059	0.994	1.01433	0.99	1.007	0.987	0.994667	0.993	0.953	1.028	0.991333	0.980611	0.444603	0.996649	0.889607	0.977325	0.501112
F1PX67	Uncharacterized protein	51.1737	15	1	213	21.4	11.08	0.779	0.972	1.014	0.921667	0.792	1.002	1.005	0.933	1.163	1.139	1.133	1.145	1.0123	0.916084	1.22722	0.0406673	1.24231	0.0375811
E2R7R1	Uncharacterized protein	51.1494	7	7	174	19	7.27	1.064	1.131	1.015	1.07	0.835	0.942	0.919	0.898667	1.166	0.967	0.961	1.03133	0.839875	0.0215228	1.14763	0.150779	0.963863	0.634576
E2R507	Uncharacterized protein	51.1278	9	9	133	14.8	6.79	1.13	1.029	0.939	1.03267	0.986	0.903	1.082	0.990333	1.006	0.991	0.934	0.977	0.959006	0.605465	0.986537	0.824048	0.946094	0.401501
J9NZA6	Uncharacterized protein	51.1111	7	1	135	15.7	10.92	1.004	0.615	0.978	0.865667	0.977	2.168	0.799	1.31467	0.454	1.016	0.989	0.819667	1.51868	0.372671	0.623479	0.349008	0.946862	0.845922
E2RKA8	60S ribosomal protein L32	51.1111	7	1	135	15.9	11.33	0.744	1.013	1.008	0.921667	0.864	0.914	0.988	0.922	1.188	1.231	1.049	1.156	1.00036	0.997392	1.2538	0.0235267	1.25425	0.0882787
E2R1A6	Cytochrome b-c1 complex subunit Rieske, mitochondrial	51.0949	11	11	274	29.4	8.9	0.863	0.994	0.888	0.915	1.059	1.041	1.021	1.04033	1.075	1.008	1.051	1.04467	1.13698	0.0395157	1.00417	0.856424	1.14171	0.0440289
F1PWN6	Uncharacterized protein	51.0811	17	17	370	40.5	5.19	1.061	1.036	0.927	1.008	0.999	1.042	1.008	1.01633	1.005	0.966	0.956	0.975667	1.00827	0.856341	0.959987	0.110133	0.967923	0.501078
F1PU09	Uncharacterized protein	51.0516	19	19	523	58.8	5.73	0.934	0.956	0.977	0.955667	1.057	1.034	1.032	1.041	0.986	1.027	0.997	1.00333	1.08929	0.00446824	0.963817	0.0618367	1.04988	0.052288
E2R764	Uncharacterized protein	51.0417	3	3	96	11	7.25	0.961	1.01	1.042	1.00433	1.105	1.089	0.988	1.06067	0.916	0.995	0.894	0.935	1.05609	0.265428	0.881521	0.0581391	0.930966	0.147417
F1PYV1	Uncharacterized protein	50.9664	47	46	983	106.2	7.44	1.031	1.038	1.058	1.04233	0.97	0.971	0.967	0.969333	1.011	0.966	0.988	0.988333	0.929965	0.00087111	1.0196	0.21903	0.948193	0.0242652
E2RJ06	40S ribosomal protein SA	50.9554	14	14	314	35	4.88	0.92	0.968	0.946	0.944667	1.001	1.108	0.976	1.02833	1.002	1.071	1.008	1.027	1.08857	0.122232	0.998703	0.978315	1.08716	0.0342291
E2R0X3	Uncharacterized protein	50.9434	14	7	318	34.8	6.61	1.007	0.996	1.049	1.01733	0.968	0.944	0.981	0.964333	1.024	1.012	1.019	1.01833	0.947903	0.0527019	1.056	0.00900908	1.00098	0.954633
E2RPY9	Uncharacterized protein	50.9363	14	14	267	31	5.95	0.972	1.01	0.973	0.985	1.06	1.034	0.995	1.02967	0.959	1.018	0.979	0.985333	1.04535	0.119913	0.956944	0.158728	1.00034	0.988299
F1P719	Uncharacterized protein	50.8318	22	18	541	61.2	6.76	0.966	1.003	0.984	0.984333	1.045	1.03	0.969	1.01467	0.958	1.025	1.021	1.00133	1.03082	0.301283	0.986859	0.696495	1.01727	0.520856
J9P556	NADH dehydrogenase [ubiquinone] iron-sulfur protein 6, mitochondrial	50.8065	4	4	124	13.5	8.6	1.047	0.966	1.075	1.02933	0.993	0.902	1.042	0.979	1.062	0.955	0.958	0.991667	0.951101	0.391535	1.01294	0.826172	0.963407	0.476624
J9NU37	Uncharacterized protein	50.7982	85	50	1754	204.3	5.6	1.067	1.103	1.004	1.058	0.937	0.932	0.967	0.945333	1.061	0.958	0.971	0.996667	0.89351	0.0219054	1.0543	0.207537	0.942029	0.230699
E2R667	Uncharacterized protein	50.7726	35	35	906	102.3	5.3	1.041	1.039	0.999	1.02633	0.969	0.98	0.98	0.976333	1.02	0.983	0.988	0.997	0.951283	0.0242167	1.02117	0.164342	0.971419	0.17716
J9NTN4	Uncharacterized protein	50.7463	7	7	201	22.4	7.01	0.993	1.007	0.942	0.980667	1.038	0.983	1.023	1.01467	1.076	0.95	0.987	1.00433	1.03467	0.256127	0.989816	0.812705	1.02413	0.605566
E2R2M6	Uncharacterized protein	50.6887	12	12	363	39.6	7.56	1.047	1.036	1.022	1.035	1.047	1.034	1.024	1.035	0.924	0.92	0.945	0.929667	1	1	0.898229	0.0004999	0.898229	0.000576735
E2RMN6	Uncharacterized protein	50.6143	21	21	407	44.7	8.54	0.96	1.021	1.01	0.997	1.077	1.02	1.062	1.053	0.928	0.975	0.947	0.95	1.05617	0.0918455	0.902184	0.00920965	0.952859	0.112846
E2RDN1	Phosphoserine aminotransferase	50.6083	18	18	411	45.2	9.38	0.989	0.957	0.96	0.968667	1.023	0.988	1.011	1.00733	1.036	1.033	1.003	1.024	1.03992	0.0557432	1.01655	0.320575	1.05712	0.0195583
F1PA22	Profilin	50.5495	4	4	91	9.8	9.36	1.016	0.944	1.147	1.03567	1.114	0.96	0.992	1.022	0.925	0.942	0.96	0.942333	0.986804	0.865527	0.922048	0.172268	0.909881	0.196422
E2R134	Uncharacterized protein	50.5285	19	19	473	52.6	5.67	1	0.953	1.055	1.00267	1.039	0.944	0.997	0.993333	1.004	1.001	1.006	1.00367	0.990691	0.828224	1.0104	0.726398	1.001	0.974592
E2QXI3	Uncharacterized protein	50.4673	12	11	321	35.4	8.5	0.934	0.981	0.961	0.958667	1.065	1.073	1	1.046	1	0.993	0.994	0.995667	1.0911	0.0312213	0.95188	0.0960478	1.0386	0.0550742
E2RAZ6	GrpE protein homolog	50.4348	11	11	230	25.5	8.29	0.968	0.974	0.947	0.963	0.991	1.029	0.999	1.00633	0.997	1.047	1.049	1.031	1.045	0.0377252	1.02451	0.296638	1.07061	0.0227115
F1PEK5	Uncharacterized protein	50.4249	14	14	353	40.6	6.35	1.026	0.995	1.036	1.019	1.011	0.981	0.996	0.996	1.001	0.981	0.973	0.985	0.977429	0.201842	0.988956	0.411677	0.966634	0.0844464
F1P7L2	Uncharacterized protein	50.3984	20	2	502	55.8	5.34	1.009	1	0.931	0.98	1.03	1.049	1.01	1.02967	1	0.982	0.988	0.99	1.05068	0.140654	0.961476	0.0332673	1.0102	0.711749
J9P3M1	Uncharacterized protein	50.3817	13	13	262	29.8	6.79	1.054	1.08	1.048	1.06067	0.954	1.017	0.989	0.986667	0.977	0.956	0.925	0.952667	0.930233	0.0232796	0.965541	0.224219	0.898177	0.00389475
Q8WNN6	Superoxide dismutase [Cu-Zn]	50.3268	5	1	153	15.9	6.11	1.01	0.934	0.979	0.974333	1.043	1.036	0.999	1.026	1.023	0.983	0.993	0.999667	1.05303	0.117258	0.974334	0.221212	1.026	0.370341
J9P425	Uncharacterized protein	50.3268	9	9	153	17	10.32	0.959	1.014	0.985	0.986	0.987	1.001	0.964	0.984	1.052	0.992	1.045	1.02967	0.997972	0.922054	1.04641	0.10423	1.04429	0.152076
J9P1J5	Uncharacterized protein	50.2825	9	8	177	19.9	6.55	1.07	0.958	0.998	1.00867	1.004	0.907	1.057	0.989333	0.986	1.023	0.995	1.00133	0.980833	0.742026	1.01213	0.804213	0.99273	0.842558
F6XY66	Transforming protein RhoA	50.2591	8	3	193	21.8	6.1	0.982	0.928	1.16	1.02333	0.981	1.009	1.073	1.021	0.942	0.968	0.957	0.955667	0.99772	0.976731	0.93601	0.0817971	0.933876	0.391459
E2RJU3	Uncharacterized protein	50.2326	21	21	430	49	5.58	0.976	0.919	1.057	0.984	1.048	0.976	1.01	1.01133	0.924	1.072	1.018	1.00467	1.02778	0.577313	0.993408	0.89621	1.021	0.743506
E2RI17	Uncharacterized protein	50.2262	10	10	221	24.2	8.98	1.043	0.935	0.998	0.992	1.232	0.814	1.033	1.02633	1.03	0.942	0.974	0.982	1.03461	0.796717	0.956804	0.737602	0.989919	0.817243
F1Q3Z6	Uncharacterized protein	50.1742	39	35	861	97.5	5.58	1.053	0.969	1.063	1.02833	1.011	0.897	0.977	0.961667	0.998	1.009	1.024	1.01033	0.93517	0.213082	1.05061	0.23252	0.982496	0.58967
E2R7H9	Uncharacterized protein	50.1312	15	13	381	43.8	5.94	1.087	1.089	1.118	1.098	0.905	0.959	0.828	0.897333	0.913	1.081	1.021	1.005	0.817243	0.00695835	1.11999	0.158167	0.915301	0.137359
E2RQ08	Dolichyl-diphosphooligosaccharide--protein glycosyltransferase subunit 1	50.0824	30	30	607	68.5	6.42	1.038	1.033	0.98	1.017	0.97	0.983	1.001	0.984667	1.015	0.972	1.008	0.998333	0.968207	0.191911	1.01388	0.44297	0.981645	0.459696
E2RBG1	Uncharacterized protein	50	12	5	318	34.8	6.98	1.102	1.008	0.98	1.03	0.893	0.944	1.062	0.966333	0.983	1.015	1.013	1.00367	0.938188	0.363745	1.03863	0.50557	0.974434	0.529733
J9NYL5	Uncharacterized protein	50	7	7	130	15	10.54	0.986	1.011	0.939	0.978667	0.917	0.982	1.015	0.971333	1.08	1.028	1.042	1.05	0.992507	0.847262	1.08099	0.0739715	1.07289	0.0528788
E2RLA2	Uncharacterized protein	50	21	21	534	61	6.01	0.978	1.007	1.013	0.999333	0.95	0.946	1.008	0.968	1.066	1.001	1.031	1.03267	0.968646	0.240678	1.0668	0.0781008	1.03336	0.198806
E2RTH5	Uncharacterized protein	50	3	3	64	7.4	9.52	0.961	0.932	0.9	0.931	0.97	1.036	1.137	1.04767	1.006	1.092	0.966	1.02133	1.12531	0.0868256	0.974865	0.688945	1.09703	0.0930662
J9PAS6	Uncharacterized protein	50	5	5	144	16.1	9.85	0.959	1.068	0.918	0.981667	1.011	0.875	1.153	1.013	1.136	0.838	1.041	1.005	1.03192	0.750285	0.992103	0.949636	1.02377	0.824607
J9NV93	Peptidyl-prolyl cis-trans isomerase	50	9	2	154	16.7	8.29	0.901	0.954	0.991	0.948667	1.057	1.149	0.987	1.06433	0.988	0.985	0.988	0.987	1.12193	0.097503	0.927341	0.174655	1.04041	0.216358
E2RPG9	Coatomer subunit gamma	49.8856	31	29	874	97.7	5.41	0.996	0.97	1.067	1.011	1.006	0.925	0.984	0.971667	1.001	1.017	1.033	1.017	0.961095	0.356277	1.04666	0.154793	1.00593	0.85328
F6UXI8	Inosine-5'-monophosphate dehydrogenase	49.7959	22	20	490	53	6.86	1.042	1.017	1.076	1.045	1.012	0.989	0.987	0.996	0.938	0.969	0.97	0.959	0.95311	0.0603926	0.962851	0.0488312	0.917703	0.0127893
F6UY11	Uncharacterized protein	49.7854	12	12	233	26.9	5.78	1.016	0.981	0.976	0.991	1.002	0.983	1.034	1.00633	1.04	0.975	0.993	1.00267	1.01547	0.47539	0.996356	0.887965	1.01177	0.640131
J9P9U7	Uncharacterized protein	49.7717	15	4	219	21.9	11.11	0.838	0.883	0.876	0.865667	0.885	0.99	1.017	0.964	1.265	1.096	1.15	1.17033	1.11359	0.0822829	1.21404	0.0322609	1.35194	0.00416391
F1PVZ2	Uncharacterized protein	49.763	22	22	422	47.3	10.98	0.968	0.974	0.975	0.972333	0.964	0.926	1.037	0.975667	1.078	1.026	1.051	1.05167	1.00343	0.923579	1.0779	0.101443	1.08159	0.00638997
W8E7Z7	MHC class I antigen (Fragment)	49.7238	8	0	181	20.8	5.47	1.682	1.754	1.51	1.64867	0.787	0.806	0.684	0.759	0.551	0.621	0.605	0.592333	0.460372	0.000403804	0.780413	0.0184752	0.35928	0.000150724
E2RA48	Uncharacterized protein	49.7238	21	21	543	58.2	5.35	0.991	1.016	1.05	1.019	0.969	1.044	0.981	0.998	0.97	0.993	0.986	0.983	0.979392	0.507238	0.98497	0.569464	0.964671	0.122084
E2R702	Uncharacterized protein	49.6296	6	6	135	15.3	9.61	0.881	0.9	0.911	0.897333	1.081	1.065	1.083	1.07633	1.005	1.023	1.052	1.02667	1.19948	6.81641e-05	0.953856	0.0285855	1.14413	0.00135159
J9P9Z7	Uncharacterized protein	49.5798	6	6	119	13.4	9.94	1.005	0.955	0.933	0.964333	1.08	0.902	0.997	0.993	1.035	1.037	1.055	1.04233	1.02973	0.633689	1.04968	0.394957	1.08088	0.0247032
E2RRD2	Uncharacterized protein	49.5413	16	2	218	23	12.03	0.914	0.909	0.882	0.901667	0.94	0.998	1.026	0.988	1.207	1.037	1.087	1.11033	1.09575	0.0337465	1.12382	0.0960904	1.23142	0.0153652
E2RQE7	Uncharacterized protein	49.4915	12	12	295	33.2	5.35	0.993	1.047	1.014	1.018	0.991	1.064	0.982	1.01233	0.963	0.979	0.965	0.969	0.994434	0.860974	0.957195	0.176661	0.951866	0.0411752
E2RPC9	Uncharacterized protein	49.4845	4	4	97	11	5.16	0.892	0.882	0.908	0.894	1.059	1	1.023	1.02733	1.051	1.112	1.074	1.079	1.14914	0.00207244	1.05029	0.104828	1.20694	0.000665987
F6XIB7	Uncharacterized protein	49.4681	8	8	188	21.2	5.1	0.956	0.932	0.922	0.936667	1.078	1.008	1.079	1.055	1.008	0.999	1.017	1.008	1.12633	0.00983074	0.95545	0.122578	1.07616	0.00327133
J9P092	Uncharacterized protein	49.4565	9	8	184	21.1	7.37	0.948	0.964	1.02	0.977333	1.045	0.969	1.05	1.02133	1.01	0.992	1.002	1.00133	1.04502	0.266548	0.980418	0.495748	1.02456	0.345083
E2RN45	Uncharacterized protein	49.4331	15	15	441	49.9	5.22	1.141	1.069	1.12	1.11	0.876	0.905	0.893	0.891333	0.994	0.977	1.026	0.999	0.803003	0.000680178	1.12079	0.00294379	0.9	0.012548
E2RGI4	Chloride intracellular channel protein	49.4071	11	11	253	28.7	5.44	0.92	0.965	1.044	0.976333	1.065	1.056	1	1.04033	0.973	1.009	0.968	0.983333	1.06555	0.19838	0.94521	0.0771277	1.00717	0.864476
J9NYU5	Histone H2B	49.375	10	2	160	17.9	10.14	0.817	0.96	0.927	0.901333	0.898	0.992	0.981	0.957	1.189	1.06	1.176	1.14167	1.06176	0.348224	1.19296	0.0217998	1.26664	0.0156876
E2RL90	Pyruvate dehydrogenase E1 component subunit alpha	49.2308	17	17	390	43.4	8.06	0.965	1.008	0.985	0.986	1.043	1.055	0.994	1.03067	0.999	0.976	0.974	0.983	1.0453	0.11709	0.953752	0.0787643	0.996957	0.849134
E2QTN0	Kinesin-like protein	49.2212	43	35	963	109.7	6.44	0.983	0.975	0.987	0.981667	1.018	0.996	0.983	0.999	0.998	1.031	1.029	1.01933	1.01766	0.183982	1.02035	0.24091	1.03837	0.0286156
J9P069	Uncharacterized protein	49.1979	8	1	187	20.9	4.36	0.742	0.907	1.1	0.916333	0.986	1.082	1.008	1.02533	1.017	1.08	1.078	1.05833	1.11895	0.367747	1.03218	0.40695	1.15497	0.249523
F1PD65	Uncharacterized protein	49.1803	22	17	488	53.1	7.12	1.101	1.079	1.026	1.06867	0.986	0.967	0.941	0.964667	1.002	0.947	0.951	0.966667	0.902682	0.0157171	1.00207	0.931904	0.904554	0.0230362
E2RHL4	Uncharacterized protein	49.1429	6	6	175	20.1	8.95	1.009	0.936	1.071	1.00533	0.961	0.937	0.943	0.947	1.05	1.057	1.035	1.04733	0.941976	0.215436	1.10595	0.00049324	1.04178	0.348125
A0A140T8E6	Uncharacterized protein	49.0591	27	24	744	81.7	6.14	1.139	1.208	1.177	1.17467	0.892	0.955	0.931	0.926	0.925	0.87	0.903	0.899333	0.788309	0.000784743	0.971202	0.334799	0.765607	0.000421428
F1Q0J0	Uncharacterized protein	49.0476	9	6	210	23.5	6.77	0.93	0.972	1.075	0.992333	0.995	0.969	0.961	0.975	1.055	1.027	1.015	1.03233	0.982533	0.715428	1.0588	0.0216357	1.04031	0.421211
E2RCP9	Uncharacterized protein	49.0088	34	34	908	100.2	5.2	1.023	1.007	1.043	1.02433	0.96	1.002	1.002	0.988	0.992	0.986	0.984	0.987333	0.96453	0.105743	0.999325	0.964817	0.963879	0.0257709
E2REK6	Uncharacterized protein	48.9933	8	8	149	16.8	4.22	0.962	0.961	1.142	1.02167	0.99	0.982	1.014	0.995333	1.015	0.956	0.979	0.983333	0.974225	0.687886	0.987944	0.574924	0.96248	0.573222
E2RPS0	Uncharacterized protein	48.9908	25	25	545	61.4	6.71	0.935	0.98	1.028	0.981	1.011	1.031	0.995	1.01233	1.021	0.996	1.003	1.00667	1.03194	0.337777	0.994402	0.680907	1.02616	0.409116
E2RBM3	Uncharacterized protein	48.9703	20	20	437	49	5.71	0.982	0.952	0.957	0.963667	0.988	0.99	1.005	0.994333	1.043	1.044	1.04	1.04233	1.03182	0.0458802	1.04827	0.000947947	1.08163	0.00109563
E2QXE0	Serine/threonine-protein phosphatase	48.9614	14	2	337	38.5	6.13	1.045	1.044	0.976	1.02167	0.852	1.149	0.982	0.994333	0.943	0.986	1.025	0.984667	0.973246	0.773932	0.990278	0.918884	0.963785	0.323633
E2R3G3	Protein-L-isoaspartate O-methyltransferase	48.951	10	10	286	30.3	6.61	1.015	0.984	0.986	0.995	1.051	1.022	1.004	1.02567	0.987	0.984	0.966	0.979	1.03082	0.144926	0.954501	0.0371429	0.98392	0.252364
F1PS26	NADH-cytochrome b5 reductase	48.8889	12	12	315	35.6	8.48	0.928	0.925	0.958	0.937	1.049	1.166	0.979	1.06467	1.006	0.996	0.992	0.998	1.13625	0.0831226	0.937383	0.28994	1.0651	0.00575063
Q5TJE6	Prefoldin subunit 6	48.8372	7	7	129	14.6	8.88	0.971	0.998	0.955	0.974667	1.054	1.078	1.051	1.061	0.961	0.958	0.973	0.964	1.08858	0.00472025	0.908577	0.000560963	0.989056	0.469302
E2RMA1	Uncharacterized protein	48.8372	7	7	172	19.6	4.93	0.956	0.926	1.027	0.969667	1.055	1.03	0.981	1.022	0.955	1.026	1.044	1.00833	1.05397	0.230161	0.986628	0.71449	1.03988	0.393076
E2R9D7	Uncharacterized protein	48.8235	18	18	340	38.1	8.63	0.996	0.998	0.952	0.982	0.953	0.98	0.973	0.968667	1.084	1.03	1.033	1.049	0.986422	0.477961	1.08293	0.0141154	1.06823	0.0439454
E2RD95	Uncharacterized protein	48.8235	13	7	340	37.3	6	0.995	1.064	0.974	1.011	1.028	1.074	0.991	1.031	0.965	0.951	0.958	0.958	1.01978	0.610676	0.929195	0.0399974	0.947577	0.126041
Q8SPS5	Periplakin (Fragment)	48.7518	36	2	681	80.4	5.39	1.053	1.119	0.995	1.05567	0.91	0.925	0.955	0.93	1.097	0.95	0.996	1.01433	0.88096	0.0301878	1.09068	0.136687	0.960846	0.50345
E2RRY7	Uncharacterized protein	48.75	19	19	480	52.4	6.95	0.99	0.932	0.977	0.966333	1.062	0.976	0.992	1.01	1.006	1.04	1.025	1.02367	1.04519	0.240649	1.01353	0.653055	1.05933	0.0465385
J9P093	Uncharacterized protein	48.7395	5	5	119	13.9	4.87	1.01	0.981	1.018	1.003	1.029	0.93	1.007	0.988667	0.998	1.012	1.015	1.00833	0.98571	0.677853	1.01989	0.553758	1.00532	0.689293
F1Q1K6	Uncharacterized protein	48.7252	16	13	353	37.4	9.07	1.028	0.989	1.002	1.00633	0.987	0.971	1.009	0.989	1.022	0.974	1.018	1.00467	0.982776	0.336893	1.01584	0.454077	0.998344	0.934932
J9P5I0	Elongation factor 1-alpha	48.7013	17	1	462	50.1	8.72	0.989	1.229	0.47	0.896	0.946	0.987	1.175	1.036	1.161	0.959	1.083	1.06767	1.15625	0.583137	1.03057	0.747536	1.19159	0.499676
F1Q462	Superoxide dismutase [Cu-Zn]	48.6667	5	1	150	15.6	6.52	1.088	0.936	1.116	1.04667	0.95	0.88	1.045	0.958333	1.03	0.986	0.969	0.995	0.915605	0.296144	1.03826	0.513107	0.950637	0.429188
F6UKT8	Uncharacterized protein	48.6207	13	13	290	32.1	6.92	1.065	1.082	1.047	1.06467	0.994	0.998	0.965	0.985667	0.94	0.942	0.967	0.949667	0.925798	0.00551146	0.963476	0.0565572	0.891985	0.000991113
F1PK43	Uncharacterized protein	48.6154	15	15	325	36.6	7.52	0.982	1.024	0.988	0.998	1.025	1.008	1.016	1.01633	0.996	0.988	0.974	0.986	1.01837	0.260622	0.970154	0.0199542	0.987976	0.457461
E2R431	S-adenosylmethionine synthase	48.6076	16	16	395	43.6	6.48	1.059	0.983	0.957	0.999667	1.021	1.052	0.991	1.02133	0.93	1.016	0.992	0.979333	1.02167	0.572614	0.958877	0.248076	0.97966	0.637245
J9P9G9	Uncharacterized protein	48.5437	5	5	103	12	5.91	1.002	1.037	0.935	0.991333	1.007	1.084	0.992	1.02767	0.985	0.967	0.991	0.981	1.03665	0.42891	0.95459	0.187585	0.989576	0.75396
E2RBR6	Proteasome subunit beta type	48.4848	8	8	264	29.1	5.66	1.01	1.024	1.059	1.031	0.983	1.04	1.011	1.01133	0.978	0.937	0.958	0.957667	0.980925	0.421489	0.946935	0.0571284	0.928872	0.0174495
F1Q4F5	Adenylosuccinate synthetase isozyme 2	48.4649	19	19	456	50	6.55	0.998	0.959	0.954	0.970333	1.012	0.979	1	0.997	0.967	1.097	1.034	1.03267	1.02748	0.19024	1.03577	0.409465	1.06424	0.194404
E2RAT6	Uncharacterized protein	48.3766	10	10	308	34.5	5.06	0.977	1	1.068	1.015	1.007	0.982	0.998	0.995667	0.991	0.992	0.984	0.989	0.980952	0.531755	0.993304	0.437171	0.974384	0.396945
E2R129	Uncharacterized protein	48.3444	6	6	151	16.5	7.74	1.056	0.883	1.041	0.993333	1.086	1.02	1.001	1.03567	0.937	1.001	0.974	0.970667	1.04262	0.526125	0.937238	0.10997	0.977181	0.717524
F1PHZ3	Uncharacterized protein	48.3395	12	9	271	31.4	6.65	0.963	1.031	0.997	0.997	0.976	1.134	0.971	1.027	0.981	0.983	0.965	0.976333	1.03009	0.626536	0.950665	0.399811	0.979271	0.369158
F1Q139	Uncharacterized protein	48.3146	13	10	267	31.4	6.55	1.034	0.994	1.006	1.01133	0.999	0.947	1.009	0.985	1.008	0.996	1.007	1.00367	0.973962	0.308284	1.01895	0.394807	0.992419	0.571603
F1PPR0	Eukaryotic translation initiation factor 3 subunit I	48.3077	12	5	325	36.4	5.64	1.032	0.987	0.987	1.002	1.043	0.997	0.985	1.00833	0.984	1.001	0.983	0.989333	1.00632	0.798232	0.981157	0.365136	0.987359	0.475345
F1PQN3	Uncharacterized protein	48.2428	13	13	313	33.3	10.18	0.93	0.923	0.897	0.916667	0.968	1.036	1.046	1.01667	1.065	1.061	1.074	1.06667	1.10909	0.0194972	1.04918	0.114038	1.16364	0.000152983
F1PE09	6-phosphogluconate dehydrogenase, decarboxylating	48.2402	19	19	483	53.1	7.11	1.053	0.955	1.017	1.00833	0.961	0.954	0.995	0.97	1.041	1.013	1.01	1.02133	0.961983	0.287825	1.05292	0.0329872	1.01289	0.689749
E2RCL4	40S ribosomal protein S21	48.1928	4	4	83	9.1	8.5	0.842	0.945	1.088	0.958333	0.975	1.014	0.984	0.991	0.982	1.148	1.022	1.05067	1.03409	0.67479	1.06021	0.310174	1.09635	0.348953
F6UL10	Uncharacterized protein	48.1894	17	15	359	39.4	5.59	1.047	1.043	1.003	1.031	1.073	0.967	0.999	1.013	0.979	0.939	0.951	0.956333	0.982541	0.628347	0.944061	0.16651	0.927578	0.015315
E2RSR4	Uncharacterized protein	48.1818	9	9	220	25	5.1	1.084	1.083	1.081	1.08267	0.993	0.915	1.007	0.971667	1.007	0.919	0.911	0.945667	0.897475	0.0178936	0.973242	0.569493	0.873461	0.0112212
F1PK62	Peptidyl-prolyl cis-trans isomerase	48.1707	10	3	164	18	8.44	0.966	0.986	0.983	0.978333	1.048	1.037	1.025	1.03667	0.989	0.996	0.969	0.984667	1.05963	0.00304822	0.949839	0.00766209	1.00647	0.56861
P60952	Cell division control protein 42 homolog	48.1675	8	7	191	21.2	6.55	0.965	0.96	0.985	0.97	1.029	0.987	1.047	1.021	1.012	1.022	0.993	1.009	1.05258	0.0578235	0.988247	0.575449	1.04021	0.026983
E2RF46	Uncharacterized protein	48.1283	23	23	561	64.4	6.86	0.981	0.948	0.982	0.970333	1.004	0.999	0.995	0.999333	1.034	1.024	1.033	1.03033	1.02989	0.0647758	1.03102	0.00165449	1.06183	0.00666987
F1PBZ4	Uncharacterized protein	48	12	12	275	30.8	8.47	1.018	1.048	1.048	1.038	1.1	1.007	0.948	1.01833	0.927	0.966	0.938	0.943667	0.981053	0.686954	0.926678	0.177935	0.90912	0.0035321
E2R2F2	Uncharacterized protein	47.973	8	7	148	16.4	9.95	1.008	0.974	0.931	0.971	0.933	0.951	0.951	0.945	1.13	1.052	1.07	1.084	0.973223	0.322815	1.14709	0.00464355	1.11637	0.0252741
F1P8U8	DNA helicase	47.9576	27	27	661	73.5	8.38	1.044	0.997	1.051	1.03067	0.97	0.893	1.022	0.961667	1.036	0.986	1.001	1.00767	0.933053	0.168716	1.04783	0.31731	0.977684	0.364737
E2RMT4	Uncharacterized protein	47.8495	15	14	372	41	8.15	1.063	1.057	0.942	1.02067	0.953	0.982	1.031	0.988667	1.02	0.948	1.004	0.990667	0.968648	0.520457	1.00202	0.952476	0.970607	0.541617
J9JHD9	Uncharacterized protein	47.807	21	20	456	52.9	7.06	0.987	0.951	0.973	0.970333	1.003	1.034	1.004	1.01367	0.97	1.088	0.991	1.01633	1.04466	0.0412422	1.00263	0.947059	1.04741	0.290768
F1PP87	Uncharacterized protein	47.7589	23	23	647	72.5	5.29	1.03	1.046	1.034	1.03667	0.969	0.949	0.992	0.97	1.015	0.984	0.981	0.993333	0.935691	0.00746561	1.02405	0.230357	0.958199	0.0218398
E2R5M7	Uncharacterized protein	47.7509	8	8	289	32.3	4.96	0.861	1.074	0.973	0.969333	0.949	1.394	0.978	1.107	0.956	0.904	0.912	0.924	1.14202	0.428321	0.834688	0.274509	0.953232	0.515375
F2Z4P2	Uncharacterized protein	47.7444	15	15	266	30	10.61	0.988	0.96	0.948	0.965333	0.861	0.962	1.018	0.947	1.098	1.081	1.084	1.08767	0.981008	0.718851	1.14854	0.0383138	1.12673	0.000701801
F1P6Q0	Uncharacterized protein	47.7401	13	6	354	40.5	5.69	1.065	1.042	1.069	1.05867	1.059	0.993	0.956	1.00267	0.894	0.968	0.955	0.939	0.947103	0.147868	0.936503	0.167285	0.886965	0.00791824
T2AX92	High mobility group AT-hook 2	47.7064	6	6	109	11.8	10.62	0.897	0.936	0.876	0.903	1.014	0.975	1.033	1.00733	1.115	1.092	1.062	1.08967	1.11554	0.0130764	1.08173	0.0230259	1.20672	0.0013239
E2RNU4	DNA helicase	47.7051	31	31	719	81.4	6.21	1.008	1.011	1.007	1.00867	0.954	1.038	0.986	0.992667	1.012	0.987	0.997	0.998667	0.984137	0.549448	1.00604	0.82575	0.990086	0.246004
F6XGA3	Uncharacterized protein	47.6395	7	7	233	23.9	6.57	0.997	0.924	1.006	0.975667	0.962	1.006	1.036	1.00133	1.01	1.05	1.009	1.023	1.02631	0.488752	1.02164	0.441374	1.04851	0.1811
E2RCY8	Aconitate hydratase, mitochondrial	47.6312	32	32	781	85.7	7.94	0.974	0.977	0.95	0.967	0.995	1.007	1.008	1.00333	1.05	1.015	1.023	1.02933	1.03757	0.0187711	1.02591	0.0843893	1.06446	0.0101722
E2RQ80	Uncharacterized protein	47.619	4	4	126	13.9	10.32	0.896	0.987	0.934	0.939	0.97	1.223	0.941	1.04467	1.001	1.032	1.016	1.01633	1.11253	0.320989	0.972878	0.768653	1.08236	0.0500581
F1Q0Z2	Uncharacterized protein	47.5806	17	16	248	29.2	10.73	0.939	0.962	0.896	0.932333	0.993	1.04	1.054	1.029	1.049	1.004	1.063	1.03867	1.10368	0.0224261	1.00939	0.725252	1.11405	0.0155341
J9JHW4	Proteasome endopeptidase complex	47.5285	11	0	263	29.5	6.61	1.106	1.042	0.964	1.03733	0.805	0.959	1.058	0.940667	1.032	0.997	1.038	1.02233	0.906812	0.315359	1.08682	0.335759	0.98554	0.744814
E2RRC6	Uncharacterized protein	47.5166	30	16	604	71	6.71	0.986	1.012	0.966	0.988	0.971	1.088	0.955	1.00467	0.983	1.036	1.003	1.00733	1.01687	0.724011	1.00265	0.95527	1.01957	0.396915
F1PBA1	Sodium/potassium-transporting ATPase subunit alpha	47.5024	47	47	1021	112.6	5.49	1.074	1.109	1.082	1.08833	0.971	1.078	0.951	1	0.884	0.942	0.908	0.911333	0.918836	0.096471	0.911333	0.107414	0.837366	0.000879571
E2QY23	Uncharacterized protein	47.4777	15	11	337	37.6	5.31	0.948	0.993	0.962	0.967667	0.982	1.055	1.014	1.017	1.028	0.991	1.028	1.01567	1.05098	0.119303	0.998689	0.959147	1.0496	0.0571742
E2QZG2	Uncharacterized protein	47.4359	10	10	156	17.7	10.45	0.985	0.959	0.971	0.971667	0.984	0.96	0.992	0.978667	1.054	1.049	1.045	1.04933	1.0072	0.596901	1.07221	0.00208481	1.07993	0.00061546
F1PLU5	Uncharacterized protein	47.4026	7	7	154	16.6	6.6	1.048	0.986	0.998	1.01067	0.967	0.985	1.016	0.989333	0.998	1	1.002	1	0.978892	0.420273	1.01078	0.498759	0.989446	0.60486
E2RP05	40S ribosomal protein S6	47.3896	16	16	249	28.7	10.84	0.885	0.958	0.913	0.918667	1.025	1.059	1.094	1.05933	1.054	1.003	1.01	1.02233	1.15312	0.00847369	0.965072	0.220787	1.11284	0.0175549
P99504	ATP synthase subunit beta, mitochondrial (Fragment)	47.3684	1	1	19	1.9	11	1.11	0.978	1.122	1.07	1.098	0.869	0.993	0.986667	0.818	1.012	1	0.943333	0.922118	0.359975	0.956081	0.659498	0.88162	0.179237
B6CAN1	Calcium-transporting ATPase	47.342	38	38	997	109.6	5.36	1.004	0.961	1.051	1.00533	1.083	1.049	1.053	1.06167	0.912	0.955	0.933	0.933333	1.05603	0.115647	0.879121	0.00144248	0.928382	0.066779
E2RRB7	Uncharacterized protein	47.3251	11	10	243	27.1	7.3	0.934	0.937	0.9	0.923667	1.039	1.013	1.055	1.03567	1.026	1.04	1.056	1.04067	1.12126	0.0027764	1.00483	0.755565	1.12667	0.00134751
F6XZH6	Uncharacterized protein	47.3233	19	19	467	50.2	9.89	0.965	1.007	0.957	0.976333	0.992	1.081	1.006	1.02633	0.991	1.001	0.999	0.997	1.05121	0.189688	0.971419	0.350852	1.02117	0.261083
E2RFF0	Uncharacterized protein	47.2826	7	7	184	20.5	5.92	0.981	1.011	0.949	0.980333	1.04	1.032	1.027	1.033	0.966	0.996	0.998	0.986667	1.05372	0.0450837	0.955147	0.0136474	1.00646	0.774663
F1PD77	Uncharacterized protein	47.2803	11	11	239	27.3	5.73	1.028	0.974	0.986	0.996	1.024	0.934	1.026	0.994667	1.022	1.012	0.993	1.009	0.998661	0.971002	1.01441	0.672773	1.01305	0.519876
E2RN30	Uncharacterized protein	47.275	27	26	789	85.4	4.3	1.013	0.98	1.035	1.00933	0.993	0.941	1.023	0.985667	1.045	0.985	0.985	1.005	0.976552	0.457317	1.01961	0.5691	0.995707	0.873807
E2QXP3	Uncharacterized protein	47.2308	24	24	650	72.2	5.45	0.991	0.983	0.993	0.989	1.002	0.964	1.026	0.997333	1.052	0.989	1	1.01367	1.00843	0.672563	1.01638	0.571265	1.02494	0.278049
E2R0A0	Uncharacterized protein	47.2222	11	11	216	24.2	8.87	0.93	0.992	0.914	0.945333	0.975	0.969	1.04	0.994667	1.151	1.001	1.027	1.05967	1.05219	0.208149	1.06535	0.275962	1.12094	0.0929348
B6F250	Erythrocyte band 7 integral membrane protein stomatin	47.1831	11	11	284	31.2	7.21	1.086	1.094	1.055	1.07833	0.95	0.972	1.033	0.985	0.968	0.926	0.916	0.936667	0.913447	0.0275169	0.950931	0.17665	0.868624	0.00205019
F1PRL0	Uncharacterized protein	47.1795	32	32	780	87.5	6.79	0.954	0.975	0.993	0.974	0.999	0.98	0.987	0.988667	1.024	1.036	1.053	1.03767	1.01506	0.307806	1.04956	0.00826537	1.06537	0.0106005
E2RK77	Uncharacterized protein	47.1616	11	11	229	24.8	6.71	1.016	0.964	0.949	0.976333	0.957	1.007	1.034	0.999333	1.023	1.032	1.017	1.024	1.02356	0.490698	1.02468	0.343411	1.04882	0.08333
J9NRG7	Uncharacterized protein	47.1429	3	3	140	16.1	7.14	0.83	1.027	1.089	0.982	0.999	1.027	1.002	1.00933	1.037	1.012	0.976	1.00833	1.02783	0.745499	0.999009	0.96215	1.02682	0.75872
E2QXS7	Adenosylhomocysteinase	47.1132	20	19	433	47.7	6.54	1.037	1.001	0.981	1.00633	1.006	0.987	0.971	0.988	1.02	1.009	0.988	1.00567	0.981782	0.394959	1.01788	0.269682	0.999338	0.973528
E2RSR5	Eukaryotic translation initiation factor 3 subunit A	47.1111	66	66	1350	162.9	6.74	0.969	1.015	0.985	0.989667	0.982	1.037	0.947	0.988667	1.023	1.024	1.017	1.02133	0.99899	0.974548	1.03304	0.281818	1.032	0.0812745
E2RD79	DNA helicase	47.0158	38	38	821	93	5.39	1.008	0.987	1.013	1.00267	1.039	0.94	1.02	0.999667	1.002	0.989	1.001	0.997333	0.997008	0.928393	0.997666	0.942916	0.994681	0.585084
E2R8R8	Uncharacterized protein	46.9072	11	11	194	22.6	10.65	0.91	0.976	0.964	0.95	1.001	1.049	0.991	1.01367	1.017	1.077	1.016	1.03667	1.06702	0.0783035	1.02269	0.441779	1.09123	0.0388266
F1PX57	Uncharacterized protein	46.9045	36	11	953	105.9	5.35	1.062	0.944	1.14	1.04867	0.999	0.838	1.036	0.957667	0.977	1.022	0.982	0.993667	0.913223	0.336056	1.03759	0.595047	0.947552	0.402
J9NRV1	Uncharacterized protein	46.9027	11	11	226	25.5	7.99	0.932	0.841	1.055	0.942667	1.08	0.791	1.086	0.985667	1.054	1.068	1.093	1.07167	1.04562	0.728379	1.08725	0.429799	1.13685	0.110177
F1PPT7	Uncharacterized protein	46.8889	21	21	450	49.5	7.72	0.983	1.008	0.988	0.993	1.026	0.998	1.002	1.00867	1	0.995	0.999	0.998	1.01578	0.248503	0.989425	0.295731	1.00504	0.555852
F6XQ20	Uncharacterized protein	46.8591	25	25	589	66.2	6.9	1.006	1.017	0.966	0.996333	0.971	0.998	0.999	0.989333	1.032	0.984	1.028	1.01467	0.992974	0.717263	1.02561	0.23	1.0184	0.448275
A0A0N9JE84	Tropomyosin 4 delta	46.831	20	0	284	32.8	4.75	0.857	0.988	0.951	0.932	1.007	1.131	1.046	1.06133	0.941	1.057	1.023	1.007	1.13877	0.0729042	0.948807	0.340447	1.08047	0.222796
E2RHB3	Uncharacterized protein	46.7557	20	20	524	59	7.34	1.006	0.982	1.014	1.00067	1.02	1.009	1.005	1.01133	0.979	0.983	1.002	0.988	1.01066	0.371583	0.976928	0.0498157	0.987342	0.348882
E2R9V5	MICOS complex subunit	46.696	11	11	227	26.1	8.57	0.911	0.981	0.905	0.932333	1.025	1.02	1.045	1.03	1.054	1.005	1.053	1.03733	1.10476	0.0187672	1.00712	0.702755	1.11262	0.0230098
F1Q1J6	Uncharacterized protein	46.6912	14	4	272	30.2	9.74	0.915	0.966	1.028	0.969667	1.059	1.196	0.931	1.062	0.945	1.02	0.939	0.968	1.09522	0.329302	0.911488	0.3095	0.998281	0.970099
J9NU72	Uncharacterized protein	46.6667	9	9	270	29.7	7.31	1.005	0.973	0.925	0.967667	0.959	1.015	0.998	0.990667	1.042	1.041	1.042	1.04167	1.02377	0.465664	1.05148	0.0370743	1.07647	0.033445
J9P276	Peptidyl-prolyl cis-trans isomerase	46.6667	6	5	105	11.3	8.65	0.907	0.892	0.92	0.906333	0.951	0.867	0.996	0.938	1.093	1.172	1.201	1.15533	1.03494	0.4587	1.2317	0.0119439	1.27473	0.00170437
E2QU53	Uncharacterized protein	46.5662	22	22	597	66.4	9.19	0.924	0.929	0.959	0.937333	1.006	1.009	0.985	1	1.036	1.082	1.069	1.06233	1.06686	0.00918702	1.06233	0.0163076	1.13336	0.00204007
F1P8M6	Uncharacterized protein	46.5574	12	12	305	33.9	8.25	0.929	0.92	0.955	0.934667	1.056	1.045	0.973	1.02467	0.97	1.096	1.056	1.04067	1.09629	0.0326814	1.01561	0.742191	1.11341	0.0516743
F6XD28	Uncharacterized protein	46.5479	32	32	898	100.8	6.51	1.048	1.005	1.023	1.02533	0.987	0.984	0.993	0.988	0.995	0.99	0.975	0.986667	0.963589	0.0428494	0.99865	0.848993	0.962289	0.0491231
E2R9V0	Ribosomal protein	46.5438	11	11	217	24.8	9.98	0.969	0.917	1.024	0.97	0.972	0.951	0.965	0.962667	1.047	1.057	1.098	1.06733	0.99244	0.827357	1.10873	0.00336566	1.10034	0.0482002
J9NWU0	Uncharacterized protein	46.5116	8	8	172	19.5	9.8	0.951	0.966	1.022	0.979667	1.018	1.04	0.966	1.008	0.981	1.02	1.035	1.012	1.02892	0.409555	1.00397	0.890236	1.033	0.296287
J9PA19	Uncharacterized protein	46.5	15	15	400	44.9	7.65	0.944	0.976	0.923	0.947667	1.012	1.069	1.025	1.03533	1.022	1.018	1.011	1.017	1.09251	0.0192597	0.982292	0.355007	1.07316	0.011649
E2RQV7	Uncharacterized protein	46.4815	18	18	540	60.7	8.6	0.886	0.935	0.979	0.933333	1.039	1.025	0.991	1.01833	1.024	1.074	1.047	1.04833	1.09107	0.0490383	1.02946	0.21343	1.12321	0.0195952
A0A0N9JIB9	Tropomyosin 1 alpha	46.4789	19	1	284	32.7	4.74	0.973	0.979	0.974	0.975333	1.044	1.047	1.039	1.04333	0.926	1.018	1	0.981333	1.06972	2.1891e-05	0.940575	0.0931781	1.00615	0.841976
E2QTQ8	Uncharacterized protein	46.4444	20	20	450	49.9	9.39	0.971	1	0.933	0.968	0.968	0.997	1.012	0.992333	1.07	1.022	1.027	1.03967	1.02514	0.355368	1.0477	0.0768242	1.07404	0.0438796
F1Q3V2	ATP-citrate synthase	46.4442	45	45	1139	124.5	8.18	1.04	1.033	1.032	1.035	0.974	1	0.951	0.975	0.97	1.002	0.998	0.99	0.942029	0.0139899	1.01538	0.436501	0.956522	0.0122836
F6V8G4	Uncharacterized protein	46.4377	32	31	786	87.7	9.38	0.935	0.935	0.978	0.949333	0.951	1.02	0.938	0.969667	1.001	1.127	1.116	1.08133	1.02142	0.524613	1.11516	0.0790935	1.13904	0.0366954
E2RT33	Uncharacterized protein	46.4286	12	12	392	43.2	5.12	0.947	1.039	0.992	0.992667	0.968	1.094	1.002	1.02133	1.039	0.968	0.951	0.986	1.02888	0.567448	0.965405	0.487819	0.993284	0.868708
F6UN31	Malignant T-cell-amplified sequence	46.4088	6	6	181	20.5	8.82	0.847	1.028	0.928	0.934333	0.945	1.533	0.908	1.12867	0.901	0.978	0.932	0.937	1.20799	0.405313	0.830183	0.399977	1.00285	0.964882
E2QRR5	Uncharacterized protein	46.3636	31	31	660	75.5	6.89	0.966	0.979	0.949	0.964667	1.025	0.957	0.989	0.990333	1.087	0.978	1.07	1.045	1.02661	0.29805	1.0552	0.235039	1.08328	0.0830977
J9P4A1	Inosine triphosphate pyrophosphatase	46.3542	8	8	192	21.3	7.12	0.914	0.968	0.926	0.936	1.107	1.113	1.077	1.099	0.977	0.955	0.964	0.965333	1.17415	0.00118691	0.878374	0.000480413	1.03134	0.170378
F6X637	Uncharacterized protein	46.347	30	30	876	97.2	4.78	0.985	0.998	1.004	0.995667	0.987	0.977	0.988	0.984	1.023	1.012	1.027	1.02067	0.988283	0.152632	1.03726	0.00299583	1.02511	0.0253108
E2RHL0	Uncharacterized protein	46.3351	15	15	382	41	9.28	0.976	0.953	0.938	0.955667	0.999	1.065	0.951	1.005	1.013	1.064	1.04	1.039	1.05162	0.22976	1.03383	0.400556	1.0872	0.0106153
E2RTC5	Uncharacterized protein	46.2738	26	23	577	63.4	9.2	0.979	1.04	0.963	0.994	0.98	1.014	0.99	0.994667	1.024	0.997	1.014	1.01167	1.00067	0.980423	1.01709	0.25491	1.01777	0.514748
E2RLP0	Uncharacterized protein	46.2687	8	7	201	23	8.29	0.809	0.877	0.853	0.846333	1.126	1.169	1.208	1.16767	0.952	1.026	0.979	0.985667	1.37968	0.000485265	0.844134	0.0047546	1.16463	0.00903373
J9PA46	DNA-(apurinic or apyrimidinic site) lyase	46.2264	11	11	318	35.4	8.12	0.97	1.01	0.916	0.965333	1.001	0.99	1.023	1.00467	1.042	1.024	1.025	1.03033	1.04075	0.2453	1.02555	0.0860439	1.06733	0.0799423
E2RIA1	Uncharacterized protein	46.2185	4	4	119	14.2	9.31	1.051	1.018	0.968	1.01233	0.916	0.977	0.915	0.936	1.026	1.069	1.06	1.05167	0.924597	0.073481	1.12358	0.00893953	1.03885	0.225181
J9NRV6	Lactoylglutathione lyase	46.1957	8	8	184	20.8	5.47	0.927	0.943	0.99	0.953333	1.036	1.127	0.967	1.04333	0.98	1.015	1.016	1.00367	1.09441	0.146497	0.961981	0.453468	1.0528	0.087017
E2QYZ0	Uncharacterized protein	46.1635	28	28	795	87.2	7.33	0.973	0.975	1.013	0.987	1.007	1.013	0.997	1.00567	0.979	1.031	1.012	1.00733	1.01891	0.248269	1.00166	0.921524	1.0206	0.366865
F1PCT1	Uncharacterized protein	46.1538	5	5	104	11.9	7.78	1.132	1.126	1.16	1.13933	1.03	1.031	0.991	1.01733	0.834	0.875	0.821	0.843333	0.89292	0.00192215	0.828965	0.00114434	0.740199	0.000106596
F1P7S9	Serine/threonine-protein phosphatase	46.1538	13	3	338	38.6	6.99	0.999	0.911	1.045	0.985	1.008	0.912	1.009	0.976333	0.998	1.053	1.065	1.03867	0.991201	0.872804	1.06384	0.17818	1.05448	0.293276
E2RFR0	40S ribosomal protein S8	46.1538	9	9	208	24.2	10.32	0.957	0.964	0.922	0.947667	0.972	0.982	1.063	1.00567	1.064	1.041	1.034	1.04633	1.0612	0.140388	1.04044	0.249396	1.10412	0.00338276
E2R2N2	Mitogen-activated protein kinase	46.1111	14	9	360	41.4	6.98	0.998	0.989	1.106	1.031	1.023	1.034	0.997	1.018	0.946	0.961	0.946	0.951	0.987391	0.756564	0.934185	0.00513113	0.922405	0.102531
E2RF06	Uncharacterized protein	46.0973	37	37	1089	123	5.06	0.985	0.971	1.018	0.991333	1.004	0.999	0.988	0.997	0.988	1.028	1.019	1.01167	1.00572	0.719715	1.01471	0.322459	1.02051	0.332584
E2R9Y9	Uncharacterized protein	46.087	3	2	115	11.7	4.61	0.918	0.963	0.928	0.936333	0.971	1.23	0.987	1.06267	0.969	1.045	0.989	1.001	1.13492	0.210952	0.94197	0.516775	1.06906	0.0713484
E2R8P1	Ribonucleoside-diphosphate reductase	46.0859	28	28	792	90.2	6.8	1.198	1.153	1.141	1.164	0.872	0.954	0.923	0.916333	0.924	0.924	0.909	0.919	0.787228	0.00110677	1.00291	0.91831	0.789519	0.000170749
F1PID8	Uncharacterized protein	46.0598	30	22	736	81	7.9	0.967	0.962	0.937	0.955333	1.104	1.003	1.023	1.04333	0.986	1.003	1.016	1.00167	1.09211	0.0524783	0.960064	0.263767	1.0485	0.0218621
F1P8W3	Uncharacterized protein	46.0465	7	7	215	23.9	7.31	0.931	0.869	1.092	0.964	1.039	0.86	1.077	0.992	1.05	1.072	1.01	1.044	1.02905	0.781306	1.05242	0.494899	1.08299	0.3101
F1PG95	Uncharacterized protein	45.99	34	34	798	88.9	6.4	1.05	1.072	1.035	1.05233	0.992	1.041	0.986	1.00633	0.957	0.933	0.933	0.941	0.956288	0.0878838	0.935078	0.0270695	0.894203	0.00114476
E2R516	Synaptosomal-associated protein	45.9716	8	8	211	23.4	4.96	1.038	0.974	0.968	0.993333	1.09	0.974	0.993	1.019	0.969	0.994	1	0.987667	1.02584	0.577041	0.969251	0.446523	0.994295	0.827256
F1PNG1	Uncharacterized protein	45.9677	9	9	248	28.2	7.11	1.064	0.994	1.002	1.02	0.959	0.972	0.992	0.974333	0.974	1.041	1.003	1.006	0.955229	0.131167	1.0325	0.217272	0.986275	0.659017
E2RST4	Single-stranded DNA-binding protein	45.9459	6	6	148	17.2	9.73	0.944	0.934	1.014	0.964	1.027	1.008	1.015	1.01667	1.026	1.003	1.03	1.01967	1.05463	0.110479	1.00295	0.780758	1.05775	0.103905
J9P8Z3	Uncharacterized protein	45.9459	8	1	148	17.1	5.8	0.939	0.908	1.009	0.952	1.04	1.142	1.227	1.13633	0.809	0.909	1.016	0.911333	1.19363	0.0405534	0.801995	0.0492103	0.957283	0.575637
J9P4R4	Uncharacterized protein	45.9344	26	1	701	77.4	5.5	0.574	1.198	1.019	0.930333	1.104	1.579	0.9	1.19433	0.778	0.973	0.875	0.875333	1.28377	0.389278	0.732905	0.201417	0.940881	0.790713
E2RGH5	Uncharacterized protein	45.8846	37	19	1057	117.3	6.25	1.026	0.996	1.015	1.01233	0.997	0.935	0.98	0.970667	1.027	1.014	1.009	1.01667	0.958841	0.111472	1.04739	0.0752856	1.00428	0.694869
E2R5G6	Uncharacterized protein	45.8716	9	8	218	23.6	6.55	1.012	1.046	0.995	1.01767	1.057	1.075	1.014	1.04867	0.915	0.946	0.939	0.933333	1.03046	0.257555	0.890019	0.00481005	0.917131	0.00885534
F1P7C2	Uncharacterized protein	45.8678	34	33	968	106.7	5.45	1.006	1.028	0.998	1.01067	0.981	1.061	0.964	1.002	0.991	0.995	0.977	0.987667	0.991425	0.795086	0.985695	0.661849	0.977243	0.0936134
F1P8K1	Uncharacterized protein	45.8556	30	30	748	85.1	4.88	0.966	1.014	1.025	1.00167	0.964	0.94	1.028	0.977333	1.047	1.001	1.016	1.02133	0.975707	0.488142	1.04502	0.210725	1.01963	0.433623
P62825	GTP-binding nuclear protein Ran	45.8333	10	10	216	24.4	7.49	1.089	1.006	0.969	1.02133	0.994	0.962	1.031	0.995667	1.013	0.939	0.997	0.983	0.974869	0.562487	0.987278	0.695006	0.962467	0.413048
F1Q067	Uncharacterized protein	45.8333	15	14	384	44.8	8.22	0.987	1.075	0.957	1.00633	0.949	1.153	0.974	1.02533	0.99	0.965	0.95	0.968333	1.01888	0.8084	0.944408	0.431929	0.962239	0.365703
E2REK3	Eukaryotic translation initiation factor 3 subunit D	45.8029	17	17	548	63.9	6.05	1.002	0.991	1.082	1.025	0.953	0.92	0.958	0.943667	0.989	1.07	1.035	1.03133	0.92065	0.0588632	1.0929	0.02905	1.00618	0.872558
E2RGF3	Na(+)/H(+) exchange regulatory cofactor NHE-RF	45.7766	14	14	367	39.6	6.29	1.085	1.092	0.992	1.05633	0.972	0.958	0.989	0.973	1.033	0.934	0.946	0.971	0.921111	0.0674088	0.997945	0.953819	0.919217	0.129861
J9P2T7	Uncharacterized protein	45.7701	19	1	461	51	5.22	0.967	0.889	1.032	0.962667	1.11	0.815	1.065	0.996667	0.995	1.051	1.076	1.04067	1.03532	0.752469	1.04415	0.666785	1.08102	0.177862
J9NT23	Uncharacterized protein	45.7565	9	9	271	28.4	5.44	0.916	0.9	1.15	0.988667	1.01	0.871	0.989	0.956667	1.001	1.114	1.05	1.055	0.967633	0.744581	1.10279	0.144045	1.06709	0.489072
F1PTP3	Uncharacterized protein	45.7447	20	18	470	54.1	8.95	0.986	0.989	1.048	1.00767	0.985	1.029	0.992	1.002	1.003	0.975	0.993	0.990333	0.994376	0.827525	0.988357	0.504291	0.982799	0.470767
E2QUY7	Uncharacterized protein	45.6929	24	24	534	60.9	8.44	0.997	1.002	0.976	0.991667	0.991	1.043	0.999	1.011	0.991	1.024	0.977	0.997333	1.0195	0.343777	0.986482	0.556762	1.00571	0.741839
E2R4U9	Uncharacterized protein	45.6929	18	18	267	30.3	8.54	0.963	0.979	0.987	0.976333	0.998	1.003	0.992	0.997667	1.059	0.972	1.046	1.02567	1.02185	0.0510234	1.02807	0.362726	1.05053	0.152854
E2RNG4	Uncharacterized protein	45.6915	126	125	2878	332	7.18	1.163	1.177	1.146	1.162	0.969	0.943	1.01	0.974	0.921	0.818	0.854	0.864333	0.83821	0.000936415	0.887406	0.0379518	0.743832	0.000697853
E2QUY2	Uncharacterized protein	45.679	2	2	81	9.1	6.29	1.25	0.844	0.92	1.00467	0.702	0.865	1.128	0.898333	1.028	1.211	1.052	1.097	0.894161	0.57805	1.22115	0.219913	1.0919	0.537854
F1P975	Uncharacterized protein	45.6456	23	23	666	76.2	4.98	0.99	0.992	0.964	0.982	0.997	0.946	0.993	0.978667	1.048	1.024	1.045	1.039	0.996606	0.867142	1.06165	0.0286721	1.05804	0.00836173
F1PNJ5	Uncharacterized protein	45.6311	4	4	103	11.8	9.07	0.853	1.071	0.867	0.930333	0.937	1.388	1.005	1.11	0.976	0.963	0.941	0.96	1.19312	0.316469	0.864865	0.346606	1.03189	0.698255
F6UVH0	Uncharacterized protein	45.614	10	10	342	36.7	5.26	1.002	1.013	0.961	0.992	1.024	0.996	0.992	1.004	1.024	0.973	1.016	1.00433	1.0121	0.557047	1.00033	0.986678	1.01243	0.610992
E2RTB1	Uncharacterized protein	45.5782	13	13	294	32.6	4.77	0.97	0.927	0.988	0.961667	0.995	1.004	1.025	1.008	1.015	1.048	1.029	1.03067	1.04818	0.083101	1.02249	0.157539	1.07175	0.0280095
J9NUU3	Uncharacterized protein	45.5696	5	5	79	8.7	10.71	0.993	1.023	0.931	0.982333	0.909	0.827	0.987	0.907667	1.168	1.041	1.122	1.11033	0.92399	0.23567	1.22328	0.0267829	1.1303	0.0495485
O97492	Catalase	45.5408	21	21	527	59.8	7.34	0.992	1.013	0.972	0.992333	0.974	0.974	1.023	0.990333	1.059	0.988	1.006	1.01767	0.997985	0.92579	1.0276	0.366232	1.02553	0.357381
E2R761	L-lactate dehydrogenase	45.509	15	14	334	36.6	6.05	1.006	0.969	0.978	0.984333	1.048	0.981	1.012	1.01367	1.014	0.992	1	1.002	1.0298	0.259354	0.988491	0.597977	1.01795	0.24155
E2R685	Uncharacterized protein	45.4849	12	5	299	32.9	9.73	0.976	0.975	0.991	0.980667	1.015	0.978	1.039	1.01067	1.016	0.996	1.015	1.009	1.03059	0.179854	0.998351	0.93396	1.02889	0.0270724
E2QXA5	Uncharacterized protein	45.4545	4	4	44	5	5.36	1.075	1.054	1.014	1.04767	0.885	0.907	1.086	0.959333	1.065	0.927	0.986	0.992667	0.915686	0.252492	1.03475	0.680352	0.947502	0.277545
F1PPC7	Succinate-CoA ligase subunit beta	45.4321	16	15	405	43.8	6.43	0.993	0.979	0.951	0.974333	1.017	0.976	1.02	1.00433	1.039	1.016	1.008	1.021	1.03079	0.186	1.01659	0.381492	1.0479	0.0391625
E2R4Y6	Eukaryotic translation initiation factor 3 subunit K	45.4128	7	7	218	25.1	4.93	0.928	0.973	1.02	0.973667	1.034	1.109	0.978	1.04033	0.929	1.056	0.972	0.985667	1.06847	0.223483	0.947453	0.362277	1.01232	0.80619
F6XAE9	RNA-binding protein 8A	45.4023	6	6	174	19.9	5.72	0.979	0.953	0.908	0.946667	1.093	1.113	1.041	1.08233	0.967	0.988	0.959	0.971333	1.14331	0.0104482	0.897444	0.0086611	1.02606	0.333947
E2RMM5	Uncharacterized protein	45.3659	8	3	205	23.1	6.77	1.011	0.983	0.982	0.992	1.023	0.966	1.025	1.00467	0.985	1.03	0.996	1.00367	1.01277	0.588277	0.999005	0.968249	1.01176	0.519643
Q4LAL9	Cathepsin D	45.3659	14	14	410	44.3	7.83	0.923	0.984	1.012	0.973	0.952	1.017	0.985	0.984667	1.077	1.036	1.012	1.04167	1.01199	0.73612	1.05789	0.099553	1.07057	0.101496
E2R8D6	Uncharacterized protein	45.3303	15	6	439	48.2	6.3	1.02	0.99	1.084	1.03133	0.996	0.957	0.998	0.983667	0.966	0.994	0.995	0.985	0.953782	0.196231	1.00136	0.93905	0.955074	0.189017
F1PY21	Uncharacterized protein	45.2975	14	14	521	56.1	7.93	1.037	1.006	1.001	1.01467	1.061	1.035	0.999	1.03167	0.95	0.967	0.944	0.953667	1.01675	0.467758	0.924394	0.0154504	0.939882	0.00987036
E2R0R1	Uncharacterized protein	45.2915	9	9	223	24.8	6.35	0.936	0.979	0.922	0.945667	1.043	1.044	1.04	1.04233	1.059	0.971	1.006	1.012	1.10222	0.00491902	0.970899	0.301781	1.07014	0.0975537
F1Q0L3	Uncharacterized protein	45.2471	9	9	263	27.5	10.29	1.013	0.954	0.953	0.973333	1.035	1.04	1.034	1.03633	0.985	0.984	1.002	0.990333	1.06473	0.034108	0.955613	0.00168559	1.01747	0.457172
F1PAZ2	Uncharacterized protein	45.2193	36	30	889	98.8	6.02	0.992	0.903	1.009	0.968	1.053	0.924	1.002	0.993	0.996	1.068	1.052	1.03867	1.02583	0.642511	1.04599	0.352047	1.073	0.147774
E2RLQ4	Uncharacterized protein	45.2096	18	3	334	37	7.88	0.954	0.998	0.937	0.963	0.997	1.065	1.013	1.025	1.033	0.997	1.005	1.01167	1.06438	0.0865455	0.986992	0.596985	1.05054	0.0833428
F1PGB6	Uncharacterized protein	45.2009	32	25	896	95.5	8.76	0.981	1	1.034	1.005	0.988	1.011	0.992	0.997	0.996	0.996	1.001	0.997667	0.99204	0.663335	1.00067	0.931511	0.992703	0.66262
J9NRZ2	Uncharacterized protein	45.1456	7	7	206	22.9	5.35	0.927	0.912	0.929	0.922667	1.069	1.027	1.061	1.05233	0.998	1.05	1.027	1.025	1.14053	0.000744978	0.974026	0.239603	1.11091	0.00304864
F1PRW0	Uncharacterized protein	45.0928	13	13	377	40.7	4.79	1.008	1.019	1.024	1.017	0.959	0.933	1.03	0.974	1.016	1.004	1.007	1.009	0.957719	0.217036	1.03593	0.296998	0.992134	0.249571
E2R0J6	Serine/threonine-protein phosphatase 2A 55 kDa regulatory subunit B	45.0766	17	17	457	53	6.43	1.004	0.978	0.975	0.985667	1.024	0.962	1.022	1.00267	1.003	1.022	1.009	1.01133	1.01725	0.488854	1.00864	0.702316	1.02604	0.0759223
E2QZQ6	Uncharacterized protein	45.0652	19	17	537	60.1	5.71	1.053	1.002	1.069	1.04133	0.934	0.922	1.025	0.960333	1.008	0.982	1.006	0.998667	0.922215	0.101817	1.03992	0.317264	0.959027	0.12271
F1PFB3	Uncharacterized protein	45.045	12	12	333	37.3	5.59	1.023	0.978	1.022	1.00767	1.064	1.011	1.023	1.03267	0.961	0.979	0.939	0.959667	1.02481	0.31643	0.929309	0.0210055	0.952365	0.0632
F6X725	Uncharacterized protein	45	24	24	600	67.4	8.34	0.981	0.955	0.953	0.963	1.022	1.042	0.989	1.01767	0.969	1.072	1.017	1.01933	1.05677	0.037827	1.00164	0.962738	1.0585	0.144251
F1PYQ2	Peptidylprolyl isomerase	45	4	4	140	15.2	9.33	0.952	0.91	1.098	0.986667	1.12	1.012	0.994	1.042	0.978	0.981	0.954	0.971	1.05608	0.468949	0.931862	0.152599	0.984122	0.799121
E2RK00	Uncharacterized protein	44.9438	3	2	89	10.4	7.4	0.937	1.075	1.149	1.05367	1.007	0.98	1.012	0.999667	0.971	0.923	0.947	0.947	0.94875	0.439093	0.947316	0.0366257	0.898766	0.169071
F1PM36	Uncharacterized protein	44.8864	20	20	528	58.9	5.76	1.031	0.999	1.03	1.02	0.963	1.027	0.975	0.988333	0.99	0.982	1.004	0.992	0.968954	0.228167	1.00371	0.867801	0.972549	0.0853881
E2RKJ1	Uncharacterized protein	44.8802	32	32	918	102.1	5.2	1.019	1.065	0.961	1.015	0.964	1.049	0.987	1	1.006	0.962	0.987	0.985	0.985222	0.722546	0.985	0.625349	0.970443	0.410504
E2R9A2	Coatomer subunit beta	44.8059	34	34	953	107.1	6.05	0.996	0.951	1.025	0.990667	0.994	0.946	1.007	0.982333	1.014	1.051	1.016	1.027	0.991588	0.783919	1.04547	0.113363	1.03668	0.214546
F1PAR9	Epididymal secretory protein E1	44.8052	6	6	154	16.6	7.94	1.116	0.99	0.978	1.028	0.954	0.846	1.068	0.956	1.035	1.008	1.005	1.016	0.929961	0.407223	1.06276	0.406889	0.988327	0.803567
F1PQ76	Uncharacterized protein	44.7368	5	5	152	17	8.95	0.97	0.939	1.188	1.03233	1.041	1.077	0.969	1.029	0.924	0.928	0.964	0.938667	0.996771	0.970436	0.912213	0.05751	0.909267	0.303347
E2RM72	Uncharacterized protein	44.7368	7	7	228	26.8	4.97	0.968	0.927	1.147	1.014	1.051	0.887	1.011	0.983	1.025	0.971	1.014	1.00333	0.969428	0.729775	1.02068	0.715948	0.989481	0.885495
E2RAZ8	Glycerol-3-phosphate dehydrogenase	44.7368	27	27	722	80.3	6.7	0.92	1.002	0.956	0.959333	0.977	1.041	0.999	1.00567	1.036	1.006	1.065	1.03567	1.0483	0.200458	1.02983	0.302143	1.07957	0.0592166
F1P6L5	Uncharacterized protein	44.7307	7	7	427	45.5	4.96	1.115	1.027	1.062	1.068	0.974	0.979	0.927	0.96	0.897	1.034	0.984	0.971667	0.898876	0.0239272	1.01215	0.801001	0.9098	0.112471
F1PQD3	Uncharacterized protein	44.7214	23	23	682	77.4	5.47	1.075	1.003	1.01	1.02933	1.014	0.949	0.962	0.975	1.018	0.987	0.982	0.995667	0.947215	0.147687	1.0212	0.416492	0.967293	0.257835
E2R2V4	Uncharacterized protein	44.687	26	26	687	78.3	6.04	0.993	1.023	0.964	0.993333	0.987	1.01	1.002	0.999667	1.021	1.008	0.993	1.00733	1.00638	0.746956	1.00767	0.506913	1.01409	0.499041
F6V393	Uncharacterized protein	44.6746	11	10	338	39.6	7.53	1.054	1.002	1.035	1.03033	1.06	0.934	0.992	0.995333	0.979	0.988	0.956	0.974333	0.96603	0.425131	0.978902	0.606624	0.945649	0.0354268
J9NZX7	Malic enzyme	44.668	16	10	497	55.1	5.59	0.999	0.962	0.967	0.976	1.055	0.952	1.019	1.00867	1.028	1.008	1.01	1.01533	1.03347	0.369429	1.00661	0.839442	1.0403	0.0409325
F1PW12	Uncharacterized protein	44.6429	11	11	280	32.2	7.64	0.98	1.003	0.944	0.975667	1.043	0.983	1.045	1.02367	1.054	0.96	0.989	1.001	1.0492	0.145688	0.977857	0.546394	1.02597	0.481334
J9P7H5	Uncharacterized protein	44.6367	30	30	867	96.5	7.42	1.042	1.018	1.026	1.02867	1.07	1.006	1.02	1.032	0.914	0.927	0.979	0.94	1.00324	0.879683	0.910853	0.0296027	0.913804	0.0136145
J9NTD9	Histone H2B	44.6328	10	2	177	19.9	10.15	0.9	0.896	0.914	0.903333	1.079	0.999	1.029	1.03567	1.05	1.082	1.052	1.06133	1.14649	0.00525046	1.02478	0.371535	1.17491	0.000173999
E2RE13	Uncharacterized protein	44.6237	7	6	186	21.5	8.43	0.951	0.891	0.912	0.918	0.922	0.892	1.032	0.948667	1.156	1.07	1.172	1.13267	1.03341	0.541843	1.19396	0.0256192	1.23384	0.00406242
J9JHD4	Uncharacterized protein	44.5727	16	16	433	45.7	8.69	0.919	1.004	0.949	0.957333	1.032	1.021	1.012	1.02167	1.054	0.989	1.021	1.02133	1.0672	0.0655121	0.999674	0.987269	1.06685	0.109284
F1PR93	WD repeat domain 1	44.5545	22	22	606	66.3	6.62	1.039	1.002	0.957	0.999333	1.004	0.991	0.98	0.991667	1.002	1.009	1.017	1.00933	0.992328	0.771788	1.01782	0.0968762	1.01001	0.699496
F1PKS3	ATP-dependent 6-phosphofructokinase	44.5302	29	25	777	85.3	7.68	1.069	0.971	0.965	1.00167	0.999	0.977	0.983	0.986333	1.001	1.028	1.007	1.012	0.984692	0.678373	1.02602	0.0707505	1.01032	0.780633
E2RD75	Uncharacterized protein	44.5196	22	22	739	80.9	6.19	0.982	0.985	0.993	0.986667	0.975	0.975	1.04	0.996667	1.044	0.993	1.013	1.01667	1.01014	0.671832	1.02007	0.488711	1.03041	0.119575
E2R8A2	Vacuolar protein sorting-associated protein 29	44.4444	8	8	180	20.3	6.79	1.04	1	0.998	1.01267	1.036	1.001	0.964	1.00033	0.996	0.988	0.978	0.987333	0.987821	0.64615	0.987004	0.576835	0.974984	0.158524
P61007	Ras-related protein Rab-8A	44.4444	9	4	207	23.7	9.07	0.945	0.993	0.958	0.965333	1.105	1.157	0.98	1.08067	0.925	0.971	0.965	0.953667	1.11948	0.10153	0.88248	0.0801235	0.987914	0.597032
E2QYF3	Uncharacterized protein	44.4169	31	30	806	89.7	8.57	0.937	0.971	0.946	0.951333	0.995	1.068	1.025	1.02933	1.026	1.011	1.02	1.019	1.08199	0.0293996	0.989961	0.657749	1.07113	0.0036209
E2RET1	Uncharacterized protein	44.4006	50	50	1268	141.5	6.87	1.036	1.069	1.029	1.04467	1.038	0.979	1.035	1.01733	0.932	0.941	0.941	0.938	0.973835	0.296912	0.922018	0.0150333	0.897894	0.00109739
G1K288	Ras-related protein Rab-2A	44.3966	10	4	232	25.9	8.81	0.961	0.949	0.984	0.964667	1.036	1.028	1.022	1.02867	0.998	1.032	0.989	1.00633	1.06634	0.00440315	0.978289	0.17858	1.04319	0.0664812
E2RHR0	Uncharacterized protein	44.3645	12	12	417	45.5	5.78	0.953	0.987	0.918	0.952667	0.969	0.989	1.063	1.007	1.071	1.022	1.029	1.04067	1.05703	0.193928	1.03343	0.357787	1.09237	0.0248167
F1PCT7	Uncharacterized protein	44.3586	22	22	647	70.8	6.13	0.995	0.976	0.981	0.984	0.915	1.009	1.012	0.978667	1.03	1.05	1.031	1.037	0.99458	0.877043	1.0596	0.147142	1.05386	0.00358104
E2RIA8	Uncharacterized protein	44.358	10	10	257	28	11.03	0.992	0.959	0.967	0.972667	0.998	0.913	0.987	0.966	1.04	1.085	1.057	1.06067	0.993146	0.826414	1.098	0.0334332	1.09047	0.00589863
F1Q0I8	Uncharacterized protein	44.2857	8	4	210	23.7	7.87	1.089	1.025	1.127	1.08033	0.931	0.932	0.959	0.940667	0.978	0.981	0.979	0.979333	0.870719	0.0109504	1.04111	0.0137319	0.90651	0.0274768
F1PUU5	Uncharacterized protein	44.2573	26	26	653	73	6.4	0.987	1.007	0.977	0.990333	1.008	0.994	1.019	1.007	1.03	0.987	0.992	1.003	1.01683	0.217776	0.996028	0.807691	1.01279	0.477713
F1P914	Uncharacterized protein	44.1573	30	30	890	99.1	5.68	1.004	1.062	1.006	1.024	0.99	0.977	0.971	0.979333	1.028	0.961	1.001	0.996667	0.95638	0.0872798	1.0177	0.440345	0.973307	0.37188
J9P6R1	Uncharacterized protein	44.1358	11	11	324	37	6.77	0.998	0.939	0.942	0.959667	1.006	0.968	0.993	0.989	1.024	1.07	1.06	1.05133	1.03057	0.256745	1.06303	0.0251783	1.09552	0.0181082
E2RNT3	Uncharacterized protein	44.1223	43	43	1276	141.2	6.84	0.984	1	1.025	1.003	1.045	0.944	1.046	1.01167	0.942	1.022	0.992	0.985333	1.00864	0.820992	0.97397	0.556573	0.982386	0.537178
E2R529	Uncharacterized protein	44.1065	35	35	1052	117.8	6.14	1.014	0.978	0.952	0.981333	0.976	0.955	1.011	0.980667	1.036	1.031	1.047	1.038	0.999321	0.979417	1.05846	0.0279944	1.05774	0.0380704
E2RFL0	Uncharacterized protein	44.0945	8	8	254	27.8	6.67	1.063	1.04	0.964	1.02233	0.986	0.89	1.065	0.980333	1.039	0.963	0.991	0.997667	0.958918	0.514372	1.01768	0.769409	0.975872	0.544006
E2RB37	Uncharacterized protein	44.0909	16	16	440	48.3	5.1	0.915	0.979	0.913	0.935667	0.988	1.078	1.042	1.036	1.004	1.047	1.034	1.02833	1.10723	0.0418103	0.9926	0.805134	1.09904	0.0210851
B6V8E6	Catenin beta-1	44.0461	27	24	781	85.5	5.86	1.183	1.153	1.157	1.16433	0.951	0.935	0.925	0.937	0.866	0.907	0.921	0.898	0.804752	4.68553e-05	0.958378	0.0982057	0.771257	0.000150087
E2QWR3	Uncharacterized protein	44.0281	17	17	427	46.5	8.31	1.003	1.031	0.967	1.00033	0.982	0.946	1.001	0.976333	1.043	1.008	1.02	1.02367	0.976008	0.383812	1.04848	0.0685295	1.02333	0.332421
J9P1M6	Uncharacterized protein	44.0252	7	3	159	17.9	8.25	0.958	0.994	0.973	0.975	1.061	1.067	1.016	1.048	0.99	0.978	0.964	0.977333	1.07487	0.0190153	0.93257	0.0164174	1.00239	0.864871
F1P7I7	Serine/threonine-protein phosphatase	44.0129	11	2	309	35.6	5.54	1.052	0.983	1.02	1.01833	1.01	0.987	1	0.999	0.97	0.995	0.984	0.983	0.981015	0.409716	0.983984	0.178992	0.965303	0.171034
F1PKU9	Uncharacterized protein	44	4	4	75	8.5	10.07	0.987	0.943	0.897	0.942333	0.953	0.98	1.04	0.991	1.07	1.028	1.103	1.067	1.05164	0.253865	1.07669	0.0867893	1.1323	0.0211584
E2RFR5	Uncharacterized protein	43.956	3	2	91	10.5	7.37	1.174	0.968	1.052	1.06467	0.951	0.995	0.98	0.975333	0.97	0.963	0.947	0.96	0.916093	0.218037	0.984279	0.352825	0.901691	0.15703
E2QXA6	Uncharacterized protein	43.9181	28	28	781	83.7	5.5	1.002	0.978	0.949	0.976333	0.951	0.971	1.074	0.998667	1.055	1.022	0.999	1.02533	1.02287	0.615492	1.0267	0.554821	1.05019	0.0932971
E2RAC6	Uncharacterized protein	43.8356	17	14	511	56.5	5.81	1.079	1.054	0.985	1.03933	0.893	0.964	0.999	0.952	1.025	1.002	1	1.009	0.915972	0.105989	1.05987	0.151381	0.970815	0.358013
E2RAT4	Uncharacterized protein	43.8356	10	10	219	24.3	5.16	0.954	1.05	0.956	0.986667	1.02	1.131	1.008	1.053	0.962	0.961	0.958	0.960333	1.06723	0.258162	0.911997	0.0771871	0.973311	0.452778
Q8HYU5	Apoptosis regulator Bax	43.75	6	6	192	21.3	5.22	1	0.843	1.17	1.00433	1.023	0.733	1.086	0.947333	1.059	1.017	1.07	1.04867	0.943246	0.7124	1.10697	0.408652	1.04414	0.667561
E2R119	Uncharacterized protein	43.75	6	6	160	18.3	6.27	0.971	0.995	0.95	0.972	0.991	1.09	1.065	1.04867	1.007	0.964	0.967	0.979333	1.07888	0.0773894	0.933884	0.102018	1.00754	0.719213
F6Y016	Uncharacterized protein	43.75	7	7	144	16.3	9.83	0.968	0.902	1.004	0.958	1.064	0.967	1.081	1.03733	1.035	0.988	0.992	1.005	1.08281	0.162471	0.96883	0.448957	1.04906	0.2326
J9NYJ8	Uncharacterized protein	43.75	7	2	208	23.5	5.54	0.934	0.911	1.051	0.965333	1.074	0.958	0.972	1.00133	1.009	1.075	1.017	1.03367	1.03729	0.560002	1.03229	0.484903	1.07079	0.228256
E2RJ54	Uncharacterized protein	43.7358	18	1	439	48.4	5.88	1.016	1.006	0.921	0.981	0.986	1.044	1.028	1.01933	0.996	1.02	0.983	0.999667	1.03908	0.331857	0.980706	0.389817	1.01903	0.591285
F1PB08	Uncharacterized protein	43.696	24	24	579	64.4	8.88	0.949	0.94	0.917	0.935333	1.135	1.169	1.056	1.12	0.951	0.931	0.952	0.944667	1.19743	0.00606109	0.843452	0.00682781	1.00998	0.470711
E2R4L7	Serine hydroxymethyltransferase	43.6911	20	20	531	59	9.26	0.987	0.948	0.928	0.954333	1.046	1.049	1.017	1.03733	1.003	1.013	1.008	1.008	1.08697	0.0145143	0.971722	0.0505244	1.05623	0.0378156
F1PD80	Transcription factor BTF3	43.6709	6	4	158	17.3	6.35	0.977	0.954	0.942	0.957667	1.085	1.086	1.059	1.07667	0.97	1.009	0.918	0.965667	1.12426	0.000926555	0.896904	0.0162287	1.00835	0.791359
F1PEA6	Uncharacterized protein	43.6662	29	21	671	75.6	9.35	1.004	0.975	1.02	0.999667	1.065	1.111	1.001	1.059	0.884	0.974	0.965	0.941	1.05935	0.160658	0.888574	0.051183	0.941314	0.136045
F1PIF7	DNA-directed RNA polymerase subunit	43.6508	2	2	126	13.8	5.25	0.955	0.949	1.082	0.995333	1.116	0.947	0.957	1.00667	0.975	1.142	0.877	0.998	1.01139	0.878955	0.991391	0.931531	1.00268	0.977453
E2RSF6	Uncharacterized protein	43.6464	6	0	181	20.6	7.43	0.954	0.833	1.16	0.982333	0.942	0.929	1.03	0.967	0.982	1.149	1.021	1.05067	0.984391	0.886221	1.08652	0.232957	1.06956	0.561149
J9NWP6	Uncharacterized protein	43.6464	6	1	181	20.7	6.58	0.896	0.781	0.988	0.888333	1.375	0.706	1.291	1.124	0.954	0.972	1.035	0.987	1.26529	0.341982	0.878114	0.553037	1.11107	0.202053
E2RIQ2	Uncharacterized protein	43.6229	22	22	541	60.5	5.38	1.048	1.038	0.975	1.02033	0.986	0.985	1.006	0.992333	0.999	0.985	0.978	0.987333	0.972558	0.305545	0.994961	0.616172	0.967658	0.235704
F1PUB9	Uncharacterized protein	43.6214	31	30	972	109.4	5	0.999	1.061	1.055	1.03833	0.946	1.023	0.935	0.968	0.994	0.99	0.997	0.993667	0.932263	0.107409	1.02652	0.40746	0.956982	0.0875878
E2RIV3	Serine hydroxymethyltransferase	43.595	18	18	484	53.4	7.37	1.068	0.962	1.061	1.03033	0.992	0.845	1.023	0.953333	1.015	1.006	1.028	1.01633	0.925267	0.299783	1.06608	0.317974	0.986412	0.708168
E2RG21	Uncharacterized protein	43.5644	5	5	101	10.8	9.6	1.023	1.001	0.802	0.942	0.938	1.006	1.08	1.008	1.105	1.024	1.022	1.05033	1.07006	0.462824	1.042	0.438775	1.115	0.224226
F1PXU2	Uncharacterized protein	43.5294	12	11	340	38.4	8.19	0.942	0.951	0.921	0.938	1.035	0.977	1.073	1.02833	1.067	0.982	1.052	1.03367	1.0963	0.0367979	1.00519	0.895922	1.10199	0.0258511
E2QYG6	Uncharacterized protein	43.5275	22	22	618	68.4	5.52	1.053	1.054	1.008	1.03833	0.949	0.995	0.982	0.975333	1.012	0.97	0.977	0.986333	0.939326	0.0368215	1.01128	0.591292	0.94992	0.05982
F6Y140	Uncharacterized protein	43.5216	24	20	602	63.3	7.3	1.058	0.93	1.023	1.00367	0.976	0.865	1.003	0.948	1.035	1.059	1.051	1.04833	0.944537	0.383584	1.10584	0.0790633	1.0445	0.314217
F1PTK1	Succinate-CoA ligase subunit beta	43.5185	19	17	432	46.8	7.15	1.009	0.971	0.938	0.972667	1.079	1.028	0.99	1.03233	1.023	0.979	0.983	0.995	1.06134	0.144388	0.963836	0.272455	1.02296	0.419811
J9NZC6	Uncharacterized protein	43.5146	18	18	478	51.5	9.45	0.977	0.983	1.004	0.988	0.999	0.951	1.011	0.987	1.052	0.989	1.033	1.02467	0.998988	0.962659	1.03816	0.22326	1.03711	0.146297
E2RNA4	Ribosome biogenesis protein WDR12	43.4988	13	13	423	47.7	6	1.053	1.008	0.941	1.00067	0.977	0.993	0.964	0.978	0.988	1.056	1.02	1.02133	0.977348	0.536935	1.04431	0.112338	1.02065	0.615498
E2RJL3	Uncharacterized protein	43.4783	11	11	253	28.3	10.08	0.988	0.978	0.973	0.979667	1.042	1.018	1.019	1.02633	0.985	1.007	0.991	0.994333	1.04764	0.0065667	0.968821	0.0352019	1.01497	0.137291
E2QWJ8	Uncharacterized protein	43.4783	5	5	161	17.8	5.15	0.943	0.984	0.985	0.970667	1.191	1.011	1.016	1.07267	0.963	0.904	1.003	0.956667	1.10508	0.168614	0.891858	0.152693	0.985577	0.683507
E2R3D3	Uncharacterized protein	43.4783	8	6	184	21.4	10.17	0.924	0.925	1.004	0.951	0.969	0.927	0.974	0.956667	1.089	1.089	1.099	1.09233	1.00596	0.861221	1.14181	0.000887102	1.14862	0.00612299
E2R624	Uncharacterized protein	43.4314	53	53	1393	157.6	6.87	1.008	1.021	1.031	1.02	0.986	1.001	0.983	0.99	0.951	1.025	0.994	0.99	0.970588	0.025902	1	1	0.970588	0.252664
E2REH5	Uncharacterized protein	43.4272	11	11	426	44.1	8.5	0.951	0.963	0.966	0.96	1.011	0.985	1.032	1.00933	1.073	1.01	1.01	1.031	1.05139	0.0263161	1.02147	0.435281	1.07396	0.0298433
F1P9W2	Calponin	43.4084	11	2	311	34.3	5.41	1.026	0.972	1.139	1.04567	0.974	0.96	0.906	0.946667	0.977	1.03	1.016	1.00767	0.905324	0.13731	1.06444	0.0796268	0.96366	0.50305
E2R0L3	Uncharacterized protein	43.3962	6	6	159	17.8	9.26	1.061	1.088	1.03	1.05967	0.98	0.971	0.977	0.976	0.972	0.947	0.972	0.963667	0.921044	0.00786154	0.987363	0.231182	0.909405	0.00683951
F1PGY9	Uncharacterized protein	43.3922	175	175	4646	532.1	6.43	1.044	1.013	1.044	1.03367	0.973	0.994	0.97	0.979	0.999	0.985	0.978	0.987333	0.947114	0.0129332	1.00851	0.440994	0.955176	0.0183143
F1PI16	60S ribosomal protein L13a	43.3498	11	11	203	23.5	10.93	0.95	0.954	0.983	0.962333	0.956	1.025	0.995	0.992	1.053	1.067	1.016	1.04533	1.03083	0.258098	1.05376	0.100875	1.08625	0.0107874
F1PR47	DNA helicase	43.3368	34	34	953	107	5.55	0.984	0.999	1.007	0.996667	0.984	1.011	0.996	0.997	1.014	1.003	1.002	1.00633	1.00033	0.975774	1.00936	0.344021	1.0097	0.280872
E2R9R1	Uncharacterized protein	43.3213	10	10	277	31.5	8.63	0.995	1.015	0.967	0.992333	1.081	1.076	1.032	1.063	0.927	0.957	0.951	0.945	1.07121	0.0276858	0.888993	0.00283768	0.952301	0.0468676
F1Q4C5	Uncharacterized protein	43.2821	28	27	975	108.2	6.32	0.955	0.954	0.867	0.925333	1.009	1.12	0.854	0.994333	0.9	1.194	1.146	1.08	1.07457	0.449839	1.08615	0.51255	1.16715	0.181068
E2QWK8	Uncharacterized protein	43.2584	8	8	178	21.2	9.94	1.017	0.957	1.04	1.00467	0.988	0.98	0.977	0.981667	0.983	1.044	1.014	1.01367	0.977107	0.408912	1.0326	0.148577	1.00896	0.781703
P18066	Ras-related protein Rab-5A	43.2558	7	3	215	23.6	8.15	1.009	0.965	0.876	0.95	1.073	1.014	1.064	1.05033	1.042	0.965	0.991	0.999333	1.10561	0.0809599	0.951444	0.154814	1.05193	0.336281
F6XV93	Lon protease homolog, mitochondrial	43.2503	26	25	763	85.5	5.91	0.937	1.007	0.969	0.971	0.973	0.995	1.015	0.994333	1.049	1.009	1.044	1.034	1.02403	0.378581	1.03989	0.0857604	1.06488	0.0573283
J9NU79	Uncharacterized protein	43.1973	17	2	294	32.4	5.05	0.67	1.166	0.939	0.925	0.902	1.809	0.838	1.183	0.903	0.95	0.822	0.891667	1.27892	0.495855	0.753733	0.408417	0.963964	0.833006
E2QWY5	Uncharacterized protein	43.1818	6	6	176	20.9	8.51	0.926	0.988	0.952	0.955333	1.117	1.087	1.013	1.07233	0.941	1.008	0.968	0.972333	1.12247	0.0307161	0.906745	0.0520102	1.01779	0.556008
E2R268	Uncharacterized protein	43.1755	12	12	359	39.2	6.65	0.906	0.952	1.032	0.963333	1.009	1.029	1.015	1.01767	1.021	1.018	1.019	1.01933	1.0564	0.218788	1.00164	0.794642	1.05813	0.202948
F1PI25	Sideroflexin	43.1677	10	10	322	35.7	9.06	0.978	0.935	0.9	0.937667	0.968	1.078	1.019	1.02167	1.036	1.039	1.047	1.04067	1.08958	0.0973962	1.0186	0.584079	1.10985	0.0106683
E2RAL7	Uncharacterized protein	43.1373	7	7	153	17.5	6.68	0.918	0.969	0.942	0.943	1.043	1.053	1.03	1.042	1.073	0.974	0.998	1.015	1.10498	0.00360156	0.974088	0.426734	1.07635	0.0963495
F1PAM3	Isocitrate dehydrogenase [NADP]	43.128	16	15	422	47.4	8.28	0.956	0.93	0.978	0.954667	1.021	0.937	1.047	1.00167	1.067	1.015	1.048	1.04333	1.04923	0.261454	1.0416	0.317386	1.09288	0.0125462
F6XFY9	Uncharacterized protein	43.1267	16	16	371	42.4	5.35	0.989	0.937	0.957	0.961	1.008	1.047	0.984	1.013	0.964	1.107	1.006	1.02567	1.05411	0.0942083	1.0125	0.797683	1.06729	0.224551
F1PYI3	2',3'-cyclic-nucleotide 3'-phosphodiesterase	43.0952	16	15	420	47.3	8.87	1.076	1.149	1.088	1.10433	0.983	0.911	0.947	0.947	0.98	0.906	0.96	0.948667	0.857531	0.00686664	1.00176	0.958825	0.85904	0.00790373
J9P326	Polyadenylate-binding protein	43.0818	25	19	636	70.6	9.5	0.944	0.952	1.009	0.968333	0.944	0.961	0.952	0.952333	1.057	1.076	1.105	1.07933	0.983477	0.489435	1.13336	0.00101176	1.11463	0.0109796
F1PIK5	Uncharacterized protein	43.0464	6	6	151	17.3	5.33	1	0.94	0.964	0.968	1.037	0.983	0.979	0.999667	1.016	1.058	1.022	1.032	1.03271	0.283255	1.03234	0.229852	1.06612	0.0426674
E2R580	Uncharacterized protein	42.9719	8	2	249	27.8	8.62	0.935	0.886	1.062	0.961	0.94	1.039	0.97	0.983	1.053	1.041	1.075	1.05633	1.02289	0.732768	1.0746	0.0768917	1.0992	0.148653
E2RRW0	Uncharacterized protein	42.9448	8	8	163	18.6	4.54	1.089	1.078	1.071	1.07933	0.978	0.924	1.041	0.981	0.958	0.933	0.928	0.939667	0.908894	0.0452741	0.957866	0.303747	0.870599	0.000195672
E2R8W7	Uncharacterized protein	42.8152	17	13	341	39.8	6.89	1.09	1.019	1.05	1.053	0.985	0.967	0.99	0.980667	0.979	0.956	0.964	0.966333	0.931307	0.0290365	0.985384	0.213826	0.917695	0.0160349
F1P6K2	Uncharacterized protein	42.7992	19	19	493	55.9	7.94	1.013	0.994	0.984	0.997	0.97	1.04	0.941	0.983667	0.927	1.07	1.061	1.01933	0.986627	0.685425	1.03626	0.550544	1.0224	0.659546
E2RB31	Uncharacterized protein	42.7711	36	36	996	111.4	5.21	0.946	0.979	0.974	0.966333	0.978	1.008	0.984	0.99	1.035	1.019	1.075	1.043	1.02449	0.160649	1.05354	0.0494034	1.07934	0.0172678
E2RF42	Amidophosphoribosyltransferase	42.7466	16	16	517	57.1	6.92	1.031	1.007	0.953	0.997	0.999	1.027	0.989	1.005	0.97	1.022	1.001	0.997667	1.00802	0.771273	0.992703	0.717862	1.00067	0.981867
F1PWC2	Uncharacterized protein	42.7273	3	3	110	12.5	6.86	0.951	0.901	0.94	0.930667	0.995	0.918	1.116	1.00967	1.093	1.063	1.024	1.06	1.08489	0.255569	1.04985	0.455591	1.13897	0.00671468
F1PDT7	Uncharacterized protein	42.7241	31	21	859	95	6.16	1.029	1.037	1.025	1.03033	0.929	0.999	0.972	0.966667	1.017	1	0.991	1.00267	0.938208	0.0370092	1.03724	0.173407	0.973148	0.0301092
H9GW54	Uncharacterized protein	42.723	16	16	426	47.7	4.98	1.022	0.982	1.04	1.01467	1.035	0.936	1.018	0.996333	1	0.981	0.984	0.988333	0.981932	0.628484	0.991971	0.809849	0.974047	0.219937
E2RDY8	Uncharacterized protein	42.716	14	14	405	44.3	7.08	1.036	1.011	0.983	1.01	1.006	0.99	0.976	0.990667	0.99	1.019	0.988	0.999	0.980858	0.333454	1.00841	0.563398	0.989109	0.580059
E2QXB6	Uncharacterized protein	42.7083	10	10	288	32.6	6.58	0.988	0.962	1.013	0.987667	0.99	0.991	1.009	0.996667	1.014	1.011	1.022	1.01567	1.00911	0.603046	1.01906	0.0531311	1.02835	0.137009
E2RB07	Uncharacterized protein	42.7083	14	14	480	54.6	6.67	0.961	1.024	0.965	0.983333	1.023	1.023	0.986	1.01067	1.03	0.999	0.989	1.006	1.0278	0.314955	0.995383	0.802342	1.02305	0.395088
E2R413	Uncharacterized protein	42.6934	13	13	349	38.8	6.46	1.056	1.047	0.99	1.031	0.939	0.988	1.001	0.976	1.038	0.964	0.978	0.993333	0.946654	0.120843	1.01776	0.588634	0.963466	0.287043
J9NZA2	Uncharacterized protein	42.6534	24	1	701	78.2	6.74	0.979	1.087	0.917	0.994333	0.93	1.067	0.953	0.983333	1.118	0.89	1.058	1.022	0.988937	0.87436	1.03932	0.655349	1.02782	0.759496
Q9XSS9	Ras-related rho protein (Fragment)	42.5532	2	1	47	5.3	8.51	1.493	1.393	1.395	1.427	0.562	0.527	0.477	0.522	1.136	1.031	0.986	1.051	0.365802	2.54264e-05	2.01341	0.000481308	0.73651	0.00245349
J9NTK7	Uncharacterized protein	42.5532	3	3	94	11.1	7.28	0.97	1.004	1.055	1.00967	0.992	0.984	1.054	1.01	1.029	0.959	0.954	0.980667	1.00033	0.99246	0.970957	0.421626	0.971278	0.448944
E2R655	Uncharacterized protein	42.515	26	24	668	75	9.66	1.037	1.067	1.043	1.049	1.03	0.982	0.964	0.992	0.969	0.943	0.966	0.959333	0.945663	0.0585755	0.96707	0.200595	0.914522	0.00188571
E2R1E6	Uncharacterized protein	42.5	21	21	560	63	7.18	1.08	1.02	1.039	1.04633	0.956	0.998	0.953	0.969	0.972	0.999	0.984	0.985	0.926091	0.0278655	1.01651	0.386912	0.941383	0.0338712
E2R8U8	Uncharacterized protein	42.5	4	4	80	9.1	9.58	0.938	0.951	0.908	0.932333	1.02	1.141	1.022	1.061	0.995	1.03	0.994	1.00633	1.13801	0.0374809	0.948476	0.260249	1.07937	0.0130884
E2QUR2	Uncharacterized protein	42.4785	55	54	1509	169.8	7.55	1.005	0.997	1.037	1.013	1.005	1.002	0.987	0.998	0.974	1.005	0.988	0.989	0.985192	0.326557	0.990982	0.441744	0.976308	0.188443
E2RS70	Uncharacterized protein	42.4658	13	13	365	40.4	7.08	1.065	1.072	1.012	1.04967	0.943	0.979	0.993	0.971667	0.988	0.964	0.984	0.978667	0.925691	0.0317574	1.0072	0.695611	0.932359	0.0251245
F1Q0B0	Uncharacterized protein	42.3776	37	37	715	77.4	4.67	0.966	0.978	0.945	0.963	0.957	0.991	1.017	0.988333	1.066	1.015	1.065	1.04867	1.02631	0.271327	1.06105	0.067196	1.08896	0.0115528
J9P266	Uncharacterized protein	42.3682	62	1	2162	236.9	6.58	0.993	1.115	0.968	1.02533	0.999	0.945	0.99	0.978	1	1.005	0.984	0.996333	0.953836	0.383334	1.01875	0.362761	0.971717	0.561413
F1PU93	Coatomer subunit alpha	42.3394	41	41	1214	137.2	7.59	0.99	1.029	0.977	0.998667	0.982	1.022	0.982	0.995333	1.022	0.999	0.997	1.006	0.996662	0.878949	1.01072	0.53068	1.00734	0.697712
F1PDY8	Uncharacterized protein	42.3077	10	10	260	29.2	7.18	0.934	1.004	0.908	0.948667	0.966	1.02	1.028	1.00467	1.073	1.029	1.039	1.047	1.05903	0.181403	1.04214	0.147158	1.10365	0.0358387
F1PU14	Uncharacterized protein	42.3077	9	9	182	20.7	8.18	0.92	0.992	0.935	0.949	0.992	1.07	1.044	1.03533	1.042	1.002	1.003	1.01567	1.09097	0.0529379	0.981005	0.498345	1.07025	0.0596711
F1PCJ7	Uncharacterized protein	42.2939	14	11	558	59.7	9.09	1.029	1.032	0.906	0.989	0.951	0.976	1.095	1.00733	1.077	0.941	0.993	1.00367	1.01854	0.778027	0.99636	0.953837	1.01483	0.81087
F1PPL5	Uncharacterized protein	42.2897	16	16	428	47.1	5.38	1.065	1.055	1.052	1.05733	0.999	0.955	0.969	0.974333	1	0.955	0.949	0.968	0.921501	0.0036088	0.9935	0.774635	0.915511	0.0057209
F1Q3G5	Uncharacterized protein	42.284	15	15	324	36.6	9.6	0.927	0.949	0.958	0.944667	1.007	1.013	1.012	1.01067	1.022	1.059	1.054	1.045	1.06987	0.002161	1.03397	0.0430279	1.10621	0.00247269
E2RNL3	Uncharacterized protein	42.2794	9	7	272	30.4	6.95	1.027	0.95	0.901	0.959333	1.049	1.006	1.018	1.02433	1.008	1.006	1.034	1.016	1.06776	0.169575	0.991865	0.622955	1.05907	0.207864
E2RKA9	Uncharacterized protein	42.2535	3	3	142	15.5	4.37	0.964	0.8	1.067	0.943667	1.028	0.907	1.06	0.998333	0.994	1.078	1.101	1.05767	1.05793	0.578942	1.05943	0.355309	1.12081	0.247536
E2RGK2	Adenylosuccinate lyase	42.2449	16	2	490	55.4	6.48	0.997	0.86	1.283	1.04667	1.085	0.754	1	0.946333	0.939	0.991	1.091	1.007	0.90414	0.562994	1.06411	0.606878	0.962102	0.779328
E2QVF9	Uncharacterized protein	42.1875	11	11	320	35.3	7.46	1.022	0.929	1.056	1.00233	0.961	0.844	0.958	0.921	1.114	1.059	1.058	1.077	0.918856	0.206978	1.16938	0.0217455	1.07449	0.151753
E2RQR0	Uncharacterized protein	42.1801	9	9	211	23.4	8.59	1.01	0.998	0.93	0.979333	0.955	1.019	1.005	0.993	1.039	1.017	1.028	1.028	1.01396	0.687568	1.03525	0.161949	1.04969	0.13126
J9NUM2	Uncharacterized protein	42.1687	10	9	332	37.2	5.71	1.037	0.904	1.098	1.013	1.002	0.797	1.026	0.941667	1.051	1.024	1.06	1.045	0.929582	0.483732	1.10973	0.232291	1.03159	0.612205
H9GW87	Transaldolase	42.1365	18	18	337	37.5	7.17	0.993	0.943	0.987	0.974333	1.013	0.961	1.061	1.01167	1.046	0.991	1.004	1.01367	1.03832	0.319831	1.00198	0.954996	1.04037	0.160838
F1PCT3	Tubulin gamma chain	42.1286	10	10	451	51.1	6.14	1.063	0.976	1.022	1.02033	1.006	1.084	0.991	1.027	0.93	0.98	0.949	0.953	1.00653	0.870075	0.927945	0.0837672	0.934008	0.0813137
F1Q0H1	Uncharacterized protein	42.1277	8	8	235	26.4	5.64	0.997	1.006	0.941	0.981333	0.983	1.057	0.967	1.00233	0.968	1.044	1.037	1.01633	1.0214	0.574308	1.01397	0.723185	1.03567	0.330791
F6Y5M8	Uncharacterized protein	42.1053	6	6	171	19	6.52	1.067	0.893	0.942	0.967333	1.031	0.998	1.009	1.01267	1.001	1.051	1.009	1.02033	1.04686	0.438194	1.00757	0.696635	1.05479	0.382505
E2R7S6	Uncharacterized protein	42.1053	4	4	133	15.2	5.22	0.867	1.06	0.924	0.950333	1.012	1.167	1.038	1.07233	1.008	0.928	0.995	0.977	1.12838	0.177585	0.911097	0.151986	1.02806	0.691052
F1PWL7	Uncharacterized protein	42.1053	9	9	361	37.6	7.25	0.864	0.994	1.002	0.953333	0.973	1.18	0.99	1.04767	0.957	1.031	1.008	0.998667	1.09895	0.303763	0.953229	0.521705	1.04755	0.414026
F1PLA8	Uncharacterized protein	42.1053	3	3	95	10.8	9.41	0.863	1.03	1.056	0.983	1.111	0.95	1.035	1.032	0.952	1.033	0.97	0.985	1.04985	0.5556	0.954457	0.421962	1.00203	0.977021
A0A0B4J194	Aspartate aminotransferase	42.093	20	20	430	47.4	9	0.99	1.001	0.959	0.983333	0.939	0.94	1.007	0.962	1.074	1.028	1.063	1.055	0.978305	0.454405	1.09667	0.0244849	1.07288	0.018645
E2RFR4	Uncharacterized protein	42.0814	9	4	221	24.6	4.96	1.074	1.047	0.995	1.03867	0.996	0.922	0.992	0.97	1.009	0.975	0.989	0.991	0.93389	0.10887	1.02165	0.46415	0.954108	0.131458
P61162	Alpha-centractin	42.0213	14	7	376	42.6	6.64	1.021	1.026	1.022	1.023	1.01	0.972	0.971	0.984333	0.994	0.995	0.988	0.992333	0.962203	0.0402935	1.00813	0.572192	0.970023	0.000326421
H9GWB6	Uncharacterized protein	42.0147	14	14	407	46.6	5.38	1.009	0.95	1.022	0.993667	0.992	0.942	1.019	0.984333	1.018	1.038	1.008	1.02133	0.990607	0.782521	1.03759	0.201297	1.02784	0.31046
E2RKR4	Proteasome subunit alpha type	41.9608	12	12	255	28.4	5.44	1.055	1.008	0.956	1.00633	0.959	0.983	1.026	0.989333	1.018	1	0.996	1.00467	0.983107	0.649515	1.0155	0.500633	0.998344	0.957483
E2R9K4	Uncharacterized protein	41.9234	35	35	1071	123.1	6.11	1.033	0.968	1.039	1.01333	1.002	0.928	1.004	0.978	1.021	0.999	1.006	1.00867	0.965132	0.354802	1.03136	0.300896	0.995395	0.853141
E2RQR5	Uncharacterized protein	41.9192	8	4	198	22.4	6.68	0.962	0.93	0.967	0.953	1.014	0.997	1.02	1.01033	1.022	1.073	1.015	1.03667	1.06016	0.0131326	1.02606	0.248905	1.08779	0.0180601
E2RR68	Uncharacterized protein	41.8792	29	28	745	84.3	5.9	1.026	0.995	1.019	1.01333	0.965	1.005	0.977	0.982333	1.016	0.996	1	1.004	0.969408	0.109624	1.02206	0.179488	0.990789	0.451532
F1Q0Z5	Signal recognition particle 9 kDa protein	41.8605	4	4	86	10.1	7.99	1.104	0.876	1.011	0.997	1.039	0.873	1.123	1.01167	1.002	1.002	0.97	0.991333	1.01471	0.889255	0.979901	0.797686	0.994316	0.936702
F1PHR6	Eukaryotic translation initiation factor 3 subunit L	41.844	22	22	564	66.7	6.34	0.979	0.999	1.011	0.996333	0.992	1.027	0.966	0.995	0.978	1.034	1.014	1.00867	0.998662	0.950012	1.01374	0.600959	1.01238	0.548762
F1PH90	Uncharacterized protein	41.8203	31	29	868	94	6.74	1.077	1.06	1.082	1.073	0.98	1.007	0.943	0.976667	0.909	0.971	0.971	0.950333	0.910221	0.00811497	0.973038	0.396704	0.885679	0.00483539
E2R2G5	Peptidylprolyl isomerase	41.8182	11	11	330	37.5	6.54	1.075	0.978	1.086	1.04633	1.065	0.915	1.038	1.006	0.935	0.98	0.93	0.948333	0.961453	0.521817	0.942677	0.302987	0.90634	0.0605983
E2QZT4	Uncharacterized protein	41.791	12	12	268	29.3	5.78	1.154	1.155	1.108	1.139	0.972	1.039	1.002	1.00433	0.814	0.89	0.866	0.856667	0.881768	0.00559153	0.85297	0.00758693	0.752122	0.000490984
E2RL57	Uncharacterized protein	41.7778	9	9	225	26.1	5.66	0.93	1.042	0.909	0.960333	1.014	1.111	1.028	1.051	1.011	0.977	0.978	0.988667	1.09441	0.151233	0.940691	0.125549	1.0295	0.543859
J9NUJ7	Uncharacterized protein	41.7355	7	7	242	27.6	7.17	0.963	1.018	0.972	0.984333	1.013	0.963	1.002	0.992667	1.078	0.991	0.999	1.02267	1.00847	0.733341	1.03022	0.396692	1.03894	0.304484
E2QV97	Uncharacterized protein	41.6816	21	19	559	64.2	6.38	0.979	0.967	1.001	0.982333	1.001	0.961	1.008	0.99	1.021	1.021	1.042	1.028	1.0078	0.687315	1.03838	0.0792312	1.04649	0.0199061
F1Q424	60S ribosomal protein L6	41.6667	13	8	288	32.6	10.65	0.998	1.012	0.923	0.977667	0.995	1.051	0.98	1.00867	1.022	1.018	1.001	1.01367	1.03171	0.42671	1.00496	0.83534	1.03682	0.273283
E2RMS5	Uncharacterized protein	41.6667	4	4	132	14.7	4.92	0.938	0.967	1.138	1.01433	1.001	1.106	0.994	1.03367	0.94	0.958	0.959	0.952333	1.01906	0.801979	0.921316	0.0912769	0.938876	0.378735
E2R4J2	Uncharacterized protein	41.63	13	13	454	50.5	9.39	0.933	0.978	0.981	0.964	0.943	1.042	1.042	1.009	1.036	1.005	1.039	1.02667	1.04668	0.284776	1.01751	0.637873	1.06501	0.0297404
F6X4J2	Uncharacterized protein	41.6185	32	30	1038	119.4	4.82	0.992	0.996	0.996	0.994667	1.032	1.02	1	1.01733	0.959	0.995	1.01	0.988	1.02279	0.0740214	0.971166	0.174321	0.993298	0.683436
F1Q3Y2	Uncharacterized protein	41.5789	17	14	570	61.8	6.54	1.012	0.979	1.063	1.018	1.033	0.923	0.995	0.983667	1.001	0.993	1.002	0.998667	0.966274	0.443971	1.01525	0.667282	0.981009	0.475848
F1PPF7	Uncharacterized protein	41.5094	35	29	954	106.4	7.33	0.936	0.944	0.935	0.938333	1.061	0.989	1.048	1.03267	1.025	1.021	1.04	1.02867	1.10053	0.0134408	0.996127	0.869799	1.09627	0.000150458
E2R513	Uncharacterized protein	41.4557	10	10	316	35.9	5.34	0.927	0.86	1.05	0.945667	1.066	0.967	0.994	1.009	1.001	1.065	1.069	1.045	1.06697	0.371605	1.03568	0.383983	1.10504	0.172253
E2R5E7	Uncharacterized protein	41.4508	5	5	193	21.6	8.31	0.961	1	0.967	0.976	0.993	1.01	1.006	1.003	1.036	1.029	0.997	1.02067	1.02766	0.109591	1.01761	0.247413	1.04577	0.0589287
E2QY30	Uncharacterized protein	41.4286	11	9	210	24.1	7.39	1.012	0.976	1.019	1.00233	0.944	1.069	1.021	1.01133	1.004	0.991	0.964	0.986333	1.00898	0.827811	0.97528	0.549191	0.984037	0.419122
F6X958	Serine/threonine-protein phosphatase	41.4239	10	1	309	35.6	5.43	0.9	0.932	1.005	0.945667	1.199	0.928	1.108	1.07833	0.887	1.046	0.995	0.976	1.14029	0.195576	0.9051	0.330172	1.03208	0.618236
E2RH37	GTP:AMP phosphotransferase AK3, mitochondrial	41.4097	9	9	227	25.3	9.44	0.94	0.971	0.911	0.940667	1.036	1.053	1.02	1.03633	1.045	0.99	1.033	1.02267	1.1017	0.00840765	0.986812	0.516389	1.08717	0.0270739
F1PI88	Uncharacterized protein	41.3793	14	14	348	38.2	6.46	1.018	1.027	0.975	1.00667	1.024	0.982	1.002	1.00267	0.989	1	0.984	0.991	0.996026	0.852063	0.988364	0.420778	0.984437	0.401974
F6Y290	Leukotriene A(4) hydrolase	41.3695	23	23	701	78.7	7.03	1.031	0.994	1.029	1.018	0.983	0.932	0.993	0.969333	1.031	1.007	0.999	1.01233	0.952194	0.0953796	1.04436	0.112367	0.994434	0.731339
E2RFB4	Uncharacterized protein	41.3603	17	17	544	58.9	4.36	0.997	0.968	0.989	0.984667	1.014	0.961	1.002	0.992333	1.027	1.023	1.02	1.02333	1.00779	0.695646	1.03124	0.127739	1.03927	0.0121247
E2R791	Elongation factor 1-alpha	41.3567	14	1	457	49.7	9.07	0.828	1.205	0.453	0.828667	1.128	1.128	1.157	1.13767	1.143	0.97	0.987	1.03333	1.37289	0.228089	0.908292	0.135362	1.24698	0.412487
F1PAH7	Uncharacterized protein	41.3462	32	32	936	105.3	7.55	0.893	0.929	0.954	0.925333	1.024	0.966	0.997	0.995667	1.091	1.057	1.09	1.07933	1.07601	0.0447751	1.08403	0.0142074	1.16643	0.00181872
F1Q2F6	Uncharacterized protein	41.3423	76	76	2518	273.3	6.43	1.061	1.011	1.048	1.04	0.986	0.966	0.939	0.963667	0.983	1.01	0.996	0.996333	0.926603	0.01959	1.0339	0.105806	0.958013	0.0609349
E2R4D5	Uncharacterized protein	41.3255	19	19	513	58.5	6.3	0.678	0.683	0.671	0.677333	1.023	0.951	2.193	1.389	0.707	1.075	1.019	0.933667	2.05069	0.151813	0.672186	0.337756	1.37844	0.0888121
E2RLU9	Uncharacterized protein	41.3223	7	7	242	25.6	7.37	1.027	0.973	0.931	0.977	1.028	0.939	1.021	0.996	1.055	0.998	1.029	1.02733	1.01945	0.658422	1.03146	0.395895	1.05152	0.194188
E2RBV0	Uncharacterized protein	41.3115	8	8	305	33.5	5.36	0.995	1.003	0.976	0.991333	1.066	1.114	1.047	1.07567	0.95	0.94	0.909	0.933	1.08507	0.0171689	0.867369	0.0036882	0.941157	0.0166079
E2RM09	Uncharacterized protein	41.3098	15	15	397	44.8	7.08	1.111	1.089	1.074	1.09133	0.972	1.026	0.987	0.995	0.902	0.928	0.911	0.913667	0.911729	0.0076064	0.918258	0.0102815	0.837202	0.000174925
E2R125	Perilipin	41.3093	14	14	443	47.9	6.34	0.986	1.042	0.951	0.993	0.961	1.044	1.018	1.00767	1.044	0.968	0.986	0.999333	1.01477	0.705324	0.99173	0.816143	1.00638	0.865372
F1PKR9	Uncharacterized protein	41.3026	44	44	1259	140.7	9.31	0.967	0.984	0.974	0.975	0.998	1.006	1.018	1.00733	1.014	1.019	1.019	1.01733	1.03316	0.0132475	1.00993	0.17348	1.04342	0.00124491
E2R8D8	Uncharacterized protein	41.2955	8	8	247	27.8	6.89	0.961	1.069	0.966	0.998667	1.062	1.097	1.039	1.066	0.931	0.955	0.921	0.935667	1.06742	0.159558	0.877736	0.00268072	0.936916	0.160424
E2RAV2	Uncharacterized protein	41.2926	62	1	2228	243.4	6.55	0.993	1.008	0.989	0.996667	0.985	1.022	0.973	0.993333	0.995	1.023	1.012	1.01	0.996656	0.843606	1.01678	0.378488	1.01338	0.252845
F1PQ79	Uncharacterized protein	41.2844	17	17	436	49.6	9.54	1.02	1.009	1.008	1.01233	0.962	0.963	0.98	0.968333	1.033	1.021	1.005	1.01967	0.956536	0.00325813	1.05301	0.00680924	1.00724	0.459764
F1PQS3	Uncharacterized protein	41.2399	15	14	371	41.1	5.68	0.998	0.961	1.007	0.988667	1.035	0.957	1.02	1.004	0.995	1	1.026	1.007	1.01551	0.609779	1.00299	0.912885	1.01854	0.342599
J9NX80	Uncharacterized protein	41.2151	21	21	609	66.2	9.7	1.009	1.077	1.008	1.03133	0.956	1.034	0.969	0.986333	0.995	0.958	0.995	0.982667	0.956367	0.247001	0.996283	0.898896	0.952812	0.134025
F1Q2T9	Uncharacterized protein	41.2037	8	2	216	24.5	5	0.851	1.185	0.828	0.954667	0.95	1.452	0.926	1.10933	0.964	0.929	0.914	0.935667	1.16201	0.495828	0.84345	0.370041	0.980098	0.878154
E2RHA5	Uncharacterized protein	41.1606	25	25	741	83.2	6.38	0.92	0.969	0.977	0.955333	1.024	1.018	1.012	1.018	0.997	1.05	1.033	1.02667	1.0656	0.0259928	1.00851	0.616883	1.07467	0.0395424
F1PJV5	Uncharacterized protein	41.1602	13	13	362	40.5	6.38	0.956	1.004	0.959	0.973	1.057	0.973	1.006	1.012	1.043	1.008	0.995	1.01533	1.04008	0.249164	1.00329	0.912	1.04351	0.115648
E2R541	Uncharacterized protein	41.1093	20	20	613	66.8	9.13	0.979	0.983	1.02	0.994	0.951	0.907	1.021	0.959667	1.076	1.02	1.041	1.04567	0.965459	0.390252	1.08961	0.0807194	1.05198	0.0688552
E2RPU0	Uncharacterized protein	41.0811	9	9	185	21.3	9.23	0.93	0.862	0.937	0.909667	1.044	0.915	1.002	0.987	1.032	1.137	1.141	1.10333	1.08501	0.160038	1.11787	0.0894073	1.2129	0.0107559
F1PGD7	Uncharacterized protein	41.0256	8	8	156	17.7	11.36	0.962	0.964	1.028	0.984667	0.905	1.014	0.939	0.952667	1.04	1.088	1.059	1.06233	0.967502	0.456014	1.11512	0.035356	1.07888	0.0394419
E2RJW8	Uncharacterized protein	41.0256	6	5	195	21.6	4.7	0.9	0.995	0.969	0.954667	0.958	0.938	0.999	0.965	1.126	1.02	1.095	1.08033	1.01082	0.773473	1.11952	0.0334209	1.13163	0.0412542
F6V1U9	DNA helicase	41.0197	29	29	863	96.8	6.77	0.994	0.981	1.035	1.00333	1.01	0.968	1.005	0.994333	1	1.006	1	1.002	0.99103	0.690052	1.00771	0.597734	0.998671	0.939088
E2R9G7	Uncharacterized protein	41.0112	7	7	178	20.2	9.6	0.981	0.985	0.946	0.970667	0.975	1.002	1.015	0.997333	1.017	1.033	1.046	1.032	1.02747	0.193785	1.03476	0.0745739	1.06319	0.0148526
J9NYJ7	Uncharacterized protein	41	2	2	100	10.8	4.09	0.832	0.938	0.946	0.905333	1.161	0.98	1.062	1.06767	1.08	0.971	1.029	1.02667	1.17931	0.0640507	0.961599	0.53877	1.13402	0.0662266
E2R297	Uncharacterized protein	40.9836	6	5	122	14.2	6.81	0.993	0.925	0.988	0.968667	1.104	1.08	1.042	1.07533	0.953	0.958	0.956	0.955667	1.11012	0.0197656	0.888717	0.00271747	0.986579	0.585195
F1PGP3	Uncharacterized protein	40.9692	8	8	227	24.7	8.29	1.096	1.006	1.023	1.04167	0.992	0.868	1.004	0.954667	1.007	0.979	1.025	1.00367	0.91648	0.166403	1.05133	0.341992	0.96352	0.283207
E2RP20	Perilipin	40.9396	15	15	447	48.9	5.44	0.785	0.717	0.801	0.767667	1.082	0.999	0.968	1.01633	1.102	1.293	1.253	1.216	1.32393	0.0043212	1.19646	0.041424	1.58402	0.00213572
E2RL03	ATP synthase-coupling factor 6, mitochondrial	40.9091	4	4	110	12.9	9.44	0.949	0.895	1.138	0.994	1.036	0.907	1.089	1.01067	1.007	1.022	0.958	0.995667	1.01677	0.864128	0.985158	0.806731	1.00168	0.983589
E2RIV1	AP complex subunit beta	40.9043	31	17	951	105.6	5.34	1.083	1.059	1.048	1.06333	0.923	0.936	0.98	0.946333	1.012	0.979	0.981	0.990667	0.889969	0.00434158	1.04685	0.0941824	0.931661	0.00810602
E2R5Q5	Uncharacterized protein	40.9018	20	18	621	69.7	6.15	1.035	1.017	0.974	1.00867	1.005	1.007	1.008	1.00667	0.974	0.989	0.991	0.984667	0.998017	0.917414	0.978146	0.0155177	0.976206	0.272421
E2RCN0	Uncharacterized protein	40.8696	5	5	115	12.3	6.68	0.958	0.95	0.921	0.943	0.979	1.006	1.029	1.00467	1.078	1.019	1.059	1.052	1.06539	0.0280788	1.04711	0.104396	1.11559	0.00623491
E2QYH0	Uncharacterized protein	40.824	8	8	267	28.7	8.38	0.986	1.04	0.962	0.996	1.052	1.061	0.996	1.03633	0.959	0.998	0.945	0.967333	1.0405	0.259829	0.933419	0.0554628	0.971218	0.363648
F1PYG5	Uncharacterized protein	40.8207	15	13	463	52.9	8.98	1.059	1.018	1.006	1.02767	0.932	0.97	0.968	0.956667	0.985	1.066	0.996	1.01567	0.930911	0.0247408	1.06167	0.104671	0.988323	0.709731
E2RLM4	Uncharacterized protein	40.7975	12	11	326	36.8	6.54	1.051	1.016	1.021	1.02933	1.035	1.041	1.033	1.03633	0.935	0.929	0.939	0.934333	1.0068	0.565533	0.901576	1.11106e-05	0.907707	0.00109893
E2RR74	Uncharacterized protein	40.7129	19	14	533	60	7.27	0.962	0.991	1.006	0.986333	0.976	0.932	1.021	0.976333	1.098	0.972	1.042	1.03733	0.989861	0.745551	1.06248	0.243148	1.05171	0.257636
J9NZT4	Uncharacterized protein	40.6863	34	1	816	95.3	6.86	0.968	1.041	0.954	0.987667	1.051	0.977	0.979	1.00233	0.992	1.009	1.028	1.00967	1.01485	0.707081	1.00732	0.79546	1.02227	0.489002
E2RIQ8	Uncharacterized protein	40.6863	8	8	204	22.9	9.72	0.952	0.95	0.956	0.952667	0.995	0.972	1.011	0.992667	1.062	1.041	1.062	1.055	1.04199	0.0250806	1.06279	0.00942112	1.10742	0.000143771
J9P2X4	Uncharacterized protein	40.6015	3	3	133	15.1	5.54	1.03	0.998	1.013	1.01367	1.022	1.055	1.032	1.03633	0.958	0.939	0.953	0.95	1.02236	0.167209	0.916693	0.00157861	0.937192	0.00421561
J9NS50	Uncharacterized protein	40.5941	3	3	101	11.1	6.52	1.01	0.977	1.043	1.01	0.94	0.964	1.012	0.972	1.034	1.03	0.99	1.018	0.962376	0.252981	1.04733	0.144416	1.00792	0.752385
E2QXD6	Uncharacterized protein	40.5797	16	16	483	53.2	8.88	1.019	1.01	1.005	1.01133	0.96	0.945	1.02	0.975	1.055	0.997	0.988	1.01333	0.964074	0.193553	1.03932	0.284918	1.00198	0.930003
E2QYW2	Uncharacterized protein	40.4959	3	3	121	13.6	4.84	1.136	0.782	1.344	1.08733	1.045	0.762	1.068	0.958333	0.944	0.958	0.959	0.953667	0.881361	0.537051	0.99513	0.964487	0.877069	0.461102
F1P9S0	Uncharacterized protein	40.407	9	9	344	37.7	4.59	1.018	1.08	0.98	1.026	1.029	1.056	1.034	1.03967	0.928	0.941	0.934	0.934333	1.01332	0.675331	0.898685	0.000318826	0.910656	0.0355415
E2RPE2	Peptidyl-prolyl cis-trans isomerase	40.3614	6	6	166	18.2	7.99	0.976	0.939	0.966	0.960333	0.97	1.004	1.097	1.02367	1.052	1.007	0.99	1.01633	1.06595	0.18441	0.992836	0.870555	1.05831	0.0601043
E2RLW5	Uncharacterized protein	40.3587	8	8	223	25.9	9.54	0.904	0.977	0.978	0.953	1.064	1.082	1.039	1.06167	1.002	0.98	0.973	0.985	1.11403	0.0167793	0.927786	0.00730348	1.03358	0.286037
E2RG67	Uncharacterized protein	40.3315	6	6	181	20.4	5.72	0.892	0.837	1.012	0.913667	1.076	0.802	1.043	0.973667	1.057	1.155	1.125	1.11233	1.06567	0.583136	1.14242	0.202617	1.21744	0.0284802
E2RFD0	Uncharacterized protein	40.3077	11	11	325	34.2	8.54	0.982	0.976	0.93	0.962667	1.029	0.932	1.026	0.995667	1.1	1.007	1.018	1.04167	1.03428	0.409179	1.0462	0.347957	1.08206	0.0785556
E2RPB3	Importin subunit alpha	40.3071	13	7	521	57.7	5.16	1.003	0.98	0.976	0.986333	1.037	1.036	1.031	1.03467	0.963	0.975	0.999	0.979	1.049	0.00495929	0.946198	0.00660204	0.992565	0.616333
E2R3U8	Uncharacterized protein	40.2913	9	9	206	23.7	5.2	1.15	1.044	1.095	1.09633	1.074	1.015	0.996	1.02833	0.887	0.899	0.841	0.875667	0.937975	0.152737	0.85154	0.00654232	0.798723	0.00335452
E2RLB2	Uncharacterized protein	40.2913	7	4	206	23.4	6.62	0.976	0.985	1.068	1.00967	1.043	0.99	0.975	1.00267	0.964	0.981	1.019	0.988	0.993067	0.854578	0.985372	0.606325	0.978541	0.552945
F1PDT8	WAP four-disulfide core domain protein 2	40.2878	3	3	139	14.6	5.74	1.633	1.245	1.556	1.478	0.929	0.777	0.743	0.816333	0.701	0.72	0.697	0.706	0.552323	0.00735773	0.864843	0.128031	0.477673	0.00289401
P61010	Signal recognition particle 54 kDa protein	40.2778	16	16	504	55.7	8.75	0.995	0.949	1.05	0.998	0.996	0.964	1.025	0.995	1.014	1.003	1.002	1.00633	0.996994	0.93412	1.01139	0.563748	1.00835	0.791221
J9P923	Uncharacterized protein	40.2564	16	16	390	43.4	5.44	0.93	0.972	0.993	0.965	0.987	1.013	1.003	1.001	1.023	1.017	1.062	1.034	1.03731	0.146366	1.03297	0.10831	1.0715	0.0413979
F1Q4J0	Uncharacterized protein	40.2542	28	1	944	106.3	6.06	0.645	0.856	0.918	0.806333	0.77	0.76	1.015	0.848333	1.539	1.144	1.353	1.34533	1.05209	0.738586	1.58585	0.0245164	1.66846	0.0186782
E2QUA8	Uncharacterized protein	40.2367	8	8	169	19.6	9.19	0.849	0.936	0.932	0.905667	1.051	1.025	1.088	1.05467	1.028	1.046	1.046	1.04	1.16452	0.0115427	0.986094	0.488317	1.14833	0.00977321
E2R4Q2	Uncharacterized protein	40.2299	8	7	261	29.7	5.78	0.891	1.005	0.931	0.942333	1.036	1.047	1.076	1.053	1.048	0.993	0.973	1.00467	1.11744	0.0354976	0.954099	0.129795	1.06615	0.196145
E2RPD7	Uncharacterized protein	40.2235	7	7	179	19.7	7.58	1.056	0.994	0.985	1.01167	1.04	0.934	1.015	0.996333	0.953	1.037	0.985	0.991667	0.984843	0.714303	0.995316	0.913352	0.980231	0.578555
J9PAP8	Uncharacterized protein	40.2235	10	10	358	39.4	8.1	0.992	1.067	1.011	1.02333	0.939	0.989	0.963	0.963667	1.012	0.998	1.029	1.013	0.941694	0.0895055	1.05119	0.0439821	0.989902	0.691721
F1PFN4	Uncharacterized protein	40.2123	35	2	848	99.1	7.2	0.986	0.977	0.974	0.979	1.005	1.022	0.976	1.001	0.991	1.041	1.028	1.02	1.02247	0.188761	1.01898	0.398391	1.04188	0.0563102
E2QVN6	Uncharacterized protein	40.1993	10	10	301	33.8	8.38	1.101	0.989	1.036	1.042	0.984	0.884	1.031	0.966333	1.01	0.981	0.986	0.992333	0.927383	0.234893	1.02691	0.588464	0.952335	0.214339
J9NUK4	Uncharacterized protein	40.1786	4	3	112	12.3	9.09	0.975	0.929	1.014	0.972667	1.108	1.08	1.082	1.09	0.891	0.998	0.921	0.936667	1.12063	0.0109578	0.859327	0.00980751	0.962988	0.421502
F1PRE1	Uncharacterized protein	40.1535	11	10	391	45.3	4.46	0.925	1.002	1.079	1.002	1.002	1.016	1.04	1.01933	0.994	0.949	0.993	0.978667	1.0173	0.724432	0.960105	0.0931622	0.976713	0.644703
J9JHI1	Uncharacterized protein	40.146	5	5	137	15	10.35	0.958	0.951	0.98	0.963	0.923	1.01	0.958	0.963667	1.049	1.1	1.073	1.074	1.00069	0.981305	1.11449	0.0195773	1.11526	0.00292156
E2RNE4	Uncharacterized protein	40.1198	15	15	501	54.8	4.64	0.973	0.931	0.95	0.951333	0.963	0.988	1.014	0.988333	1.048	1.079	1.053	1.06	1.03889	0.124558	1.07251	0.0151451	1.11423	0.00217153
J9P4M1	Uncharacterized protein	40.1198	15	14	501	56.1	6.96	0.954	1.016	0.965	0.978333	0.944	1.101	0.986	1.01033	1.005	1.013	1.016	1.01133	1.03271	0.56194	1.00099	0.984058	1.03373	0.163807
F1Q3W0	Uncharacterized protein	40.1022	30	28	783	86.3	6.06	0.99	0.998	0.969	0.985667	0.981	0.977	1.002	0.986667	1.032	1.024	1.028	1.028	1.00101	0.935523	1.04189	0.00693739	1.04295	0.00910592
E2RJA0	Uncharacterized protein	40.0763	18	13	524	57.9	5.77	0.962	0.999	1.01	0.990333	0.97	0.997	0.991	0.986	1.022	1.026	1.023	1.02367	0.995624	0.807698	1.0382	0.0103947	1.03366	0.0840287
M9PM25	RNA-binding protein Raly short isoform	40.0722	11	2	277	29.6	9.47	0.943	1.019	0.907	0.956333	0.959	1.055	1.04	1.018	1.052	0.99	1.035	1.02567	1.06448	0.237928	1.00753	0.837732	1.0725	0.140857
F6XHT8	Uncharacterized protein	40.0697	13	12	287	31.9	9.22	0.917	1.007	0.93	0.951333	1.022	1.116	1.013	1.05033	1.009	0.989	0.996	0.998	1.10406	0.0841173	0.950175	0.192776	1.04905	0.179153
E2QXL2	Uncharacterized protein	40.0534	24	1	749	83.4	6.99	1.027	1.007	1.055	1.02967	1.027	0.913	1.01	0.983333	0.986	1.003	0.972	0.987	0.955002	0.291225	1.00373	0.925063	0.958563	0.0615178
J9P1I9	Uncharacterized protein	40.0411	16	11	487	52	8.43	1.01	0.976	0.906	0.964	0.95	1.024	1.04	1.00467	1.013	1.054	1.027	1.03133	1.04219	0.380546	1.02654	0.427384	1.06985	0.110079
J9NXX3	Uncharacterized protein	40	5	5	110	12.4	8.41	1.025	0.981	1.035	1.01367	1.028	0.911	1.039	0.992667	0.993	1.036	0.953	0.994	0.979283	0.6594	1.00134	0.97893	0.980598	0.536807
E2RGG6	Eukaryotic translation initiation factor 3 subunit G	40	11	11	320	35.5	6.13	1.005	1.003	1.006	1.00467	1.018	1.038	0.997	1.01767	0.983	0.985	0.964	0.977333	1.01294	0.334936	0.960367	0.0412973	0.972794	0.0154797
E2RSA1	Uncharacterized protein	40	5	5	175	19.5	7.37	1.002	0.948	0.908	0.952667	1.178	1.065	1.094	1.11233	0.943	0.928	0.935	0.935333	1.1676	0.0213387	0.840875	0.00659934	0.981805	0.563769
F1PJ13	Succinyl-CoA:3-ketoacid-coenzyme A transferase	40	13	13	520	56.8	8.16	0.949	0.95	0.935	0.944667	1.014	0.962	1.037	1.00433	1.074	1.016	1.064	1.05133	1.06316	0.0583198	1.0468	0.174531	1.11291	0.00452965
M9PLJ9	RNA-binding protein Raly long isoform (Fragment)	40	10	1	280	30.3	8.72	0.828	1.043	0.917	0.929333	1.024	1.135	1.08	1.07967	1.063	0.957	0.955	0.991667	1.16176	0.0986517	0.918493	0.140372	1.06707	0.434594
F1PUL4	Uncharacterized protein	39.9323	23	23	591	64.6	8.65	1.028	1.037	0.975	1.01333	0.953	0.988	0.989	0.976667	1.036	1.002	0.991	1.00967	0.963816	0.181197	1.03379	0.140477	0.996382	0.884118
F1PTE3	Ras-related protein Rab-13	39.9015	8	5	203	22.7	9.29	1.051	0.969	1.051	1.02367	1.123	0.9	1.058	1.027	0.919	0.979	0.951	0.949667	1.00326	0.965116	0.9247	0.321701	0.927711	0.0841948
E2RPY1	Uncharacterized protein	39.8964	14	12	386	43.9	4.67	0.987	0.962	0.978	0.975667	0.936	0.958	1.043	0.979	1.032	1.072	1.032	1.04533	1.00342	0.925378	1.06776	0.132952	1.0714	0.0101717
F1PU02	Eukaryotic translation initiation factor 3 subunit F	39.8148	11	11	324	34.8	5.78	0.97	1.01	1.074	1.018	0.917	1.199	0.948	1.02133	0.934	0.972	0.976	0.960667	1.00327	0.97349	0.940601	0.538413	0.94368	0.158411
F1PTL7	Uncharacterized protein	39.8148	11	11	324	36.8	5.24	0.955	0.989	0.943	0.962333	1.036	0.981	1.003	1.00667	1.106	0.984	1.003	1.031	1.04607	0.103527	1.02417	0.585933	1.07135	0.163811
A0MZ32	MHC class I antigen (Fragment)	39.8058	6	0	206	23.4	5.69	1.377	1.359	1.184	1.30667	0.879	1.029	0.931	0.946333	0.717	0.774	0.752	0.747667	0.724235	0.00888354	0.790067	0.013405	0.572194	0.000932631
F1Q1B1	Uncharacterized protein	39.8058	3	2	103	11.6	5.27	0.912	0.92	0.891	0.907667	1.162	1.065	0.936	1.05433	0.963	1.079	1.072	1.038	1.16159	0.0904798	0.984508	0.83924	1.14359	0.0277337
E2QX53	Glucosamine-6-phosphate isomerase	39.7924	10	7	289	32.6	6.74	1.03	0.949	0.969	0.982667	0.967	0.915	0.992	0.958	1.015	1.126	1.037	1.05933	0.974898	0.499774	1.10578	0.0680059	1.07802	0.140351
E2RD92	Uncharacterized protein	39.7924	11	11	289	32	5.41	0.944	0.953	0.953	0.95	1.014	1.018	1.021	1.01767	1.018	1.054	1.025	1.03233	1.07123	4.82709e-05	1.01441	0.260693	1.08667	0.0019631
J9P4L2	Uncharacterized protein	39.7906	12	12	382	41.6	8.92	0.969	0.958	1.006	0.977667	1.001	1.008	1.018	1.009	1.025	1.01	1.006	1.01367	1.03205	0.110506	1.00463	0.572453	1.03682	0.0826099
E2RCN2	Uncharacterized protein	39.7468	14	14	395	45.1	9.09	1.027	0.991	0.998	1.00533	0.992	1.006	0.994	0.997333	0.983	1.002	1.007	0.997333	0.992042	0.536805	1	1	0.992042	0.577862
J9NU70	Uncharacterized protein	39.726	3	3	73	8.5	8.44	1.457	1.093	1.335	1.295	0.867	0.778	1.047	0.897333	0.781	0.844	0.797	0.807333	0.692921	0.040381	0.899703	0.330631	0.623423	0.0109094
F1PUB5	Proteasome endopeptidase complex	39.726	8	5	219	24.6	8.7	0.994	0.985	0.954	0.977667	1.076	1.046	1.027	1.04967	0.936	1.033	0.948	0.972333	1.07364	0.0183442	0.926326	0.0834064	0.994545	0.878886
E2RK38	Uncharacterized protein	39.6104	18	1	462	50	9.03	0.909	0.723	1.313	0.981667	0.96	0.545	1.166	0.890333	1.081	1.164	1.139	1.128	0.906961	0.73571	1.26694	0.266642	1.14907	0.452185
E2R020	Uncharacterized protein	39.6078	8	7	255	28.2	7.84	1.008	1.004	0.967	0.993	1.031	0.968	1.007	1.002	1.019	0.998	0.999	1.00533	1.00906	0.709888	1.00333	0.873149	1.01242	0.449671
F1P912	Uncharacterized protein	39.5706	19	1	326	37.4	4.7	0.993	0.944	1.081	1.006	1.033	1.019	1.009	1.02033	0.95	0.977	0.994	0.973667	1.01425	0.742355	0.954263	0.032873	0.96786	0.485082
F1P624	Uncharacterized protein	39.5695	43	41	1208	133.8	5.8	1.039	0.996	0.99	1.00833	0.971	0.936	1.007	0.971333	1.023	1.022	1.016	1.02033	0.963306	0.222716	1.05045	0.0762244	1.0119	0.484265
F1PWA9	Uncharacterized protein	39.5664	14	14	369	41.9	8.16	0.966	1.045	1.085	1.032	1.009	1.065	0.929	1.001	0.943	0.977	0.982	0.967333	0.969961	0.588137	0.966367	0.46094	0.937339	0.155824
J9P8W9	Uncharacterized protein	39.5509	20	16	579	63.7	8.87	0.98	0.988	0.975	0.981	0.982	0.955	1.008	0.981667	1.049	1.038	1.024	1.037	1.00068	0.96829	1.05637	0.0308069	1.05708	0.00236616
J9P2L3	Uncharacterized protein	39.539	20	19	564	62	8.22	0.985	0.998	0.952	0.978333	0.984	0.966	1.007	0.985667	1.071	1.009	1.028	1.036	1.0075	0.706352	1.05107	0.0825444	1.05894	0.0653767
J9NTR8	Eukaryotic translation initiation factor 3 subunit H	39.5225	13	13	377	42.8	6.76	1.057	1	0.984	1.01367	0.998	1.006	1.003	1.00233	0.982	0.999	0.971	0.984	0.988819	0.637694	0.981709	0.0964617	0.970733	0.277182
E2QWU0	Actin-related protein 2/3 complex subunit 4	39.521	6	6	167	19.5	8.43	1.096	1.032	0.897	1.00833	0.861	1.057	1.011	0.976333	0.978	1.082	0.986	1.01533	0.968264	0.720469	1.03995	0.59677	1.00694	0.922399
E2R002	Uncharacterized protein	39.5137	12	11	329	35.7	8.32	1.075	0.993	1.092	1.05333	1.069	0.983	0.964	1.00533	0.926	0.966	0.932	0.941333	0.95443	0.341156	0.93634	0.138208	0.893671	0.0274389
F1PE53	Uncharacterized protein	39.51	51	44	1306	151.7	5.82	1.04	0.996	1.014	1.01667	0.995	0.962	1	0.985667	0.998	1.001	0.994	0.997667	0.969508	0.150663	1.01217	0.377188	0.981311	0.215689
F1PEL5	Uncharacterized protein	39.4737	14	14	418	47.6	5.03	1.041	1.009	1.022	1.024	1.026	1.051	1.108	1.06167	0.908	0.909	0.925	0.914	1.03678	0.220749	0.860911	0.0040413	0.892578	0.000523674
F1Q2Y7	Uncharacterized protein	39.4737	6	6	114	12.7	5.12	1.028	1.045	0.944	1.00567	1.028	1.052	1.075	1.05167	0.936	0.949	0.943	0.942667	1.04574	0.247983	0.896355	0.00149943	0.937355	0.115667
E2RPH1	Uncharacterized protein	39.4366	4	4	142	16.3	4.79	0.931	1.066	1.001	0.999333	0.943	1.048	0.997	0.996	0.971	1.023	1.019	1.00433	0.996664	0.949421	1.00837	0.821584	1.005	0.911831
J9P4B9	Uncharacterized protein	39.4286	5	3	175	19.9	5.05	0.983	0.976	1.043	1.00067	1.022	0.966	1.018	1.002	1.01	1.015	0.968	0.997667	1.00133	0.964153	0.995675	0.86208	0.997002	0.913588
E2QV28	Uncharacterized protein	39.4161	4	4	137	16.2	8.46	1.002	0.946	0.938	0.962	1.059	0.942	1.071	1.024	1.044	0.984	1.014	1.014	1.06445	0.24733	0.990234	0.833734	1.05405	0.121838
E2R0A6	Uncharacterized protein	39.4161	7	7	137	15.7	12.02	0.949	1.014	0.978	0.980333	0.938	0.945	0.968	0.950333	1.124	1.021	1.062	1.069	0.969398	0.223956	1.12487	0.0192079	1.09045	0.0661918
E2RSV9	Uncharacterized protein	39.3873	15	15	457	53.1	5.11	1.065	1.11	1.045	1.07333	0.899	0.911	0.878	0.896	1.033	1.018	1.042	1.031	0.834783	0.00117947	1.15067	0.00034607	0.960559	0.107292
E2R4F5	60S ribosomal protein L13	39.3365	10	10	211	24.3	11.65	0.914	0.989	0.948	0.950333	0.975	0.996	1.011	0.994	1.042	1.098	1.027	1.05567	1.04595	0.143785	1.06204	0.0619827	1.11084	0.0262626
E2RR50	Uncharacterized protein	39.3305	16	16	478	53.9	6.74	1.006	1.005	0.999	1.00333	0.953	0.962	0.976	0.963667	1.033	1.037	1.029	1.033	0.960465	0.0048813	1.07195	0.000609055	1.02957	0.000734721
F1Q147	Uncharacterized protein	39.3227	33	31	1063	121.9	9.35	0.989	1.024	1.018	1.01033	0.997	1.005	0.977	0.993	0.988	0.986	1.015	0.996333	0.982844	0.272755	1.00336	0.803231	0.986143	0.382721
E2RFZ0	Uncharacterized protein	39.3204	4	4	206	22.1	4.96	1.043	0.916	1.126	1.02833	1.007	0.778	1.109	0.964667	0.962	1.059	1	1.007	0.938088	0.610389	1.04388	0.699014	0.979254	0.767004
F1PY49	Uncharacterized protein	39.2958	23	19	710	79.9	7.2	1.003	0.993	0.955	0.983667	1.04	0.99	0.994	1.008	1.014	1.005	1.005	1.008	1.02474	0.325005	1	1	1.02474	0.178373
E2RM49	Uncharacterized protein	39.2941	14	7	425	47.8	5.05	1.09	1.106	1.031	1.07567	0.989	0.99	0.976	0.985	0.987	0.879	0.952	0.939333	0.915711	0.0175405	0.953638	0.228296	0.873257	0.0252853
F1P9U2	Uncharacterized protein	39.2908	25	25	705	78.2	7.08	1.031	0.993	1.008	1.01067	1.017	0.928	0.998	0.981	1.01	0.976	1.039	1.00833	0.970646	0.367548	1.02786	0.449162	0.997691	0.918033
E2RLE2	40S ribosomal protein S27	39.2857	4	4	84	9.5	9.45	1.017	0.848	1.125	0.996667	0.955	0.839	0.908	0.900667	1.128	1.042	1.139	1.103	0.903679	0.333522	1.22465	0.0113193	1.10669	0.285099
F2Z4N7	Uncharacterized protein	39.2573	14	1	377	42	5.39	0.772	0.927	1.142	0.947	0.992	1.293	0.908	1.06433	0.94	1.037	0.989	0.988667	1.1239	0.5006	0.928907	0.563134	1.044	0.726139
E2R2C3	Glucose-6-phosphate isomerase	39.2473	19	19	558	62.8	7.93	1.002	1.049	0.992	1.01433	0.951	0.941	0.999	0.963667	1.086	0.982	0.997	1.02167	0.950049	0.113516	1.06019	0.192686	1.00723	0.852195
E2R2U3	Uncharacterized protein	39.2453	28	27	795	91	7.34	0.991	0.972	0.995	0.986	0.979	1.004	0.987	0.99	0.987	1.061	1.024	1.024	1.00406	0.715743	1.03434	0.206882	1.03854	0.166645
E2QXN8	Annexin	39.2079	18	17	505	54.4	7.65	0.954	0.954	1.013	0.973667	0.988	1.021	0.991	1	1.047	1.013	1.019	1.02633	1.02705	0.30328	1.02633	0.15104	1.05409	0.0773687
J9P1U4	Uncharacterized protein	39.154	59	3	1844	208.3	5.3	1.018	1.05	1.023	1.03033	0.949	0.963	0.996	0.969333	1.045	0.968	0.989	1.00067	0.940796	0.0234946	1.03232	0.308423	0.971207	0.301654
E2QT37	Uncharacterized protein	39.1304	16	16	460	49	7.66	1.012	0.989	0.974	0.991667	1.05	1.017	1.017	1.028	0.994	0.943	1.003	0.98	1.03664	0.08023	0.953307	0.0912115	0.988235	0.619426
F1Q3C4	Uncharacterized protein	39.1111	8	8	225	26.4	7.47	0.974	1.047	0.996	1.00567	0.994	1.081	1.009	1.028	1.01	0.954	0.936	0.966667	1.02221	0.5524	0.940337	0.153609	0.96122	0.277415
J9NXE3	Poly [ADP-ribose] polymerase	39.0947	32	32	972	108.3	8.9	1.038	0.995	1.051	1.028	1.031	0.961	0.992	0.994667	0.966	0.992	0.973	0.977	0.967575	0.275165	0.982239	0.461061	0.950389	0.0519515
E2QX84	Uncharacterized protein	39.0895	25	10	637	69.8	5.67	1.037	1.022	0.975	1.01133	0.978	1.004	0.999	0.993667	1.015	0.968	1.001	0.994667	0.982531	0.433327	1.00101	0.953305	0.98352	0.513951
F1PJT2	Uncharacterized protein	39.0887	26	26	834	88.3	5.66	1.045	1.066	1.029	1.04667	1.001	1.039	0.994	1.01133	0.94	0.956	0.931	0.942333	0.966242	0.115314	0.931773	0.0119338	0.900318	0.00129645
E2RGG9	Uncharacterized protein	39.0756	15	15	476	53.8	6.48	0.993	0.971	0.984	0.982667	1.011	0.942	0.981	0.978	1.077	1.018	1.022	1.039	0.995251	0.834802	1.06237	0.0915482	1.05733	0.0485251
P62999	Ras-related C3 botulinum toxin substrate 1	39.0625	8	0	192	21.4	8.5	1.173	0.891	1.03	1.03133	0.908	0.843	1.05	0.933667	0.985	1.098	1.022	1.035	0.905301	0.391681	1.10853	0.219026	1.00356	0.968741
E2RRM7	Uncharacterized protein	39.0625	5	5	128	14.2	8.46	1.07	0.944	0.946	0.986667	1.011	1.008	0.957	0.992	1.006	1.041	1.018	1.02167	1.00541	0.911769	1.02991	0.217867	1.03547	0.460548
E2RBT1	Uncharacterized protein	39.0625	7	7	192	20.6	9.88	1.004	0.963	0.933	0.966667	1.112	1.068	1.087	1.089	0.975	0.907	0.952	0.944667	1.12655	0.00720828	0.867463	0.00366911	0.977241	0.485723
E2RSI5	Uncharacterized protein	39.0593	14	13	489	53.6	6.74	1.076	0.988	0.929	0.997667	0.859	0.923	1.01	0.930667	1.092	1.046	1.077	1.07167	0.932843	0.334741	1.1515	0.0369972	1.07417	0.173966
F1Q1V0	Uncharacterized protein	39.0545	33	33	973	110.5	5.71	1.011	1.008	1.007	1.00867	1.04	0.943	0.992	0.991667	0.989	1.014	0.997	1	0.983146	0.576895	1.0084	0.7878	0.991408	0.310411
E2RTB5	Uncharacterized protein	39.0244	4	4	82	9.7	10.15	0.889	0.936	0.843	0.889333	1.042	1.067	1.023	1.044	1.111	1.01	1.08	1.067	1.17391	0.00649553	1.02203	0.517895	1.19978	0.011479
J9P3K0	Uncharacterized protein	39.0102	66	65	2061	234.4	6.11	0.986	1.037	1.001	1.008	0.966	0.97	0.981	0.972333	1.046	0.99	1.023	1.01967	0.964616	0.0867017	1.04868	0.0484342	1.01157	0.627095
F1P892	Transcription and mRNA export factor ENY2	39	4	4	100	11.4	9.1	1.149	1.073	1.013	1.07833	1.01	0.871	0.99	0.957	0.955	0.974	0.965	0.964667	0.887481	0.107049	1.00801	0.869351	0.89459	0.0458876
E2R8L3	Uncharacterized protein	38.9864	15	15	513	55.9	6.61	1.009	0.95	0.949	0.969333	0.948	1.006	1.01	0.988	1.042	1.05	1.036	1.04267	1.01926	0.544088	1.05533	0.0555427	1.07565	0.0223143
J9PB88	Flap endonuclease 1	38.9474	13	13	380	42.6	8.48	0.994	0.98	1.015	0.996333	1.026	0.989	1.014	1.00967	1.002	0.982	0.999	0.994333	1.01338	0.421648	0.984813	0.288939	0.997993	0.874953
J9NXV2	Uncharacterized protein	38.9367	82	82	2671	292.6	7.4	1.034	1.001	1.034	1.023	0.981	0.925	0.971	0.959	1.008	1.013	1.032	1.01767	0.937439	0.035216	1.06117	0.0351044	0.994787	0.707013
E2RT47	Uncharacterized protein	38.9222	11	11	334	37.7	7.12	1.004	1.001	1.018	1.00767	1.026	1.01	1.004	1.01333	1.003	0.948	0.986	0.979	1.00562	0.536897	0.966118	0.121821	0.971551	0.168605
F1PVY1	Uncharacterized protein	38.8889	4	4	108	12.9	6.58	0.967	0.946	1	0.971	1.106	1.062	1.068	1.07867	0.969	0.951	0.931	0.950333	1.11088	0.00673651	0.881026	0.00188573	0.978716	0.34165
E2RHW7	Uncharacterized protein	38.8658	25	24	723	83.6	6.92	1.013	0.959	1.027	0.999667	1.041	0.932	1	0.991	0.992	1.024	1.012	1.00933	0.99133	0.830553	1.0185	0.609455	1.00967	0.692578
F1PCV4	Uncharacterized protein	38.7755	3	3	147	16	4.86	0.822	0.846	0.868	0.845333	1.081	0.912	1.054	1.01567	1.145	1.09	1.182	1.139	1.2015	0.0345119	1.12143	0.1041	1.3474	0.000598332
E2RRJ6	AP complex subunit beta	38.7646	29	15	939	103.6	5.16	0.955	0.968	1.028	0.983667	1.013	0.99	1.017	1.00667	1.006	1.045	0.977	1.00933	1.02338	0.392247	1.00265	0.906937	1.02609	0.43895
J9P309	Actin-related protein 2/3 complex subunit 3	38.764	7	7	178	20.5	8.59	0.922	0.91	1.007	0.946333	1.085	0.981	1.011	1.02567	0.989	1.142	0.952	1.02767	1.08383	0.141855	1.00195	0.977228	1.08595	0.283321
F1P8D3	Uncharacterized protein	38.7283	8	8	346	36.9	6.87	0.993	1.021	0.883	0.965667	1.08	1.012	1.035	1.04233	1.018	0.972	0.986	0.992	1.07939	0.17535	0.951711	0.10571	1.02727	0.583903
E2RAI8	Uncharacterized protein	38.7097	17	14	527	58	6.49	1.031	1.037	0.937	1.00167	0.952	0.949	1.01	0.970333	1.055	1.021	1.007	1.02767	0.968719	0.455742	1.05909	0.0788541	1.02596	0.503142
F1PUE2	Uncharacterized protein	38.6831	16	13	486	55.9	5.17	1.006	1.024	1.008	1.01267	1.042	0.95	1.001	0.997667	1.004	0.976	0.988	0.989333	0.985188	0.610834	0.991647	0.779436	0.976959	0.0781428
F1P8Z9	Uncharacterized protein	38.6617	9	9	269	30.1	5.82	0.932	1.02	0.896	0.949333	1.012	1.071	1.015	1.03267	1.057	0.987	1.009	1.01767	1.08778	0.115233	0.985474	0.622952	1.07198	0.180964
J9P7X5	Uncharacterized protein	38.6555	23	12	714	77.2	6.19	1.077	1.021	1.054	1.05067	1.024	0.928	0.99	0.980667	0.964	0.945	0.997	0.968667	0.933376	0.0972964	0.987763	0.726262	0.921954	0.0210919
E2RB90	Uncharacterized protein	38.6473	11	9	414	45.6	5.49	0.959	0.961	1.054	0.991333	1.02	0.999	0.995	1.00467	0.996	1.004	1.012	1.004	1.01345	0.70078	0.999336	0.944659	1.01278	0.709688
E2QWF8	40S ribosomal protein S24	38.6364	5	5	132	15.2	10.9	0.945	1.026	0.952	0.974333	0.813	1.16	0.987	0.986667	1.025	1.064	1.028	1.039	1.01266	0.910864	1.05304	0.631533	1.06637	0.0879643
E2QUL2	Uncharacterized protein	38.6139	4	4	101	11.5	8.21	1.039	0.97	0.955	0.988	1.132	1.067	1.027	1.07533	0.97	0.912	0.928	0.936667	1.08839	0.0947599	0.871048	0.016882	0.948043	0.174324
F1P694	Uncharacterized protein	38.6139	5	5	202	21.6	4.74	0.955	0.958	1.125	1.01267	1.008	1.007	1.024	1.013	0.93	1.008	0.985	0.974333	1.00033	0.995571	0.96183	0.179361	0.962146	0.562314
F1PXQ9	Uncharacterized protein	38.5816	21	20	705	80	7.31	0.99	1.051	1.003	1.01467	1.003	1.01	0.965	0.992667	0.975	1.008	0.994	0.992333	0.978318	0.397208	0.999664	0.985241	0.977989	0.344842
J9NRP8	Uncharacterized protein	38.5714	12	11	350	40.1	6.92	1.013	1.027	0.967	1.00233	1.021	1.043	1.021	1.02833	0.996	0.944	0.967	0.969	1.02594	0.25432	0.942301	0.0239027	0.966744	0.22993
J9NSM2	Uncharacterized protein	38.5542	3	3	83	9.5	9.63	0.838	0.898	0.891	0.875667	0.925	0.993	0.99	0.969333	1.231	1.135	1.1	1.15533	1.10697	0.032556	1.19188	0.0144613	1.31938	0.00300984
F1PRT4	Uncharacterized protein	38.5519	20	20	511	57.2	6.21	1.038	1.006	1.015	1.01967	0.946	0.986	0.982	0.971333	1.02	1.009	0.998	1.009	0.952599	0.038351	1.03878	0.0570122	0.989539	0.4043
E2R068	Uncharacterized protein	38.5204	17	16	392	42.4	10.08	0.942	0.963	0.907	0.937333	1.023	1.049	1.057	1.043	1.03	1.016	1.013	1.01967	1.11273	0.00540664	0.977629	0.11286	1.08784	0.00864839
F6ULR2	Uncharacterized protein	38.4615	11	11	364	39.8	7.12	1.089	1.029	1.071	1.063	1.036	0.937	1.004	0.992333	0.956	0.906	0.972	0.944667	0.933521	0.107375	0.951965	0.248222	0.88868	0.0113559
E2RPJ4	Uncharacterized protein	38.4615	18	18	637	72.8	5.87	1.019	1.026	1.009	1.018	1.047	1.017	1.053	1.039	0.961	0.942	0.927	0.943333	1.02063	0.159754	0.907924	0.00299374	0.926654	0.00246374
F1PP40	Uncharacterized protein	38.4615	6	6	208	22.6	8.72	0.995	1.041	1.025	1.02033	0.964	0.944	0.99	0.966	1.066	0.969	1.007	1.014	0.946749	0.0455989	1.04969	0.198805	0.993793	0.849404
F6XJB3	Uncharacterized protein	38.4416	10	10	385	42.6	6.8	0.973	0.981	0.962	0.972	0.891	1	1.059	0.983333	1.074	1.017	1.042	1.04433	1.01166	0.830185	1.06203	0.30504	1.07442	0.0141537
E2RPP2	Uncharacterized protein	38.3966	8	3	237	27.2	9.55	1.107	1.023	1.019	1.04967	0.779	0.84	0.97	0.863	1.11	1.001	1.15	1.087	0.822166	0.0418385	1.25956	0.0355283	1.03557	0.519781
F1PBT3	Fructose-bisphosphate aldolase	38.3738	22	3	701	74.9	7.44	1.122	1.033	1.011	1.05533	0.971	0.958	0.987	0.972	1.013	0.95	0.956	0.973	0.921036	0.0756521	1.00103	0.965542	0.921984	0.105035
L7N0I9	D-3-phosphoglycerate dehydrogenase	38.2867	20	20	572	61	8.22	1	1.01	0.973	0.994333	0.991	1.032	1.003	1.00867	1.025	0.975	0.991	0.997	1.01442	0.432452	0.988434	0.574642	1.00268	0.891917
E2QW06	Uncharacterized protein	38.2812	11	11	256	28.8	9.35	0.937	1.01	0.942	0.963	0.968	1.063	1.013	1.01467	1.037	0.99	1.041	1.02267	1.05365	0.226191	1.00788	0.814627	1.06196	0.105957
F6PMP8	Uncharacterized protein	38.2716	9	9	243	26.8	6.54	0.932	0.947	0.964	0.947667	1.05	0.973	1.052	1.025	1.056	0.976	1.049	1.027	1.0816	0.0487171	1.00195	0.958905	1.08371	0.0433825
J9PAY8	DNA topoisomerase 2	38.2219	55	45	1541	175.8	8.82	1.121	1.079	1.138	1.11267	0.857	0.923	0.792	0.857333	0.936	1.081	1.073	1.03	0.770521	0.0035985	1.2014	0.0459213	0.925704	0.175072
E2QYD2	Uncharacterized protein	38.1579	14	14	380	40.6	8.56	0.911	0.978	0.933	0.940667	1.018	1.032	1.001	1.017	1.071	1.031	1.025	1.04233	1.08115	0.0243548	1.02491	0.210281	1.10808	0.0141433
Q9N1Q3	Y-box protein ZONAB-A	38.1579	6	0	304	31.9	9.58	0.825	1	1.009	0.944667	0.889	1.46	1.035	1.128	0.896	0.964	0.922	0.927333	1.19407	0.369435	0.822104	0.309155	0.981651	0.797095
E2RR77	Ribosomal protein L37	38.1443	6	6	97	11.1	11.74	0.856	1.14	0.985	0.993667	0.852	0.915	0.99	0.919	1.229	0.952	1.08	1.087	0.924857	0.459263	1.18281	0.133495	1.09393	0.461318
E2R9R6	Uncharacterized protein	38.1215	5	5	181	20.9	5.19	1.027	0.998	1.1	1.04167	1.012	0.972	1.018	1.00067	0.953	0.962	0.959	0.958	0.96064	0.289441	0.957362	0.0438166	0.91968	0.0515425
J9NZX5	Uncharacterized protein	38.0769	9	8	260	29.4	9.39	0.912	0.989	0.922	0.941	1.028	1.075	1.01	1.03767	1.029	1.017	1.018	1.02133	1.10273	0.0355175	0.98426	0.454801	1.08537	0.0304427
F1PSC0	Uncharacterized protein	38.0741	20	16	675	74.2	8.62	0.93	0.961	0.978	0.956333	1.008	1.067	1.013	1.02933	1.015	1.018	1.012	1.015	1.07633	0.0361912	0.986075	0.491908	1.06135	0.0143327
E2QYP1	Uncharacterized protein	38.0697	12	5	373	38.8	9.11	1.001	0.941	1.003	0.981667	1.161	1.01	0.979	1.05	0.957	0.959	0.988	0.968	1.06961	0.3168	0.921905	0.22434	0.986078	0.579183
E2RSJ0	Uncharacterized protein	38.0282	5	5	142	17	6.18	1.034	1.019	1.11	1.05433	0.896	0.968	0.988	0.950667	0.973	1.034	0.978	0.995	0.901676	0.0592283	1.04663	0.263416	0.943724	0.158616
J9NV86	Uncharacterized protein	38.0282	5	5	142	16.7	5.29	0.92	1.031	0.972	0.974333	0.995	1.09	1.03	1.03833	1.005	0.992	0.965	0.987333	1.06569	0.205674	0.950883	0.165848	1.01334	0.722873
F1PM93	Uncharacterized protein	38.0184	15	9	434	49.5	6.67	1.046	0.986	1.062	1.03133	0.985	0.893	1.018	0.965333	1.017	0.996	0.997	1.00333	0.936005	0.207799	1.03936	0.374132	0.972851	0.310298
F1PZ90	Uncharacterized protein	38.0018	40	40	1121	123.4	7.75	1.104	1.032	1.037	1.05767	0.853	0.888	0.786	0.842333	1.035	1.148	1.117	1.1	0.796407	0.00472389	1.3059	0.00463321	1.04003	0.359413
F6UTB0	Uncharacterized protein	38	18	17	550	61.8	8.98	0.966	0.96	0.931	0.952333	0.981	0.989	0.999	0.989667	1.027	1.092	1.056	1.05833	1.0392	0.0357917	1.06938	0.0244511	1.11131	0.0081122
E2QU31	Uncharacterized protein	37.9921	17	17	508	57.4	8.12	1.028	0.993	0.923	0.981333	0.992	1.03	0.975	0.999	1.003	1.034	1.024	1.02033	1.018	0.639216	1.02135	0.31645	1.03974	0.292364
F1PXX5	DnaJ homolog subfamily B member 11	37.9888	11	11	358	40.5	6.32	0.981	0.994	0.931	0.968667	0.988	1.04	1.011	1.013	1.024	1.014	1.018	1.01867	1.04577	0.143323	1.00559	0.730259	1.05162	0.061693
E2RF98	Uncharacterized protein	37.9538	9	9	303	33.8	6.74	1.003	0.947	1.054	1.00133	0.97	0.852	0.989	0.937	1.068	1.042	1.077	1.06233	0.935752	0.29025	1.13376	0.0468282	1.06092	0.134941
F1P7J0	Uncharacterized protein	37.9363	25	24	659	70.7	9.45	0.997	0.931	1.058	0.995333	1.009	1.002	0.995	1.002	1.008	0.988	1.012	1.00267	1.0067	0.865388	1.00067	0.940922	1.00737	0.854165
J9NY44	Uncharacterized protein	37.931	5	1	145	16.4	8.09	0.969	1.077	0.91	0.985333	1.044	1.051	0.986	1.027	1.041	0.977	0.945	0.987667	1.04229	0.476178	0.961701	0.323244	1.00237	0.969013
F1PYQ1	Ras-related C3 botulinum toxin substrate 1	37.9147	8	1	211	23.5	8.48	1.039	0.966	1.022	1.009	0.962	0.936	0.99	0.962667	1.015	1.038	1.031	1.028	0.95408	0.161393	1.06787	0.0184566	1.01883	0.456621
E2QTP2	Uncharacterized protein	37.9032	13	5	372	43.4	6.92	1.085	0.932	1.035	1.01733	1.055	0.898	1.02	0.991	0.977	1.011	0.988	0.992	0.974115	0.708305	1.00101	0.984578	0.975098	0.612195
J9P550	Uncharacterized protein	37.9032	6	1	248	27.2	6.24	0.982	0.986	0.941	0.969667	0.939	1.055	1.034	1.00933	0.962	1.064	1.036	1.02067	1.04091	0.360794	1.01123	0.820919	1.0526	0.204239
H9GW57	Uncharacterized protein	37.8788	8	8	198	22.4	6.55	1.011	0.963	1.019	0.997667	1.049	1.029	0.996	1.02467	0.984	0.972	0.977	0.977667	1.02706	0.311652	0.954131	0.0412558	0.979953	0.324759
E2RJ79	Uncharacterized protein	37.8205	10	10	312	34.4	9.47	0.947	0.998	0.937	0.960667	0.933	1.024	0.991	0.982667	1.05	1.055	1.065	1.05667	1.0229	0.537036	1.07531	0.0516542	1.09993	0.00776475
F2Z4P1	Tubulin beta chain	37.7778	13	1	450	50.4	4.93	0.638	1.049	0.57	0.752333	0.9	3.579	0.634	1.70433	0.591	0.575	0.464	0.543333	2.2654	0.374037	0.318795	0.284959	0.722198	0.248477
D0VWQ3	Ribosomal protein L18	37.766	7	7	188	21.6	11.69	1.079	1.014	0.897	0.996667	0.919	0.979	1.014	0.970667	1.069	1.005	1.026	1.03333	0.973913	0.687314	1.06456	0.134986	1.03679	0.551617
E2R9P2	Uncharacterized protein	37.7551	4	4	98	11.3	5.52	0.758	0.72	0.685	0.721	0.886	1.47	1.867	1.40767	0.853	0.882	0.88	0.871667	1.95238	0.0740642	0.619228	0.133228	1.20897	0.00283523
J9P530	Uncharacterized protein	37.6712	16	16	584	64	9.36	0.895	0.95	0.941	0.928667	1.031	1.08	1.032	1.04767	1.027	1.022	1.022	1.02367	1.12814	0.00714533	0.977092	0.213863	1.1023	0.00515339
F6XH46	Glutathione peroxidase	37.6623	5	5	154	17.3	5.57	1.048	1.04	0.749	0.945667	0.881	0.956	1.066	0.967667	1.142	1.04	1.078	1.08667	1.02326	0.853948	1.12298	0.124719	1.1491	0.241959
E2QWD3	Uncharacterized protein	37.6623	12	12	385	42	8.02	1.045	0.956	1.005	1.002	0.943	0.938	0.998	0.959667	1.037	1.047	1.031	1.03833	0.957751	0.257939	1.08197	0.0164393	1.03626	0.237129
E2RTJ7	Uncharacterized protein	37.6582	38	37	1264	140.3	7.77	0.995	1.034	0.963	0.997333	0.993	1.023	0.993	1.003	1.013	0.996	0.99	0.999667	1.00568	0.816233	0.996677	0.797284	1.00234	0.919378
E2R8Y3	Uncharacterized protein	37.6518	7	7	247	27.7	8.73	0.922	0.962	0.955	0.946333	1.031	1.099	1.013	1.04767	0.986	1.014	1.019	1.00633	1.10708	0.0248796	0.960547	0.21565	1.0634	0.0201445
P62872	Guanine nucleotide-binding protein G(I)/G(S)/G(T) subunit beta-1	37.6471	10	4	340	37.4	6	1.105	0.986	1.006	1.03233	1.061	0.919	0.998	0.992667	0.961	0.972	0.991	0.974667	0.961576	0.511725	0.981867	0.690324	0.944139	0.201987
E2RHX1	Uncharacterized protein	37.6316	12	12	380	43	9.55	0.978	0.922	0.923	0.941	0.989	0.99	0.98	0.986333	1.05	1.069	1.099	1.07267	1.04818	0.0731774	1.08753	0.00410907	1.13992	0.0048777
P06583	Sodium/potassium-transporting ATPase subunit beta-1	37.6238	11	11	303	35.2	8.65	1.109	1.135	1.14	1.128	0.948	0.904	0.975	0.942333	0.953	0.89	0.945	0.929333	0.835402	0.00124014	0.986204	0.673426	0.823877	0.000834472
E2RBJ1	Uncharacterized protein	37.6106	16	16	452	50.4	6.4	0.989	0.939	1.043	0.990333	0.98	0.953	1.002	0.978333	1.025	1.02	1.047	1.03067	0.987883	0.736085	1.05349	0.0332947	1.04073	0.265118
A0A1B1X461	ATP synthase subunit gamma	37.5839	11	8	298	33	9.14	0.994	0.943	1.047	0.994667	0.946	1.017	1.016	0.993	1.022	1.014	1	1.012	0.998324	0.967229	1.01913	0.479073	1.01743	0.602555
E2R0Y5	Uncharacterized protein	37.5723	9	9	346	36.1	9.13	1.019	0.956	1.029	1.00133	0.899	0.965	1.041	0.968333	1.023	1.043	1.026	1.03067	0.967044	0.520969	1.06437	0.207468	1.02929	0.283221
E2R057	Uncharacterized protein	37.5622	11	10	402	44.7	6.18	0.969	0.971	0.993	0.977667	1.07	1.067	1.017	1.05133	0.956	1	0.957	0.971	1.07535	0.0173605	0.923589	0.0233332	0.993181	0.70543
E2QX17	Proteasome subunit beta type	37.561	6	6	205	23	6.55	0.99	0.858	1.12	0.989333	1.023	0.84	1.026	0.963	1.025	1.051	1.066	1.04733	0.973383	0.800428	1.08757	0.249569	1.05863	0.490968
E2RF39	Uncharacterized protein	37.5	8	8	240	27.6	4.65	0.998	1.006	0.943	0.982333	1.041	1.082	1.039	1.054	0.96	0.979	0.952	0.963667	1.07296	0.0417876	0.914295	0.00500037	0.980998	0.431485
E2RLX7	Uncharacterized protein	37.5	7	1	216	24.1	7.39	0.958	1.028	0.994	0.993333	0.923	1.025	1.126	1.02467	0.986	0.994	0.965	0.981667	1.03154	0.639809	0.958035	0.50809	0.988255	0.623705
E2QSE3	Uncharacterized protein	37.4707	15	15	427	47.3	7.17	0.965	0.999	0.942	0.968667	1.004	0.992	1.021	1.00567	1.063	0.996	1.019	1.026	1.0382	0.117138	1.02022	0.39544	1.05919	0.0895168
E2R7R8	Structural maintenance of chromosomes protein	37.4475	42	42	1191	134.8	8.47	1.01	1.02	0.966	0.998667	0.995	1.019	1.016	1.01	0.993	0.99	0.989	0.990667	1.01135	0.567704	0.980858	0.064739	0.991989	0.655605
F1PZA1	Isocitrate dehydrogenase [NADP]	37.4396	16	15	414	46.8	6.55	1.051	1.055	1.028	1.04467	0.948	0.938	1.014	0.966667	1.03	0.967	0.968	0.988333	0.925335	0.036749	1.02241	0.531382	0.946075	0.0662638
E2RBA8	Uncharacterized protein	37.4161	17	17	596	64	8.28	1.048	0.957	1.056	1.02033	1.013	0.957	0.974	0.981333	0.965	1.019	1.012	0.998667	0.961777	0.337426	1.01766	0.505285	0.978765	0.57966
E2QWV5	Uncharacterized protein	37.415	14	14	441	49.3	9.44	1.081	1.031	1.056	1.056	1.034	0.961	0.994	0.996333	0.95	0.959	0.934	0.947667	0.943497	0.0799409	0.951154	0.0948651	0.897412	0.0025882
E2RHR7	Tyrosine--tRNA ligase	37.4113	22	21	564	63	8.7	0.98	0.971	0.987	0.979333	0.968	1.035	0.995	0.999333	1.015	1.022	1.026	1.021	1.02042	0.37402	1.02168	0.333709	1.04255	0.00178658
E2RPE5	Uncharacterized protein	37.3984	6	6	123	14.6	11.05	0.991	0.994	0.962	0.982333	0.886	0.993	0.981	0.953333	1.077	1.07	1.047	1.06467	0.970478	0.458068	1.11678	0.033611	1.08381	0.00380437
F1PBM5	Elongation factor Ts, mitochondrial	37.3832	9	9	321	35.1	7.91	0.96	0.931	0.966	0.952333	1.01	0.939	1.042	0.997	1.048	1.035	1.07	1.051	1.0469	0.238856	1.05416	0.167854	1.10361	0.00267691
E2RCN3	Uncharacterized protein	37.3684	12	12	380	44.6	5.25	0.959	0.984	1.095	1.01267	1.032	0.948	1.022	1.00067	0.973	1.006	0.981	0.986667	0.98815	0.820313	0.986009	0.646685	0.974325	0.577694
F1PNI3	Uncharacterized protein	37.3626	14	1	364	39.5	8.25	0.531	1.385	0.706	0.874	0.846	2.387	0.865	1.366	0.756	0.795	0.729	0.76	1.56293	0.439041	0.556369	0.301198	0.869565	0.684981
J9NT16	Uncharacterized protein	37.3333	8	3	225	25	5.24	0.958	0.971	0.984	0.971	0.986	1.061	1.013	1.02	1.003	1.022	1.002	1.009	1.05046	0.102047	0.989216	0.655746	1.03913	0.0186886
E2QZN3	Uncharacterized protein	37.3219	9	9	351	39	5.62	0.977	0.917	1.147	1.01367	1.004	0.928	0.971	0.967667	0.978	1.065	1.012	1.01833	0.95462	0.559251	1.05236	0.205396	1.0046	0.952346
E2RIU5	Uncharacterized protein	37.2973	6	6	185	21.1	7.17	1.007	0.97	1.007	0.994667	1.046	0.933	1.077	1.01867	0.999	0.972	0.989	0.986667	1.02413	0.625496	0.968586	0.511511	0.991957	0.613723
D0VWQ5	60S ribosomal protein L19	37.2449	8	8	196	23.5	11.47	0.96	0.994	1.003	0.985667	0.855	0.862	0.999	0.905333	1.134	1.057	1.136	1.109	0.918498	0.174179	1.22496	0.0191166	1.12513	0.0133077
F1PS82	Fructose-bisphosphate aldolase	37.2197	12	7	446	47.8	8.21	0.956	1.014	0.938	0.969333	1.018	0.97	1.044	1.01067	1.082	0.973	1.005	1.02	1.04264	0.260365	1.00923	0.822344	1.05227	0.270422
E2RR73	Uncharacterized protein	37.2093	12	4	215	21.8	10.93	0.909	0.841	1.018	0.922667	0.903	0.874	1.058	0.945	1.206	1.048	1.144	1.13267	1.02421	0.786037	1.19859	0.062651	1.2276	0.0383781
E2QUR8	Uncharacterized protein	37.1907	40	40	1253	145.2	8.5	1.011	1.013	0.996	1.00667	0.979	1.032	0.991	1.00067	0.999	0.982	0.996	0.992333	0.99404	0.74076	0.991672	0.647385	0.985762	0.128511
E2QRX1	Uncharacterized protein	37.1859	27	27	796	91.6	5.49	1.057	1.002	0.991	1.01667	0.965	1.002	0.98	0.982333	1.008	1.002	0.995	1.00167	0.96623	0.210914	1.01968	0.164634	0.985246	0.509905
E2R729	Uncharacterized protein	37.1636	28	1	966	108.8	6.18	0.959	0.998	0.969	0.975333	1.006	0.97	0.995	0.990333	1.034	1.027	1.042	1.03433	1.01538	0.396692	1.04443	0.0186742	1.06049	0.00910057
F1PAG5	Uncharacterized protein	37.1622	6	6	296	31	5.62	0.951	0.918	0.991	0.953333	1.025	0.996	0.98	1.00033	1.051	1.054	1.035	1.04667	1.0493	0.131863	1.04632	0.0325603	1.0979	0.0130632
E2QRQ8	Uncharacterized protein	37.1613	24	23	775	87.7	6.77	1.012	1.002	0.962	0.992	1.043	1.015	1.042	1.03333	1.009	0.942	0.973	0.974667	1.04167	0.0811469	0.943226	0.0519773	0.982527	0.520875
J9P048	Uncharacterized protein	37.1134	8	5	291	33.7	4.32	0.958	0.954	0.932	0.948	1.028	1.028	1.042	1.03267	1.045	1.004	1.009	1.01933	1.08931	0.000818576	0.987088	0.386533	1.07525	0.00943268
F1PUU1	Uncharacterized protein	37.092	11	11	337	38.8	9.57	1.11	0.981	1.143	1.078	0.866	0.87	0.924	0.886667	1.037	1.025	1.043	1.035	0.822511	0.0223466	1.16729	0.00158316	0.960111	0.435816
E2QXD1	Annexin	37.0902	16	16	488	52.5	5.68	0.993	1.003	1.043	1.013	0.947	1.011	0.959	0.972333	0.981	1.056	1.007	1.01467	0.959855	0.177517	1.04354	0.224379	1.00165	0.953348
J9P9G0	Uncharacterized protein	37.0833	19	17	720	80.3	8.47	0.952	0.979	0.997	0.976	0.982	0.933	1.023	0.979333	1.04	1.029	1.064	1.04433	1.00342	0.914372	1.06637	0.0809512	1.07001	0.014853
E2QYL0	Uncharacterized protein	37.0536	8	8	224	25.2	6.68	0.935	0.943	1.023	0.967	1.042	1.015	1.016	1.02433	1.014	0.996	1.016	1.00867	1.05929	0.123432	0.984705	0.223591	1.04309	0.221587
F1PGY4	Uncharacterized protein	37.013	12	12	308	34.4	6.34	0.972	1.005	1.005	0.994	0.987	1.177	0.95	1.038	0.944	0.999	0.962	0.968333	1.04427	0.569889	0.932884	0.388967	0.974178	0.259958
I7KJS3	HN1	37.013	3	3	154	16	5.59	0.898	1.113	0.99	1.00033	0.908	1.308	1.002	1.07267	0.956	0.88	0.945	0.927	1.07231	0.622666	0.864201	0.302073	0.926691	0.332924
E2RIW7	Uncharacterized protein	36.9748	4	4	119	13.3	11.56	0.969	1.001	0.953	0.974333	1.052	1.071	0.981	1.03467	0.97	1.013	0.99	0.991	1.06192	0.121796	0.957796	0.220148	1.01711	0.425422
E2RSX0	Uncharacterized protein	36.8889	6	6	225	25.5	5.63	0.924	1.041	1.018	0.994333	0.938	1.019	1.003	0.986667	1.051	0.983	1.023	1.019	0.99229	0.868732	1.03277	0.364957	1.02481	0.578677
E2RRQ3	Uncharacterized protein	36.8687	6	3	198	22.4	6.11	0.809	0.896	1.229	0.978	1.045	1.082	0.987	1.038	0.925	1.043	0.983	0.983667	1.06135	0.67058	0.947656	0.283265	1.00579	0.967923
Q8MJ44	cAMP-dependent protein kinase catalytic subunit alpha	36.8571	12	6	350	40.5	8.72	0.994	1.032	0.928	0.984667	0.98	1.045	1.028	1.01767	1.032	0.975	0.986	0.997667	1.03351	0.412151	0.980347	0.48693	1.0132	0.729457
J9NXG7	Glutathione peroxidase	36.8421	7	7	209	24	9.35	1.102	1.063	1.02	1.06167	0.92	0.98	1.017	0.972333	1	0.935	0.963	0.966	0.915856	0.0725442	0.993486	0.861124	0.90989	0.0341038
F1PUK2	Uncharacterized protein	36.8421	14	13	513	56.8	7.28	0.999	1.034	0.959	0.997333	0.969	1.03	0.996	0.998333	1.013	0.993	1.006	1.004	1.001	0.973168	1.00568	0.775762	1.00668	0.781235
F1PHP1	Uncharacterized protein	36.8421	9	8	323	36.3	5.39	0.997	1.011	0.947	0.985	1.045	0.987	1.002	1.01133	1.027	0.993	0.991	1.00367	1.02673	0.369523	0.992419	0.732835	1.01895	0.456474
E2RDK4	Uncharacterized protein	36.8116	9	9	345	38.5	5.22	0.948	0.993	0.925	0.955333	0.993	1.053	0.998	1.01467	1.006	1.048	1.036	1.03	1.06211	0.0990102	1.01511	0.540173	1.07816	0.0338559
F1PLJ9	Uncharacterized protein	36.767	36	36	1262	144.3	6.13	1.025	1.001	1.03	1.01867	1.013	0.976	0.988	0.992333	0.987	0.988	0.991	0.988667	0.974149	0.135262	0.996305	0.754869	0.97055	0.0293248
E2RRF8	Uncharacterized protein	36.7089	6	6	237	25.3	9.72	1.204	1.258	1.3	1.254	1.05	0.988	1.034	1.024	0.722	0.714	0.73	0.722	0.816587	0.00233775	0.705078	9.44311e-05	0.575758	4.62747e-05
E2RH57	Uncharacterized protein	36.7052	9	9	346	39.2	5.71	0.9	0.89	0.969	0.919667	1.077	1.091	1.073	1.08033	0.977	1.024	1	1.00033	1.1747	0.0032093	0.925949	0.0054339	1.08771	0.0463764
F1PEE3	Tight junction protein ZO-2	36.675	35	35	1197	134.5	6.77	1.042	1.069	1.009	1.04	0.998	0.989	0.983	0.99	0.987	0.948	0.975	0.97	0.951923	0.0490568	0.979798	0.180077	0.932692	0.028302
E2R635	Uncharacterized protein	36.658	24	24	772	87.9	9.22	0.992	1.006	0.992	0.996667	0.974	1.048	0.974	0.998667	0.973	1.026	1.016	1.005	1.00201	0.940328	1.00634	0.840737	1.00836	0.648068
E2RLF1	Uncharacterized protein	36.6412	14	14	524	57.9	5.06	1.14	0.977	1.239	1.11867	0.99	0.715	1.025	0.91	1.019	0.954	0.939	0.970667	0.813468	0.168419	1.06667	0.580622	0.8677	0.138841
Q9TV56	Protein S100-A4	36.6337	5	5	101	11.8	6.13	1.038	0.986	1.036	1.02	1.01	0.872	1.012	0.964667	1.065	0.996	0.986	1.01567	0.945752	0.325036	1.05287	0.386937	0.995752	0.892496
F1PJY9	Nucleolar GTP-binding protein 1	36.6269	18	18	587	68.3	9.41	0.942	0.953	0.965	0.953333	1	1.008	0.997	1.00167	0.983	1.079	1.071	1.04433	1.0507	0.00285097	1.0426	0.239832	1.09545	0.0444587
E2QYZ9	Uncharacterized protein	36.6013	4	4	153	17.2	8.22	1.042	1.013	0.96	1.005	0.822	0.964	0.973	0.919667	1.071	1.076	1.079	1.07533	0.915091	0.192317	1.16926	0.0335482	1.06998	0.0434182
E2QVP4	NADH dehydrogenase [ubiquinone] flavoprotein 2	36.5462	7	7	249	27.4	8.05	0.947	1.028	0.983	0.986	1.001	1.077	1.042	1.04	0.992	0.965	0.966	0.974333	1.05477	0.167961	0.936859	0.0501344	0.988168	0.665538
F1P9J9	Sideroflexin	36.5325	8	8	323	35.8	9.11	0.938	1.047	0.95	0.978333	0.976	1.071	1.028	1.025	1.024	0.964	1.001	0.996333	1.0477	0.349668	0.972033	0.428274	1.0184	0.665891
F1PI96	Uncharacterized protein	36.5269	10	10	334	38.7	6.98	0.962	1.022	1.004	0.996	1.021	1.046	1.013	1.02667	0.953	0.968	1.011	0.977333	1.03079	0.206587	0.951948	0.0693977	0.981258	0.494519
E2RM27	Uncharacterized protein	36.5169	5	5	178	19.7	10.14	1.036	1.102	1.088	1.07533	1.061	1.099	1.045	1.06833	0.896	0.824	0.849	0.856333	0.99349	0.798679	0.80156	0.0013226	0.796342	0.0016756
Q00004	Signal recognition particle subunit SRP68	36.4952	22	22	622	70.2	8.57	0.97	0.968	0.992	0.976667	1.013	0.978	1.003	0.998	1.026	1.022	1.027	1.025	1.02184	0.174569	1.02705	0.0622032	1.04949	0.00351213
J9NWI6	Uncharacterized protein	36.481	34	33	1239	136.9	5.39	1.022	1.057	1	1.02633	0.966	1.025	0.969	0.986667	1.009	0.963	0.99	0.987333	0.961351	0.192948	1.00068	0.97861	0.962001	0.141022
E2RKH8	Uncharacterized protein	36.4754	8	8	244	26.7	9.06	0.978	0.974	0.943	0.965	1.028	1.034	0.999	1.02033	0.995	1.029	1.021	1.015	1.05734	0.0232012	0.994773	0.738533	1.05181	0.0295505
E2R841	Uncharacterized protein	36.4444	6	6	225	26	5.78	0.977	0.956	0.946	0.959667	1.025	0.948	1.001	0.991333	1.013	1.098	1.036	1.049	1.033	0.266003	1.05817	0.165931	1.09309	0.0296151
F1PGX1	Uncharacterized protein	36.4286	31	31	1120	122.5	5.12	1.106	1.149	1.11	1.12167	0.948	0.959	0.949	0.952	0.955	0.893	0.931	0.926333	0.848737	0.00027788	0.973039	0.235251	0.825854	0.000997153
F1Q1X9	Succinate dehydrogenase [ubiquinone] flavoprotein subunit, mitochondrial	36.4266	18	18	722	79.1	8.15	1.112	1.108	1.033	1.08433	0.944	0.944	0.987	0.958333	0.998	0.923	0.952	0.957667	0.8838	0.0128196	0.999304	0.98086	0.883185	0.019832
F6UT62	Uncharacterized protein	36.4198	7	6	162	18.8	8.66	1.002	0.988	0.926	0.972	1.014	1.022	1.038	1.02467	1.072	0.95	0.988	1.00333	1.05418	0.0970063	0.97918	0.59249	1.03224	0.506073
F1PV58	Importin subunit alpha	36.4185	12	6	497	55	4.83	0.993	1.024	0.972	0.996333	0.947	1.053	1.068	1.02267	1	0.971	0.971	0.980667	1.02643	0.555343	0.958931	0.345279	0.984276	0.431612
E2QY54	Uncharacterized protein	36.4162	5	5	173	18.9	5.78	0.957	1.037	0.99	0.994667	0.993	1.111	0.945	1.01633	0.994	1.005	0.967	0.988667	1.02178	0.711306	0.972778	0.613575	0.993968	0.827593
E2QW25	Uncharacterized protein	36.4078	8	8	206	24	10.04	1.007	1.003	0.922	0.977333	1.042	1.107	0.973	1.04067	0.989	0.983	0.974	0.982	1.0648	0.253933	0.943626	0.20632	1.00477	0.875857
E2RGD3	Uncharacterized protein	36.3897	10	9	349	39.4	6.8	0.938	1.031	0.943	0.970667	1.029	1.085	1.022	1.04533	1.026	0.975	0.953	0.984667	1.07692	0.108046	0.941964	0.108101	1.01442	0.725371
J9PAH6	Uncharacterized protein	36.3229	5	5	223	23.9	8.38	1.1	1.064	1.007	1.057	1.067	1.064	0.877	1.00267	0.879	0.992	0.95	0.940333	0.948597	0.471602	0.937832	0.429349	0.889625	0.052207
E2RSP4	Lysine--tRNA ligase	36.32	21	21	625	71.5	6.89	1.01	0.926	1.061	0.999	1.019	0.899	1.005	0.974333	0.987	1.066	1.027	1.02667	0.975309	0.674995	1.05371	0.302129	1.02769	0.575882
E2RHZ1	Uncharacterized protein	36.3171	11	10	391	45.1	7.74	0.986	1	0.995	0.993667	0.978	1.033	0.966	0.992333	0.995	1.026	1.022	1.01433	0.998658	0.952487	1.02217	0.389388	1.0208	0.122015
E2RKE5	Uncharacterized protein	36.3158	7	7	190	21.8	8.82	0.92	1.014	0.925	0.953	1.011	1.047	1.041	1.033	1.009	1.011	1.022	1.014	1.08395	0.0695835	0.981607	0.184005	1.06401	0.118735
J9P746	Uncharacterized protein	36.2963	20	20	540	58.2	7.87	0.927	0.977	0.934	0.946	0.986	1.023	1.035	1.01467	1.076	1.017	1.026	1.03967	1.07259	0.0330445	1.02464	0.348127	1.09901	0.0177571
Q6YKA4	High mobility group protein B1	36.2791	11	10	215	24.9	5.74	0.994	0.938	1.025	0.985667	0.938	0.981	0.994	0.971	1.026	1.069	1.035	1.04333	0.98512	0.65643	1.07449	0.0277666	1.05851	0.11423
J9P1R5	Uncharacterized protein	36.2637	11	11	364	39.5	6.61	1.031	0.993	1.011	1.01167	1.027	0.984	1.08	1.03033	0.986	0.951	0.938	0.958333	1.01845	0.56569	0.93012	0.0825385	0.947282	0.0417877
E2RJ29	Uncharacterized protein	36.2637	12	12	364	40.7	8.88	0.976	0.967	0.987	0.976667	1.017	1.015	1.007	1.013	0.978	1.054	0.999	1.01033	1.0372	0.00513951	0.997368	0.912775	1.03447	0.223385
E2RN00	Uncharacterized protein	36.2403	18	18	516	58.2	8.7	1.037	0.996	1.002	1.01167	0.956	0.991	1.007	0.984667	1.003	1.01	0.997	1.00333	0.973311	0.243467	1.01896	0.295413	0.991763	0.565624
J9P5U3	Galectin	36.2245	6	6	196	21.2	5.91	0.976	1.055	0.921	0.984	1.019	1.101	1.016	1.04533	0.988	0.957	0.966	0.970333	1.06233	0.269008	0.928253	0.0628276	0.986111	0.749581
E2RDU5	Uncharacterized protein	36.2069	4	4	116	13.4	6.13	0.953	1.013	0.941	0.969	1.073	1.058	1.033	1.05467	0.965	0.989	0.975	0.976333	1.08841	0.0270937	0.925727	0.00448946	1.00757	0.769014
F1PTW4	Uncharacterized protein	36.1798	13	6	445	49.5	5.71	1.008	1.007	1	1.005	1.049	0.996	0.964	1.003	1.012	0.979	0.985	0.992	0.99801	0.939872	0.989033	0.702336	0.987065	0.28166
J9P3Z7	Uncharacterized protein	36.087	7	7	230	25.6	5.87	0.865	0.915	0.973	0.917667	1.052	0.993	1.059	1.03467	1.047	1.037	1.059	1.04767	1.1275	0.0357415	1.01256	0.584318	1.14166	0.0150732
F6UV28	Uncharacterized protein	36.0602	71	70	2127	239.4	4.96	0.998	1.032	1.009	1.013	0.996	1.02	0.982	0.999333	0.985	0.984	0.994	0.987667	0.986509	0.412298	0.988326	0.369296	0.974992	0.0735091
E2QSZ0	Uncharacterized protein	36.0341	15	15	469	51.8	6.9	0.969	0.983	0.952	0.968	0.987	1.003	1.035	1.00833	1.033	1.023	1.015	1.02367	1.04167	0.0733343	1.01521	0.365629	1.05751	0.00580593
F1PUR5	Uncharacterized protein	36	4	4	175	19.9	8.78	0.874	0.829	1.049	0.917333	1.002	0.805	1.027	0.944667	1.116	1.137	1.161	1.138	1.0298	0.792325	1.20466	0.0536594	1.24055	0.0320222
F1PA19	Uncharacterized protein	35.9848	10	8	264	29.7	9.33	0.94	0.984	1.038	0.987333	1.032	0.991	0.976	0.999667	1.035	0.937	1.066	1.01267	1.01249	0.72688	1.013	0.774067	1.02566	0.626338
J9NZ41	Uncharacterized protein	35.9684	17	16	506	59.8	6.57	0.943	1.031	0.997	0.990333	1.019	1	1.019	1.01267	1.007	0.968	1.017	0.997333	1.02255	0.445092	0.984858	0.398396	1.00707	0.825035
E2RSR1	Uncharacterized protein	35.9431	18	18	562	62.7	8.28	1.085	1.095	1.025	1.06833	0.909	0.979	0.986	0.958	0.965	0.986	0.969	0.973333	0.896724	0.0284613	1.01601	0.578796	0.911076	0.0140409
F1PSC7	Mitochondrial import inner membrane translocase subunit TIM44	35.9031	15	14	454	51.5	7.68	0.959	0.957	0.976	0.964	1.014	1.045	1.005	1.02133	1.014	1.015	1.016	1.015	1.05947	0.0132963	0.993799	0.629137	1.0529	0.00108808
F1PB61	Uncharacterized protein	35.9019	8	6	571	59.4	8.02	1.014	1.114	1.047	1.05833	0.892	0.977	0.969	0.946	1.011	0.962	1.015	0.996	0.893858	0.0483894	1.05285	0.19332	0.941102	0.140653
E2R5A5	Uncharacterized protein	35.8974	6	4	195	21.5	7.44	0.944	0.98	0.929	0.951	1.029	1.092	1.03	1.05033	1.018	0.985	0.993	0.998667	1.10445	0.0181865	0.950809	0.0888025	1.05012	0.0580132
F1P6W6	Uncharacterized protein	35.867	13	13	421	46.7	8.1	0.987	0.996	0.956	0.979667	1.015	0.998	1.012	1.00833	1.034	0.986	1.016	1.012	1.02926	0.0956143	1.00364	0.8183	1.033	0.155669
E2RAF6	Acyl-coenzyme A oxidase	35.8548	13	13	661	74.7	7.74	0.9	1.023	0.983	0.968667	1.012	1.05	0.981	1.01433	1.035	1.005	1.011	1.017	1.04714	0.331436	1.00263	0.909192	1.0499	0.26546
E2RL81	Uncharacterized protein	35.8407	31	31	1130	124.4	6.61	1.037	1.013	1.002	1.01733	0.979	0.942	0.951	0.957333	1.033	1.026	1.018	1.02567	0.941022	0.0168369	1.07138	0.0046327	1.00819	0.498366
F6Y6B4	Uncharacterized protein	35.8209	2	2	67	7.7	6.61	0.95	0.949	0.987	0.962	1.052	0.833	1.091	0.992	1.105	1.004	1.029	1.046	1.03119	0.730705	1.05444	0.563458	1.08732	0.0627963
E2R5M5	Uncharacterized protein	35.814	6	5	215	23.4	4.56	1.005	0.987	0.95	0.980667	0.986	1.031	1.018	1.01167	1.015	1.022	0.985	1.00733	1.03161	0.213889	0.995717	0.817	1.02719	0.248708
F1PCM1	Biliverdin reductase A	35.8108	10	9	296	33.7	6.37	0.96	1.045	0.95	0.985	1.132	1.066	0.972	1.05667	0.985	0.94	0.95	0.958333	1.07276	0.265064	0.90694	0.111924	0.972927	0.465395
F1PWM2	Uncharacterized protein	35.8025	7	0	162	18.7	10.49	0.945	0.94	0.967	0.950667	0.853	1	0.877	0.91	1.13	1.079	1.21	1.13967	0.957223	0.42917	1.25238	0.0180319	1.19881	0.00837449
E2RA30	Uncharacterized protein	35.7771	10	10	341	38.8	6.15	0.938	0.94	0.899	0.925667	1.135	1.036	1.022	1.06433	0.992	1.031	1.006	1.00967	1.1498	0.0217613	0.948638	0.217117	1.09075	0.00874592
A4GT58	Cdc42 GTPase-activating protein	35.7631	14	14	439	50.6	6.54	1.018	1.045	0.987	1.01667	0.965	1.009	1.001	0.991667	0.999	0.998	0.977	0.991333	0.97541	0.310303	0.999664	0.983678	0.975082	0.236917
F1PKF6	Uncharacterized protein	35.7362	36	36	1304	145.7	7.09	1.036	0.988	1.018	1.014	1.014	0.949	0.972	0.978333	1.022	0.983	1.018	1.00767	0.964826	0.20562	1.02998	0.265985	0.993754	0.751799
F1P6V8	Uncharacterized protein	35.7143	12	11	462	51.2	6.49	1.03	1.063	0.991	1.028	0.964	0.939	0.977	0.96	1.054	0.934	1.049	1.01233	0.933852	0.0449954	1.05451	0.268375	0.98476	0.741868
E2QUA5	Uncharacterized protein	35.7143	6	6	210	23.8	6.25	0.998	0.864	1.004	0.955333	1.022	0.945	1.033	1	0.999	1.064	1.07	1.04433	1.04676	0.450195	1.04433	0.283529	1.09316	0.156164
J9P7B2	Uncharacterized protein	35.7143	1	1	70	7.9	5.31	0.946	1.056	0.893	0.965	0.954	1.115	1.151	1.07333	0.977	0.986	0.921	0.961333	1.11226	0.233603	0.895652	0.154457	0.9962	0.947304
J9P6J9	Uncharacterized protein	35.6383	6	6	188	21.3	8.79	1.048	0.946	0.957	0.983667	0.958	0.973	1.027	0.986	1.02	1.039	1.031	1.03	1.00237	0.954604	1.04462	0.112084	1.0471	0.230508
F1PSC4	ELAV-like protein	35.6287	10	10	334	37.1	9.26	0.913	1.001	0.999	0.971	1.004	1.07	1.008	1.02733	1.007	0.992	1.007	1.002	1.05802	0.192921	0.975341	0.312549	1.03193	0.351656
F1PFC6	Uncharacterized protein	35.5932	5	4	177	19.2	9.74	0.996	0.999	0.917	0.970667	0.947	1.05	1.015	1.004	1.034	1.009	1.033	1.02533	1.03434	0.456064	1.02125	0.533207	1.05632	0.123244
E2QWX5	Uncharacterized protein	35.5556	6	6	180	20.3	4.96	1.061	1.103	1.017	1.06033	1.056	1.128	0.975	1.053	0.872	0.911	0.875	0.886	0.993084	0.891967	0.841406	0.0220504	0.835586	0.00330504
F1PEX8	Uncharacterized protein	35.5164	14	14	397	44.2	9.17	0.944	0.97	0.997	0.970333	0.966	1.008	1.046	1.00667	1.044	1.009	1.016	1.023	1.03744	0.260005	1.01623	0.556064	1.05428	0.0477588
F1PU34	Uncharacterized protein	35.4994	24	24	831	94.6	6.79	0.968	0.976	0.98	0.974667	1.05	0.99	1.01	1.01667	1.009	0.994	1.025	1.00933	1.04309	0.0798195	0.992787	0.729618	1.03557	0.0226897
E2R9I0	Polyadenylate-binding protein	35.4992	20	1	631	69.4	9.52	0.962	1.038	0.966	0.988667	0.963	1.022	0.977	0.987333	1.035	1.019	1.017	1.02367	0.998651	0.967161	1.0368	0.12377	1.0354	0.239389
E2RMG3	NADH dehydrogenase [ubiquinone] 1 beta subcomplex subunit 8, mitochondrial	35.4839	5	5	186	21.8	7.05	0.94	0.899	0.977	0.938667	0.995	1.023	1.102	1.04	1.015	1.032	1.017	1.02133	1.10795	0.0608476	0.982051	0.59629	1.08807	0.0233775
E2RBF4	Uncharacterized protein	35.4749	12	12	358	40.1	6.44	1.027	0.94	0.965	0.977333	0.945	1.012	0.989	0.982	1.02	1.051	1.052	1.041	1.00477	0.89271	1.06008	0.0571368	1.06514	0.0846994
E2RQL3	Uncharacterized protein	35.4749	11	11	358	40.5	4.5	0.947	0.93	0.919	0.932	1.076	1.004	1.027	1.03567	1.044	1.022	1.031	1.03233	1.11123	0.0103485	0.996781	0.887768	1.10765	0.000633643
J9NWL1	SUMO-conjugating enzyme	35.461	5	5	141	15.7	9.69	0.963	0.986	0.971	0.973333	1.043	1.085	1.002	1.04333	1.007	0.958	0.983	0.982667	1.07192	0.0482052	0.941853	0.0947122	1.00959	0.5835
J9P396	Vesicular integral-membrane protein VIP36	35.4167	10	10	384	43	7.21	1.002	1.069	0.97	1.01367	0.967	1.029	0.95	0.982	1.05	0.956	1.007	1.00433	0.96876	0.449059	1.02274	0.571219	0.990793	0.826367
E2RQP6	Eukaryotic translation initiation factor 3 subunit C	35.3779	30	30	913	105.4	5.72	1.042	0.988	1.009	1.013	0.99	0.952	0.964	0.968667	1.009	1.022	1.025	1.01867	0.956236	0.0832887	1.05162	0.015049	1.00559	0.748061
E2QY31	Platelet-activating factor acetylhydrolase IB subunit alpha	35.3659	13	12	410	46.6	7.37	1.075	1.033	1.045	1.051	0.917	0.839	0.924	0.893333	1.053	1.039	1.075	1.05567	0.849984	0.00624991	1.18172	0.0051173	1.00444	0.788899
E2QZ61	Uncharacterized protein	35.3638	19	19	591	66.6	9.23	0.984	0.942	0.957	0.961	0.976	1.052	0.995	1.00767	0.999	1.039	1.057	1.03167	1.04856	0.146305	1.02382	0.4479	1.07353	0.0285487
E2R2U4	Uncharacterized protein	35.3293	5	5	167	18	9.38	1.122	1.164	0.888	1.058	1.032	0.956	1.082	1.02333	0.89	0.955	0.912	0.919	0.967234	0.729195	0.898046	0.0649461	0.86862	0.189184
E2RGZ5	Uncharacterized protein	35.3234	7	7	201	22.7	5.17	0.992	0.847	1.147	0.995333	0.967	0.922	1.026	0.971667	0.995	1.044	1.06	1.033	0.976222	0.809081	1.06312	0.162774	1.03784	0.693251
E2RLB3	Peptidylprolyl isomerase	35.307	15	14	456	51	6.02	1.001	1.047	0.951	0.999667	1.001	1.009	0.995	1.00167	1.056	0.958	0.982	0.998667	1.002	0.946516	0.997005	0.924579	0.999	0.981472
E2RL92	Uncharacterized protein	35.3009	30	30	864	96.4	6.2	1.013	1.032	1.012	1.019	0.961	1.019	1.019	0.999667	0.984	0.969	0.991	0.981333	0.981027	0.396915	0.981661	0.419486	0.963036	0.0148659
F6XD36	Uncharacterized protein	35.2697	10	8	241	27.7	8.56	0.956	0.951	0.939	0.948667	0.968	1.035	0.984	0.995667	1.05	1.024	1.093	1.05567	1.04954	0.0869467	1.06026	0.103136	1.11279	0.0067042
F1PFD0	Sorting nexin	35.2657	16	14	414	47.3	6.29	1.025	1.016	0.995	1.012	0.921	0.998	1.002	0.973667	1.056	0.993	0.996	1.015	0.962121	0.240251	1.04245	0.283612	1.00296	0.899753
F6Y3P9	Uncharacterized protein	35.249	26	26	783	85.2	6.51	1.045	1.059	0.986	1.03	0.951	0.898	0.992	0.947	1.093	0.948	1.029	1.02333	0.919417	0.0779679	1.08061	0.201583	0.993528	0.895263
E2QXA3	Uncharacterized protein	35.2256	21	21	687	74	8.18	1.029	0.986	0.996	1.00367	0.956	0.955	1.031	0.980667	1.013	0.981	1.053	1.01567	0.977084	0.462326	1.03569	0.344341	1.01196	0.650535
E2RAD3	Uncharacterized protein	35.2113	4	4	142	15.9	9.61	0.934	1.052	0.901	0.962333	0.877	1.159	1.009	1.015	1.018	1.015	1.035	1.02267	1.05473	0.603212	1.00755	0.929749	1.06269	0.262102
F1Q0F8	Uncharacterized protein	35.1981	11	11	429	47.5	5.72	1.046	0.953	1.075	1.02467	1.082	0.904	1.056	1.014	0.974	0.949	0.962	0.961667	0.98959	0.880516	0.948389	0.402765	0.938517	0.168252
E2RN95	Uncharacterized protein	35.1955	5	5	179	19.6	7.37	1.177	1.165	1.132	1.158	0.974	1.141	0.837	0.984	0.765	0.941	0.868	0.858	0.849741	0.122009	0.871951	0.282896	0.740933	0.00473482
E2R9N5	Uncharacterized protein	35.1955	15	14	537	59.1	5.81	1.032	1.003	0.985	1.00667	0.949	1.017	1.024	0.996667	1.029	0.992	0.969	0.996667	0.990066	0.735082	1	1	0.990066	0.675737
E2R771	Uncharacterized protein	35.1852	4	4	162	17.7	8.34	0.905	0.94	1.035	0.96	1.072	1.066	1.109	1.08233	0.932	0.984	0.957	0.957667	1.12743	0.0408775	0.884817	0.00347178	0.997569	0.957999
E2RI34	Uncharacterized protein	35.1351	6	6	148	16.6	11.12	1.031	0.989	0.98	1	0.866	1.026	0.965	0.952333	1.068	1.035	1.04	1.04767	0.952333	0.387473	1.10011	0.116512	1.04767	0.0640462
F1PLM5	S-(hydroxymethyl)glutathione dehydrogenase	35.1064	10	10	376	39.9	7.5	1.102	0.951	1.041	1.03133	1.02	0.823	1.041	0.961333	1.017	1.001	1.004	1.00733	0.932127	0.442033	1.04785	0.544818	0.976729	0.615448
Q3BCR5	Thiopurine S-methyltransferase	35.102	8	8	245	28.4	6.73	0.995	1.022	0.958	0.991667	1.007	1.029	1.021	1.019	1	1.003	0.964	0.989	1.02756	0.23626	0.970559	0.100184	0.997311	0.91092
E2R7S5	Uncharacterized protein	35.102	17	17	490	54.9	10.04	0.927	0.957	0.905	0.929667	1.07	1.04	1.049	1.053	1	1.042	1.012	1.018	1.13266	0.00213529	0.966762	0.0844927	1.09502	0.0107157
E2QXY7	Uncharacterized protein	35.0877	12	11	399	45.4	6.74	1.037	0.956	1.065	1.01933	1.019	0.951	0.995	0.988333	0.979	1.015	0.983	0.992333	0.969588	0.463352	1.00405	0.870043	0.973512	0.478909
F1PTL1	Uncharacterized protein	35.0829	10	8	362	39.6	4.58	1.07	0.997	0.953	1.00667	0.882	1.025	1.025	0.977333	1.018	1.012	1.018	1.016	0.970861	0.64307	1.03956	0.46313	1.00927	0.798309
F1PY01	Uncharacterized protein	35.0663	30	29	981	109	6.34	1.031	1.034	0.966	1.01033	0.995	0.975	0.986	0.985333	1.051	0.982	0.981	1.00467	0.975256	0.336777	1.01962	0.463566	0.994391	0.868358
J9NZJ6	Uncharacterized protein	35.0629	17	16	636	68.9	8.53	1.087	1.026	1.062	1.05833	0.924	0.94	0.965	0.943	1.019	0.983	0.992	0.998	0.891024	0.00568352	1.05832	0.0268951	0.942992	0.0437644
F1PKN7	Uncharacterized protein	35.0272	12	12	551	59.1	5.8	0.924	1.017	0.97	0.970333	1.016	1.083	0.993	1.03067	1.01	0.983	1.003	0.998667	1.06218	0.188218	0.968952	0.319596	1.0292	0.369428
E2RLB6	NADH dehydrogenase [ubiquinone] 1 subunit C2	35	4	4	120	14	8.82	0.91	0.895	1.013	0.939333	1.093	1.041	1.022	1.052	1.013	0.988	1.026	1.009	1.11994	0.0577755	0.959125	0.147307	1.07417	0.146422
E2RJH5	Uncharacterized protein	34.9666	12	4	449	49.2	6.3	0.925	0.98	1.116	1.007	0.97	0.985	0.986	0.980333	1.017	1.023	0.998	1.01267	0.973519	0.664259	1.03298	0.0240734	1.00563	0.925933
E2QWM9	Ubiquitin carboxyl-terminal hydrolase	34.9544	9	9	329	37.6	5.33	0.979	0.957	0.993	0.976333	0.995	1.005	0.998	0.999333	1.04	1.018	1.013	1.02367	1.02356	0.102219	1.02435	0.0506887	1.04848	0.0239647
E2R4C5	Uncharacterized protein	34.9515	3	3	103	11.4	9.7	0.929	0.98	0.938	0.949	0.928	1.056	1.017	1.00033	1.074	0.996	1.081	1.05033	1.05409	0.278867	1.04998	0.344232	1.10678	0.0322183
J9NYE0	Uncharacterized protein	34.9282	5	5	209	23.2	5.38	0.91	1.022	0.967	0.966333	1.018	1.081	0.998	1.03233	1.002	0.993	1.01	1.00167	1.0683	0.181694	0.970294	0.295221	1.03656	0.340756
E2RFV7	Uncharacterized protein	34.9206	14	12	378	39.6	9.01	1.074	0.941	0.987	1.00067	1.124	0.993	0.996	1.03767	0.955	0.973	0.958	0.962	1.03698	0.55937	0.92708	0.157178	0.961359	0.381886
Q28288	Syntaxin-binding protein 2	34.9073	16	16	593	66.5	6.84	1.122	1.113	1.105	1.11333	0.897	0.921	0.988	0.935333	0.965	0.942	0.946	0.951	0.84012	0.00300273	1.01675	0.607365	0.854192	4.69948e-05
X5IHJ5	4F2 cell-surface antigen heavy chain	34.8968	15	1	533	58.4	5.64	0.993	1.124	0.93	1.01567	0.965	1.096	0.929	0.996667	0.857	1.044	1.062	0.987667	0.981293	0.815886	0.99097	0.918763	0.972432	0.76356
F1PRC5	Uncharacterized protein	34.8968	15	1	533	58.5	5.64	0.963	1.016	0.986	0.988333	1.055	1.095	0.969	1.03967	0.907	0.991	1.018	0.972	1.05194	0.270859	0.934915	0.247278	0.983474	0.679914
E2RMB9	N-Myc downstream regulated gene 1	34.8958	9	9	384	41.7	5.71	0.911	0.84	1.134	0.961667	1.005	0.922	0.997	0.974667	1.001	1.105	1.085	1.06367	1.01352	0.894949	1.09131	0.0980033	1.10607	0.339475
E2R4T5	Uncharacterized protein	34.8806	22	22	754	81.5	8.02	1.002	1.012	0.944	0.986	0.92	0.999	1.011	0.976667	1.068	1.02	1.025	1.03767	0.990534	0.805895	1.06246	0.132468	1.0524	0.118907
E2RQ65	Uncharacterized protein	34.8571	8	8	350	38	9.17	1.066	1.049	1.011	1.042	1.011	1.031	0.959	1.00033	0.903	0.979	0.991	0.957667	0.960013	0.196608	0.957348	0.288874	0.919066	0.0578139
E2RKS8	Uncharacterized protein	34.8315	8	8	356	38.5	7.39	0.955	1.019	0.961	0.978333	1.006	1.017	1.007	1.01	1.012	0.991	1.032	1.01167	1.03237	0.20093	1.00165	0.899142	1.03407	0.230546
E2RNC4	Uncharacterized protein	34.7826	8	8	299	32.6	4.34	1.019	1.064	0.926	1.003	0.998	1.136	1.021	1.05167	0.975	0.927	0.934	0.945333	1.04852	0.455326	0.898891	0.0784573	0.942506	0.253773
E2QZ13	Uncharacterized protein	34.72	16	14	625	71	6.86	0.992	1.047	1.025	1.02133	0.984	0.93	1.024	0.979333	1.034	0.97	0.995	0.999667	0.958877	0.254286	1.02076	0.571049	0.978786	0.427156
J9P8G4	Uncharacterized protein	34.715	4	4	193	20.4	6.77	1.022	0.984	1.084	1.03	0.945	0.997	1.025	0.989	0.966	1.005	0.973	0.981333	0.960194	0.334522	0.992248	0.785418	0.952751	0.197457
J9P2I9	Uncharacterized protein	34.7092	15	15	533	57.7	8.37	0.99	0.987	0.976	0.984333	1.006	0.96	1.024	0.996667	1.046	1.003	1.01	1.01967	1.01253	0.561901	1.02308	0.378539	1.0359	0.0648938
F1PVE5	Uncharacterized protein	34.6847	16	13	444	49.2	7.15	1.031	1.034	1.02	1.02833	0.981	1.01	0.99	0.993667	0.981	0.98	0.974	0.978333	0.966288	0.0222976	0.984569	0.157999	0.951378	0.00047366
E2R832	Phosphomannomutase	34.6614	9	9	251	28.4	5.99	1.041	0.97	0.953	0.988	1.002	0.965	1.01	0.992333	1.054	1.003	1.002	1.01967	1.00439	0.893214	1.02754	0.283169	1.03205	0.37779
F1PZL7	Uncharacterized protein	34.6558	21	14	857	97.3	5	1.006	1.035	1.013	1.018	0.974	1.017	0.985	0.992	0.992	0.975	1.004	0.990333	0.97446	0.170432	0.99832	0.91902	0.972823	0.0846888
E2RSK6	Uncharacterized protein	34.6535	14	14	404	46.2	6.71	1.036	0.98	1.039	1.01833	0.965	0.946	1.007	0.972667	1.027	1.003	0.997	1.009	0.955155	0.157781	1.03735	0.14674	0.990835	0.683367
E2RFV4	Uncharacterized protein	34.6486	27	26	811	89.1	8.07	1.009	0.997	1.003	1.003	1.007	0.97	1.013	0.996667	1.015	0.984	1.003	1.00067	0.993686	0.671953	1.00401	0.817056	0.997674	0.82113
F1PUU2	Uncharacterized protein	34.633	10	10	436	48	8.12	0.955	0.946	0.957	0.952667	0.94	0.992	1.005	0.979	1.017	1.121	1.067	1.06833	1.02764	0.261205	1.09125	0.0681107	1.12141	0.0186573
E2RE67	Uncharacterized protein	34.6154	4	4	78	8.6	8.57	0.974	1.008	1.051	1.011	1.03	0.857	1.061	0.982667	1.087	1.005	0.928	1.00667	0.971975	0.695239	1.02442	0.774589	0.995714	0.936404
E2RM11	Uncharacterized protein	34.6062	12	12	419	50.1	5.1	0.894	0.904	0.885	0.894333	1.213	1.135	1.148	1.16533	0.971	0.913	0.937	0.940333	1.30302	0.000394761	0.806922	0.00156944	1.05143	0.0601018
E2R3F9	Uncharacterized protein	34.6017	21	21	841	95.6	7.23	0.984	1.051	0.969	1.00133	0.952	1.042	1.013	1.00233	1.012	0.998	0.981	0.997	1.001	0.979506	0.994679	0.858193	0.995672	0.879182
E2QT97	Uncharacterized protein	34.5946	6	5	185	21.4	4.93	0.902	0.955	0.957	0.938	1.101	1.028	1.066	1.065	1.025	0.977	0.989	0.997	1.13539	0.0101778	0.93615	0.0562492	1.0629	0.0628259
F1P9Y3	Uncharacterized protein	34.5865	9	9	266	30.5	7.49	0.954	0.957	0.944	0.951667	1.022	1.057	0.985	1.02133	1.061	1.019	1.001	1.027	1.0732	0.0301284	1.00555	0.84599	1.07916	0.0144009
F1PTE2	Uncharacterized protein	34.5483	20	20	631	70.4	8.16	1.042	1.101	0.971	1.038	0.937	1.012	0.972	0.973667	1.064	0.933	0.968	0.988333	0.938022	0.212212	1.01506	0.759559	0.952152	0.411917
F1P818	Uncharacterized protein	34.5342	19	19	805	90.6	5.72	0.977	0.979	1.023	0.993	0.961	1.005	0.977	0.981	1.044	1.009	1.025	1.026	0.987915	0.576544	1.04587	0.0513468	1.03323	0.142372
H9GW79	1,2-dihydroxy-3-keto-5-methylthiopentene dioxygenase	34.5324	4	4	139	16.8	5.85	1.007	1.064	1.006	1.02567	0.901	1.147	1.004	1.01733	1.011	0.942	0.917	0.956667	0.991875	0.915601	0.940367	0.473036	0.932727	0.112462
F1PUU4	Uncharacterized protein	34.4855	35	35	1273	145.1	6.02	1.026	1.067	0.995	1.02933	0.952	0.995	0.98	0.975667	1.004	0.99	0.992	0.995333	0.947863	0.0923645	1.02016	0.214354	0.966969	0.185745
E2QUE7	Uncharacterized protein	34.4828	8	8	145	17.2	10.55	0.943	0.962	0.954	0.953	0.946	1.003	0.984	0.977667	1.059	1.081	1.07	1.07	1.02588	0.234525	1.09444	0.0067321	1.12277	0.000154538
F1Q466	Uncharacterized protein	34.4828	8	8	406	41.9	7.64	0.856	1.044	0.939	0.946333	0.878	1.005	1.053	0.978667	1.06	1.118	1.048	1.07533	1.03417	0.690113	1.09877	0.162282	1.13632	0.092245
E2QY43	Uncharacterized protein	34.4729	15	15	351	39.6	9.66	1.05	0.987	1.01	1.01567	0.966	0.934	0.972	0.957333	1.026	1.028	1.026	1.02667	0.942566	0.0558982	1.07242	0.00420895	1.01083	0.58251
E2QV12	Uncharacterized protein	34.4715	22	21	615	68.4	7.05	1.024	1.031	0.928	0.994333	0.987	1.016	1.019	1.00733	1.016	0.996	0.984	0.998667	1.01307	0.727386	0.991396	0.564827	1.00436	0.906144
E2RFF7	Tyrosine-protein kinase	34.4444	13	13	450	50.6	7.05	0.993	0.989	1	0.994	1.028	0.976	1.001	1.00167	1.001	1.008	1.005	1.00467	1.00771	0.643786	1.003	0.852696	1.01073	0.0484852
E2RBC1	Uncharacterized protein	34.4086	7	7	186	21.1	5.48	1.054	1.061	1.003	1.03933	1.031	0.986	0.978	0.998333	0.975	0.945	0.968	0.962667	0.960552	0.171202	0.964274	0.130982	0.926235	0.0198111
E2R8M0	Uncharacterized protein	34.4037	14	14	436	50	7.84	0.99	1.001	0.967	0.986	0.978	0.996	1.02	0.998	1.008	1.014	1.027	1.01633	1.01217	0.488787	1.01837	0.242953	1.03076	0.0574359
E2RRA3	Uncharacterized protein	34.4	4	4	125	14.6	9.38	0.909	1.102	0.929	0.98	0.967	1.364	0.917	1.08267	0.962	0.927	0.924	0.937667	1.10476	0.541743	0.866071	0.364716	0.956803	0.535191
E2RK20	Uncharacterized protein	34.3891	8	8	221	25.6	8.65	0.936	0.957	0.979	0.957333	1.09	0.977	1.084	1.05033	0.998	0.972	1.006	0.992	1.09714	0.0743559	0.944462	0.200654	1.03621	0.0977361
E2RHI0	Uncharacterized protein	34.3811	13	13	509	55	5.38	1.001	0.971	1.024	0.998667	0.998	0.969	1.034	1.00033	1.012	0.994	0.996	1.00067	1.00167	0.94854	1.00033	0.987274	1.002	0.908638
E2R4S5	Malic enzyme	34.2466	16	16	584	65.3	7.46	0.838	0.906	0.966	0.903333	1.081	1.049	1.056	1.062	1.035	1.044	1.026	1.035	1.17565	0.0142552	0.974576	0.0703565	1.14576	0.0243101
F1P890	Uncharacterized protein	34.2105	3	3	76	8.5	6.06	1.055	0.883	1.064	1.00067	1.098	0.894	1.038	1.01	0.987	1.012	0.97	0.989667	1.00933	0.917323	0.979868	0.758452	0.989007	0.863769
J9P061	Uncharacterized protein	34.2105	3	3	76	8.5	8.88	0.845	0.886	0.932	0.887667	1.199	1.204	1.081	1.16133	0.922	0.976	0.957	0.951667	1.3083	0.00446889	0.81946	0.00831359	1.0721	0.0973752
E2QWS2	Uncharacterized protein	34.1772	6	6	237	26.7	6.6	0.893	0.908	0.945	0.915333	0.995	1.493	0.986	1.158	0.884	0.978	0.918	0.926667	1.26511	0.222639	0.80023	0.244648	1.01238	0.737402
E2RPC6	Proteasome subunit beta type	34.1549	8	8	284	30.9	8.38	0.994	1.004	1.059	1.019	0.985	1.102	0.991	1.026	0.946	0.96	0.958	0.954667	1.00687	0.878782	0.930474	0.13593	0.936866	0.0358133
J9NYF3	Uncharacterized protein	34.104	4	4	173	20	8.62	0.948	1.111	1.109	1.056	1.026	0.971	0.977	0.991333	0.95	0.942	0.968	0.953333	0.938763	0.318048	0.961668	0.116688	0.902778	0.132951
E2R2N8	Uncharacterized protein	34.0741	4	4	135	15.3	9.89	0.8	0.957	0.948	0.901667	1.016	1.373	0.981	1.12333	0.971	0.946	1.009	0.975333	1.24584	0.176417	0.868249	0.307215	1.0817	0.244909
F1PYS6	Uncharacterized protein	34.0697	66	50	2037	232.1	5.6	1.047	1.069	1.018	1.04467	0.999	0.986	0.977	0.987333	1.027	0.934	0.944	0.968333	0.945118	0.0235167	0.980756	0.562892	0.92693	0.0815494
E2R9K5	Uncharacterized protein	34.0426	7	7	188	21.1	5.47	0.997	0.96	0.896	0.951	1.024	1.056	1.022	1.034	1.049	1.032	0.964	1.015	1.08728	0.0578403	0.981625	0.537497	1.0673	0.17877
E2R538	Uncharacterized protein	34.0426	3	3	141	14.8	8.16	0.974	0.865	0.99	0.943	1.083	0.89	1.028	1.00033	0.934	1.197	1.039	1.05667	1.0608	0.456084	1.05631	0.587323	1.12054	0.256476
F1PRR4	Vasodilator-stimulated phosphoprotein	34.026	11	11	385	40.5	7.99	1.003	0.995	0.918	0.972	0.971	1.044	1.016	1.01033	1.02	1.023	1.01	1.01767	1.03944	0.328124	1.00726	0.751558	1.04698	0.17069
E2QUQ3	CTP synthase	34.0102	19	15	591	66.7	6.71	0.967	0.964	0.934	0.955	1.006	1.048	1.015	1.023	0.992	1.045	1.029	1.022	1.0712	0.0147559	0.999022	0.962949	1.07016	0.0239194
F1PP71	Uncharacterized protein	33.9934	9	9	303	32.7	8.05	1.163	1.146	1.152	1.15367	0.97	0.914	0.938	0.940667	0.902	0.895	0.921	0.906	0.815371	0.000231702	0.963147	0.126166	0.785322	1.14458e-05
E2R4L0	Uncharacterized protein	33.9623	14	14	530	59.3	10.1	1.02	0.963	1.011	0.998	0.841	0.972	1.025	0.946	1.057	1.043	1.068	1.056	0.947896	0.416765	1.11628	0.11689	1.05812	0.0386108
F2Z4N1	Uncharacterized protein	33.9506	5	2	162	17.6	10.11	0.957	0.97	0.979	0.968667	1	0.996	1.014	1.00333	1.05	1	1.033	1.02767	1.03579	0.014528	1.02425	0.195175	1.06091	0.0210944
E2QT82	Uncharacterized protein	33.9483	8	8	271	29.7	5.58	1.09	1.033	0.951	1.02467	1.03	0.963	1.021	1.00467	0.994	0.965	0.954	0.971	0.980481	0.682816	0.96649	0.235712	0.947625	0.271112
F6UZV8	Uncharacterized protein	33.936	24	24	719	82.1	5.66	1.014	0.987	1.056	1.019	0.954	0.921	0.988	0.954333	1.046	1.019	1.014	1.02633	0.936539	0.08116	1.07545	0.029628	1.0072	0.759801
E2R273	Uncharacterized protein	33.9332	12	12	389	43.5	6.01	1.001	0.979	1.05	1.01	0.996	0.902	0.995	0.964333	1.031	1.023	1.022	1.02533	0.954785	0.291045	1.06326	0.123096	1.01518	0.509103
F1Q3W8	Succinate dehydrogenase [ubiquinone] iron-sulfur subunit, mitochondrial	33.9286	11	11	280	31.5	8.78	0.985	1.009	0.966	0.986667	0.989	1.023	1.053	1.02167	1.031	0.95	0.994	0.991667	1.03547	0.191352	0.970636	0.371476	1.00507	0.859593
E2RNA3	Uncharacterized protein	33.908	6	6	174	18.8	9.2	1.073	1.054	0.979	1.03533	0.938	0.951	1.035	0.974667	1.048	0.908	1.013	0.989667	0.941404	0.220344	1.01539	0.786926	0.955892	0.42051
E2QZB3	Uncharacterized protein	33.8936	10	10	357	39.3	5.2	1.062	1.013	1.067	1.04733	0.993	0.865	1	0.952667	0.991	0.969	1.04	1	0.909612	0.115037	1.04969	0.385583	0.954806	0.156213
F1PX83	Uncharacterized protein	33.8858	30	30	1086	126.3	5.71	0.991	0.993	0.988	0.990667	1.011	1.003	1.002	1.00533	1.002	1.003	1.008	1.00433	1.0148	0.0101273	0.999005	0.783259	1.0138	0.00439942
J9P504	Uncharacterized protein	33.8802	42	41	1219	138.6	5.47	0.977	0.987	0.991	0.985	0.988	1.013	1.005	1.002	1.004	1.035	1	1.013	1.01726	0.115045	1.01098	0.454419	1.02843	0.0768834
E2RHM4	Isocitrate dehydrogenase [NAD] subunit, mitochondrial	33.8798	12	12	366	39.7	6.73	1.063	0.977	0.955	0.998333	0.937	1.004	1.024	0.988333	1.008	1.022	1.011	1.01367	0.989983	0.824181	1.02563	0.395639	1.01536	0.668419
Q9N1Q2	Y-box protein ZONAB-B	33.871	7	0	372	39.9	9.64	0.748	0.861	1.821	1.14333	0.97	1.281	0.719	0.99	0.88	0.61	1.111	0.867	0.865889	0.705194	0.875758	0.602206	0.758309	0.496562
E2RMC1	Uncharacterized protein	33.8422	14	13	393	44.1	5.73	1.005	0.979	1.012	0.998667	1.025	0.924	1.002	0.983667	1.036	1.003	1.014	1.01767	0.98498	0.665278	1.03456	0.34878	1.01903	0.245143
Q3HTT3	Osteopontin (Fragment)	33.8346	7	1	266	29.6	4.56	2.218	2.866	2.34	2.47467	0.316	0.323	0.305	0.314667	0.211	0.226	0.195	0.210667	0.127155	0.000407892	0.669492	0.000555939	0.0851293	0.000340501
F6Y258	Uncharacterized protein	33.8338	28	28	999	112.4	6.39	1.098	1.069	1.096	1.08767	0.964	0.968	0.977	0.969667	0.945	0.939	0.945	0.943	0.891511	0.000308143	0.972499	0.00353779	0.866994	0.000111287
E2RQH8	Uncharacterized protein	33.7563	11	11	394	43.9	6.16	1.008	0.966	1.031	1.00167	1.035	0.931	1.017	0.994333	1.001	1.01	1.001	1.004	0.992679	0.853753	1.00972	0.779173	1.00233	0.909435
F1PQU2	Uncharacterized protein	33.7524	28	28	1034	116.5	7.05	0.985	0.977	0.99	0.984	1.025	0.964	1.006	0.998333	1.003	1.02	1.03	1.01767	1.01457	0.479834	1.01937	0.381301	1.03421	0.0182934
J9NXT7	Uncharacterized protein	33.75	7	0	160	18.6	10.42	0.982	0.883	1.022	0.962333	0.991	0.86	1.004	0.951667	1.075	1.079	1.103	1.08567	0.988916	0.871386	1.14081	0.0458089	1.12816	0.0432159
F1PM37	DNA mismatch repair protein	33.7259	26	25	934	104.7	5.71	1.063	1.036	1.044	1.04767	0.986	0.974	0.986	0.982	0.962	0.975	0.973	0.97	0.937321	0.00183736	0.98778	0.102449	0.925867	0.000978468
E2QWB2	Uncharacterized protein	33.7043	18	13	629	70.3	5.25	1.08	1.134	1.062	1.092	0.924	1.254	0.933	1.037	0.93	0.837	0.846	0.871	0.949634	0.645272	0.839923	0.214093	0.797619	0.0038214
E2R9U8	Uncharacterized protein	33.7008	18	17	635	69.6	6.93	0.902	0.921	0.921	0.914667	1.134	1.062	1.075	1.09033	0.954	1.028	1.003	0.995	1.19206	0.00158914	0.912565	0.0372241	1.08783	0.0238258
F1P9B2	Uncharacterized protein	33.6752	18	18	585	68.7	5.96	1.021	1.017	1.036	1.02467	1.043	0.942	0.967	0.984	1.007	0.976	0.991	0.991333	0.960312	0.258706	1.00745	0.828201	0.967469	0.0352513
E2RGH8	Uncharacterized protein	33.6554	17	14	621	68.6	6.9	0.96	0.986	0.924	0.956667	1.153	1.033	0.981	1.05567	0.982	0.984	0.996	0.987333	1.10348	0.140728	0.93527	0.252248	1.03206	0.172713
J9P2J0	Uncharacterized protein	33.6	3	3	125	13.4	8.59	1.029	1.115	0.855	0.999667	1.037	1.156	1.034	1.07567	0.965	0.948	0.862	0.925	1.07603	0.428664	0.859932	0.0424878	0.925308	0.418446
F1PAR0	Dihydrolipoyl dehydrogenase	33.5953	14	14	509	54.2	7.85	0.989	0.967	0.98	0.978667	0.97	0.963	1.043	0.992	1.04	1.011	1.036	1.029	1.01362	0.639648	1.0373	0.244502	1.05143	0.0105263
E2RL58	3-hydroxyisobutyryl-CoA hydrolase, mitochondrial	33.5938	9	9	384	42.9	6.86	0.931	0.868	1.02	0.939667	1.075	0.952	1.037	1.02133	1.032	1.072	1.012	1.03867	1.08691	0.226219	1.01697	0.690083	1.10536	0.105462
F1PLD7	Uncharacterized protein	33.5714	18	17	700	76.7	8.7	0.959	0.902	0.996	0.952333	0.988	1.013	0.961	0.987333	1.031	1.062	1.087	1.06	1.03675	0.324618	1.0736	0.0302094	1.11306	0.0275759
E2RR01	Uncharacterized protein	33.5404	12	11	483	54.4	8.66	1.011	1.013	1.03	1.018	0.969	0.991	1.013	0.991	0.989	1.001	0.983	0.991	0.973477	0.127209	1	1	0.973477	0.0281414
E2QWE0	Uncharacterized protein	33.5329	7	7	334	37.5	6.54	1.013	0.946	0.997	0.985333	1.034	0.921	0.99	0.981667	1.002	1.088	1.009	1.033	0.996279	0.92888	1.05229	0.297698	1.04838	0.235635
F1PRN2	Uncharacterized protein	33.499	32	32	1006	116	9.33	1.06	1.056	1.02	1.04533	1.083	0.973	0.956	1.004	0.957	0.962	0.933	0.950667	0.960459	0.378582	0.946879	0.261203	0.909439	0.0036832
J9NX28	Uncharacterized protein	33.4951	6	3	206	23.5	7.11	0.905	0.938	0.891	0.911333	1.1	1.156	0.986	1.08067	0.941	1.051	1.031	1.00767	1.18581	0.0310426	0.932449	0.293261	1.10571	0.0580009
E2RQV6	Uncharacterized protein	33.4857	26	26	875	100.5	6.01	0.947	0.98	0.985	0.970667	0.998	0.971	0.987	0.985333	1.043	1.038	1.05	1.04367	1.01511	0.362051	1.0592	0.00244109	1.07521	0.00418492
F1Q3S9	ATP-dependent 6-phosphofructokinase	33.4615	21	17	780	85.2	7.34	1	1.007	1.008	1.005	1.03	1.017	0.961	1.00267	1.017	0.996	0.964	0.992333	0.997678	0.918113	0.989694	0.713235	0.987396	0.462723
J9NSD0	Density-regulated protein	33.4545	7	7	275	29.4	6.3	0.917	0.933	0.955	0.935	0.995	1.08	1.017	1.03067	1.039	1.038	1.025	1.034	1.10232	0.0261179	1.00323	0.903685	1.10588	0.00114134
E2QVV3	Uncharacterized protein	33.4426	9	9	305	34.6	10.13	0.938	0.943	0.941	0.940667	1.068	1.027	1.019	1.038	0.994	1.049	1.022	1.02167	1.10347	0.0030892	0.984265	0.498412	1.08611	0.00707988
F1PNF3	Uncharacterized protein	33.4272	49	13	1421	156.8	5.25	0.97	1.004	1.034	1.00267	1.003	1.025	0.977	1.00167	0.982	0.994	1.011	0.995667	0.999003	0.967564	0.99401	0.730265	0.993019	0.747728
E2RQ99	Uncharacterized protein	33.3952	13	13	539	58.5	7.99	0.966	1.011	0.961	0.979333	1.026	1.031	0.983	1.01333	1.032	0.994	0.996	1.00733	1.03472	0.197459	0.994079	0.774894	1.02859	0.236619
J9NWS6	Uncharacterized protein	33.3682	27	17	956	105.4	7.66	0.99	1.023	1.003	1.00533	0.977	1.031	0.966	0.991333	1.006	1.005	0.999	1.00333	0.986074	0.563542	1.0121	0.584521	0.998011	0.848907
E2R5Y7	Uncharacterized protein	33.3658	57	1	2053	230.8	5.82	1.045	1.145	0.999	1.063	0.918	1.129	0.892	0.979667	1.028	0.963	0.88	0.957	0.921606	0.390094	0.976863	0.806022	0.900282	0.155998
F1PLB9	Uncharacterized protein	33.3333	5	5	237	25.8	5.35	1.062	1.115	1.035	1.07067	1.029	1.039	0.96	1.00933	0.928	0.936	0.897	0.920333	0.942715	0.147272	0.911823	0.0319104	0.859589	0.00465675
E2RG68	Uncharacterized protein	33.3333	5	5	183	21	5.43	1.046	1.074	0.976	1.032	1.063	1.05	1.017	1.04333	0.928	0.909	0.938	0.925	1.01098	0.742616	0.886581	0.00183247	0.896318	0.0243511
E2RLZ9	Uncharacterized protein	33.3333	6	6	210	22.3	6	1.019	1.033	0.96	1.004	0.92	1.141	0.936	0.999	1.016	1.01	0.964	0.996667	0.99502	0.949768	0.997664	0.976039	0.992696	0.80464
E2RT84	Uncharacterized protein	33.3333	3	3	204	23	4.41	0.992	1.111	1.001	1.03467	1.072	1.302	1.012	1.12867	0.875	0.871	0.764	0.836667	1.09085	0.384298	0.741288	0.0378232	0.808634	0.0199127
E2R5T1	ER membrane protein complex subunit 4	33.3333	5	5	183	20.1	8.62	0.972	0.98	0.958	0.97	1.063	1.007	1.055	1.04167	1.001	0.994	0.97	0.988333	1.07388	0.018355	0.9488	0.0548129	1.0189	0.182387
E2RSF2	Superoxide dismutase	33.3333	8	8	222	24.8	8.25	0.966	0.949	0.867	0.927333	1.035	1.058	1.034	1.04233	1.011	1.039	1.041	1.03033	1.12401	0.0218731	0.988487	0.390004	1.11107	0.0325067
F1PT17	Uncharacterized protein	33.3333	6	5	228	25.5	6.76	0.941	0.91	0.997	0.949333	0.988	1.029	1.022	1.013	1.016	1.047	1.051	1.038	1.06706	0.0887036	1.02468	0.211227	1.0934	0.0330769
F1PSM2	Alpha-1,4 glucan phosphorylase	33.3021	29	27	1066	119.8	9.41	1.006	0.999	0.965	0.99	0.974	1.009	1.01	0.997667	1.039	1.003	0.996	1.01267	1.00774	0.68113	1.01504	0.447312	1.0229	0.28498
E2RLP4	Uncharacterized protein	33.2918	19	19	802	92.2	8.18	0.972	1.027	0.969	0.989333	0.997	1.062	0.993	1.01733	0.999	0.996	0.985	0.993333	1.0283	0.392641	0.976409	0.351228	1.00404	0.846151
E2RL06	Uncharacterized protein	33.2215	8	8	298	35	6.35	0.939	0.996	0.993	0.976	0.969	1.008	1	0.992333	1.019	1.02	1.057	1.032	1.01673	0.499246	1.03997	0.0830591	1.05738	0.0663352
F1P969	Eukaryotic translation initiation factor 3 subunit B	33.2103	25	25	813	92	5.1	0.981	0.974	1.011	0.988667	0.99	1.004	0.986	0.993333	0.991	1.043	1.018	1.01733	1.00472	0.72972	1.02416	0.207439	1.029	0.202392
E2R7F3	Uncharacterized protein	33.1719	11	11	413	45.8	6.61	1.032	0.982	1.074	1.02933	1.005	0.954	1.008	0.989	0.97	0.997	0.979	0.982	0.960816	0.274048	0.992922	0.734343	0.954016	0.16327
F1PD37	Serine/threonine-protein phosphatase 2A activator	33.1269	9	9	323	36.8	6.19	1.045	1.028	0.991	1.02133	0.949	0.983	1.024	0.985333	1.011	0.999	0.97	0.993333	0.964752	0.251978	1.00812	0.763755	0.972585	0.235175
F1Q1T5	Uncharacterized protein	33.0435	4	4	115	13.4	10.71	1.002	0.944	1.161	1.03567	0.955	0.746	0.999	0.9	1.123	0.948	1.123	1.06467	0.869005	0.252221	1.18296	0.166282	1.028	0.756256
E2RDL8	Uncharacterized protein	33.0391	21	21	793	88.7	5.22	0.987	1.005	0.985	0.992333	0.99	1.008	1.005	1.001	1.011	0.997	1.013	1.007	1.00873	0.363159	1.00599	0.468834	1.01478	0.144818
E2REX3	Uncharacterized protein	33.0128	7	7	312	34.5	5.27	1.031	0.963	1.008	1.00067	1.007	0.971	0.985	0.987667	0.974	1.016	1.044	1.01133	0.987009	0.595185	1.02396	0.359417	1.01066	0.727248
E2R944	Uncharacterized protein	32.9932	16	15	588	64	8.22	1.084	0.968	1.148	1.06667	0.967	0.891	0.986	0.948	0.996	0.97	0.99	0.985333	0.88875	0.119757	1.03938	0.282211	0.92375	0.201464
J9P4Y2	Protein S100	32.9897	5	5	97	11	4.56	0.924	0.978	0.966	0.956	0.848	1.108	1.02	0.992	1.099	1.012	1.045	1.052	1.03766	0.668728	1.06048	0.497232	1.10042	0.0335153
J9P4U8	Uncharacterized protein	32.9815	10	10	379	41.4	9.13	1.027	0.957	1.065	1.01633	1.024	0.985	1.046	1.01833	0.96	0.956	0.98	0.965333	1.00197	0.958717	0.947954	0.0517232	0.94982	0.19156
F6XLB5	Uncharacterized protein	32.9718	10	7	461	50.4	8.69	1.014	0.995	0.989	0.999333	0.993	1.017	0.974	0.994667	0.953	1.033	1.033	1.00633	0.99533	0.764392	1.01173	0.711996	1.007	0.81302
E2RLX2	Uncharacterized protein	32.9435	14	14	513	57.6	7.5	1.13	1.007	1.066	1.06767	0.996	0.928	1.043	0.989	0.951	0.939	0.94	0.943333	0.926319	0.181839	0.953825	0.245714	0.883547	0.0253436
E2R0P2	Uncharacterized protein	32.9331	13	13	583	66.8	5.38	1.018	0.973	1.016	1.00233	0.995	0.923	1.008	0.975333	0.994	1.037	1.037	1.02267	0.973063	0.422341	1.04853	0.190581	1.02029	0.377732
F6XMP7	Small glutamine-rich tetratricopeptide repeat-containing protein alpha	32.9073	10	10	313	34.2	5.01	1.06	0.903	1.071	1.01133	0.983	0.833	0.996	0.937333	1.031	1.073	1.051	1.05167	0.926829	0.381735	1.12198	0.100261	1.03988	0.508352
F1PIA2	Ubiquitin thioesterase	32.8413	7	7	271	31.4	5.1	0.997	1	1.02	1.00567	0.997	0.978	1.006	0.993667	1.021	0.977	1.003	1.00033	0.988068	0.335247	1.00671	0.683718	0.994697	0.734599
F1PQA0	Uncharacterized protein	32.8358	7	7	335	37.3	6.13	0.971	0.805	1.1	0.958667	1.001	0.833	1.038	0.957333	1.041	1.172	1.039	1.084	0.998609	0.99058	1.13231	0.174913	1.13074	0.261959
E2R561	Uncharacterized protein	32.7974	9	9	311	34.6	5.41	0.936	0.99	0.956	0.960667	0.999	1.071	0.996	1.022	0.973	1.021	1.058	1.01733	1.06384	0.103139	0.995434	0.899611	1.05899	0.124489
E2RJQ8	Uncharacterized protein	32.7635	9	9	351	40.4	4.96	0.971	1.04	0.949	0.986667	0.982	1.018	1.026	1.00867	1.029	1.001	0.983	1.00433	1.0223	0.511546	0.995704	0.831056	1.01791	0.593544
E2RG82	Uncharacterized protein	32.7623	10	9	467	53.1	7.55	1.048	1.094	1	1.04733	1.029	0.962	0.984	0.991667	0.972	0.939	0.973	0.961333	0.946849	0.172354	0.969412	0.25174	0.917887	0.0427927
E2R514	Uncharacterized protein	32.7586	10	10	464	50.7	8.31	0.978	0.96	0.978	0.972	1.041	0.909	1.044	0.998	1.026	1.039	1.026	1.03033	1.02675	0.593677	1.0324	0.509675	1.06001	0.00140109
E2QYD8	Uncharacterized protein	32.7273	5	5	110	12.5	11.06	0.956	0.972	0.925	0.951	0.939	1.004	0.983	0.975333	1.039	1.11	1.072	1.07367	1.02559	0.360825	1.10082	0.0248069	1.12899	0.00769454
E2RNY1	Uncharacterized protein	32.7103	21	20	856	95.8	6.77	0.948	1.029	0.944	0.973667	0.976	1.037	1.033	1.01533	1.03	1	1.003	1.011	1.04279	0.287413	0.995732	0.852721	1.03834	0.271427
E2RTJ0	Anamorsin	32.6984	9	9	315	33.8	5.47	1.115	1.04	1.043	1.066	1.002	0.958	0.998	0.986	0.969	0.949	0.927	0.948333	0.924953	0.0472789	0.961799	0.112271	0.889619	0.0126256
E2QUL3	Uncharacterized protein	32.6648	18	18	698	77.9	7.81	1.001	0.96	1.021	0.994	1.045	0.924	1.015	0.994667	1.017	1.008	1.009	1.01133	1.00067	0.987676	1.01676	0.671561	1.01744	0.394319
E2RSV7	Nuclear pore complex protein Nup93	32.6486	29	29	925	104.1	6.79	0.931	0.882	0.898	0.903667	1.209	1.11	1.168	1.16233	0.926	0.931	0.944	0.933667	1.28624	0.00129382	0.803269	0.00143866	1.0332	0.123075
J9P540	Glyceraldehyde-3-phosphate dehydrogenase	32.6347	9	1	334	36.1	7.53	0.539	1.349	0.658	0.848667	0.703	2.072	0.678	1.151	1.161	0.875	0.966	1.00067	1.35625	0.595711	0.869389	0.764229	1.1791	0.598594
F1PMB5	Uncharacterized protein	32.5871	13	10	402	46.1	7.24	1.046	0.985	0.997	1.00933	0.938	0.924	1.008	0.956667	1.068	1.015	1.02	1.03433	0.94782	0.175015	1.08118	0.0663431	1.02477	0.376819
F1PX50	Uncharacterized protein	32.5815	8	8	399	41.6	9.04	0.929	0.961	0.932	0.940667	1.075	1.005	1.072	1.05067	1.025	1.019	0.982	1.00867	1.11694	0.0117304	0.960025	0.188326	1.07229	0.0157498
E2RBV8	Uncharacterized protein	32.5806	8	7	310	31.1	9.31	0.924	0.991	0.925	0.946667	1.088	1.081	0.995	1.05467	1.007	1.004	0.985	0.998667	1.11408	0.0440548	0.946903	0.142048	1.05493	0.088619
F6XD78	Uncharacterized protein	32.5301	29	28	1079	120.9	5.74	1.041	1.006	1.079	1.042	1.015	0.905	1.003	0.974333	0.982	0.982	0.986	0.983333	0.935061	0.171897	1.00924	0.809037	0.943698	0.0499409
F1PME4	Uncharacterized protein	32.5253	14	13	495	56.8	5.95	1.024	1.022	0.957	1.001	0.94	1.051	1.012	1.001	0.985	1.009	1.001	0.998333	1	1	0.997336	0.939963	0.997336	0.9137
F1PWX2	Uncharacterized protein	32.5203	6	6	246	29.4	4.73	0.988	0.971	0.923	0.960667	0.995	1.048	1.019	1.02067	0.995	1.05	1.012	1.019	1.06246	0.0725839	0.998367	0.944113	1.06072	0.0829168
J9PAN4	Uncharacterized protein	32.4675	6	6	231	24.7	7.23	1.024	0.916	1.087	1.009	1.001	0.837	0.998	0.945333	1.021	1.062	1.054	1.04567	0.936901	0.436235	1.10614	0.145508	1.03634	0.515669
E2RPE8	Uncharacterized protein	32.4444	6	6	225	24.7	9.89	0.955	0.906	1.004	0.955	1.033	0.933	1.029	0.998333	1.029	1.058	1.052	1.04633	1.04538	0.37287	1.04808	0.229289	1.09564	0.0368752
F1PXF8	Uncharacterized protein	32.4356	23	22	854	95.6	8.63	1.039	1.029	0.983	1.017	0.984	0.956	1.005	0.981667	1.043	0.981	0.98	1.00133	0.965257	0.188792	1.02003	0.47891	0.984595	0.59346
O46882	MHC class I DLA-88	32.41	8	0	361	40.4	6.2	1.303	1.391	1.224	1.306	0.876	0.996	0.868	0.913333	0.745	0.793	0.803	0.780333	0.699336	0.00348775	0.85438	0.0420175	0.597499	0.000517022
E2RM30	Uncharacterized protein	32.3988	8	8	321	35.8	7.17	0.917	0.926	0.885	0.909333	1.099	1.1	1.105	1.10133	0.98	1.02	0.969	0.989667	1.21114	0.000107437	0.898608	0.00201891	1.08834	0.0155708
J9NTU0	Uncharacterized protein	32.3988	11	1	321	34.6	7.81	0.839	1.21	0.642	0.897	1.082	1.089	1.137	1.10267	1.147	0.92	0.933	1	1.22928	0.286582	0.906892	0.245999	1.11483	0.601777
F1PAN3	Uncharacterized protein	32.3699	13	13	519	59.5	7.8	1.008	1.004	0.958	0.99	0.964	0.961	1.01	0.978333	1.058	0.999	1.038	1.03167	0.988215	0.632282	1.05451	0.0856395	1.04209	0.152366
E2R9J9	Uncharacterized protein	32.3296	33	33	1262	139.8	6.65	1.012	1.039	0.977	1.00933	0.995	0.974	0.974	0.981	1.017	1.001	1.01	1.00933	0.971929	0.21531	1.02888	0.0278941	1	1
E2R1A0	Uncharacterized protein	32.312	8	5	359	39.5	9.98	0.92	0.958	0.983	0.953667	0.961	0.956	0.919	0.945333	1.12	1.079	1.103	1.10067	0.991262	0.731047	1.16432	0.000950182	1.15414	0.00253733
E2RPE9	Uncharacterized protein	32.2892	12	12	415	46.3	6.13	0.962	0.962	0.995	0.973	0.985	0.966	1.012	0.987667	1.054	1.029	1.035	1.03933	1.01507	0.444182	1.05231	0.0280137	1.06817	0.00762436
F1PXD3	Uncharacterized protein	32.2767	9	9	347	39.3	7.43	0.926	0.996	0.969	0.963667	0.988	1.08	0.999	1.02233	0.992	1.044	1.006	1.014	1.06088	0.173309	0.991849	0.812559	1.05223	0.120995
J9NRF6	Uncharacterized protein	32.2551	26	26	1082	118.6	7.9	1.017	1.036	0.975	1.00933	1.007	0.99	1	0.999	1.036	0.951	0.988	0.991667	0.989762	0.609687	0.992659	0.78465	0.982497	0.59348
E2QXP4	Thymidine kinase	32.2314	6	6	242	26.4	8.72	1	0.939	1.051	0.996667	0.961	0.952	0.962	0.958333	0.981	1.058	1.096	1.045	0.961538	0.303956	1.09043	0.063256	1.04849	0.36028
E2RKK6	Uncharacterized protein	32.216	14	14	537	60.5	4.46	0.966	1.024	0.993	0.994333	0.976	0.971	0.981	0.976	1.041	1.034	1.016	1.03033	0.981562	0.341616	1.05567	0.00243852	1.03621	0.121094
E2R198	Peptidyl-prolyl cis-trans isomerase	32.2034	6	5	177	19.2	8.07	1.028	0.851	1.173	1.01733	1.081	0.82	1.048	0.983	0.95	1.026	1.022	0.999333	0.966252	0.795756	1.01662	0.858115	0.982307	0.86086
F1P909	Uncharacterized protein	32.1918	4	4	146	17	8.92	0.877	0.936	1.068	0.960333	1.115	0.895	1.019	1.00967	1.033	1.013	1.043	1.02967	1.05137	0.593224	1.01981	0.771261	1.0722	0.291786
F1PUN9	Uncharacterized protein	32.1839	11	4	261	29.6	4.03	0.927	0.821	1.085	0.944333	1.029	1.103	1.039	1.057	0.976	1.013	1.008	0.999	1.11931	0.232421	0.945128	0.0888233	1.05789	0.519853
E2R4X9	Uncharacterized protein	32.1199	64	63	2335	273.4	8.84	1.044	1.085	1.038	1.05567	0.935	0.956	0.959	0.95	1.013	0.968	1.002	0.994333	0.899905	0.00311346	1.04667	0.0459732	0.941901	0.037632
E2R161	Uncharacterized protein	32.107	7	1	299	33.3	4.65	1.762	2.04	2.169	1.99033	0.544	0.578	0.483	0.535	0.492	0.479	0.452	0.474333	0.268799	0.000294514	0.886604	0.114818	0.238319	0.000230955
J9NY82	Uncharacterized protein	32.0988	1	1	81	9.3	4.59	0.943	0.902	1.063	0.969333	1.112	1.019	0.905	1.012	0.976	0.982	1.097	1.01833	1.04402	0.608653	1.00626	0.933809	1.05055	0.475665
E2REA8	Uncharacterized protein	32.0542	13	13	443	51.6	5.53	1.067	1.054	0.922	1.01433	0.935	0.973	1.033	0.980333	1.047	0.971	0.997	1.005	0.96648	0.565847	1.02516	0.533125	0.990799	0.864761
F1PV92	Citrate synthase	32.0513	13	13	468	52.1	8	0.956	0.976	0.966	0.966	1.034	0.984	1.004	1.00733	1.032	1.001	1.048	1.027	1.04279	0.0573587	1.01952	0.38189	1.06315	0.0151137
E2R9J8	Protein arginine N-methyltransferase 5	32.0251	17	17	637	72.6	6.29	0.988	0.974	0.972	0.978	1.034	1.02	1	1.018	1.009	1.002	1.001	1.004	1.0409	0.022525	0.986248	0.241117	1.02658	0.00987871
F1PFL7	Uncharacterized protein	32	5	5	150	17	8.07	1.088	0.84	1.094	1.00733	1.063	0.746	1.082	0.963667	0.938	1.103	1.046	1.029	0.956651	0.766526	1.0678	0.612862	1.02151	0.83363
E2RAW0	Uncharacterized protein	32	10	10	350	39.9	8.65	0.963	1.001	0.946	0.97	0.951	0.954	1.038	0.981	1.052	1.049	1.044	1.04833	1.01134	0.754363	1.06864	0.0782059	1.08076	0.00884541
F1PDM3	Uncharacterized protein	31.9876	9	9	322	35.5	5.38	1.015	1.02	0.955	0.996667	0.97	0.941	1.045	0.985333	1.05	0.981	1.022	1.01767	0.988629	0.776778	1.03281	0.430359	1.02107	0.508248
F1P7F8	Uncharacterized protein	31.9716	12	12	563	60	8.56	1.085	0.968	0.984	1.01233	1.018	0.995	0.957	0.99	0.935	1.035	1.023	0.997667	0.977939	0.612514	1.00774	0.842608	0.985512	0.776636
F1PVM9	Uncharacterized protein	31.9654	12	12	463	52.4	6.84	0.969	0.938	0.972	0.959667	1.024	0.981	1.035	1.01333	1.021	1.023	1.039	1.02767	1.05592	0.0530379	1.01414	0.457137	1.07086	0.005184
E2RRP1	Uncharacterized protein	31.9149	10	10	423	46.4	8.57	1.001	1.001	1.021	1.00767	0.998	0.893	1.026	0.972333	1.054	0.99	1.015	1.01967	0.964935	0.437682	1.04868	0.348001	1.01191	0.576803
E2RF32	Uncharacterized protein	31.9018	3	3	163	17.3	9.64	0.859	0.94	0.945	0.914667	1.045	1.084	1.06	1.063	1.141	0.975	0.951	1.02233	1.16217	0.00788045	0.961743	0.540249	1.11771	0.177736
Q1AN87	MHC class I antigen (Fragment)	31.8681	5	0	182	20.7	5.67	1.181	1.192	1.131	1.168	1.078	1.094	0.964	1.04533	0.735	0.756	0.871	0.787333	0.894977	0.0527532	0.753189	0.0118293	0.674087	0.00118813
E2RAF2	Uncharacterized protein	31.8584	17	13	565	64.4	5.95	1.01	1.019	0.958	0.995667	1.008	0.999	1.01	1.00567	0.997	0.995	1.004	0.998667	1.01004	0.631881	0.993039	0.18255	1.00301	0.883444
E2QZV1	Uncharacterized protein	31.8501	8	8	427	47.1	5.2	0.941	0.896	0.968	0.935	1.106	0.978	1.114	1.066	0.973	1.044	0.979	0.998667	1.14011	0.055004	0.936836	0.245988	1.06809	0.108796
F1Q0S2	Sodium/potassium-transporting ATPase subunit beta	31.8386	7	7	223	24.9	7.01	1.097	1.017	1.054	1.056	1.028	0.9	1.001	0.976333	0.923	0.967	1.013	0.967667	0.924558	0.153435	0.991123	0.862166	0.916351	0.0639817
P52206	Guanine nucleotide-binding protein subunit alpha-11 (Fragment)	31.8182	5	3	198	23.1	6.7	1.021	1.033	1.032	1.02867	1.048	1.016	1.014	1.026	0.899	0.985	0.952	0.945333	0.997408	0.830412	0.921378	0.0420557	0.918989	0.0302628
J9NXC6	Uncharacterized protein	31.8182	6	1	198	21.6	4.97	1.008	0.972	0.951	0.977	1.074	1.019	0.985	1.026	1.007	0.993	0.99	0.996667	1.05015	0.186968	0.97141	0.329663	1.02013	0.322722
E2RJB9	Uncharacterized protein	31.8182	5	5	198	22	5.15	0.928	0.988	0.923	0.946333	0.929	1.219	0.934	1.02733	0.981	1.091	1.008	1.02667	1.08559	0.45535	0.999351	0.995069	1.08489	0.109352
J9P5W6	Uncharacterized protein	31.8066	11	6	393	43.4	6.62	0.935	1.006	0.961	0.967333	1.002	1.003	0.994	0.999667	1.063	0.994	1.042	1.033	1.03343	0.197339	1.03334	0.181251	1.06788	0.0870471
F1PU84	Uncharacterized protein	31.7757	3	3	107	12.3	7.12	1.015	0.967	0.93	0.970667	1.05	1.005	0.975	1.01	1.067	0.977	1.015	1.01967	1.04052	0.297526	1.00957	0.790232	1.05048	0.24357
E2RDT8	Uncharacterized protein	31.7708	4	4	192	21.1	7.96	0.87	0.903	1.004	0.925667	1.088	1.056	1.088	1.07733	0.968	1.059	0.963	0.996667	1.16385	0.0220144	0.925124	0.0707157	1.0767	0.236074
F1PPB6	Uncharacterized protein	31.761	7	7	318	35.2	8.95	0.969	1.022	1.024	1.005	1.086	0.937	1.019	1.014	0.99	1.005	0.949	0.981333	1.00896	0.856561	0.967784	0.518724	0.976451	0.390247
E2RA73	Uncharacterized protein	31.7597	6	6	233	26.1	5.72	1.029	1.021	1.011	1.02033	0.921	0.911	0.896	0.909333	1.095	1.044	1.071	1.07	0.891212	0.000241707	1.17669	0.000612057	1.04868	0.0335718
F1Q1H3	Uncharacterized protein	31.746	5	5	189	21.7	5.4	0.904	0.862	0.846	0.870667	1.169	1.063	1.235	1.15567	1.014	0.944	0.963	0.973667	1.32734	0.00577841	0.842515	0.0284933	1.1183	0.0191544
E2RQP7	Uncharacterized protein	31.7406	7	7	293	31.4	5.96	1.064	0.99	1.098	1.05067	1.032	1.01	1.019	1.02033	0.943	0.948	0.894	0.928333	0.971129	0.403681	0.909833	0.00745117	0.883566	0.0278938
E2RD29	CTP synthase	31.7406	17	13	586	65.4	6.35	0.988	1.021	0.966	0.991667	1.022	1.036	1.001	1.01967	1.025	0.966	0.974	0.988333	1.02824	0.213476	0.969271	0.211588	0.996639	0.898067
J9P1V7	Uncharacterized protein	31.7308	2	2	104	11.5	8.79	0.835	0.984	0.91	0.909667	1.145	1.115	1.039	1.09967	0.976	0.988	1.008	0.990667	1.20887	0.0235435	0.900879	0.0295615	1.08904	0.139545
F1PUX9	Uncharacterized protein	31.7191	9	9	413	48.8	5.95	1.071	1.073	1.133	1.09233	0.961	0.918	0.992	0.957	0.993	0.915	0.945	0.951	0.876106	0.0102033	0.99373	0.857079	0.870613	0.00977011
E2RKS4	Uncharacterized protein	31.6993	18	18	612	69.1	5.8	1.017	0.999	0.964	0.993333	0.978	1.008	1.004	0.996667	1.019	0.998	1.012	1.00967	1.00336	0.86345	1.01304	0.312176	1.01644	0.384454
E2RG17	Uncharacterized protein	31.6667	7	7	240	27.5	8.29	0.97	0.863	0.998	0.943667	1.058	0.965	0.985	1.00267	1.025	1.097	1.041	1.05433	1.06252	0.302617	1.05153	0.221491	1.11727	0.076282
E2QRT0	Uncharacterized protein	31.6667	14	13	420	46.3	9.57	0.931	0.933	0.995	0.953	1.064	0.975	1.081	1.04	0.978	1.019	1.024	1.007	1.09129	0.089583	0.968269	0.410634	1.05666	0.102247
E2RQ42	Uncharacterized protein	31.6364	6	6	275	31.4	4.92	0.905	1.027	0.935	0.955667	0.983	1.226	0.96	1.05633	1.007	0.977	0.981	0.988333	1.10534	0.338436	0.935626	0.471489	1.03418	0.437214
F1PGT8	Uncharacterized protein	31.6239	16	16	585	65.1	8.95	0.995	0.975	0.958	0.976	1.021	1.015	1.035	1.02367	0.99	1.008	1.004	1.00067	1.04884	0.0175534	0.977532	0.0461508	1.02527	0.109099
J9PAB2	Calnexin	31.5966	19	1	595	67.5	4.61	0.624	0.87	0.899	0.797667	0.958	1.014	1.082	1.018	1.176	1.11	1.267	1.18433	1.27622	0.0797155	1.16339	0.0454274	1.48475	0.0171067
E2R6L1	Uncharacterized protein	31.588	38	38	1738	181.3	4.84	1.019	1.043	0.997	1.01967	1.026	1.043	1.008	1.02567	0.982	0.933	0.949	0.954667	1.00588	0.737399	0.930777	0.0157195	0.936254	0.0295266
F1PIV3	Uncharacterized protein	31.5508	11	10	374	42.4	6.16	0.956	0.973	0.949	0.959333	0.969	1.025	0.996	0.996667	1.057	1.05	1.026	1.04433	1.03892	0.102164	1.04783	0.0633383	1.0886	0.00195932
E2RML8	Uncharacterized protein	31.4607	6	6	267	30.1	6.06	0.93	0.953	0.96	0.947667	1.037	1.039	1.047	1.041	0.996	1.007	1.031	1.01133	1.09849	0.000617335	0.971502	0.0512078	1.06718	0.00978936
F6PME1	Galectin	31.4381	10	10	299	31	8.78	0.94	0.945	0.922	0.935667	1.018	0.991	1.027	1.012	1.121	0.997	1.038	1.052	1.08158	0.00405655	1.03953	0.352389	1.12433	0.0350972
E2RGQ0	Uncharacterized protein	31.4286	6	6	245	28.1	9.5	1.014	0.97	0.964	0.982667	0.971	1.078	1.009	1.01933	0.97	1.025	0.998	0.997667	1.03731	0.354678	0.978744	0.570584	1.01526	0.539294
E2RS47	Uncharacterized protein	31.383	9	9	376	42.5	6.42	1.284	1.115	1.164	1.18767	0.831	0.696	0.962	0.829667	1.036	0.941	0.971	0.982667	0.698569	0.0175092	1.18441	0.134584	0.827393	0.0234757
E2QZQ5	Uncharacterized protein	31.3793	6	6	290	32.6	5.03	0.993	1.069	0.952	1.00467	1.002	0.957	1.065	1.008	1.024	0.961	0.978	0.987667	1.00332	0.946214	0.979828	0.607544	0.983079	0.686156
E2RN29	Uncharacterized protein	31.3725	10	10	408	46.6	7.81	1.11	1.088	1.02	1.07267	0.939	0.886	0.949	0.924667	1.043	0.965	1	1.00267	0.862026	0.0114177	1.08435	0.0592168	0.934742	0.118013
E2RB43	Uncharacterized protein	31.3725	19	19	663	75.5	6.54	0.99	1.138	0.913	1.01367	0.976	1.192	1.009	1.059	0.955	0.911	0.916	0.927333	1.04472	0.655451	0.875669	0.127383	0.914831	0.269872
J9NZU7	Peptidyl-prolyl cis-trans isomerase	31.3559	3	3	118	12.7	8.68	1.028	0.984	1.047	1.01967	1.035	0.992	1.055	1.02733	0.925	0.98	0.954	0.953	1.00752	0.785434	0.927644	0.0383917	0.934619	0.0529514
J9P2K2	Uncharacterized protein	31.3433	8	8	335	36.4	5.88	0.971	1.011	0.926	0.969333	1.009	1.049	1.044	1.034	1.014	0.982	0.993	0.996333	1.06671	0.0790324	0.963572	0.074407	1.02785	0.362377
A0A060GW64	ATP synthase protein 8	31.3433	2	2	67	8	9.19	0.902	1.016	0.949	0.955667	0.977	1.047	1.039	1.021	1.024	1.022	1.022	1.02267	1.06836	0.175966	1.00163	0.943585	1.07011	0.112835
J9P7R9	Uncharacterized protein	31.3043	5	5	230	24.8	6.4	0.996	1.017	0.882	0.965	1.031	1.07	1.034	1.045	1.013	0.975	0.981	0.989667	1.0829	0.141614	0.947049	0.0324164	1.02556	0.60153
E2RE24	NEDD8-activating enzyme E1 regulatory subunit	31.2734	11	11	534	60.3	5.59	1.015	0.975	0.958	0.982667	1.056	0.997	1.015	1.02267	0.994	1.001	0.99	0.995	1.04071	0.175014	0.972947	0.194103	1.01255	0.512941
H9GW98	Metallothionein	31.25	2	2	64	6.3	8.12	0.998	0.674	0.959	0.877	0.65	0.319	1.039	0.669333	1.491	1.383	1.487	1.45367	0.763208	0.42092	2.17181	0.0205409	1.65754	0.00594073
F6X834	Histone H2A	31.25	4	2	128	13.5	10.58	0.888	0.992	0.949	0.943	1.044	0.974	1.084	1.034	1.091	0.96	1.018	1.023	1.0965	0.10795	0.989362	0.835663	1.08484	0.173992
E2R0G3	Uncharacterized protein	31.2102	12	12	471	53.1	9.09	1.001	0.962	0.977	0.98	1.034	1.007	0.986	1.009	1.012	1.016	1.006	1.01133	1.02959	0.181376	1.00231	0.87739	1.03197	0.055652
J9P9C5	Uncharacterized protein	31.1321	5	1	106	12.5	10.48	1.22	0.941	0.945	1.03533	0.727	1.025	0.987	0.913	0.985	1.18	0.991	1.052	0.881842	0.404928	1.15225	0.287666	1.0161	0.889262
D0VWQ4	60S ribosomal protein L36a	31.1321	5	1	106	12.4	10.58	1.023	0.998	0.921	0.980667	0.853	1.037	0.992	0.960667	1.102	1.042	1.033	1.059	0.979606	0.767891	1.10236	0.17353	1.07988	0.105391
F1PS15	Uncharacterized protein	31.1164	10	10	421	46.1	9.98	1.055	1.044	0.958	1.019	0.934	1.02	1.005	0.986333	1.017	0.967	1.001	0.995	0.967942	0.465575	1.00879	0.789356	0.976447	0.519487
E2R2A8	Uncharacterized protein	31.1111	8	7	225	25.4	9.72	0.943	0.991	0.88	0.938	0.975	1.021	1.062	1.01933	1.074	1.001	1.053	1.04267	1.08671	0.116971	1.02289	0.520919	1.11158	0.0541456
E2RS43	Uncharacterized protein	31.0912	20	20	669	69.5	9.67	0.983	0.977	0.936	0.965333	1.004	0.987	1.024	1.005	1.035	1.017	1.036	1.02933	1.04109	0.0952186	1.02421	0.120057	1.0663	0.0161534
F6XKI0	Pyrroline-5-carboxylate reductase	31.085	9	5	341	35.6	8.27	0.931	0.928	0.937	0.932	1.068	1.124	0.969	1.05367	0.969	1.034	1.039	1.014	1.13054	0.0552086	0.962354	0.477017	1.08798	0.0225129
E2QWV0	Uncharacterized protein	31.0837	34	34	1052	121.9	8.09	1.01	1.059	1.013	1.02733	0.953	0.998	0.979	0.976667	0.997	0.989	1.003	0.996333	0.950681	0.0691161	1.02014	0.223319	0.969825	0.131141
F1PAE8	Uncharacterized protein	31.0606	5	5	132	15	8.68	1.077	1.035	1.032	1.048	1.04	0.93	1.017	0.995667	0.943	0.96	0.965	0.956	0.950064	0.225056	0.960161	0.31005	0.912214	0.00451395
E2R9E3	Uncharacterized protein	31.0526	30	30	1140	126.9	5.26	1.171	1.121	1.148	1.14667	0.969	0.917	0.954	0.946667	0.92	0.901	0.899	0.906667	0.825581	0.000698241	0.957746	0.0763687	0.790698	0.000112931
F1Q1Q0	Coronin	31.0476	18	18	525	58.6	7.17	1.082	1.035	0.938	1.01833	0.956	0.979	0.993	0.976	1.02	0.994	1.002	1.00533	0.958429	0.387997	1.03005	0.0911601	0.987234	0.777909
E2R5C3	Uncharacterized protein	31.0345	3	3	87	10.7	10.21	0.896	0.932	0.951	0.926333	1.036	1.033	1.06	1.043	1.068	0.995	1.029	1.03067	1.12594	0.00307475	0.988175	0.616592	1.11263	0.0171069
P24643	Calnexin	31.0287	20	2	593	67.6	4.61	0.887	0.954	0.987	0.942667	0.981	0.979	1.039	0.999667	1.049	1.058	1.067	1.058	1.06047	0.182565	1.05835	0.0456274	1.12235	0.0181367
J9P5Y9	Uncharacterized protein	31.016	4	4	187	20.7	8.06	0.912	1.076	0.919	0.969	0.952	1.074	1.035	1.02033	1.006	1.006	1.021	1.011	1.05298	0.47068	0.990853	0.809873	1.04334	0.478394
E2RHV9	Uncharacterized protein	31.0078	4	4	129	13.7	8.51	0.923	0.919	0.905	0.915667	1.078	1.02	1.116	1.07133	1.005	1.025	1.008	1.01267	1.17	0.00542239	0.94524	0.10952	1.10593	0.000303629
E2RSV2	Uncharacterized protein	30.9783	10	10	368	41	7.83	1.02	0.982	0.999	1.00033	0.934	0.965	0.993	0.964	1.032	1.018	1.058	1.036	0.963679	0.147615	1.07469	0.025315	1.03565	0.0906091
E2QU52	Serine/threonine-protein phosphatase	30.9446	6	5	307	35.1	5.06	1.03	0.965	1.076	1.02367	1.073	0.848	0.985	0.968667	1	1.02	1.003	1.00767	0.946272	0.492855	1.04026	0.585037	0.98437	0.651176
E2R5R9	Uncharacterized protein	30.9055	14	14	508	56.9	8.35	0.993	1.035	0.96	0.996	0.965	1.022	0.985	0.990667	1.057	0.976	1.008	1.01367	0.994645	0.855062	1.02322	0.47027	1.01774	0.610584
E2R7L0	Uncharacterized protein	30.8989	8	8	356	40.5	8.24	1.046	0.915	1.015	0.992	1.283	0.949	1.032	1.088	0.901	0.929	0.93	0.92	1.09677	0.423899	0.845588	0.171074	0.927419	0.151248
F1PTR3	Uncharacterized protein	30.8824	14	14	612	67.8	7.93	0.986	1.016	0.923	0.975	1.009	0.969	1.073	1.017	1.034	0.999	0.991	1.008	1.04308	0.361934	0.99115	0.798802	1.03385	0.339004
E2R9G5	Guanine nucleotide-binding protein subunit gamma	30.8824	2	1	68	7.3	7.85	0.726	0.945	0.832	0.834333	1.106	1.404	1.432	1.314	0.915	0.844	0.797	0.852	1.57491	0.01707	0.648402	0.0136149	1.02117	0.818081
Q6URC2	High mobility group protein HMG-I/HMG-Y	30.8411	4	2	107	11.7	10.32	0.959	0.929	0.887	0.925	0.923	1.178	1.031	1.044	1.026	1.051	1.015	1.03067	1.12865	0.196157	0.987229	0.866946	1.11423	0.0107572
E2R0B5	Uncharacterized protein	30.8333	3	3	120	13.2	9.31	1.024	1.129	1.015	1.056	0.983	1.093	1.027	1.03433	0.916	0.873	0.939	0.909333	0.979482	0.678723	0.879149	0.0286838	0.861111	0.0239369
E2QXR8	Uncharacterized protein	30.8235	12	5	425	47.6	4.89	0.982	0.958	1.146	1.02867	1.013	0.895	1.03	0.979333	0.998	0.936	1.042	0.992	0.952041	0.534872	1.01293	0.82093	0.964355	0.611225
E2RCI3	Uncharacterized protein	30.8081	5	5	198	21.8	5.41	0.99	1.071	1.002	1.021	0.973	1.067	1.056	1.032	0.965	0.919	0.959	0.947667	1.01077	0.791653	0.918282	0.0629163	0.928175	0.0652121
F1Q1E1	Uncharacterized protein	30.7978	17	14	539	60.6	5.34	0.958	0.993	0.938	0.963	1.037	1.018	0.967	1.00733	1.027	1.029	1.033	1.02967	1.04604	0.167954	1.02217	0.34696	1.06923	0.0145761
F1PUE0	Uncharacterized protein	30.7792	25	25	770	91.2	9.32	0.975	0.925	1.014	0.971333	0.981	0.968	1.001	0.983333	1.025	1.061	1.05	1.04533	1.01235	0.684959	1.06305	0.0124042	1.07618	0.0566896
E2RQK5	Ribonuclease	30.7692	6	6	299	33.4	6.43	0.962	0.933	0.926	0.940333	1.129	1.051	1.178	1.11933	0.923	0.939	0.958	0.94	1.19036	0.00974149	0.839786	0.00946368	0.999646	0.98329
F1PV09	Uncharacterized protein	30.7568	18	18	621	68.5	8.51	0.976	0.97	1.011	0.985667	0.97	0.984	1.017	0.990333	1.037	1.007	1.028	1.024	1.00473	0.817216	1.034	0.111299	1.03889	0.0695492
E2RPI8	Clathrin light chain	30.7339	7	7	218	23.7	4.53	1.048	1.007	0.956	1.00367	0.99	0.924	0.995	0.969667	1.065	1.019	0.996	1.02667	0.966124	0.387488	1.05878	0.135737	1.02292	0.529618
O46880	MHC class I DLA-12	30.7263	7	0	358	39.8	6.37	1.244	1.433	1.3	1.32567	1.028	0.987	0.811	0.942	0.731	0.837	0.629	0.732333	0.710586	0.0116083	0.777424	0.0794764	0.552426	0.00194831
F1PBX0	Uncharacterized protein	30.687	14	14	655	71.5	7.52	0.961	0.895	0.895	0.917	1.152	1.02	0.986	1.05267	0.99	1.05	1.05	1.03	1.14795	0.0698639	0.978467	0.698489	1.12323	0.0190938
E2R3U9	Uncharacterized protein	30.6839	13	13	541	59.2	9.5	1.232	1.258	1.291	1.26033	0.911	0.944	0.844	0.899667	0.827	0.853	0.838	0.839333	0.713832	0.000447703	0.932938	0.11789	0.665961	2.28596e-05
F1PPR1	Uncharacterized protein	30.6569	5	5	137	15.8	8.07	1.048	0.986	0.999	1.011	1.128	1.038	0.989	1.05167	0.947	0.911	0.953	0.937	1.04022	0.416002	0.890967	0.05515	0.926805	0.0322983
J9NTT2	Acyl-CoA-binding protein	30.6569	3	3	137	15	9.04	0.925	0.903	1.012	0.946667	0.993	1.04	1.08	1.03767	1.019	1.087	0.942	1.016	1.09613	0.0945502	0.97912	0.680321	1.07324	0.26468
E2RIU2	Uncharacterized protein	30.6306	8	7	222	25.1	5.97	1.028	0.919	1.017	0.988	1.006	0.919	1.008	0.977667	1.051	1.013	1.041	1.035	0.989541	0.831111	1.05864	0.142534	1.04757	0.266916
E2RSB5	Uncharacterized protein	30.6193	19	19	872	98.2	5.4	1.02	1.008	1.075	1.03433	1.01	0.947	1.029	0.995333	0.992	0.956	0.962	0.97	0.962295	0.293032	0.974548	0.403884	0.937802	0.0516621
Q9GKK4	Galactokinase	30.6122	11	11	392	42.1	5.67	0.992	1.011	0.954	0.985667	1.033	1.022	0.971	1.00867	1.05	0.983	0.985	1.006	1.02333	0.416536	0.997356	0.931484	1.02063	0.503051
J9P334	Uncharacterized protein	30.597	13	13	536	61.5	9.51	1.083	1.091	1.067	1.08033	0.916	0.948	0.965	0.943	0.995	0.96	0.974	0.976333	0.872879	0.00101292	1.03535	0.131161	0.903733	0.0010983
E2QW27	Uncharacterized protein	30.5842	18	18	582	66.6	9.58	1.031	0.956	1.034	1.007	1.002	0.931	1.028	0.987	1.011	0.989	1.019	1.00633	0.980139	0.631857	1.01959	0.558679	0.999338	0.981515
F1PT95	Methylthioribulose-1-phosphate dehydratase	30.5785	5	5	242	27	6.92	0.94	0.899	1.017	0.952	1.149	0.907	1.156	1.07067	0.955	0.981	0.997	0.977667	1.12465	0.252686	0.913138	0.324047	1.02696	0.522744
J9P211	Uncharacterized protein	30.5699	6	6	193	22.3	5.35	0.848	1.05	0.923	0.940333	0.979	1.205	1.082	1.08867	1.011	0.949	0.954	0.971333	1.15775	0.167128	0.892223	0.160874	1.03297	0.644452
F6X5M3	Clathrin light chain	30.5677	9	9	229	25.1	4.64	0.906	0.919	0.884	0.903	1.021	1.017	1.041	1.02633	1.096	1.046	1.071	1.071	1.13658	0.000615592	1.04352	0.0512721	1.18605	0.00068496
E2QWR5	Uncharacterized protein	30.5668	15	15	494	56.3	7.01	1.078	1.049	1.035	1.054	1.016	1.092	0.968	1.02533	0.904	0.931	0.927	0.920667	0.972802	0.495306	0.897919	0.0476443	0.873498	0.000931765
J9P3T9	Uncharacterized protein	30.5439	7	7	239	27.4	5.26	0.948	0.962	0.944	0.951333	0.949	1.021	1.041	1.00367	1.043	1.058	1.035	1.04533	1.05501	0.139833	1.04151	0.220698	1.09881	0.000411223
E2QX86	Uncharacterized protein	30.5344	11	10	393	44.7	4.84	0.985	1.087	0.983	1.01833	1.029	1.103	1.024	1.052	0.942	0.94	0.907	0.929667	1.03306	0.475455	0.883714	0.0119017	0.91293	0.0703132
E2RC43	Uncharacterized protein	30.4843	10	10	351	38.8	6.09	1.034	1.043	1.018	1.03167	1.011	1.056	1.003	1.02333	0.95	0.96	0.924	0.944667	0.991922	0.668187	0.923127	0.0161609	0.91567	0.00258039
E2R2D2	Mitochondrial ribosomal protein S35	30.4615	9	9	325	36.9	8.75	1.012	1.017	0.94	0.989667	0.956	1.03	0.986	0.990667	1.017	1.025	1.017	1.01967	1.00101	0.977188	1.02927	0.251523	1.03031	0.296648
E2R7P6	Uncharacterized protein	30.3758	30	29	958	109	10.15	0.991	1.018	0.983	0.997333	0.99	0.97	1.042	1.00067	1.013	1.001	0.993	1.00233	1.00334	0.895941	1.00167	0.943838	1.00501	0.700137
J9PBD3	Uncharacterized protein	30.3738	5	5	214	24.5	10.23	0.941	1.064	0.989	0.998	0.979	0.86	0.928	0.922333	1.141	1.001	1.097	1.07967	0.924182	0.20248	1.17058	0.0430993	1.08183	0.209566
E2R3I8	Uncharacterized protein	30.3571	8	8	336	36.1	9.04	1.091	1.179	0.889	1.053	0.882	0.943	1.1	0.975	1.086	0.886	0.944	0.972	0.925926	0.508779	0.996923	0.974441	0.923077	0.481136
E2R1Z7	Uncharacterized protein	30.3551	22	22	873	97.8	4.59	1.027	1.008	1.033	1.02267	0.999	0.998	1.02	1.00567	0.964	0.969	0.982	0.971667	0.983377	0.177567	0.966192	0.0191688	0.95013	0.00528037
F1PVU1	Dolichyl-diphosphooligosaccharide--protein glycosyltransferase 48 kDa subunit	30.3297	11	11	455	50.5	6.42	0.915	1.005	0.974	0.964667	0.991	0.963	1.03	0.994667	1.034	1.061	1.027	1.04067	1.0311	0.41181	1.04625	0.10495	1.07878	0.0552319
E2R3R0	Uncharacterized protein	30.3279	3	3	122	13.1	8.32	0.851	0.926	0.933	0.903333	1.007	1.051	1.009	1.02233	1.047	1.09	1.085	1.074	1.13173	0.0164187	1.05054	0.0590547	1.18893	0.00446204
H9GW68	Uncharacterized protein	30.3258	18	12	798	90.6	6.19	0.984	0.972	0.989	0.981667	1.027	0.946	1.032	1.00167	1.003	1.024	1.023	1.01667	1.02037	0.519066	1.01498	0.628804	1.03565	0.0146311
J9P150	Uncharacterized protein	30.303	1	1	33	4	9.19	1.017	0.641	1.287	0.981667	1.077	0.552	0.961	0.863333	0.985	1.228	1.252	1.155	0.879457	0.655432	1.33784	0.181669	1.17657	0.447104
J9NXP8	Uncharacterized protein	30.2239	7	2	268	29	7.81	0.93	0.971	1.258	1.053	1.045	0.993	0.941	0.993	0.991	0.925	0.945	0.953667	0.94302	0.606383	0.960389	0.333833	0.905666	0.397761
E2RM35	Pyrroline-5-carboxylate reductase	30.2083	6	6	288	29.9	7.23	1.086	0.924	1.022	1.01067	0.993	0.912	1.002	0.969	0.98	1.038	1.043	1.02033	0.958773	0.491761	1.05298	0.216783	1.00956	0.85961
J9P5S7	Uncharacterized protein	30.1887	3	3	159	18.1	8.65	0.907	0.95	0.95	0.935667	1.055	1.139	1.03	1.07467	0.995	0.947	1.028	0.99	1.14856	0.0180433	0.921216	0.104732	1.05807	0.119771
F1PQA9	Uncharacterized protein	30.179	7	7	391	43.3	5.1	0.947	1.069	0.907	0.974333	0.913	1.057	1.097	1.02233	1.026	1.008	0.977	1.00367	1.04926	0.552599	0.981741	0.762421	1.03011	0.594451
E2RP71	Casein kinase II subunit beta	30.1695	7	7	295	33.7	5.95	0.989	0.897	1.152	1.01267	1.039	0.922	1.02	0.993667	0.944	1.049	0.99	0.994333	0.981238	0.829967	1.00067	0.98943	0.981896	0.831039
F1PFB4	Uncharacterized protein	30.1587	14	13	630	72.4	7.66	0.999	0.924	0.913	0.945333	1.129	0.982	1.121	1.07733	0.936	1.021	0.977	0.978	1.13963	0.0737982	0.907797	0.137823	1.03456	0.421418
E2RHZ0	Condensin complex subunit 1	30.1429	32	32	1400	157.2	6.61	0.837	0.868	0.86	0.855	1.263	1.138	1.236	1.21233	0.935	0.917	0.946	0.932667	1.41793	0.000795189	0.769315	0.00198397	1.09084	0.0034764
J9PA47	Uncharacterized protein	30.1248	19	17	561	63	6.18	1.114	1.061	1.022	1.06567	0.974	0.987	0.98	0.980333	0.964	0.935	0.964	0.954333	0.919925	0.0338759	0.973478	0.0662682	0.895527	0.0171624
F1PVC1	Uncharacterized protein	30.1205	10	1	332	37.4	6.19	0.734	0.928	1.134	0.932	0.506	0.435	1.35	0.763667	1.239	1.321	1.352	1.304	0.819385	0.622203	1.70755	0.141782	1.39914	0.0364998
E2QZR6	Uncharacterized protein	30.073	14	14	685	75.7	6.47	0.977	1.006	0.972	0.985	0.997	1.047	1.016	1.02	0.991	0.995	0.999	0.995	1.03553	0.124028	0.97549	0.165416	1.01015	0.408763
E2RHJ7	Uncharacterized protein	30.0654	10	9	459	47.8	4.83	1.015	0.914	0.996	0.975	1.049	0.885	1.033	0.989	1.043	1.012	1.054	1.03633	1.01436	0.828936	1.04786	0.427842	1.06291	0.14058
F1PKI0	Uncharacterized protein	30.0601	12	12	499	55.4	5.78	1.059	1.036	1.024	1.03967	0.96	0.944	0.983	0.962333	1.002	1.001	0.991	0.998	0.925617	0.0071793	1.03706	0.0395655	0.959923	0.0184699
F1PVD9	Uncharacterized protein	30.0493	4	4	203	22.6	9.52	0.949	0.984	0.978	0.970333	1.036	1.079	0.969	1.028	1.042	0.969	0.994	1.00167	1.05943	0.162992	0.974384	0.531668	1.03229	0.261575
E2RLJ3	Uncharacterized protein	30.0469	5	5	213	23.3	8.43	1.032	1.082	0.869	0.994333	0.943	1.028	1.009	0.993333	1.044	0.987	1.004	1.01167	0.998994	0.989174	1.01846	0.583772	1.01743	0.807201
F1PKG4	Uncharacterized protein	30.0448	5	5	223	25.6	8.07	0.987	1.021	0.933	0.980333	1.063	1.066	0.986	1.03833	1.02	0.977	0.947	0.981333	1.05916	0.188517	0.945104	0.165808	1.00102	0.977444
F1PIX5	Uncharacterized protein	30.0221	11	10	453	51.5	5.01	0.992	0.919	1.023	0.978	1.031	0.898	1.057	0.995333	1.042	0.993	1.045	1.02667	1.01772	0.780286	1.03148	0.579621	1.04976	0.238247
J9NXZ3	Uncharacterized protein	30	2	2	100	10.6	5.36	1.459	0.977	0.972	1.136	0.719	0.872	1.131	0.907333	0.988	0.96	0.923	0.957	0.798709	0.319525	1.05474	0.704104	0.84243	0.33275
J9NSE0	Uncharacterized protein	30	5	5	200	22.5	5.92	1.08	1.063	1.051	1.06467	0.935	1.176	0.987	1.03267	0.883	0.951	0.874	0.902667	0.969944	0.686557	0.874112	0.167268	0.84784	0.0032475
F1PU58	Uncharacterized protein	30	22	22	750	87	8.1	1.055	1.028	1.021	1.03467	0.969	0.969	1.007	0.981667	0.992	0.977	0.981	0.983333	0.948776	0.0317292	1.0017	0.907271	0.950387	0.0104559
E2R607	Uncharacterized protein	30	7	7	260	30.2	5.71	1.018	1.014	0.986	1.006	1.017	1.068	1.047	1.044	0.94	0.96	0.95	0.95	1.03777	0.100982	0.909962	0.00408433	0.944334	0.00848792
F1P9P5	Ubiquitinyl hydrolase 1	29.9539	22	22	868	96.3	5.11	1.033	1.025	0.983	1.01367	1.032	0.982	0.968	0.994	1.005	0.987	0.986	0.992667	0.980598	0.473072	0.998659	0.950982	0.979283	0.276742
J9NSL9	Uncharacterized protein	29.9419	19	19	688	77.3	9.5	1.119	1.116	1.036	1.09033	0.906	1.004	0.965	0.958333	0.985	0.929	0.94	0.951333	0.878936	0.0285009	0.992696	0.8435	0.872516	0.0123846
E2QXU5	Uncharacterized protein	29.9401	14	13	501	58.9	5.38	0.995	0.976	1.04	1.00367	1.027	0.963	1.004	0.998	0.987	1.01	0.999	0.998667	0.994354	0.842034	1.00067	0.97483	0.995018	0.815847
J9P0Z6	Uncharacterized protein	29.932	4	4	147	16.8	4.74	1.029	1.056	0.968	1.01767	1.023	1.086	1.044	1.051	0.928	0.952	0.913	0.931	1.03275	0.355637	0.885823	0.00524692	0.914838	0.0379591
E2R118	Uncharacterized protein	29.927	5	5	137	15.6	11.53	0.866	0.994	1.019	0.959667	0.98	0.992	0.968	0.98	1.065	1.063	1.053	1.06033	1.02119	0.692981	1.08197	0.000516431	1.1049	0.101582
E2QW54	Uncharacterized protein	29.9213	21	21	762	85	6.79	1.033	1.042	1.048	1.041	0.994	1.033	0.94	0.989	0.946	0.981	0.982	0.969667	0.950048	0.129661	0.980452	0.547321	0.931476	0.00481802
E2RM92	Uncharacterized protein	29.902	11	11	612	68.4	5.29	1.003	1.086	1.047	1.04533	0.963	0.929	0.999	0.963667	1.015	0.97	0.989	0.991333	0.921875	0.0597666	1.02871	0.314138	0.948342	0.118998
E2R222	Pachytene checkpoint protein 2 homolog	29.8611	12	12	432	48.4	6.21	0.957	0.963	0.932	0.950667	1.013	1.11	1.025	1.04933	0.985	1.032	0.982	0.999667	1.10379	0.0367163	0.952668	0.224023	1.05154	0.0593648
J9NU71	Uncharacterized protein	29.8507	9	2	335	37.1	7.49	1.033	0.978	0.987	0.999333	1.008	0.881	1.034	0.974333	1.053	1.015	1.009	1.02567	0.974983	0.644881	1.05269	0.355974	1.02635	0.295627
E2RT07	Uncharacterized protein	29.8507	4	4	134	15.6	10.04	0.968	0.904	1.135	1.00233	1.115	0.732	1.036	0.961	1.022	1.04	1.047	1.03633	0.958763	0.775615	1.07839	0.554673	1.03392	0.649206
P51152	Ras-related protein Rab-12 (Fragment)	29.8077	6	5	208	23.8	6.13	0.994	0.971	0.958	0.974333	1.081	1.016	1.026	1.041	0.978	0.994	0.983	0.985	1.06842	0.0429838	0.946206	0.0541802	1.01095	0.407536
J9P9X2	Uncharacterized protein	29.7794	5	1	272	29.8	5.26	0.808	0.933	0.982	0.907667	1.177	1.011	1.107	1.09833	0.946	0.966	1.069	0.993667	1.21006	0.0542727	0.904704	0.16334	1.09475	0.252102
J9P4R8	40S ribosomal protein S26	29.7521	3	3	121	13.8	10.83	0.936	0.959	0.971	0.955333	0.935	0.988	1.017	0.98	1.031	1.111	1.053	1.065	1.02582	0.398308	1.08673	0.0659694	1.11479	0.0134585
F6XHA7	Uncharacterized protein	29.7297	4	4	185	19.7	9.89	0.883	0.895	0.878	0.885333	1.056	1.107	1.154	1.10567	1.066	0.976	0.986	1.00933	1.24887	0.001557	0.912873	0.0744019	1.14006	0.0127744
F1P926	Uncharacterized protein	29.6912	12	12	421	48.1	7.34	1.065	1.022	0.918	1.00167	1.202	0.836	0.996	1.01133	0.977	1.019	0.966	0.987333	1.00965	0.936813	0.976269	0.833754	0.985691	0.773415
F1P8Q0	Uncharacterized protein	29.6844	22	22	1014	112.5	6	1.091	1.108	1.109	1.10267	0.977	0.953	1	0.976667	0.88	0.929	0.952	0.920333	0.885732	0.00103677	0.942321	0.0890441	0.834643	0.00116113
E2RSA9	Uncharacterized protein	29.6804	6	6	219	24.3	6.21	1.068	1.006	1.016	1.03	0.981	0.941	1.025	0.982333	1.019	0.989	0.955	0.987667	0.953722	0.198351	1.00543	0.869679	0.9589	0.187592
J9NZN7	Uncharacterized protein	29.6703	4	4	182	20.2	4.74	0.983	0.969	0.993	0.981667	1.052	0.998	1.009	1.01967	1.046	0.975	0.974	0.998333	1.03871	0.100815	0.979078	0.502415	1.01698	0.538852
E2QZ69	Uncharacterized protein	29.666	15	13	509	57.3	5.54	1.038	1.026	1.003	1.02233	0.953	0.988	0.987	0.976	1.018	1	0.988	1.002	0.954679	0.0397555	1.02664	0.146012	0.980111	0.205675
E2RIP1	Uncharacterized protein	29.6512	4	4	172	18.3	9.03	0.997	1.026	0.921	0.981333	0.975	1.129	0.974	1.026	0.982	1.025	0.971	0.992667	1.04552	0.499774	0.967511	0.570944	1.01155	0.764736
F1PFI7	Uncharacterized protein	29.6053	4	4	152	17.3	9.76	1.038	1.021	0.922	0.993667	0.839	0.966	1.085	0.963333	1.098	1.003	1.029	1.04333	0.969473	0.72287	1.08304	0.354558	1.04998	0.340579
E2RS49	Uncharacterized protein	29.6	5	5	125	13.7	10.11	0.975	0.977	0.912	0.954667	1.039	1.004	1.009	1.01733	1.027	1.054	1.003	1.028	1.06564	0.0591936	1.01048	0.59208	1.07682	0.0474431
E2RKG3	Uncharacterized protein	29.6	18	18	625	69.3	8.32	0.967	0.925	1.014	0.968667	1.058	0.957	1.024	1.013	1.004	1.025	1.026	1.01833	1.04577	0.321904	1.00526	0.869787	1.05127	0.136235
F1Q0K5	Uncharacterized protein	29.5848	13	13	578	59.4	6.99	0.972	1.01	0.937	0.973	1.003	1.041	0.998	1.014	1.039	1.002	0.997	1.01267	1.04214	0.177345	0.998685	0.947333	1.04077	0.186306
E2RES8	Uncharacterized protein	29.5739	9	9	399	43.8	5.83	1.058	1.087	0.974	1.03967	1.008	1.003	0.952	0.987667	0.984	0.962	0.972	0.972667	0.949984	0.246281	0.984813	0.473745	0.935556	0.123891
F1PDI8	Uncharacterized protein	29.5669	12	10	531	58.5	8.28	0.927	1.001	0.945	0.957667	1.023	1.013	0.976	1.004	1.065	1.02	1.031	1.03867	1.04838	0.154969	1.03453	0.153139	1.08458	0.035995
E2RST6	Uncharacterized protein	29.5547	6	6	247	27.5	8.28	1.218	1.198	1.319	1.245	0.861	0.853	0.838	0.850667	0.792	0.991	0.931	0.904667	0.683266	0.000489344	1.06348	0.414151	0.72664	0.00819619
E2R7V2	Uncharacterized protein	29.5455	8	8	264	29.4	5.96	1.023	0.948	1.026	0.999	1.028	1.008	1.028	1.02133	0.948	1.023	0.969	0.98	1.02236	0.444756	0.95953	0.150901	0.980981	0.605183
E2RR45	Uncharacterized protein	29.5455	4	4	176	19.4	4.75	0.992	0.941	0.972	0.968333	1.008	1.055	0.993	1.01867	1.022	1.019	0.998	1.013	1.05198	0.102457	0.994437	0.792426	1.04613	0.055044
E2RJN1	Uncharacterized protein	29.5238	8	8	420	47.1	6.73	1.041	1.034	0.972	1.01567	0.989	0.91	1.017	0.972	0.998	1.037	1.002	1.01233	0.957007	0.3236	1.0415	0.305429	0.996718	0.90109
Q2KM13	Eukaryotic translation initiation factor 2-alpha kinase 2	29.5113	11	11	532	60.5	8.68	1.016	1.044	1.044	1.03467	0.979	0.935	0.974	0.962667	1.049	0.974	0.984	1.00233	0.930412	0.01266	1.0412	0.22012	0.96875	0.270312
F1Q1Z8	Tyrosine-protein phosphatase non-receptor type	29.5082	11	11	427	49	6.19	0.954	0.955	0.937	0.948667	1.059	1.037	0.993	1.02967	1.013	1.039	1.013	1.02167	1.08538	0.0161624	0.99223	0.725683	1.07695	0.0022098
F6V7P2	Electron transfer flavoprotein-ubiquinone oxidoreductase, mitochondrial	29.4976	16	16	617	68.6	7.68	0.947	0.975	0.923	0.948333	0.996	1.003	1.069	1.02267	1.062	1.02	1.005	1.029	1.07838	0.0549539	1.00619	0.836935	1.08506	0.0238311
F1PSC3	Uncharacterized protein	29.4931	6	6	217	25.1	6.14	0.924	1.011	1.04	0.991667	0.946	1.06	1.043	1.01633	1.008	0.948	1.02	0.992	1.02487	0.646064	0.976058	0.592677	1.00034	0.993956
E2RHX2	Uncharacterized protein	29.434	6	6	265	30.6	6.33	0.96	0.979	0.968	0.969	1.001	1.072	0.998	1.02367	1.007	1.008	1.007	1.00733	1.05642	0.0922227	0.984044	0.536473	1.03956	0.00225494
E2R4I0	Uncharacterized protein	29.429	15	15	683	77.5	9.5	1.029	1.043	0.852	0.974667	1.071	1.001	1.056	1.04267	0.969	1.006	0.975	0.983333	1.06977	0.354839	0.943095	0.070085	1.00889	0.896458
E2RH71	Uncharacterized protein	29.3893	13	12	524	56.5	6.29	0.96	0.93	0.955	0.948333	1.012	1.065	1.032	1.03633	1.014	1.014	1.017	1.015	1.09279	0.0081477	0.979415	0.240354	1.0703	0.0020321
F1PWC7	Uncharacterized protein	29.3671	9	9	395	43.4	7.36	1.063	1.014	1.012	1.02967	1.009	1.044	0.963	1.00533	0.917	1	0.979	0.965333	0.976368	0.445428	0.960212	0.307328	0.93752	0.0984479
F1PUP7	Uncharacterized protein	29.3671	18	18	790	91.8	6.43	1.032	0.988	0.981	1.00033	0.927	0.972	0.993	0.964	1.014	1.042	1.05	1.03533	0.963679	0.222435	1.074	0.0330213	1.03499	0.144535
F1PXY4	Uncharacterized protein	29.3629	10	10	361	39.8	9.36	1.001	0.844	1.103	0.982667	1.056	0.802	1.027	0.961667	1.019	1.071	1.077	1.05567	0.97863	0.857996	1.09775	0.317401	1.07429	0.399807
F1PY28	Branched-chain-amino-acid aminotransferase	29.3506	11	11	385	42.9	5.33	1.004	0.974	1.036	1.00467	1.065	1.002	0.983	1.01667	0.959	0.993	0.984	0.978667	1.01194	0.714682	0.962623	0.229013	0.974121	0.275248
F1P992	Uncharacterized protein	29.3296	10	10	358	39.5	8.02	1.163	1.065	1.067	1.09833	1.025	0.995	0.944	0.988	0.842	0.963	0.937	0.914	0.899545	0.051152	0.925101	0.16578	0.83217	0.0197036
F1PFJ0	Uncharacterized protein	29.3144	11	9	423	48.1	8.57	1.078	1.03	1.012	1.04	1.104	0.967	0.961	1.01067	0.983	0.939	0.926	0.949333	0.971795	0.593777	0.939314	0.285405	0.912821	0.0257456
Q1HG70	Dual specificity mitogen-activated protein kinase kinase 2	29.25	10	5	400	44.4	6.86	0.977	1.064	0.923	0.988	1.02	1.046	0.998	1.02133	0.997	0.983	0.992	0.990667	1.03374	0.484843	0.969974	0.101327	1.0027	0.951589
E2QUT9	Uncharacterized protein	29.2453	8	8	318	35.6	8.02	1.045	0.97	0.936	0.983667	0.982	1.013	1.033	1.00933	0.998	1.001	1.023	1.00733	1.02609	0.509159	0.998018	0.910974	1.02406	0.514712
J9P7W8	Uncharacterized protein	29.2419	7	7	277	30.2	5.27	1.035	0.966	0.998	0.999667	1.077	0.942	1.043	1.02067	0.982	0.963	0.994	0.979667	1.02101	0.666218	0.95983	0.379433	0.979993	0.41246
F1PUA2	Acetyl-coenzyme A synthetase	29.2343	19	19	862	93.8	9.35	0.911	0.995	0.926	0.944	0.962	1.014	1.019	0.998333	1.097	1.024	1.052	1.05767	1.05756	0.161074	1.05943	0.101485	1.12041	0.0274094
F6V2H2	Uncharacterized protein	29.1899	17	17	716	79.1	9	0.917	1.013	0.914	0.948	1.029	1.013	1.03	1.024	1.059	1.011	1.015	1.02833	1.08017	0.0825029	1.00423	0.803885	1.08474	0.0892451
F1P7D3	Uncharacterized protein	29.1845	5	5	233	26.1	5.02	0.979	0.97	0.96	0.969667	1.157	1.058	1.054	1.08967	0.915	0.952	0.955	0.940667	1.12375	0.0245403	0.863261	0.0144684	0.970093	0.106772
E2R8C6	Uncharacterized protein	29.1796	25	25	963	107.7	4.94	0.978	0.948	0.966	0.964	1.046	0.96	1.021	1.009	1.028	1.027	1.026	1.027	1.04668	0.170756	1.01784	0.519935	1.06535	0.00196105
E2RHV6	Uncharacterized protein	29.1777	10	10	377	42.9	6.55	1.017	1.034	1.027	1.026	1.024	1.027	0.943	0.998	0.965	0.973	0.99	0.976	0.97271	0.37317	0.977956	0.482998	0.951267	0.00487336
E2QYJ3	Uncharacterized protein	29.1747	14	12	521	58.8	5.15	0.974	1.005	0.97	0.983	1	1.026	1.03	1.01867	1.026	0.985	0.985	0.998667	1.03628	0.06994	0.980366	0.294425	1.01594	0.42324
E2RSY6	Uncharacterized protein	29.1667	4	4	192	21.3	5.73	1.002	1.021	1	1.00767	1.074	1.004	1.019	1.03233	0.983	0.947	0.95	0.96	1.02448	0.330831	0.929932	0.0403928	0.952696	0.0232714
P28490	Calreticulin (Fragment)	29.1667	1	1	24	2.9	5.02	0.981	0.915	1.014	0.97	0.998	0.927	0.976	0.967	0.984	1.104	1.101	1.063	0.996907	0.937381	1.09928	0.0984324	1.09588	0.130962
E2R9I1	Polyadenylate-binding protein	29.1429	19	1	700	76.8	9.63	1.063	1.018	0.993	1.02467	1.034	0.776	1.007	0.939	0.956	1.095	1.057	1.036	0.916396	0.367478	1.1033	0.350166	1.01106	0.818509
E2R0S7	Uncharacterized protein	29.1105	10	6	371	43.7	9.92	0.985	0.996	1.056	1.01233	0.953	0.916	0.971	0.946667	1.058	1.012	1.053	1.041	0.935133	0.0743897	1.09965	0.0123415	1.02832	0.33926
J9NVA0	Uncharacterized protein	29.0909	8	6	385	42.5	8.54	1.006	1.004	1.005	1.005	1.017	0.927	1.034	0.992667	1.039	0.934	1.033	1.002	0.987728	0.72914	1.0094	0.85396	0.997015	0.934025
J9P357	Uncharacterized protein	29.0837	37	1	1255	136.8	5.78	1.473	1.302	1.309	1.36133	0.904	0.824	0.783	0.837	0.842	0.7	0.863	0.801667	0.614838	0.00137596	0.957786	0.601009	0.588883	0.00179183
E2QTS3	Uncharacterized protein	29.0816	12	8	392	46.5	10.07	1.035	0.978	1.046	1.01967	0.94	0.902	1.015	0.952333	1.042	1.032	1.01	1.028	0.933965	0.161993	1.07945	0.0934689	1.00817	0.736492
F1PNW3	Uncharacterized protein	29.078	4	3	141	16.3	4.98	0.994	0.965	0.897	0.952	0.968	1.096	0.963	1.009	0.883	1.185	1.05	1.03933	1.05987	0.335887	1.03006	0.77145	1.09174	0.396009
E2RGF2	Uncharacterized protein	29.0735	9	9	313	35.1	7.69	1.067	1.098	0.998	1.05433	1.06	0.996	0.975	1.01033	0.948	0.915	0.945	0.936	0.958267	0.323139	0.926427	0.054743	0.887765	0.0195794
J9NZ45	Uncharacterized protein	29.0541	4	4	148	16.9	4.64	0.9	0.949	0.968	0.939	1.123	1.056	0.913	1.03067	0.974	1.057	1.061	1.03067	1.09762	0.232226	1	1	1.09762	0.0581615
F1PF85	Uncharacterized protein	29.0476	6	6	210	23	11.02	0.968	0.947	0.996	0.970333	0.916	0.949	0.985	0.95	1.061	1.104	1.075	1.08	0.979045	0.452607	1.13684	0.00530501	1.11302	0.00449057
E2QRU5	Uncharacterized protein	29.0323	5	5	155	17.6	10.07	0.955	1.027	0.928	0.97	1.046	0.972	1.066	1.028	1.085	0.915	1.006	1.002	1.05979	0.231152	0.974708	0.671056	1.03299	0.606418
E2RC02	Uncharacterized protein	29	9	9	300	34.1	6.86	0.977	0.97	0.953	0.966667	1.053	1.06	1.017	1.04333	0.989	1.011	0.971	0.990333	1.07931	0.00710601	0.949201	0.0397738	1.02448	0.156453
F1PWE6	Uncharacterized protein	28.9738	13	13	497	55.4	8.37	0.937	0.961	0.934	0.944	1.008	0.978	1.005	0.997	1.068	1.048	1.062	1.05933	1.05614	0.0143928	1.06252	0.00515461	1.12218	0.000375751
F1PVS6	Uncharacterized protein	28.9689	14	1	611	68.3	9.79	1.066	0.861	1.119	1.01533	0.981	0.962	1.16	1.03433	0.99	1.019	0.843	0.950667	1.01871	0.85971	0.919111	0.372242	0.93631	0.536234
E2RCX4	Structural maintenance of chromosomes protein	28.9596	35	35	1288	147	6.96	1.016	1.026	1.055	1.03233	0.96	1.032	0.973	0.988333	0.98	0.981	0.977	0.979333	0.957378	0.15386	0.990894	0.705754	0.94866	0.0107562
E2RPG3	Uncharacterized protein	28.9538	21	21	822	91.4	6.8	1.047	0.973	0.96	0.993333	1.016	0.94	0.977	0.977667	1.03	1.043	1.013	1.02867	0.984228	0.676448	1.05217	0.0967638	1.03557	0.28214
F1PIG2	UMP-CMP kinase	28.9474	6	6	228	25.8	8.32	0.998	0.969	1.027	0.998	1.006	0.949	1.034	0.996333	1.019	0.986	1.012	1.00567	0.99833	0.958493	1.00937	0.746539	1.00768	0.714557
E2RIG0	NADH dehydrogenase [ubiquinone] 1 alpha subcomplex subunit 10, mitochondrial	28.9398	9	9	349	39.8	6.9	0.95	0.947	0.942	0.946333	1.057	1.038	1.045	1.04667	0.995	1.02	1.006	1.007	1.10602	7.58532e-05	0.962102	0.0121469	1.06411	0.00133578
E2RCH6	Uncharacterized protein	28.9346	20	20	826	91	9.04	0.989	0.962	0.988	0.979667	0.961	1.002	1	0.987667	1.002	1.047	1.05	1.033	1.00817	0.64347	1.0459	0.09118	1.05444	0.0405149
F1P7R7	Uncharacterized protein	28.928	17	17	681	75.7	5.16	0.976	0.973	0.971	0.973333	1.044	0.989	0.947	0.993333	0.977	1.083	1.039	1.033	1.02055	0.516253	1.03993	0.394759	1.0613	0.124599
F1PQG3	Uncharacterized protein	28.9277	9	8	401	46.4	6.48	0.991	0.999	0.943	0.977667	0.933	1.002	1.004	0.979667	1.06	1.013	1.056	1.043	1.00205	0.948618	1.06465	0.0847183	1.06683	0.0472365
J9P9R6	Uncharacterized protein	28.91	5	5	211	23.1	7.33	1.086	1.001	0.987	1.02467	0.901	0.997	1.026	0.974667	1.066	0.946	0.991	1.001	0.951204	0.363664	1.02702	0.636025	0.976903	0.639034
F1PW22	Uncharacterized protein	28.9037	7	7	301	32.5	8.68	0.935	0.958	0.992	0.961667	1.069	1.031	1.045	1.04833	1.006	0.965	1	0.990333	1.09012	0.0121718	0.944674	0.0266262	1.02981	0.242424
F1PQD0	Elongation factor G, mitochondrial	28.8948	17	17	751	83.3	6.13	1.054	1.121	1.014	1.063	0.967	1.127	0.935	1.00967	0.909	0.922	0.952	0.927667	0.949828	0.471162	0.918785	0.248339	0.872687	0.0159371
E2RC10	Uncharacterized protein	28.8889	4	4	225	24.5	8.24	1.101	0.929	1.003	1.011	1.048	1.007	0.987	1.014	0.946	0.974	1.004	0.974667	1.00297	0.957535	0.96121	0.184398	0.964062	0.527365
E2R7W5	Uncharacterized protein (Fragment)	28.8889	4	4	180	21.1	9.77	0.913	1.029	0.994	0.978667	0.999	1.053	1.008	1.02	1.003	0.995	1.007	1.00167	1.04223	0.340094	0.982026	0.343334	1.0235	0.541841
E2QY01	U3 small nucleolar RNA-associated protein 11	28.8538	8	8	253	30.6	10.26	1.026	0.988	0.887	0.967	0.996	1.02	0.992	1.00267	1.01	1.059	1.022	1.03033	1.03688	0.447472	1.02759	0.181857	1.06549	0.223622
F1PWG0	Uncharacterized protein	28.8382	11	11	482	55.9	7.58	0.966	1.024	1.015	1.00167	0.974	1.019	0.967	0.986667	1.037	0.974	1.024	1.01167	0.985025	0.570369	1.02534	0.377045	1.00998	0.723456
E2RFE6	Uncharacterized protein	28.8136	2	2	59	7	10.45	1.56	1.208	1.631	1.46633	0.837	0.728	0.912	0.825667	0.684	0.745	0.695	0.708	0.563083	0.010537	0.857489	0.106239	0.482837	0.00456536
A0A0B4J195	Aspartate aminotransferase	28.8136	10	10	413	46.4	7.24	0.967	1.034	0.905	0.968667	0.98	1.107	0.995	1.02733	1.005	1.017	0.99	1.004	1.06056	0.343942	0.977287	0.598188	1.03648	0.405752
E2RK67	Uncharacterized protein	28.777	9	9	278	31.5	5.05	0.959	0.962	0.906	0.942333	1.05	1.056	1.015	1.04033	1.02	1.01	1.022	1.01733	1.104	0.0116165	0.977892	0.15911	1.07959	0.015598
E2R7T4	Structural maintenance of chromosomes protein	28.7592	31	31	1217	141.5	7.18	1.054	1.107	1.038	1.06633	1.016	1.047	1.02	1.02767	0.912	0.9	0.906	0.906	0.963739	0.1682	0.881609	0.000297732	0.849641	0.00162003
J9P492	Uncharacterized protein	28.75	6	6	240	27.9	8.81	1.018	0.942	1.031	0.997	0.95	0.931	1.032	0.971	1.02	1.047	1.029	1.032	0.973922	0.565867	1.06282	0.129211	1.03511	0.292057
E2RNC3	Uncharacterized protein	28.7356	23	22	870	98.2	7.43	1.035	1.022	1.005	1.02067	0.985	0.94	0.997	0.974	1.028	0.989	0.999	1.00533	0.954278	0.073936	1.03217	0.208604	0.984977	0.35193
F1PQM3	Uncharacterized protein	28.7206	8	8	383	42.9	6.99	0.868	1.083	0.865	0.938667	0.967	1.408	0.956	1.11033	0.993	0.921	0.939	0.951	1.18288	0.358044	0.8565	0.349239	1.01314	0.877911
P42929	Heat shock protein beta-1	28.7081	6	6	209	22.9	6.7	1.145	1.142	1.04	1.109	1.068	1.02	1.081	1.05633	0.891	0.792	0.819	0.834	0.95251	0.250056	0.789524	0.00310934	0.752029	0.00375907
J9NWM0	Secretory carrier-associated membrane protein	28.6982	6	6	338	37.9	7.42	1.065	1.022	0.979	1.022	0.872	0.961	0.992	0.941667	1.03	1.025	1.055	1.03667	0.921396	0.139882	1.10088	0.0627891	1.01435	0.609475
E2RQG8	Uncharacterized protein	28.6853	6	6	251	27.7	8.09	0.975	1	0.973	0.982667	1.082	0.983	1.007	1.024	0.998	0.977	1.005	0.993333	1.04206	0.254002	0.970052	0.378269	1.01085	0.427539
E2RGL7	Uncharacterized protein	28.6533	9	9	349	38.7	6	1.004	1.014	0.961	0.993	1.057	1.072	1.033	1.054	0.972	0.932	0.954	0.952667	1.06143	0.0370851	0.903858	0.00333914	0.959382	0.113311
E2RR79	Uncharacterized protein	28.6164	8	8	318	36.8	6.46	0.931	0.94	0.948	0.939667	1.057	1.07	1.011	1.046	1.002	1.045	0.996	1.01433	1.11316	0.00459499	0.969726	0.251295	1.07946	0.00994841
P33731	Signal recognition particle subunit SRP72	28.614	18	18	671	74.4	9.22	0.96	0.98	0.981	0.973667	0.96	1.066	0.992	1.006	1.033	1.025	1.003	1.02033	1.03321	0.371146	1.01425	0.6833	1.04793	0.0144072
J9NS22	Uncharacterized protein	28.5714	3	3	147	16.7	7.83	1.105	1.003	0.961	1.023	0.987	1.054	0.985	1.00867	0.96	0.991	0.955	0.968667	0.985989	0.781839	0.960344	0.189248	0.946888	0.286461
E2RJG0	Uncharacterized protein	28.5714	7	7	224	25.1	5.05	1.027	1.011	0.875	0.971	1.022	1.157	1.039	1.07267	0.952	0.963	0.955	0.956667	1.1047	0.188705	0.891858	0.0527462	0.985239	0.781569
F1PVE3	Uncharacterized protein	28.5714	5	5	210	23.6	7.17	0.988	0.983	0.98	0.983667	0.922	1.018	1.014	0.984667	1.06	0.997	1.039	1.032	1.00102	0.976151	1.04807	0.263513	1.04914	0.0607296
E2R3S9	Uncharacterized protein	28.5714	12	12	546	61.3	6.89	0.964	0.987	0.961	0.970667	1.046	1.03	1.018	1.03133	0.96	1.035	0.999	0.998	1.0625	0.0062712	0.967679	0.222911	1.02816	0.303336
J9P2I8	Uncharacterized protein	28.5714	8	7	238	27.4	11.84	0.929	1.004	0.951	0.961333	0.998	1.085	0.964	1.01567	1.002	1.026	1.04	1.02267	1.05652	0.268803	1.00689	0.861731	1.0638	0.0692376
J9P8T3	Uncharacterized protein	28.5714	1	1	63	7.1	8.7	0.824	0.959	0.949	0.910667	1.045	0.951	0.981	0.992333	1.092	1.099	1.101	1.09733	1.08968	0.188129	1.10581	0.0196121	1.20498	0.0127491
F1PRD0	Uncharacterized protein	28.5199	6	6	277	31.5	6.95	0.977	1.014	0.933	0.974667	1.042	1.084	1.031	1.05233	1.017	0.969	0.934	0.973333	1.07969	0.0523996	0.924929	0.0526337	0.998632	0.970221
E2RNR3	Uncharacterized protein	28.453	8	8	362	40.7	6.2	0.937	0.982	0.975	0.964667	0.991	1.028	1.063	1.02733	1.032	0.99	1.002	1.008	1.06496	0.0666555	0.981181	0.469969	1.04492	0.0818973
J9P4N2	Uncharacterized protein	28.4091	2	2	88	9.7	6.27	0.75	1.154	0.967	0.957	0.976	1.504	0.926	1.13533	0.907	0.922	0.894	0.907667	1.18635	0.460527	0.799472	0.286046	0.94845	0.694981
F1P808	Uncharacterized protein	28.3988	7	7	331	35.9	9.86	0.913	1.054	0.963	0.976667	0.938	0.984	1.009	0.977	1.058	1.035	1.046	1.04633	1.00034	0.99459	1.07097	0.0336507	1.07133	0.170939
J9P3N0	Uncharacterized protein	28.3951	2	2	81	8.4	4.78	0.997	1	0.928	0.975	0.945	1.001	1.011	0.985667	1.074	1.017	1.027	1.03933	1.01094	0.749811	1.05445	0.118051	1.06598	0.093537
F1Q4B4	Uncharacterized protein	28.3951	4	4	162	19	5.6	0.832	0.888	0.987	0.902333	1.582	1.072	0.961	1.205	0.897	0.895	0.887	0.893	1.33543	0.198336	0.741079	0.178109	0.989656	0.847217
B1H0W0	Cation-independent mannose-6-phosphate/insulin-like growth factor 2 receptor protein	28.3941	54	54	2497	274.4	5.76	1.08	1.118	1.038	1.07867	0.882	0.977	0.97	0.943	0.993	0.956	0.986	0.978333	0.874227	0.0239975	1.03747	0.339466	0.906984	0.0175722
F1PK90	Uncharacterized protein	28.3915	28	27	1032	117.4	9.29	1.046	1	1.068	1.038	0.883	0.975	1.038	0.965333	1.031	1.008	0.951	0.996667	0.929994	0.214213	1.03246	0.571474	0.96018	0.254484
E2RDZ6	NAD-dependent protein deacylase sirtuin-5, mitochondrial	28.3871	6	6	310	33.9	8.28	1.002	1.005	0.991	0.999333	1.001	0.993	1.058	1.01733	0.999	1.001	0.95	0.983333	1.01801	0.437708	0.966579	0.267224	0.983989	0.405184
E2R2J0	Uncharacterized protein	28.352	17	17	716	81	6.34	0.9	0.89	0.897	0.895667	1.173	1.108	1.118	1.133	0.936	1.001	0.976	0.971	1.26498	0.000313385	0.857017	0.00425722	1.08411	0.0170775
E2RSI0	Uncharacterized protein	28.3133	3	3	166	19.1	9.45	0.874	1.093	0.887	0.951333	1.005	1.175	0.982	1.054	0.997	0.978	1.008	0.994333	1.10792	0.333686	0.94339	0.386826	1.0452	0.579853
F1PZB0	Uncharacterized protein	28.3054	14	14	537	60	7.42	0.966	0.974	0.97	0.97	0.969	0.96	1.035	0.988	1.032	1.041	1.053	1.042	1.01856	0.49081	1.05466	0.0914298	1.07423	0.000379232
A0A0A0MPC9	Dynein light chain Tctex-type 3	28.2759	2	2	145	16	7.74	1.112	1.082	0.93	1.04133	0.825	0.989	1.104	0.972667	0.992	1.046	0.918	0.985333	0.934059	0.524622	1.01302	0.893766	0.946223	0.453113
F1Q065	Uncharacterized protein	28.269	16	10	803	88.6	7.11	0.971	0.965	0.94	0.958667	1.037	1.074	1.044	1.05167	0.963	1.008	0.997	0.989333	1.09701	0.00327136	0.940729	0.0242814	1.03199	0.137328
F1PA04	Uncharacterized protein	28.2609	6	6	184	21.8	8.47	1.067	0.979	1.11	1.052	1.089	0.924	1.012	1.00833	0.941	0.952	0.925	0.939333	0.958492	0.515638	0.93157	0.226379	0.892902	0.0457542
E2RPZ9	Glycylpeptide N-tetradecanoyltransferase	28.2258	11	11	496	56.7	8.16	0.97	0.988	0.999	0.985667	1.006	1.084	0.994	1.028	0.984	0.986	0.988	0.986	1.04295	0.223989	0.959144	0.211119	1.00034	0.970704
F1PRD1	Uncharacterized protein	28.2192	10	10	365	41.2	10.74	0.919	0.949	0.971	0.946333	0.975	1.047	1.005	1.009	0.976	1.095	1.064	1.045	1.06622	0.0717043	1.03568	0.432663	1.10426	0.0633232
E2RN03	Uncharacterized protein	28.2158	11	11	482	53.5	9	0.977	0.985	0.98	0.980667	1.024	1.103	0.961	1.02933	0.951	1.007	1.012	0.99	1.04963	0.302383	0.961788	0.436043	1.00952	0.660238
E2QYU2	Clusterin	28.1879	11	11	447	51.9	6.05	1.682	1.912	1.767	1.787	0.639	0.639	0.572	0.616667	0.611	0.6	0.578	0.596333	0.345085	7.82666e-05	0.967027	0.450653	0.333706	6.18908e-05
A0A0A0MPD6	Histone-lysine N-methyltransferase	28.1834	14	14	589	66.4	6.15	1	0.983	1.003	0.995333	0.97	0.977	1.008	0.985	1.017	1.03	1.013	1.02	0.989618	0.478504	1.03553	0.0516807	1.02478	0.0377722
F1PZ83	Uncharacterized protein	28.1532	10	10	444	50.6	7.05	0.977	1	0.978	0.985	1.004	0.984	0.968	0.985333	1.035	0.999	1.056	1.03	1.00034	0.980527	1.04533	0.0852452	1.04569	0.0693365
F1P9A3	Ferrochelatase	28.1324	9	9	423	47.4	8.79	0.943	0.961	0.98	0.961333	1.023	0.997	1.012	1.01067	1.061	1.004	1.019	1.028	1.05132	0.0195395	1.01715	0.405262	1.06935	0.0295924
F1PXL3	Uncharacterized protein	28.125	2	2	128	14.9	9.82	0.801	0.92	0.867	0.862667	1.152	1.183	1.132	1.15567	0.999	0.954	0.992	0.981667	1.33964	0.00144547	0.849438	0.00103391	1.13794	0.0328033
E2RFA3	RNA helicase	28.1016	16	16	669	75.1	9.44	0.908	0.956	0.945	0.936333	0.998	1.106	0.976	1.02667	0.984	1.065	1.062	1.037	1.09648	0.101937	1.01006	0.840515	1.10751	0.0291013
L7N050	Uncharacterized protein	28.0811	14	1	641	70.5	6.29	1.436	1.008	0.788	1.07733	0.592	0.8	1.14	0.844	1.108	1.062	1.065	1.07833	0.783416	0.400739	1.27765	0.217844	1.00093	0.99607
J9NUL3	Uncharacterized protein	28.0591	9	8	474	55	6.7	1.04	0.984	1.019	1.01433	0.929	0.907	1.041	0.959	1.039	1.014	1.026	1.02633	0.945449	0.28242	1.07021	0.185089	1.01183	0.538409
E2RPW8	Uncharacterized protein	28.0553	25	25	941	106.7	7.99	1.034	0.975	1.021	1.01	1.062	0.993	1.053	1.036	0.964	0.942	0.957	0.954333	1.02574	0.407121	0.921171	0.02251	0.944884	0.0430718
F1PLS0	Uncharacterized protein	28.0315	15	15	635	71.7	6.27	0.946	1.02	0.993	0.986333	0.988	1.044	0.985	1.00567	1.019	0.999	1.005	1.00767	1.0196	0.540221	1.00199	0.925454	1.02163	0.395174
F1PM51	Uncharacterized protein	28.0255	9	9	314	35.3	5.82	1.116	1.131	1.148	1.13167	1.065	1.029	0.945	1.013	0.791	0.908	0.866	0.855	0.89514	0.0319646	0.844028	0.0328413	0.755523	0.00145385
F1PVI2	Uncharacterized protein	28.0255	10	10	471	51.9	6.92	0.999	0.997	0.998	0.998	1.052	0.93	0.992	0.991333	1.038	0.995	0.999	1.01067	0.99332	0.859103	1.0195	0.635934	1.01269	0.408373
E2R6Q7	Uncharacterized protein	28.0236	8	8	339	37.7	6.07	1.119	0.978	1.164	1.087	0.981	0.783	0.998	0.920667	1.015	0.953	1.01	0.992667	0.846979	0.134634	1.0782	0.372803	0.913217	0.187761
E2R8W5	Uncharacterized protein	28.022	12	12	546	59.9	9.41	1.021	1.026	0.975	1.00733	1.048	1.028	0.999	1.025	0.982	0.952	0.968	0.967333	1.01754	0.458985	0.94374	0.0257689	0.960291	0.09539
E2RSJ3	Uncharacterized protein	28.013	11	11	614	65.7	7.46	1.004	0.956	1.003	0.987667	1.079	1.014	0.996	1.02967	0.947	1	1.002	0.983	1.04252	0.231119	0.954678	0.206449	0.995275	0.855194
F1P7L9	Uncharacterized protein	27.9783	26	26	1108	127.1	9.04	1.004	0.983	0.994	0.993667	1.006	1.015	1.039	1.02	1.019	0.973	0.967	0.986333	1.0265	0.0850919	0.966993	0.15359	0.99262	0.696847
E2RH14	Uncharacterized protein	27.9669	25	25	1087	123.9	6.28	1.014	0.984	0.946	0.981333	0.994	0.99	1.018	1.00067	1.023	1.016	1.015	1.018	1.0197	0.419972	1.01732	0.12947	1.03736	0.138223
F1PT38	Uncharacterized protein	27.9661	3	3	118	13.2	8.91	1.011	1.009	1.042	1.02067	0.99	0.986	0.939	0.971667	0.943	1.133	0.946	1.00733	0.951992	0.0663167	1.03671	0.612058	0.986937	0.844529
Q863Z4	Myotrophin	27.9661	3	3	118	12.9	5.52	0.974	0.909	1.077	0.986667	1.1	0.945	1.022	1.02233	0.99	0.98	1.004	0.991333	1.03615	0.619085	0.969677	0.531214	1.00473	0.929284
J9P4C5	Uncharacterized protein	27.9621	6	6	211	23.7	6.57	0.945	0.966	0.91	0.940333	1.013	1.131	0.981	1.04167	1.017	1.011	1.026	1.018	1.10776	0.104643	0.97728	0.632736	1.08259	0.010074
J9P097	Uncharacterized protein	27.957	5	5	279	30.5	5.74	0.992	1.02	0.923	0.978333	1.032	1.1	1.024	1.052	0.916	1.05	0.943	0.969667	1.0753	0.121504	0.921736	0.158008	0.991141	0.870932
F1Q0Q9	Uncharacterized protein	27.9446	14	1	433	48.1	5.06	0.811	0.838	0.729	0.792667	1.134	1.059	1.043	1.07867	0.996	1.127	1.262	1.12833	1.36081	0.00268516	1.04604	0.576306	1.42347	0.0158598
E2RB34	Uncharacterized protein	27.9412	25	24	1156	129.1	5.02	0.989	1.009	1.007	1.00167	0.993	0.989	0.995	0.992333	0.99	1.01	1.019	1.00633	0.990682	0.2302	1.01411	0.184833	1.00466	0.684477
F6Y1U6	Alkylglycerone-phosphate synthase	27.9035	13	13	663	73.2	7.65	0.946	0.912	1.034	0.964	1.006	1.001	0.998	1.00167	1.035	1.008	1.059	1.034	1.03907	0.359514	1.03228	0.0960353	1.07261	0.148861
P06625	Signal recognition particle receptor subunit alpha	27.8997	15	1	638	69.6	8.88	0.982	1.039	0.856	0.959	0.936	1.064	0.998	0.999333	1.054	1.001	1.069	1.04133	1.04206	0.571291	1.04203	0.377188	1.08585	0.227865
E2QYQ7	Signal peptidase complex subunit 2	27.8761	5	5	226	26.4	6.8	1.18	1.063	1.135	1.126	1.008	1.146	1.023	1.059	0.807	0.83	0.808	0.815	0.940497	0.293297	0.769594	0.00532423	0.723801	0.000875668
E2R1D1	Uncharacterized protein	27.8571	9	9	420	46.1	7.06	0.957	0.95	0.98	0.962333	1.075	1.051	1.003	1.043	1.008	0.996	0.978	0.994	1.08382	0.0248159	0.95302	0.0990238	1.03291	0.0654697
E2RN69	Uncharacterized protein	27.8409	7	7	352	37.2	5.19	1.117	1.091	1.116	1.108	0.982	0.963	0.99	0.978333	0.919	0.899	0.922	0.913333	0.882972	0.000374638	0.93356	0.00381374	0.824308	6.33122e-05
E2QWT7	Uncharacterized protein	27.8195	17	17	665	76.5	6.43	1.01	1.028	0.977	1.005	0.942	0.897	0.991	0.943333	1.129	0.966	1.061	1.052	0.93864	0.117382	1.11519	0.116969	1.04677	0.396753
E2R5K3	Pyrroline-5-carboxylate reductase	27.8125	8	4	320	33.7	8.03	0.924	0.939	0.95	0.937667	1.013	1.063	1.033	1.03633	1.007	1.033	1.038	1.026	1.10523	0.00381618	0.990029	0.584963	1.09421	0.00193765
E2QW80	Diacylglycerol kinase	27.7929	16	16	734	82.5	6.68	1.023	1.021	0.959	1.001	0.974	0.965	1.033	0.990667	1.062	0.965	0.997	1.008	0.989677	0.747339	1.0175	0.652029	1.00699	0.853035
E2RQX1	Uncharacterized protein	27.7662	13	13	479	53.4	7.61	0.996	1.011	0.986	0.997667	1.058	0.946	1.03	1.01133	1.013	0.981	0.98	0.991333	1.0137	0.711656	0.980224	0.601816	0.993652	0.652762
E2RIX0	Uncharacterized protein	27.7228	5	5	202	22.9	6.34	1.013	1.093	1	1.03533	0.992	0.96	0.996	0.982667	0.984	0.987	0.976	0.982333	0.949131	0.166979	0.999661	0.978916	0.948809	0.144334
E2R0P3	Uncharacterized protein	27.7228	6	6	303	32.5	7.39	0.934	0.894	0.941	0.923	1.109	1.069	1.033	1.07033	0.975	1.03	1.016	1.007	1.15962	0.00504343	0.940828	0.082367	1.09101	0.0189775
F1PTF7	MICOS complex subunit	27.7154	5	5	267	29.3	9.5	0.957	0.977	0.939	0.957667	0.981	1.103	1.034	1.03933	1.016	0.949	1.044	1.003	1.08528	0.0918198	0.965042	0.466418	1.04734	0.208281
E2QWC9	Uncharacterized protein	27.7087	11	11	563	61.5	8.16	0.939	0.968	0.934	0.947	1.011	1.055	1.027	1.031	1.015	1.012	1.038	1.02167	1.0887	0.00727691	0.990947	0.573772	1.07885	0.00509423
E2RQ10	Uncharacterized protein	27.6923	3	3	195	22.2	5.78	1.043	0.961	1.092	1.032	1.102	0.926	1.094	1.04067	0.961	0.908	0.915	0.928	1.0084	0.906025	0.891736	0.132365	0.899225	0.0670813
J9P8Y5	Uncharacterized protein	27.6776	22	22	943	106.3	6.87	0.978	1.025	0.961	0.988	0.974	1.036	1	1.00333	0.97	1.03	1.027	1.009	1.01552	0.59059	1.00565	0.841338	1.02126	0.485221
E2RHX6	Uncharacterized protein	27.6596	9	3	376	42.3	6.4	0.915	0.968	0.982	0.955	1.073	1.052	0.997	1.04067	1.006	1.025	0.982	1.00433	1.0897	0.0483437	0.965086	0.232571	1.05166	0.107921
F1Q3J6	Tyrosine-protein phosphatase non-receptor type	27.656	14	13	593	68	7.3	0.989	1.011	0.936	0.978667	1.046	1.065	1.002	1.03767	0.972	0.993	0.985	0.983333	1.06029	0.112034	0.947639	0.0504814	1.00477	0.84966
J9NT64	Uncharacterized protein	27.6471	4	4	170	19.3	5.07	1.006	1.051	0.971	1.00933	1.026	1.08	1.027	1.04433	0.993	0.925	0.921	0.946333	1.03468	0.297215	0.90616	0.0289908	0.937583	0.127954
J9P1A8	Uncharacterized protein	27.6382	18	18	796	87.1	6.24	1	0.978	0.939	0.972333	0.955	1.101	0.973	1.00967	1.038	1.004	1.01	1.01733	1.0384	0.491053	1.00759	0.878692	1.04628	0.0952288
F1PNX1	Uncharacterized protein	27.6316	14	14	608	67.9	6.46	1.057	1.031	0.955	1.01433	0.994	0.946	0.994	0.978	1.026	0.997	0.999	1.00733	0.96418	0.352083	1.02999	0.188628	0.993099	0.837544
E2R097	Uncharacterized protein	27.6276	15	15	666	74.6	5.97	1.011	1.038	0.959	1.00267	0.999	1.017	0.982	0.999333	1.028	0.981	0.984	0.997667	0.996676	0.901501	0.998332	0.931608	0.995013	0.865613
F1PWJ7	Uncharacterized protein	27.619	13	13	630	67.9	6.54	1.04	1.124	1.144	1.10267	0.973	1.006	0.975	0.984667	0.889	0.922	0.929	0.913333	0.892987	0.0246385	0.927556	0.0119503	0.828295	0.00518444
F6Y4G8	Mitogen-activated protein kinase	27.6042	9	4	384	44	7.49	1.036	0.966	1.072	1.02467	1.028	1.005	1.01	1.01433	0.944	0.95	0.988	0.960667	0.989915	0.762179	0.947092	0.0254758	0.937541	0.133197
E2REU7	Uncharacterized protein	27.6027	29	28	1047	119.9	5.66	0.988	0.997	0.982	0.989	0.96	1.11	1.001	1.02367	0.965	1.011	0.985	0.987	1.03505	0.483798	0.964181	0.476249	0.997978	0.8934
E2R2I1	Uncharacterized protein	27.5862	3	3	145	16.3	8.46	0.937	0.891	0.89	0.906	1.08	1.541	0.956	1.19233	0.923	0.913	0.87	0.902	1.31604	0.184238	0.7565	0.179574	0.995585	0.867332
E2QYN0	Uncharacterized protein	27.5568	10	10	352	38.6	9.41	1.058	1.053	0.969	1.02667	0.967	1.002	1.002	0.990333	0.992	0.977	0.98	0.983	0.96461	0.308087	0.992595	0.589923	0.957468	0.209516
H9GW63	Uncharacterized protein	27.5556	5	5	225	25.3	6.28	1.083	1.036	1.026	1.04833	1.069	1.059	0.916	1.01467	0.878	0.966	0.968	0.937333	0.967886	0.555879	0.923784	0.250821	0.894118	0.0323179
J9P3R8	Uncharacterized protein	27.5316	12	12	632	64.6	4.84	1.009	1.022	0.963	0.998	1.007	0.971	0.975	0.984333	1.019	0.995	1.039	1.01767	0.986306	0.554542	1.03386	0.122651	1.01971	0.421049
E2QTH4	Uncharacterized protein	27.5294	8	8	425	46.6	5.81	0.989	1.037	0.938	0.988	0.984	1.073	1.015	1.024	1.035	0.966	0.964	0.988333	1.03644	0.404857	0.965169	0.36582	1.00034	0.993225
E2RP04	Uncharacterized protein	27.5281	17	12	712	80.6	7.15	1.013	0.999	1.044	1.01867	0.971	0.947	1.007	0.975	1.026	0.997	0.996	1.00633	0.957134	0.117251	1.03214	0.192602	0.987893	0.497291
E2R4C1	Uncharacterized protein	27.5253	10	10	396	43.2	8.27	1.082	0.989	0.973	1.01467	0.829	0.94	1.047	0.938667	1.029	1.037	1.073	1.04633	0.925099	0.347862	1.1147	0.169734	1.03121	0.435466
F1PUR1	Uncharacterized protein	27.4864	14	14	553	62.3	8.1	0.991	0.974	0.975	0.98	1.036	0.982	1.007	1.00833	1.012	1.011	1.012	1.01167	1.02891	0.16199	1.00331	0.841312	1.03231	0.00456666
F1P8P0	Uncharacterized protein	27.4854	3	3	171	20	8.91	0.993	1.041	0.941	0.991667	1.085	1.095	1.027	1.069	0.953	0.937	0.929	0.939667	1.07798	0.0970075	0.879015	0.00442485	0.947563	0.155127
J9NVC8	Uncharacterized protein	27.4611	5	4	193	21.7	5.39	1.025	1.065	0.983	1.02433	1.033	0.993	0.974	1	0.982	0.961	0.985	0.976	0.976245	0.453998	0.976	0.274198	0.952815	0.123647
F6UMY5	Uncharacterized protein	27.4359	9	9	390	45.2	5.85	1.026	1.086	0.991	1.03433	1.003	1	1.039	1.014	0.981	0.926	0.948	0.951667	0.980342	0.540682	0.938527	0.0373189	0.920077	0.0611844
J9PA62	Uncharacterized protein	27.4336	3	3	113	12.7	7.44	0.832	0.885	0.871	0.862667	0.8	1.028	0.979	0.935667	1.181	1.226	1.198	1.20167	1.08462	0.362482	1.28429	0.0195741	1.39297	7.95384e-05
J9NWW4	Uncharacterized protein	27.4306	8	8	288	32.8	4.02	0.927	0.992	0.984	0.967667	1.005	1.041	1.057	1.03433	1.02	0.977	0.997	0.998	1.06889	0.0597683	0.964873	0.139926	1.03135	0.273879
F1PAI5	Uncharacterized protein	27.4194	6	6	310	34.8	7.01	1.006	0.992	0.974	0.990667	1.061	1.008	1.016	1.02833	0.981	0.969	0.993	0.981	1.03802	0.117309	0.953971	0.057247	0.990242	0.450303
E2R1C3	Proteasome subunit alpha type	27.4194	6	6	248	27.6	7.11	0.923	0.91	1.038	0.957	1.052	0.918	1.014	0.994667	1.031	1.053	1.06	1.048	1.03936	0.544559	1.05362	0.261404	1.09509	0.093961
J9NWP2	Uncharacterized protein	27.3973	1	1	73	8.3	4.32	0.728	0.905	0.633	0.755333	1.592	1.024	1.432	1.34933	0.919	0.886	0.881	0.895333	1.78641	0.0336148	0.663538	0.0553318	1.18535	0.157341
F1PEI0	Uncharacterized protein	27.3713	7	7	369	42.6	7.62	0.958	0.991	0.956	0.968333	1.005	1.175	1.112	1.09733	0.942	0.914	0.947	0.934333	1.13322	0.0643667	0.851458	0.032378	0.964888	0.0904517
E2RC24	Uncharacterized protein	27.3381	2	2	139	15.9	6.16	1.016	0.977	0.969	0.987333	0.949	1.005	0.965	0.973	0.993	1.159	0.966	1.03933	0.985483	0.551856	1.06817	0.349019	1.05267	0.449241
F1PGI1	Ras-related protein Rab-21	27.3109	5	5	238	26.2	7.94	0.936	0.974	0.915	0.941667	1.027	1.005	1.007	1.013	1.047	1.062	1.028	1.04567	1.07575	0.0186672	1.03225	0.0539553	1.11044	0.00636825
E2QVC0	Uncharacterized protein	27.3092	5	5	249	28.4	9.36	1.003	1.082	1.055	1.04667	1.013	1.016	1.012	1.01367	0.957	0.945	0.918	0.94	0.968471	0.22821	0.927327	0.00314503	0.898089	0.0146181
E2REJ7	Uncharacterized protein	27.2727	14	14	572	64.8	9.32	0.994	0.996	0.966	0.985333	0.953	1.019	1.038	1.00333	1.041	0.992	1.001	1.01133	1.01827	0.548732	1.00797	0.801861	1.02639	0.220094
J9P139	Uncharacterized protein	27.2414	6	6	290	33	6.55	0.972	0.822	1.039	0.944333	1.145	0.962	1.041	1.04933	0.97	1.035	1.015	1.00667	1.11119	0.275552	0.959339	0.491242	1.06601	0.404659
F1P6P0	Uncharacterized protein	27.2265	9	9	393	44.7	8.88	0.977	1.046	0.955	0.992667	0.991	1.072	1.02	1.02767	0.988	0.973	0.978	0.979667	1.03526	0.38877	0.953292	0.117241	0.986904	0.664004
F1PTD1	Uncharacterized protein	27.2085	6	6	283	31.2	7.64	0.952	0.999	0.941	0.964	1.04	1.01	1.034	1.028	1.044	0.995	0.987	1.00867	1.06639	0.0329426	0.981193	0.389224	1.04633	0.150691
F1PR95	Uncharacterized protein	27.2059	5	5	272	30.1	4.86	0.855	0.931	0.939	0.908333	1.062	1.069	1.068	1.06633	1.007	1.046	1.022	1.025	1.17394	0.0041718	0.961238	0.0233002	1.12844	0.0159647
P63091	Guanine nucleotide-binding protein G(s) subunit alpha	27.1574	8	7	394	45.6	5.82	1.025	1.079	1.03	1.04467	0.979	1.136	0.972	1.029	0.904	0.959	0.915	0.926	0.985003	0.79439	0.899903	0.140316	0.886407	0.0078664
F1PY11	Uncharacterized protein	27.1375	20	20	807	87.3	9.38	1.091	1.085	0.994	1.05667	0.935	1.035	0.973	0.981	1.002	0.944	0.942	0.962667	0.928391	0.152003	0.981312	0.629638	0.911041	0.0641262
E2RBC7	Uncharacterized protein	27.1318	5	5	258	28.8	5.6	1.044	0.922	1.057	1.00767	1.033	0.925	0.986	0.981333	0.995	1.003	1.034	1.01067	0.973867	0.646338	1.02989	0.430032	1.00298	0.949612
Q7YRF1	AP-3 complex subunit beta-1	27.1311	27	27	1091	121.1	5.76	1.044	1.069	0.949	1.02067	0.934	1.022	0.992	0.982667	1.019	0.983	0.989	0.997	0.962769	0.443694	1.01459	0.637161	0.976813	0.569213
E2RER1	Uncharacterized protein	27.0886	12	2	395	42.5	8.88	0.829	0.956	1.088	0.957667	0.969	0.971	0.913	0.951	1.11	1.009	1.157	1.092	0.993039	0.935292	1.14826	0.0415157	1.14027	0.19574
J9NST3	Importin subunit alpha	27.0872	13	5	539	60.2	4.94	1.291	1.087	1.04	1.13933	0.895	0.998	0.979	0.957333	0.889	0.931	0.891	0.903667	0.840257	0.0941857	0.943942	0.194539	0.793154	0.0394725
E2RSS5	Uncharacterized protein	27.0833	11	10	432	51.5	9.79	0.978	0.969	0.956	0.967667	1.029	0.944	0.987	0.986667	1.089	1.035	1.013	1.04567	1.01963	0.49531	1.0598	0.151549	1.08061	0.0292621
F1PP63	Uncharacterized protein	27.0833	8	8	432	47.3	8.05	0.971	0.974	0.977	0.974	0.995	0.956	1.028	0.993	1.069	0.982	1.047	1.03267	1.01951	0.414328	1.03995	0.3006	1.06023	0.0884887
J9PB46	Uncharacterized protein	27.0463	14	1	562	60.2	5.71	0.854	0.999	0.822	0.891667	1.163	0.82	1.156	1.04633	1.044	1.045	1.096	1.06167	1.17346	0.285625	1.01465	0.899919	1.19065	0.0408471
J9NTG9	Uncharacterized protein	27.027	8	1	296	32.8	6.98	1.107	0.776	1.277	1.05333	0.906	0.565	1.067	0.846	1.088	1.101	1.113	1.10067	0.803165	0.37663	1.30102	0.160772	1.04494	0.763999
F6X7N2	Uncharacterized protein	27.027	4	4	222	24.1	6.73	0.993	0.902	1.067	0.987333	1.02	0.93	1.002	0.984	1.02	1.047	1.019	1.02867	0.996624	0.954638	1.04539	0.198158	1.04186	0.442876
F1PB10	Uncharacterized protein	27.027	7	0	370	40.2	10.3	0.917	0.995	0.978	0.963333	1.006	1.025	0.976	1.00233	1.049	1.044	1.011	1.03467	1.04048	0.23114	1.03226	0.156954	1.07405	0.054624
F1PF09	Uncharacterized protein	26.9962	12	12	526	58.5	7.01	1.038	0.959	1.052	1.01633	1.033	0.823	1.021	0.959	0.995	1.044	1.034	1.02433	0.943588	0.481653	1.06813	0.401707	1.00787	0.818124
F1PAM9	Uncharacterized protein	26.9337	14	14	724	80.1	4.56	0.955	0.978	1.029	0.987333	1.04	1.048	0.98	1.02267	1.002	0.98	0.99	0.990667	1.03579	0.313	0.968709	0.225993	1.00338	0.890702
J9P0J7	Uncharacterized protein	26.9231	4	4	156	17.6	8.06	0.96	0.932	1.068	0.986667	1.021	0.922	1.007	0.983333	1.037	0.988	1.066	1.03033	0.996622	0.951713	1.0478	0.288177	1.04426	0.408151
E2QU97	Enolase-phosphatase E1	26.9231	5	5	260	28.8	4.74	0.912	0.951	0.88	0.914333	1.081	1.082	1.019	1.06067	0.993	1.067	1.014	1.02467	1.16004	0.00747525	0.966059	0.300692	1.12067	0.021483
E2RHZ8	Uncharacterized protein	26.9151	10	10	483	55.8	6.61	1.073	1.06	1.039	1.05733	1.029	0.959	0.99	0.992667	1	0.903	0.946	0.949667	0.93884	0.0455378	0.956682	0.281894	0.898172	0.0223961
E2R801	Uncharacterized protein	26.8836	11	11	584	64.6	7.99	1.047	0.982	0.949	0.992667	0.971	1.041	1.026	1.01267	0.993	1.005	0.987	0.995	1.02015	0.606178	0.982554	0.465576	1.00235	0.940292
E2QSQ5	Uncharacterized protein	26.8642	22	22	1046	116.8	6.7	1.038	0.947	0.94	0.975	1.137	1.111	1.172	1.14	0.861	0.899	0.896	0.885333	1.16923	0.0103302	0.776608	0.000289444	0.908034	0.0569958
F1PMU1	Pinin	26.8579	19	18	767	87.2	6.25	0.969	0.978	0.989	0.978667	0.932	0.991	1.009	0.977333	1.063	1.003	1.066	1.044	0.998638	0.958296	1.06821	0.0980181	1.06676	0.0374845
E2RPH0	Uncharacterized protein	26.8571	8	8	350	38.8	7.05	1.016	1.004	0.935	0.985	1.044	1.009	1.013	1.022	1.051	0.94	0.988	0.993	1.03756	0.250496	0.971624	0.441633	1.00812	0.854338
E2RE90	Uncharacterized protein	26.8248	23	22	1096	118.5	6.95	0.982	1.003	0.95	0.978333	0.998	1.031	0.993	1.00733	1.016	1.02	1.007	1.01433	1.02964	0.210836	1.00695	0.606065	1.0368	0.0860324
E2RDB1	Uncharacterized protein	26.8156	24	24	1074	119.7	8.48	1.009	1.005	1.011	1.00833	1.044	0.957	0.95	0.983667	0.975	1.008	1.041	1.008	0.975537	0.461087	1.02474	0.533307	0.999669	0.986935
Q5JCF5	Utrophin	26.7774	79	1	3432	394.5	5.29	0.643	0.828	1.205	0.892	1.04	1.488	1.135	1.221	0.961	0.917	0.781	0.886333	1.36883	0.1995	0.725908	0.0846085	0.993647	0.975581
J9P909	Uncharacterized protein	26.7717	2	2	127	14.1	9.8	0.793	0.879	0.925	0.865667	1.005	1.233	0.993	1.077	1.065	1.064	1.042	1.057	1.24413	0.0723422	0.98143	0.81131	1.22102	0.00830615
E2R204	Uncharacterized protein	26.7606	4	4	142	16.8	5.85	0.938	0.828	1.166	0.977333	1.075	0.914	0.978	0.989	0.905	1.138	1.058	1.03367	1.01194	0.920632	1.04516	0.618365	1.05764	0.665098
E2REW4	Uncharacterized protein	26.738	5	5	187	21.7	5.24	1.036	1.038	0.967	1.01367	1.044	0.979	0.987	1.00333	0.971	0.992	0.986	0.983	0.989806	0.755933	0.979734	0.395752	0.969747	0.273181
F1PWU8	Uncharacterized protein	26.7176	9	5	393	43.5	7.99	1.002	1.022	0.958	0.994	0.987	1.014	0.977	0.992667	1.013	1	1.026	1.013	0.998659	0.954365	1.02048	0.202629	1.01911	0.403099
F6XRK3	Uncharacterized protein	26.6925	12	12	517	58	9.44	0.921	0.998	0.943	0.954	0.946	1.061	0.939	0.982	1.017	1.109	1.066	1.064	1.02935	0.573217	1.0835	0.160395	1.1153	0.0349953
E2RBW9	Uncharacterized protein	26.6667	13	13	555	61.8	8.21	1.001	0.966	0.928	0.965	1.073	0.927	1.023	1.00767	1.014	1.036	1.032	1.02733	1.04421	0.422011	1.01952	0.673722	1.06459	0.0480418
F1PR63	Histone deacetylase	26.6393	11	7	488	55.2	5.91	1.019	0.961	1.155	1.045	0.97	0.877	0.992	0.946333	0.991	1.035	1	1.00867	0.905582	0.217261	1.06587	0.173703	0.965231	0.571563
J9P261	Uncharacterized protein	26.6204	7	1	432	48.3	5.03	1.518	0.989	0.93	1.14567	0.657	1.131	0.884	0.890667	0.963	0.873	1.054	0.963333	0.777422	0.332856	1.08159	0.645914	0.84085	0.400742
E2R7E3	Uncharacterized protein	26.6129	3	3	124	14.1	5.68	1.047	1.149	1.02	1.072	1.116	1.247	1.013	1.12533	0.834	0.797	0.778	0.803	1.04975	0.533075	0.713566	0.00983669	0.749067	0.00321229
J9NY23	Uncharacterized protein	26.6129	3	3	124	13.6	7.34	0.964	0.971	0.957	0.964	1.13	1.015	0.991	1.04533	1.039	0.958	0.974	0.990333	1.08437	0.132104	0.947385	0.329092	1.02732	0.353241
E2R856	Uncharacterized protein	26.5896	5	5	173	18.8	8.76	0.987	0.951	0.906	0.948	1.039	1.061	1.013	1.03767	0.966	1.055	1.022	1.01433	1.09459	0.0301306	0.977514	0.472504	1.06997	0.130813
E2QWU7	Uncharacterized protein	26.5823	5	5	237	25.4	9.5	0.927	1.044	0.934	0.968333	1.029	0.984	1.004	1.00567	1.058	0.985	1.035	1.026	1.03855	0.404137	1.02022	0.464565	1.05955	0.256385
E2RL88	Uncharacterized protein	26.5811	25	25	1091	122	7.02	1.067	1.09	1.049	1.06867	1.011	1.018	0.986	1.005	0.85	0.94	0.988	0.926	0.940424	0.0142352	0.921393	0.130365	0.8665	0.0276679
E2RRT3	Uncharacterized protein	26.57	6	2	207	23.7	9.29	0.94	0.952	1.054	0.982	0.964	1.109	1.141	1.07133	0.96	0.926	0.953	0.946333	1.09097	0.243543	0.883323	0.0871663	0.96368	0.396802
F1PWH1	Uncharacterized protein	26.5625	4	4	256	29.3	5.06	0.911	1.075	0.999	0.995	1.046	1.108	1.023	1.059	0.917	0.968	0.954	0.946333	1.06432	0.299646	0.89361	0.0189868	0.951089	0.3835
F1PAA9	Cadherin-1	26.5537	20	20	885	97.7	4.81	1.103	1.152	1.098	1.11767	1.006	1.032	0.922	0.986667	0.854	0.913	0.921	0.896	0.882792	0.0248302	0.908108	0.0825441	0.80167	0.0012442
J9P6P6	Uncharacterized protein	26.5487	3	1	113	12.7	4.72	0.827	0.931	1.138	0.965333	1.06	1.024	1.075	1.053	0.942	0.97	1.033	0.981667	1.09081	0.397612	0.932257	0.0819802	1.01692	0.872217
F1PTU4	Uncharacterized protein	26.5343	11	11	554	59.9	8.35	1.025	0.986	1.027	1.01267	1.013	0.926	0.994	0.977667	1.039	0.968	1.022	1.00967	0.965438	0.302375	1.03273	0.399821	0.997038	0.911059
E2RJR2	Uncharacterized protein	26.5252	8	8	377	42.7	9.86	0.893	0.975	0.955	0.941	0.985	1.042	1.06	1.029	1.04	1.013	1.037	1.03	1.09352	0.0582404	1.00097	0.968976	1.09458	0.0270983
F1PQC1	Uncharacterized protein	26.5101	13	12	596	61.5	7.96	1.041	0.988	0.927	0.985333	1.017	0.97	0.946	0.977667	1.029	1.047	1.034	1.03667	0.992219	0.853671	1.06035	0.0518885	1.0521	0.198799
E2RFF1	Uncharacterized protein	26.4737	19	19	933	102.1	6.99	0.976	1.007	0.987	0.99	1.021	1.067	0.974	1.02067	0.986	0.997	0.984	0.989	1.03098	0.340072	0.968975	0.308264	0.99899	0.924654
F1Q156	Uncharacterized protein	26.4706	5	5	204	23.2	5.68	1.094	1.164	1.097	1.11833	0.927	0.993	1.031	0.983667	0.907	0.898	0.889	0.898	0.879583	0.0239625	0.912911	0.0498577	0.802981	0.000713004
E2QYH6	Uncharacterized protein	26.4706	25	16	1054	117.5	6.55	0.967	0.948	1	0.971667	1.018	0.92	1.044	0.994	1.043	1.017	1.043	1.03433	1.02298	0.612341	1.04058	0.356555	1.06449	0.0231043
E2R9T5	SNARE-associated protein Snapin	26.4706	3	3	136	14.9	9.31	0.907	0.956	0.906	0.923	1.064	1.071	1.064	1.06633	1.009	0.997	1.026	1.01067	1.15529	0.00100459	0.947796	0.00310365	1.09498	0.00908538
E2QWN4	Uncharacterized protein	26.4624	7	7	359	40.2	6.9	1.008	0.938	1.011	0.985667	1.074	0.878	1.013	0.988333	1.032	1.02	1.026	1.026	1.00271	0.968077	1.03811	0.551552	1.04092	0.169518
J9P1H1	Uncharacterized protein	26.4569	79	1	3432	394.6	5.27	1.117	1.089	1.096	1.10067	1.042	0.975	0.97	0.995667	0.892	0.901	0.918	0.903667	0.904603	0.0131279	0.9076	0.0196782	0.821018	6.47385e-05
F1PFI5	Uncharacterized protein	26.4463	7	7	242	27.3	6.24	0.835	0.845	0.792	0.824	1.427	1.238	1.237	1.30067	0.876	0.879	0.871	0.875333	1.57848	0.00186475	0.672988	0.00254099	1.0623	0.0353441
F1PGY6	Uncharacterized protein	26.4286	4	4	280	30.6	6.34	0.979	0.965	0.958	0.967333	1.053	1.104	0.983	1.04667	0.966	1.031	0.961	0.986	1.08201	0.0898394	0.942038	0.219357	1.0193	0.469286
E2R730	PRA1 family protein	26.4045	4	4	178	19.4	8.95	1.004	0.999	0.966	0.989667	1.06	1	0.98	1.01333	1.021	0.948	1.022	0.997	1.02391	0.427556	0.983882	0.658996	1.00741	0.801138
E2R0Y4	Uncharacterized protein	26.4	11	11	500	55	8.69	0.993	0.966	0.95	0.969667	0.964	0.989	0.994	0.982333	1.035	1.061	1.048	1.048	1.01306	0.462534	1.06685	0.00532107	1.08078	0.00585597
E2R7G0	Uncharacterized protein	26.3889	4	4	216	24.3	5.64	0.974	1.028	0.948	0.983333	1.051	0.887	1.017	0.985	1.04	1.011	1.046	1.03233	1.00169	0.977379	1.04805	0.406961	1.04983	0.131694
A0A0D6CAE0	Transcription factor p65	26.3838	12	12	542	59.2	5.68	0.981	1.016	0.98	0.992333	0.944	0.971	1.001	0.972	1.05	0.998	1.059	1.03567	0.97951	0.372686	1.0655	0.0645524	1.04367	0.125106
E2QW34	Proteasome subunit beta type	26.3682	6	6	201	22.8	6.68	1.123	1.019	0.925	1.02233	0.823	0.932	1.084	0.946333	1.093	0.975	1.025	1.031	0.92566	0.467904	1.08947	0.365629	1.00848	0.902784
E2QWK2	Uncharacterized protein	26.3625	19	19	789	87.3	8.79	0.954	0.968	0.981	0.967667	1.013	0.961	0.994	0.989333	1.035	1.029	1.065	1.043	1.02239	0.273286	1.05425	0.0464323	1.07785	0.00518393
F1PEJ2	Uncharacterized protein	26.3547	7	7	406	44	5.15	1.021	1.038	0.975	1.01133	1.053	1.028	1.003	1.028	0.96	0.968	0.954	0.960667	1.01648	0.520949	0.934501	0.0108966	0.949901	0.0580608
F6XUT8	Uncharacterized protein	26.3441	27	27	1116	127.9	5.94	1.008	0.988	1.127	1.041	1.023	0.968	0.936	0.975667	0.925	1.019	1.006	0.983333	0.93724	0.263617	1.00786	0.853227	0.944605	0.332991
E2R5H4	Uncharacterized protein	26.3274	10	10	452	51.4	8.07	1.111	1.041	1.044	1.06533	0.977	1.044	1.013	1.01133	0.866	0.967	0.938	0.923667	0.949312	0.145709	0.913316	0.070144	0.867021	0.0198651
F1PC18	Uncharacterized protein	26.3158	10	10	437	49.6	7.85	1.038	0.971	1.043	1.01733	1.007	0.917	0.939	0.954333	0.99	1.049	1.045	1.028	0.938073	0.15214	1.07719	0.090103	1.01048	0.740283
E2QZA8	Peptidylprolyl isomerase	26.2887	13	12	582	64.3	5.68	0.974	0.931	1.062	0.989	1.021	0.964	0.995	0.993333	1.021	0.991	1.04	1.01733	1.00438	0.922654	1.02416	0.332571	1.02865	0.528559
E2RGG1	Uncharacterized protein	26.2745	6	6	255	29.7	6.83	0.919	1.033	0.975	0.975667	1.024	1.068	1.015	1.03567	1.005	0.987	0.975	0.989	1.0615	0.177962	0.95494	0.0656576	1.01367	0.7153
E2RJH3	Uncharacterized protein	26.2295	4	4	183	20.6	4.67	1.058	1.014	0.96	1.01067	1.009	1.029	1.026	1.02133	0.987	0.947	0.97	0.968	1.01055	0.731781	0.947781	0.0154304	0.957784	0.235898
E2RR33	Uncharacterized protein	26.212	26	26	1217	135.5	5.26	1.024	1.015	0.958	0.999	0.996	0.995	0.994	0.995	1.024	1.002	0.992	1.006	0.995996	0.855997	1.01106	0.309969	1.00701	0.773413
F1PWZ9	NADH dehydrogenase [ubiquinone] 1 alpha subcomplex subunit 12	26.2069	3	3	145	17.1	9.57	0.975	0.922	0.899	0.932	0.977	1.013	1.025	1.005	1.097	1.057	1.036	1.06333	1.07833	0.0523717	1.05804	0.0640921	1.14092	0.0102729
F1PA87	Uncharacterized protein	26.1965	10	4	397	46.1	8.6	1.09	0.914	1.076	1.02667	1.102	0.748	1.074	0.974667	1.011	0.961	1.024	0.998667	0.949351	0.702934	1.02462	0.84519	0.972727	0.663243
E2RTG1	Uncharacterized protein	26.1905	6	6	252	28.8	6.1	1.012	0.897	1.196	1.035	1.049	0.885	0.972	0.968667	1.049	0.949	0.993	0.997	0.93591	0.540031	1.02925	0.63664	0.963285	0.700023
F1Q2H2	Uncharacterized protein	26.1905	2	2	84	9	9.31	0.956	0.946	0.97	0.957333	1.005	1.041	1.009	1.01833	1.026	1.022	1.025	1.02433	1.06372	0.0102663	1.00589	0.628112	1.06999	0.000689205
F1PT97	Uncharacterized protein	26.1845	10	9	401	45	8.54	1.002	0.937	0.86	0.933	1.006	1.027	1.081	1.038	1.054	1.046	0.988	1.02933	1.11254	0.0879237	0.991651	0.790526	1.10325	0.104379
E2RIW6	Uncharacterized protein	26.1838	7	5	359	39.7	7.72	1.066	1	1.019	1.02833	1.088	0.91	1.007	1.00167	0.971	0.988	0.949	0.969333	0.974068	0.653514	0.96772	0.572536	0.942626	0.0596145
J9NZH7	Uncharacterized protein	26.183	6	6	317	36.1	8.6	0.935	0.96	0.966	0.953667	1.005	1.04	1.005	1.01667	1.042	1.028	1.019	1.02967	1.06606	0.0138217	1.01279	0.38849	1.07969	0.00281895
E2QW70	Uncharacterized protein	26.1745	7	4	298	33.8	8.68	1.039	1.015	1.043	1.03233	1.081	0.993	1.021	1.03167	0.907	0.946	0.955	0.936	0.999354	0.981748	0.90727	0.0327334	0.906684	0.0049167
E2R857	Uncharacterized protein	26.1538	10	10	455	52.4	6.48	1.087	0.927	1.05	1.02133	0.928	0.836	1.015	0.926333	1.03	1.086	1.041	1.05233	0.906984	0.250644	1.13602	0.081648	1.03035	0.578289
A0A140DDD1	BH3 interacting domain death agonist	26.1538	5	5	195	22.4	4.94	1	1.038	0.969	1.00233	1.016	1.026	1.033	1.025	0.989	0.947	0.982	0.972667	1.02261	0.331995	0.948943	0.0196732	0.970402	0.280756
E2R6I0	Uncharacterized protein	26.1438	7	7	306	32.9	5.06	0.915	1.033	0.949	0.965667	1.014	1.154	1.023	1.06367	0.985	0.95	0.975	0.97	1.10148	0.162051	0.91194	0.113799	1.00449	0.911413
J9PA22	Uncharacterized protein	26.1324	7	2	287	32.1	9.36	0.919	0.985	0.83	0.911333	1.015	1.037	1.016	1.02267	1.065	1.042	1.091	1.066	1.12217	0.0705907	1.04237	0.0523918	1.16971	0.0303647
E2RJ93	Uncharacterized protein	26.1273	18	18	754	83	9.22	1.036	1.018	1.033	1.029	0.914	1.001	0.949	0.954667	0.98	1.03	1.039	1.01633	0.927762	0.0453669	1.06459	0.119572	0.98769	0.545035
J9NSX3	Uncharacterized protein	26.1076	14	14	632	70.9	8.9	1.175	1.09	1.099	1.12133	0.874	0.951	1.031	0.952	0.947	0.903	0.929	0.926333	0.848989	0.0325595	0.973039	0.61468	0.8261	0.00283003
E2R471	Uncharacterized protein	26.0982	6	6	387	42.4	8.28	1.007	1.03	0.988	1.00833	1.02	1.012	1.035	1.02233	0.999	0.952	0.957	0.969333	1.01388	0.370466	0.948158	0.0316686	0.961322	0.112375
F1PP26	Uncharacterized protein	26.087	18	17	897	96.8	8.94	1.039	1.04	0.993	1.024	0.91	0.976	0.981	0.955667	1.051	1.001	1.01	1.02067	0.933268	0.0687566	1.06802	0.077879	0.996745	0.886098
J9P5D0	Uncharacterized protein	26.087	4	4	207	20.6	8.65	0.97	0.897	0.952	0.939667	1.122	1.213	1.029	1.12133	0.869	1.069	0.879	0.939	1.19333	0.0341608	0.837396	0.0957219	0.999291	0.992719
E2RJY4	Uncharacterized protein	26.087	6	6	299	33.8	8.43	0.953	0.912	0.935	0.933333	0.876	1.497	0.931	1.10133	0.966	0.961	0.971	0.966	1.18	0.445706	0.877119	0.53279	1.035	0.0555072
F6V2R0	Uncharacterized protein	26.0756	17	14	767	86.5	7.17	1.023	0.968	1.041	1.01067	0.985	0.928	1.01	0.974333	1.031	1.009	1.003	1.01433	0.96405	0.329123	1.04105	0.194793	1.00363	0.883808
F1PL92	Uncharacterized protein	26.07	5	5	257	26.9	11.15	0.939	0.79	1.295	1.008	1.088	0.883	1.025	0.998667	0.954	1.008	1.017	0.993	0.990741	0.956716	0.994326	0.93343	0.985119	0.925695
E2R2I4	Uncharacterized protein	26.0674	7	7	445	52.6	5.71	0.969	0.96	0.982	0.970333	0.964	0.98	0.986	0.976667	1.072	1.049	1.038	1.053	1.00653	0.527302	1.07816	0.00310847	1.08519	0.00224085
F1PPA2	Uncharacterized protein	26.0546	11	11	403	47.2	6.67	0.99	1.01	0.926	0.975333	1.076	0.98	1.04	1.032	1.008	0.97	1	0.992667	1.0581	0.207821	0.961886	0.263965	1.01777	0.567397
E2R869	KRR1 small subunit processome component	26.0526	10	10	380	43.5	9.83	0.953	0.944	0.919	0.938667	1.095	1.036	1.038	1.05633	0.985	1.019	1.011	1.005	1.12536	0.00575151	0.951404	0.078998	1.07067	0.0101006
F1Q0G6	Uncharacterized protein	26.0456	11	5	526	56.7	5.8	1.006	1.039	0.956	1.00033	1.027	1.051	1.015	1.031	1.012	0.929	0.963	0.968	1.03066	0.30912	0.938894	0.0748157	0.967677	0.396656
E2RHC4	pre-rRNA processing protein FTSJ3	26.0454	16	16	837	95.4	8.25	0.955	0.988	0.916	0.953	1.02	1.013	1.009	1.014	0.999	1.06	1.039	1.03267	1.06401	0.0442461	1.01841	0.362517	1.0836	0.0439854
F1PBI2	Uncharacterized protein	26.0417	5	5	288	30	5.82	1.013	1.117	0.935	1.02167	1.027	1.108	1.015	1.05	0.923	0.929	0.933	0.928333	1.02773	0.662749	0.884127	0.0143146	0.908646	0.151835
E2QYQ4	Uncharacterized protein	26.0369	9	9	434	48.5	7.96	0.969	0.885	0.969	0.941	1.212	0.89	1.119	1.07367	0.952	0.988	1.016	0.985333	1.14098	0.25405	0.917727	0.415981	1.04711	0.257147
J9NVL6	Uncharacterized protein	26.0252	20	1	1268	139.2	4.74	0.914	1.03	1.046	0.996667	1.004	0.93	1.045	0.993	1.078	0.972	0.981	1.01033	0.996321	0.948647	1.01746	0.735177	1.01371	0.811579
E2RFI6	Uncharacterized protein	26.0204	9	9	392	44.1	9.41	0.972	0.949	1.027	0.982667	1.043	0.943	1.03	1.00533	0.984	1.016	1.035	1.01167	1.02307	0.592271	1.0063	0.86421	1.02951	0.351298
J9JHK9	Phosphoinositide phospholipase C	26.0163	24	24	1230	138.7	6.11	1.018	1.022	0.978	1.006	1.017	0.986	0.984	0.995667	0.986	0.996	1.013	0.998333	0.989728	0.589633	1.00268	0.850593	0.992379	0.658923
F1PZ71	Uncharacterized protein	25.9843	6	6	254	27.8	9.83	1.016	1.055	1.016	1.029	0.983	0.971	0.95	0.968	0.957	1.015	1.036	1.00267	0.940719	0.0196283	1.03581	0.245847	0.974409	0.384076
E2RQA3	Uncharacterized protein	25.974	8	8	231	26.9	5.47	1.055	1.018	0.994	1.02233	1.088	1.066	0.96	1.038	0.925	0.958	0.935	0.939333	1.01532	0.735874	0.904945	0.0724466	0.918813	0.0148778
E2RSW0	Uncharacterized protein	25.9715	47	46	2033	225.2	7.8	1.048	1.004	1.055	1.03567	0.997	0.966	0.955	0.972667	0.968	1.005	1.002	0.991667	0.93917	0.0362055	1.01953	0.33347	0.957515	0.0913893
E2RH29	Uncharacterized protein	25.9452	15	12	767	86.4	6.89	1.033	1.007	0.949	0.996333	1.032	0.983	0.995	1.00333	0.989	1.001	1.011	1.00033	1.00703	0.820387	0.99701	0.8609	1.00401	0.883539
E2QZ99	Uncharacterized protein	25.9366	9	9	347	40.5	9.95	0.913	0.91	0.943	0.922	0.989	0.966	1.04	0.998333	1.022	1.117	1.099	1.07933	1.08279	0.0346816	1.08114	0.0902446	1.17064	0.00708816
F6XMH3	DNA primase large subunit	25.9332	11	11	509	58.7	8.38	0.985	0.999	0.954	0.979333	0.99	1.417	0.951	1.11933	0.901	0.901	0.902	0.901333	1.14295	0.403055	0.805241	0.217928	0.920354	0.00422043
E2RIX2	Uncharacterized protein	25.9155	10	8	355	38.4	7.81	0.954	0.992	1.005	0.983667	1.092	1.016	1.024	1.044	1.007	0.909	1	0.972	1.06134	0.102166	0.931034	0.144095	0.98814	0.75614
F1PLD5	Uncharacterized protein	25.9009	8	8	444	48.2	8.79	0.887	0.995	1.099	0.993667	0.941	1.068	0.919	0.976	1.066	0.976	1.049	1.03033	0.982221	0.829405	1.05567	0.371439	1.0369	0.614017
J9PA73	Uncharacterized protein	25.8621	1	1	58	6.5	9.83	1.813	0.661	0.998	1.15733	1.726	0.774	0.794	1.098	0.713	0.852	0.671	0.745333	0.948733	0.90448	0.67881	0.330651	0.644009	0.299958
J9NTA2	Uncharacterized protein	25.8503	2	2	147	16.6	7.42	0.974	0.946	0.989	0.969667	0.975	1.055	0.998	1.00933	1.011	1.005	1.046	1.02067	1.04091	0.214497	1.01123	0.696209	1.0526	0.0468136
F1PQW6	Uncharacterized protein	25.8427	7	7	356	37.8	8.25	1.032	0.965	0.905	0.967333	1.042	1.022	0.947	1.00367	1.066	0.991	1.03	1.029	1.03756	0.480075	1.02524	0.521802	1.06375	0.221264
E2RPA3	Uncharacterized protein	25.8333	1	1	120	13	6.67	1.046	0.986	0.565	0.865667	1.03	0.996	1.061	1.029	1.223	0.927	1.165	1.105	1.18868	0.34444	1.07386	0.457379	1.27647	0.246276
E2RDI0	Uncharacterized protein	25.8065	6	6	279	31.1	5.5	1.077	0.965	0.932	0.991333	1.142	0.966	0.979	1.029	1.012	0.94	0.986	0.979333	1.038	0.626827	0.951733	0.457173	0.987895	0.817378
E2REA9	Uncharacterized protein	25.7846	21	21	1179	129.6	5.66	1.102	0.967	0.959	1.00933	1.138	1.043	0.995	1.05867	0.852	0.981	0.963	0.932	1.04888	0.474668	0.880353	0.0953041	0.923382	0.276829
E2RGN2	Uncharacterized protein	25.7627	8	7	295	33.6	8.09	1.055	1.022	0.971	1.016	1.026	0.955	0.989	0.99	1.012	0.99	0.981	0.994333	0.974409	0.460734	1.00438	0.856502	0.978675	0.453306
F1PHT0	Uncharacterized protein	25.7592	23	23	955	109.1	8.9	0.974	0.975	0.963	0.970667	1.01	1.068	0.969	1.01567	0.978	1.041	1.023	1.014	1.04636	0.195368	0.998359	0.963564	1.04464	0.0861304
E2RLS8	Transcription elongation factor SPT5	25.759	22	22	1087	121	5.06	0.969	1.021	0.923	0.971	1.035	1.061	0.996	1.03067	0.985	1.007	1.002	0.998	1.06145	0.15442	0.968305	0.178211	1.02781	0.405722
E2R501	Uncharacterized protein	25.7576	5	5	264	29.6	6.15	1.108	0.971	0.951	1.01	0.896	0.972	1.032	0.966667	1.026	1.016	1.028	1.02333	0.957096	0.530045	1.05862	0.224958	1.0132	0.800892
E2RAE6	Sorting nexin	25.7426	10	8	404	46.7	7.09	1.008	0.926	1.037	0.990333	1.071	0.885	1.036	0.997333	0.998	1.025	1.013	1.012	1.00707	0.920691	1.01471	0.811565	1.02188	0.560185
F1PV61	Serine/threonine-protein phosphatase	25.6997	10	10	393	44.8	6.43	1.064	0.943	1.05	1.019	1.024	0.887	1.021	0.977333	1.004	1.013	0.995	1.004	0.95911	0.520154	1.02729	0.589084	0.98528	0.717135
F1PPL6	Uncharacterized protein	25.6831	3	1	183	20.7	4.94	0.938	0.979	0.915	0.944	1.055	1.062	0.98	1.03233	0.981	1.084	1.006	1.02367	1.09357	0.051891	0.991605	0.841523	1.08439	0.0927503
E2QZF6	Uncharacterized protein	25.6684	12	11	561	64.7	8.91	1.039	1.04	0.931	1.00333	0.963	1.047	0.99	1	0.983	1.019	0.988	0.996667	0.996678	0.943031	0.996667	0.908371	0.993355	0.868849
A0A0A0MPD3	NAD(P)H-hydrate epimerase	25.656	6	6	343	37	9.13	0.962	0.993	0.917	0.957333	0.964	1.048	1.044	1.01867	1.062	1.013	0.998	1.02433	1.06407	0.155903	1.00556	0.873865	1.06999	0.0843775
J9P4C1	Uncharacterized protein	25.6522	10	10	460	52.8	8.4	0.935	0.929	1.007	0.957	0.971	0.917	1.036	0.974667	1.069	1.056	1.081	1.06867	1.01846	0.699374	1.09644	0.0555616	1.11668	0.0128286
F1Q4F1	Oxysterol-binding protein	25.6442	18	18	815	90	7.27	0.979	1.007	0.951	0.979	1.075	0.956	0.969	1	1.055	0.995	1.014	1.02133	1.02145	0.635563	1.02133	0.635403	1.04324	0.15219
E2RFC9	Uncharacterized protein	25.641	4	4	156	18	8.21	1.002	1.019	0.937	0.986	0.977	1.011	1	0.996	1.051	1.001	1.003	1.01833	1.01014	0.729123	1.02242	0.308727	1.03279	0.339753
E2QXZ2	Uncharacterized protein	25.6007	24	23	1082	123.3	6.42	0.956	0.979	0.952	0.962333	1.029	0.977	1.03	1.012	1.03	1.021	1.026	1.02567	1.05161	0.0627984	1.0135	0.483007	1.06581	0.00198081
E2RFH3	Uncharacterized protein	25.5906	11	11	508	56.1	7.37	1.023	1.019	0.982	1.008	0.993	1.034	0.973	1	1.013	0.967	0.997	0.992333	0.992063	0.736757	0.992333	0.749939	0.984458	0.450736
F1PKR0	Uncharacterized protein	25.5892	6	6	297	32.3	7.11	1.137	1.011	1.236	1.128	0.957	0.866	0.881	0.901333	0.944	0.968	0.999	0.970333	0.799054	0.0330517	1.07655	0.0999212	0.860225	0.0783157
E2RBB8	Tyrosine-protein kinase	25.5859	12	9	512	58.7	7.34	0.965	1.093	1.028	1.02867	1.049	1.054	1.01	1.03767	0.933	0.928	0.941	0.934	1.00875	0.830865	0.900096	0.00198057	0.907971	0.0634031
F1PTE0	Uncharacterized protein	25.5814	11	7	344	39.6	11.56	1.031	0.983	0.978	0.997333	0.902	0.937	0.986	0.941667	1.083	1.051	1.05	1.06133	0.944184	0.133635	1.12708	0.0109209	1.06417	0.0332636
E2RNP6	Uncharacterized protein	25.5639	3	3	133	14.4	9.31	0.98	1.053	0.939	0.990667	0.874	1.145	1.017	1.012	0.986	1.059	0.948	0.997667	1.02153	0.814355	0.985837	0.873946	1.00707	0.887882
F1PB46	Uncharacterized protein	25.5518	23	23	1178	130.1	5.99	0.969	1	0.973	0.980667	0.997	1.002	1.006	1.00167	1.038	0.993	1.024	1.01833	1.02141	0.105562	1.01664	0.286034	1.03841	0.0842511
E2RMY7	Uncharacterized protein	25.5398	21	2	1343	147.5	4.77	0.987	1.054	0.972	1.00433	0.914	1.13	1.027	1.02367	0.987	0.971	0.957	0.971667	1.01925	0.788103	0.949202	0.455364	0.967474	0.287616
E2RGU5	Uncharacterized protein	25.5319	3	2	141	15.8	6.16	1.223	1.072	1.039	1.11133	0.93	1.19	1.04	1.05333	0.819	0.858	0.83	0.835667	0.94781	0.571647	0.793354	0.0461613	0.75195	0.00885398
E2R071	Uncharacterized protein	25.5255	7	7	333	35.9	6.28	1.053	1.028	1.112	1.06433	1.05	0.909	1.021	0.993333	0.927	0.964	0.936	0.942333	0.933292	0.22618	0.948658	0.314811	0.885374	0.0110571
E2QTE3	Uncharacterized protein	25.5172	6	6	290	32.6	7.11	0.867	0.977	0.861	0.901667	1.028	1.047	1.064	1.04633	1.059	0.984	1.113	1.052	1.16044	0.0208608	1.00542	0.891008	1.16673	0.0473186
Q9MYU9	Phospholipid hydroperoxide glutathione peroxidase (Fragment)	25.5102	2	2	98	10.7	6.51	0.868	0.92	1	0.929333	1.005	1.042	1.022	1.023	1.071	1.045	1.027	1.04767	1.10079	0.0784797	1.02411	0.212751	1.12733	0.0430362
E2QXV5	Uncharacterized protein	25.4934	26	26	1216	137	6.98	1.051	0.941	1.04	1.01067	0.961	0.796	1.034	0.930333	1.095	1.043	1.04	1.05933	0.920515	0.36457	1.13866	0.150335	1.04815	0.282997
J9JHR7	Uncharacterized protein	25.4902	3	3	153	17.4	9.36	1.003	0.99	1.011	1.00133	1.019	1.017	0.972	1.00267	0.979	1.03	0.978	0.995667	1.00133	0.939547	0.993019	0.776288	0.994341	0.771408
E2RRJ3	Uncharacterized protein	25.483	20	20	1087	114.3	7.11	1.024	1.018	1.026	1.02267	0.938	0.984	0.958	0.96	1.022	1.013	1.016	1.017	0.938722	0.00979951	1.05938	0.0137146	0.994459	0.188088
E2RCJ3	Uncharacterized protein	25.4731	16	16	687	76.9	8.92	1.003	1.034	0.98	1.00567	0.982	1.01	0.929	0.973667	1.023	1.012	1.028	1.021	0.96818	0.323475	1.04861	0.122313	1.01525	0.401264
E2RND5	Uncharacterized protein	25.4688	11	11	640	71	4.56	0.998	1.039	0.927	0.988	1.042	1.039	0.987	1.02267	0.995	0.999	0.974	0.989333	1.03509	0.404955	0.967405	0.161972	1.00135	0.970267
J9P553	Uncharacterized protein	25.4658	4	4	161	18.4	10.04	1.023	1.03	0.889	0.980667	0.92	0.999	1.083	1.00067	1.022	1.023	1.012	1.019	1.02039	0.776069	1.01832	0.717451	1.03909	0.451635
F1P9G4	Uncharacterized protein	25.4593	10	10	381	43.3	8.97	0.967	0.999	0.948	0.971333	0.983	1.053	1.052	1.02933	1.004	0.996	0.998	0.999333	1.05971	0.102914	0.970855	0.267222	1.02883	0.136793
E2RED3	Uncharacterized protein	25.4545	5	5	275	30.3	8.22	1.121	0.873	1.208	1.06733	1.083	0.687	1.032	0.934	0.932	1.044	1.02	0.998667	0.875078	0.451042	1.06924	0.642372	0.935665	0.55234
J9P2E5	Uncharacterized protein	25.4323	19	2	983	110.4	5.47	1.127	1.072	1.233	1.144	1.006	0.917	0.927	0.95	0.888	0.912	0.919	0.906333	0.83042	0.0242859	0.954035	0.215092	0.792249	0.00785141
E2RMS8	Uncharacterized protein	25.4181	14	14	598	70.5	7.68	1.002	0.934	1.041	0.992333	1.054	0.971	0.968	0.997667	0.973	1.035	1.023	1.01033	1.00537	0.905282	1.0127	0.728223	1.01814	0.648427
E2R2C8	Uncharacterized protein	25.3863	11	10	453	50.6	6.38	1.102	1.031	0.994	1.04233	0.95	0.951	0.874	0.925	0.973	1.068	1.059	1.03333	0.887432	0.0448025	1.11712	0.0520872	0.991366	0.847327
F1PAY2	Uncharacterized protein	25.3829	8	8	457	50.3	7.58	0.94	0.97	0.94	0.95	1.024	1.042	1.033	1.033	1.042	0.997	1.013	1.01733	1.08737	0.0018108	0.984834	0.330547	1.07088	0.0151994
E2RSH8	Tyrosine-protein kinase	25.3731	11	6	536	59.9	7.42	1.102	1.024	1.089	1.07167	0.949	0.858	0.966	0.924333	1.029	0.976	1.008	1.00433	0.862519	0.023442	1.08655	0.0960179	0.93717	0.0783424
E2REB4	Probable cytosolic iron-sulfur protein assembly protein CIAO1	25.3687	6	6	339	37.8	4.86	1.074	1.039	1.025	1.046	0.988	0.923	1.001	0.970667	0.99	0.991	0.968	0.983	0.92798	0.0556476	1.01271	0.651019	0.939771	0.0184035
E2RG35	Uncharacterized protein	25.3555	8	8	422	47	8.54	1.035	1.071	1.056	1.054	0.96	0.985	0.982	0.975667	0.972	0.985	0.953	0.97	0.92568	0.00391028	0.994192	0.666052	0.920304	0.00385837
E2REK5	Uncharacterized protein	25.3521	19	19	923	104.2	5.57	1.044	0.984	0.999	1.009	1.039	0.956	1.009	1.00133	0.99	0.985	0.994	0.989667	0.992402	0.812291	0.988349	0.657559	0.980839	0.348339
E2QV49	Uncharacterized protein	25.3521	3	3	71	8.3	9.98	0.913	0.895	1.04	0.949333	1.084	0.943	1.015	1.014	0.968	1.092	1.05	1.03667	1.06812	0.349903	1.02235	0.699416	1.09199	0.208981
F1PZW8	Uncharacterized protein	25.3425	7	7	292	34.2	6.34	1.037	1.052	1.053	1.04733	0.987	1.006	0.961	0.984667	0.939	0.953	1.012	0.968	0.940165	0.0111082	0.983074	0.554834	0.924252	0.0259251
E2R512	Uncharacterized protein	25.3333	9	9	300	33	6.55	0.967	1.066	0.89	0.974333	0.944	1.297	0.962	1.06767	1	0.945	0.929	0.958	1.09579	0.498629	0.897284	0.400858	0.983236	0.782383
J9P5H1	Uncharacterized protein	25.3323	30	30	1279	144.4	6.02	1.056	1.026	1.048	1.04333	1.051	0.956	0.992	0.999667	0.952	0.962	0.957	0.957	0.958147	0.207949	0.957319	0.200162	0.917252	0.000787632
F1Q4I1	Uncharacterized protein	25.3275	14	14	687	77.8	6.84	0.976	0.989	1.008	0.991	1.016	0.992	1.015	1.00767	1.024	0.976	1.004	1.00133	1.01682	0.242258	0.993715	0.712023	1.01043	0.570376
E2QRU0	Uncharacterized protein	25.2964	7	7	253	29.8	9.06	1.007	0.999	0.989	0.998333	1.024	1.029	1.006	1.01967	0.982	0.98	0.982	0.981333	1.02137	0.0705294	0.962406	0.00545649	0.982972	0.0317189
E2R1E3	Uncharacterized protein	25.2818	14	12	621	69.9	7.15	1.003	1.004	0.982	0.996333	0.972	0.975	1.004	0.983667	1.074	0.98	1.006	1.02	0.987287	0.367259	1.03694	0.29006	1.02375	0.459209
J9P1B6	Sulfiredoxin	25.2632	2	2	95	10.5	6	0.838	1.061	0.968	0.955667	1.023	1.467	0.958	1.14933	0.882	0.946	0.857	0.895	1.20265	0.324436	0.778712	0.191771	0.936519	0.434346
F6XYC2	Uncharacterized protein	25.2619	20	16	859	97.5	6.55	1.052	1.014	0.966	1.01067	0.956	0.996	0.999	0.983667	0.995	1.004	1.018	1.00567	0.973285	0.396824	1.02237	0.226106	0.995053	0.85559
E2QYE1	Uncharacterized protein	25.2404	9	2	416	46.5	5.29	1.055	0.995	1.02	1.02333	0.935	1.065	0.96	0.986667	0.998	0.963	1.009	0.99	0.964169	0.446357	1.00338	0.940795	0.967427	0.208479
E2RSA6	Uncharacterized protein	25.222	14	14	563	65.2	5.02	1.009	1.03	1.048	1.029	1	1.038	0.989	1.009	0.931	1.006	0.95	0.962333	0.980564	0.343636	0.95375	0.158564	0.935212	0.0570928
J9PBM6	Uncharacterized protein	25.2033	2	2	123	13.7	5.52	0.853	0.931	0.833	0.872333	0.983	1.01	1.105	1.03267	1.027	1.13	1.128	1.095	1.1838	0.0280247	1.06036	0.282597	1.25525	0.00794218
E2RMX9	Aconitate hydratase	25.1942	18	18	901	99.6	8.28	1.061	1.073	0.957	1.03033	0.915	0.968	0.995	0.959333	1.068	0.975	0.988	1.01033	0.93109	0.179446	1.05316	0.244212	0.980589	0.691884
E2RQS9	Acetyltransferase component of pyruvate dehydrogenase complex	25.1932	13	13	647	68.8	8.13	0.96	0.972	0.908	0.946667	1.048	1.033	1.037	1.03933	1.026	0.991	1.025	1.014	1.09789	0.0100339	0.975625	0.109465	1.07113	0.0416313
F1PML6	Uncharacterized protein	25.1908	6	6	393	43.7	8.5	0.938	0.826	1.026	0.93	1.093	0.906	1.135	1.04467	1.016	1.025	1.036	1.02567	1.1233	0.2767	0.981812	0.801209	1.10287	0.175348
F1P996	Uncharacterized protein	25.1732	9	9	433	49.2	8.15	1.101	1.059	0.969	1.043	0.89	1.005	0.994	0.963	0.998	1.004	0.98	0.994	0.923298	0.208899	1.03219	0.453106	0.95302	0.283601
E2RC52	Uncharacterized protein	25.1488	17	10	672	73.5	8.72	0.869	0.915	0.867	0.883667	1.168	1.14	1.133	1.147	0.965	0.941	1.001	0.969	1.298	0.000156355	0.844813	0.000959895	1.09657	0.0219771
E2RF16	Uncharacterized protein	25.1337	11	11	561	64.9	6.14	1.038	1.015	0.999	1.01733	0.995	1.041	0.965	1.00033	0.982	0.978	0.986	0.982	0.98329	0.531181	0.981673	0.455708	0.965269	0.037707
E2R4A5	Uncharacterized protein	25.1232	9	7	406	43	4.79	0.96	0.947	0.967	0.958	0.997	1.026	1.014	1.01233	1.042	1.03	1.017	1.02967	1.05672	0.00608887	1.01712	0.192953	1.07481	0.00152452
E2RL53	Uncharacterized protein	25.1142	5	5	438	47.2	5.08	0.942	1.004	0.905	0.950333	0.97	1.014	1.063	1.01567	0.978	1.076	1.048	1.034	1.06875	0.172961	1.01805	0.667711	1.08804	0.111049
F1PP35	Uncharacterized protein	25.1131	10	10	442	47.7	7.64	0.971	0.939	0.965	0.958333	1.024	0.961	1.011	0.998667	1.061	1.041	1.028	1.04333	1.04209	0.134836	1.04473	0.105953	1.0887	0.00346205
J9NWY3	Uncharacterized protein	25.1101	7	7	454	51.6	7.15	0.896	1.031	0.864	0.930333	1.02	1.273	1.084	1.12567	0.953	0.965	0.915	0.944333	1.20996	0.0998787	0.83891	0.0792105	1.01505	0.805949
J9P788	Signal recognition particle receptor subunit alpha	25.097	17	3	773	83.9	9.76	0.914	0.998	0.915	0.942333	1.012	1.11	0.98	1.034	0.994	1.042	1.035	1.02367	1.09728	0.128794	0.990006	0.817233	1.08631	0.0617554
F1P7W7	Uncharacterized protein	25.0958	11	9	522	58.8	6.02	1.021	0.961	0.953	0.978333	1.021	1.001	0.995	1.00567	0.97	1.057	1.02	1.01567	1.02794	0.297713	1.00994	0.724142	1.03816	0.32249
E2RNK5	Uncharacterized protein	25.0859	5	4	291	32.9	6.96	0.894	1	0.986	0.96	1.105	1.052	1.06	1.07233	0.987	0.955	0.96	0.967333	1.11701	0.0389058	0.902083	0.00549869	1.00764	0.842958
E2R2B7	Uncharacterized protein	25.0653	7	7	383	42.2	8.03	0.961	1.057	1.05	1.02267	1.044	1.077	0.947	1.02267	0.937	0.954	0.973	0.954667	1	1	0.933507	0.167434	0.933507	0.105334
E2RDX1	Uncharacterized protein	25.062	9	8	403	47	5.2	0.958	0.993	1.004	0.985	1.034	1.019	0.99	1.01433	0.98	0.997	1.026	1.001	1.02978	0.196558	0.986855	0.513758	1.01624	0.453798
F6V5G7	Uncharacterized protein	25.0569	12	12	439	51.5	9.94	0.969	0.926	1.005	0.966667	0.994	0.945	1.034	0.991	1.05	1.037	1.04	1.04233	1.02517	0.518444	1.0518	0.119926	1.07828	0.0309172
E2R0H0	Uncharacterized protein	25.0549	10	10	455	48.9	8.82	0.929	1.035	0.919	0.961	0.977	1.12	0.992	1.02967	1.017	1.002	1.008	1.009	1.07145	0.306447	0.979929	0.673776	1.04995	0.268299
E2RHC6	DNA (cytosine-5)-methyltransferase	25.0465	33	33	1613	182.4	7.37	1.136	1.097	1.151	1.128	0.963	0.985	0.947	0.965	0.893	0.917	0.91	0.906667	0.855496	0.00112042	0.939551	0.0112777	0.803783	0.000230131
J9NUD2	Uncharacterized protein	25	3	1	196	22.1	5.24	1.044	1.096	1.123	1.08767	0.985	0.811	0.955	0.917	1.024	0.946	1.016	0.995333	0.843089	0.043342	1.08542	0.255945	0.915109	0.0529149
E2RBY0	Uncharacterized protein	25	6	6	440	48.7	4.88	1.019	0.949	0.958	0.975333	1.053	1.016	1.018	1.029	0.959	1.025	1.002	0.995333	1.05502	0.0988752	0.967282	0.213329	1.02051	0.532134
E2RH59	Glucosamine-6-phosphate isomerase	25	6	3	276	31.1	6.9	0.994	0.934	1.036	0.988	1.081	0.95	1.043	1.02467	0.995	1.008	0.958	0.987	1.03711	0.494958	0.96324	0.417403	0.998988	0.977394
E2RDI6	Uncharacterized protein	25	2	2	124	14.7	10.05	0.98	0.894	0.945	0.939667	1.229	1.091	1.143	1.15433	0.921	0.868	0.929	0.906	1.22845	0.0105526	0.784869	0.00507951	0.964172	0.344843
J9NSU1	Uncharacterized protein	25	7	7	400	42.8	6.43	0.973	0.99	0.932	0.965	1.034	1.019	1.034	1.029	1.031	0.988	0.998	1.00567	1.06632	0.0233699	0.977324	0.169008	1.04214	0.132415
J9P8E3	Uncharacterized protein	25	22	22	976	109.3	6.21	0.971	1	0.944	0.971667	1.023	1.063	0.996	1.02733	0.994	1.03	0.981	1.00167	1.05729	0.0926489	0.975016	0.351538	1.03087	0.2412
J9P098	Uncharacterized protein	25	2	2	92	10.8	9.76	0.902	0.895	1.146	0.981	1.062	0.942	0.989	0.997667	1.004	1	1.061	1.02167	1.01699	0.861496	1.02406	0.58162	1.04145	0.656744
F1PCS9	Uncharacterized protein	24.96	12	11	625	68.9	6.54	0.982	1.008	0.955	0.981667	1	1.035	1.027	1.02067	1.03	0.974	0.989	0.997667	1.03973	0.104125	0.977466	0.310081	1.0163	0.519374
J9NV14	Uncharacterized protein	24.933	8	7	373	42.6	5.74	1.134	1.019	1.086	1.07967	1.125	0.989	0.989	1.03433	0.819	0.937	0.901	0.885667	0.958012	0.465675	0.856268	0.060167	0.820315	0.0158908
F1P666	Uncharacterized protein	24.9292	7	6	353	41.5	8.63	0.765	0.735	0.877	0.792333	0.906	2.49	0.843	1.413	0.802	0.786	0.795	0.794333	1.78334	0.314868	0.562161	0.314893	1.00252	0.965499
J9P516	Uncharacterized protein	24.9191	6	5	309	36	7.68	0.96	1.028	0.924	0.970667	1.011	1.035	1.006	1.01733	1.006	0.998	1.031	1.01167	1.04808	0.215893	0.99443	0.69359	1.04224	0.270244
E2R9Q7	Uncharacterized protein	24.8996	4	4	249	26.6	12.23	0.912	0.747	1.148	0.935667	0.973	0.707	1.049	0.909667	1.13	1.105	1.23	1.155	0.972212	0.875602	1.2697	0.0905714	1.23441	0.147788
E2R8L4	Uncharacterized protein	24.8927	4	4	233	25.8	5.44	0.886	0.902	1.142	0.976667	1.174	0.819	1.002	0.998333	1.002	0.999	1.075	1.02533	1.02218	0.877359	1.02705	0.810571	1.04983	0.603504
F6XRT0	Uncharacterized protein	24.8796	13	13	623	71	8.87	0.978	0.974	0.947	0.966333	1.025	1.111	1.04	1.05867	0.97	0.965	0.99	0.975	1.09555	0.0308441	0.92097	0.0387286	1.00897	0.522273
E2R095	5'-nucleotidase	24.8792	10	10	414	46.5	6.95	1.101	1	0.977	1.026	0.976	0.925	0.986	0.962333	1.019	0.995	1.021	1.01167	0.937947	0.20857	1.05126	0.075278	0.98603	0.731776
F1PLS1	Uncharacterized protein	24.878	16	16	820	91.7	7.46	1.019	1.091	0.929	1.013	1.026	0.993	1.033	1.01733	1.018	0.913	0.979	0.97	1.00428	0.933042	0.953473	0.225155	0.957552	0.485326
E2RJN7	Uncharacterized protein	24.8731	5	5	197	21.8	8.43	1.099	1.014	1.002	1.03833	1.035	1.041	0.952	1.00933	0.923	0.975	0.96	0.952667	0.972071	0.527081	0.943857	0.15728	0.917496	0.0665147
J9P5D6	Uncharacterized protein	24.8705	9	9	386	43.4	8.87	0.991	0.995	0.969	0.985	1.016	0.959	1.03	1.00167	1.006	1.007	1.027	1.01333	1.01692	0.511701	1.01165	0.635307	1.02876	0.0554633
E2R4H6	Uncharacterized protein	24.8503	7	7	334	36.6	8.27	1	0.978	0.935	0.971	1.052	1.099	1.012	1.05433	0.976	0.975	0.974	0.975	1.08582	0.0575847	0.924755	0.0343617	1.00412	0.844321
E2RI73	Uncharacterized protein	24.812	2	2	133	15.2	5.8	1.057	0.91	1.136	1.03433	1.114	0.791	1.007	0.970667	0.945	1.025	1.015	0.995	0.938447	0.611703	1.02507	0.816626	0.961972	0.608309
E2RL65	Uncharacterized protein	24.8045	19	19	895	100.2	5.67	0.992	1.054	0.991	1.01233	1.003	1.021	1.011	1.01167	0.987	0.978	0.962	0.975667	0.999341	0.976723	0.964415	0.0159831	0.96378	0.172135
F1Q482	Uncharacterized protein	24.8042	6	6	383	42.3	6.61	0.901	0.951	1.071	0.974333	1.041	1.073	0.962	1.02533	0.986	1.007	1.007	1	1.05234	0.445103	0.975293	0.494279	1.02634	0.640755
E2QYJ4	DNA-directed RNA polymerase subunit	24.8	2	2	125	14.5	5.14	1.195	1.032	1.085	1.104	0.878	0.928	1.066	0.957333	0.935	0.932	0.949	0.938667	0.86715	0.118257	0.980501	0.757532	0.850242	0.0266853
E2RGM1	Uncharacterized protein	24.8	3	3	125	14.1	5.47	1.08	1.06	1.017	1.05233	1.05	1.091	1	1.047	0.872	0.901	0.928	0.900333	0.994932	0.876536	0.859917	0.0089771	0.855559	0.0035037
J9NWW3	Uncharacterized protein	24.7934	3	3	121	13.1	10.61	0.883	0.976	0.902	0.920333	1.076	1.187	1.009	1.09067	0.988	0.971	1.009	0.989333	1.18508	0.0450305	0.90709	0.128754	1.07497	0.0859149
E2RTL6	Uncharacterized protein	24.7561	20	19	820	95.6	9.55	0.995	0.988	1.01	0.997667	0.985	0.97	1.028	0.994333	1.018	1.009	0.997	1.008	0.996659	0.866151	1.01374	0.49921	1.01036	0.309926
J9NRG5	Uncharacterized protein	24.7338	26	26	1221	132.7	6.79	0.989	1.023	0.989	1.00033	1	0.972	0.994	0.988667	1.037	0.992	1.004	1.011	0.988337	0.456676	1.02259	0.233312	1.01066	0.576998
H9GW76	Uncharacterized protein	24.7227	13	13	631	71	8.51	0.98	0.988	0.954	0.974	1.044	1.038	1.014	1.032	0.98	1.019	0.984	0.994333	1.05955	0.01353	0.963501	0.0708698	1.02088	0.274873
E2R0B4	Uncharacterized protein	24.7126	4	4	174	20	9.47	1.003	1.007	1.099	1.03633	1.002	1.057	1.08	1.04633	0.872	0.897	0.983	0.917333	1.00965	0.810133	0.876712	0.0341547	0.885172	0.0607699
F1PJS0	Uncharacterized protein	24.6951	5	5	328	35.6	7.64	0.967	0.952	1.006	0.975	1.015	0.967	1.034	1.00533	1.039	1.006	1.013	1.01933	1.03111	0.301993	1.01393	0.564541	1.04547	0.0796138
J9P1M8	Nucleoporin NUP53	24.6795	6	6	312	33.5	9.36	1.012	1.008	0.946	0.988667	0.941	1.033	0.984	0.986	1.019	1.033	1.025	1.02567	0.997303	0.941423	1.04023	0.214124	1.03742	0.164074
E3TH10	PTPRF interacting protein binding protein 1	24.6479	18	1	994	110.7	5.34	0.807	1.511	0.876	1.06467	0.906	1.779	0.842	1.17567	0.72	0.774	0.786	0.76	1.10426	0.782645	0.646442	0.241912	0.713838	0.247108
E2R1K0	Uncharacterized protein	24.6377	4	4	138	15.6	7.61	0.98	0.935	0.931	0.948667	1.052	1.026	1.019	1.03233	0.973	1.06	1.024	1.019	1.08819	0.0109236	0.987084	0.649223	1.07414	0.077168
E2RT56	Uncharacterized protein	24.6377	4	4	207	22.9	8.82	0.938	0.979	0.896	0.937667	0.964	1.065	1.016	1.015	0.999	1.062	1.081	1.04733	1.08247	0.109814	1.03186	0.445732	1.11696	0.0334886
E2R476	Uncharacterized protein	24.6147	44	44	2141	242.4	6.89	0.977	0.947	1.002	0.975333	1.009	1.029	0.989	1.009	0.958	1.06	1.029	1.01567	1.03452	0.161806	1.00661	0.846667	1.04135	0.302645
E2QXN9	Cystathionine beta-synthase	24.5872	9	9	545	60.1	6.92	1.018	0.982	1.013	1.00433	1.004	0.919	0.994	0.972333	1.051	1.011	1.008	1.02333	0.968138	0.333069	1.05245	0.166451	1.01892	0.347303
F1PPG1	Uncharacterized protein	24.5763	2	2	118	13.2	10.73	0.92	1.154	0.928	1.00067	1.016	1.026	0.93	0.990667	0.973	1.063	0.989	1.00833	0.990007	0.909403	1.01783	0.690104	1.00766	0.929627
F1PJ50	Uncharacterized protein	24.5455	3	3	110	12.5	10.17	0.864	0.926	0.999	0.929667	1.154	1.178	1.049	1.127	0.927	0.933	0.969	0.943	1.21226	0.0238135	0.836735	0.0116025	1.01434	0.762212
F6XTD9	Uncharacterized protein	24.5324	26	25	1390	155	6.24	1.026	0.969	0.989	0.994667	0.992	0.965	0.992	0.983	1	1.043	1.025	1.02267	0.988271	0.571772	1.04035	0.06135	1.02815	0.250206
E2RGI3	U1 small nuclear ribonucleoprotein C	24.5283	3	3	159	17.4	9.67	0.955	0.974	1.01	0.979667	0.872	0.95	1.039	0.953667	1.056	1.086	1.059	1.067	0.97346	0.636182	1.11884	0.0825234	1.08915	0.00958405
E2QYN4	Uncharacterized protein	24.5283	3	3	106	12.2	9.35	0.923	0.993	0.894	0.936667	1.067	1.078	1.047	1.064	1.041	0.965	0.992	0.999333	1.13594	0.0143713	0.939223	0.0545533	1.0669	0.164278
F1PF47	Uncharacterized protein	24.5259	19	19	791	89	6.73	0.964	1.006	0.905	0.958333	0.996	1.03	1.015	1.01367	1.056	1.008	1.021	1.02833	1.05774	0.147839	1.01447	0.446357	1.07304	0.0983743
J9NZ28	Uncharacterized protein	24.493	15	15	641	68.8	4.77	1.033	1.1	1.006	1.04633	0.997	1.041	0.988	1.00867	0.953	0.938	0.945	0.945333	0.964001	0.309469	0.937211	0.0201356	0.903472	0.0233364
J9P5T7	Protein phosphatase 1 regulatory subunit	24.4898	25	24	1029	115.1	5.4	0.979	1.019	1.014	1.004	1.005	1.018	1.01	1.011	0.987	0.962	1.007	0.985333	1.00697	0.622451	0.974613	0.131247	0.981408	0.360779
E2RGT2	Uncharacterized protein	24.4681	4	4	188	21.2	9.74	0.933	0.956	0.871	0.92	1.034	1.019	1.115	1.056	1.01	1.041	1.019	1.02333	1.14783	0.0255109	0.969066	0.354265	1.11232	0.0186681
F1PR49	Uncharacterized protein	24.4444	8	8	360	41	7.75	1.021	0.99	0.973	0.994667	1.04	0.975	1.044	1.01967	1.017	0.948	0.993	0.986	1.02513	0.397459	0.966983	0.326715	0.991287	0.742649
E2RMQ3	Uncharacterized protein	24.4444	4	4	225	25.6	9.79	0.99	0.968	0.897	0.951667	1.106	1.171	0.989	1.08867	0.932	0.989	0.957	0.959333	1.14396	0.0851514	0.8812	0.0811305	1.00806	0.825365
E2RK29	Uncharacterized protein	24.4318	4	3	176	20.7	6.34	0.976	1	0.923	0.966333	1.044	1.021	0.99	1.01833	1.056	0.977	1.012	1.015	1.05381	0.132745	0.996727	0.910008	1.05036	0.205739
A0A0A0RDI7	Transferrin receptor protein 1	24.4156	18	18	770	86.5	6.3	1.147	1.216	1.177	1.18	0.907	1.02	0.914	0.947	0.808	0.903	0.908	0.873	0.802542	0.00501398	0.921859	0.205024	0.739831	0.00129784
J9PB32	Uncharacterized protein	24.4083	13	12	676	74.9	5.14	0.937	1.023	0.968	0.976	0.987	1.075	1.004	1.022	1.045	0.962	1.002	1.003	1.04713	0.280111	0.981409	0.626175	1.02766	0.480407
E2RHY0	Uncharacterized protein	24.4019	15	15	836	92.7	9.16	1.039	1.131	1.052	1.074	0.965	0.999	0.979	0.981	1.016	0.897	0.922	0.945	0.913408	0.0376575	0.963303	0.391939	0.879888	0.0493399
E2RF52	Proteasome subunit alpha type	24.4	4	1	250	27.9	8.87	1.493	0.732	0.972	1.06567	1.622	0.772	0.765	1.053	0.93	0.8	0.914	0.881333	0.988114	0.973799	0.836974	0.582515	0.827025	0.464732
E2QS43	Uncharacterized protein	24.3961	9	9	414	44.6	6.7	1.017	0.945	1.058	1.00667	0.904	1	0.969	0.957667	1.024	1.052	1.031	1.03567	0.951325	0.322833	1.08145	0.0573942	1.02881	0.442765
F1PBG0	Uncharacterized protein	24.3902	7	7	328	37.2	6.92	0.979	1.018	0.974	0.990333	1.01	1.029	1.002	1.01367	0.997	0.998	0.993	0.996	1.02356	0.219642	0.982572	0.0960968	1.00572	0.706207
E2RBB4	RNA cytidine acetyltransferase	24.3902	19	19	1025	115.7	8.32	0.952	0.984	1.057	0.997667	0.987	0.929	1.014	0.976667	1	1.034	1.044	1.026	0.978951	0.626733	1.05051	0.157284	1.0284	0.449114
J9P1C8	Uncharacterized protein	24.359	1	1	78	8.5	9.25	0.916	0.911	1.223	1.01667	1.038	1.192	0.861	1.03033	0.91	0.94	1.009	0.953	1.01344	0.927281	0.924943	0.482563	0.937377	0.584731
E2RAG6	Uncharacterized protein	24.2888	9	9	457	51.9	6.21	0.941	0.993	0.927	0.953667	0.993	1.177	0.964	1.04467	1.016	1.006	0.982	1.00133	1.09542	0.261433	0.958519	0.555568	1.04998	0.101186
F6V9R9	Uncharacterized protein	24.2833	23	23	1186	134.9	6.95	1.198	1.138	1.251	1.19567	0.774	0.715	0.766	0.751667	1.045	1.031	1.081	1.05233	0.628659	0.000291577	1.4	0.000223534	0.880123	0.0161969
E2QX76	Uncharacterized protein	24.2424	10	10	462	54	7.01	0.982	1.044	0.953	0.993	1.039	1.113	1.039	1.06367	0.94	0.938	0.951	0.943	1.07116	0.124577	0.886556	0.00847651	0.949648	0.139244
E2RRZ8	Uncharacterized protein	24.2331	5	5	326	36.9	5.97	1.062	1.038	0.991	1.03033	1.018	0.964	0.974	0.985333	1.028	0.966	0.96	0.984667	0.956325	0.166497	0.999323	0.981715	0.955678	0.204069
E2RFY9	Adenylate kinase 4, mitochondrial	24.2152	5	5	223	25.4	8.4	0.952	0.935	0.92	0.935667	1.001	1.117	0.994	1.03733	1.045	1.022	1.014	1.027	1.10866	0.0679772	0.990039	0.813225	1.09761	0.00222936
E2RKQ0	Protein phosphatase methylesterase 1	24.2105	7	7	380	41.7	5.97	0.95	0.955	0.913	0.939333	1.296	1.012	0.954	1.08733	0.927	0.993	1	0.973333	1.15756	0.236959	0.895156	0.351487	1.0362	0.272793
J9NVS3	Uncharacterized protein	24.2009	6	5	219	25.3	8.84	0.958	0.946	1.009	0.971	0.954	0.98	1.018	0.984	1.036	1.054	1.045	1.045	1.01339	0.653012	1.06199	0.0341419	1.07621	0.0208354
E2R436	Uncharacterized protein	24.1883	14	14	616	68.4	7.74	1.09	0.976	1.056	1.04067	0.971	0.929	0.999	0.966333	0.998	1.015	0.966	0.993	0.928571	0.13256	1.0276	0.344545	0.954196	0.264002
E2RB92	Uncharacterized protein	24.186	9	9	430	48.4	10.02	0.904	1	0.9	0.934667	1.054	1.063	1.034	1.05033	1.032	1.02	0.993	1.015	1.12375	0.0267086	0.96636	0.069756	1.08595	0.081348
F1P6A4	Cytochrome c oxidase subunit 5A, mitochondrial	24.183	4	3	153	16.7	7.39	0.97	0.987	0.97	0.975667	1.009	1.077	1.028	1.038	0.975	1.013	0.972	0.986667	1.06389	0.0414143	0.950546	0.100957	1.01127	0.486384
F1P661	Uncharacterized protein	24.1445	11	10	526	60.5	6.24	1.02	1.049	1.011	1.02667	0.966	1.034	0.983	0.994333	0.962	1.018	0.958	0.979333	0.968506	0.239675	0.984915	0.622387	0.953896	0.103295
E2RCM6	Uncharacterized protein (Fragment)	24.1379	9	1	464	50.2	8.98	1.007	0.834	0.705	0.848667	1.251	0.441	1.102	0.931333	1.188	1.274	1.197	1.21967	1.09741	0.769693	1.30959	0.313679	1.43716	0.0154986
F1PF82	Uncharacterized protein	24.1192	8	8	369	41.4	4.98	0.97	0.901	0.991	0.954	1.031	0.861	1.052	0.981333	1.059	1.076	1.06	1.065	1.02865	0.701284	1.08526	0.240304	1.11635	0.0161047
E2RDX2	Uncharacterized protein	24.1071	5	5	224	25	4.78	1.079	1.054	1.012	1.04833	1.045	0.987	0.993	1.00833	0.965	0.941	0.922	0.942667	0.961844	0.21061	0.934876	0.041769	0.899205	0.0103363
F1PVV5	Uncharacterized protein	24.1058	13	13	643	70.3	6.58	1.038	1.014	0.988	1.01333	0.968	0.981	0.988	0.979	1.041	0.979	1.003	1.00767	0.966118	0.0922927	1.02928	0.205403	0.994408	0.81839
F1PWR0	Uncharacterized protein	24.0741	8	1	432	47.4	8.19	1.016	0.944	1.075	1.01167	0.95	0.8	0.923	0.891	1.123	1.092	1.078	1.09767	0.880725	0.113402	1.23195	0.0126253	1.08501	0.0988346
E2R798	Uncharacterized protein	24.0741	5	5	216	25.4	11.3	0.955	0.991	0.928	0.958	1.091	1.073	1.014	1.05933	0.98	0.987	0.98	0.982333	1.10578	0.0265822	0.927313	0.0300846	1.0254	0.256491
E2RIH2	Uncharacterized protein	24.0356	8	4	337	39	8.4	1.094	1.071	1.017	1.06067	1.21	0.978	0.997	1.06167	0.933	0.872	0.827	0.877333	1.00094	0.990359	0.826374	0.0837721	0.827153	0.00870437
F1PZP6	Uncharacterized protein	23.9796	27	27	1176	134.1	7.21	1.085	0.979	1.014	1.026	0.921	0.925	0.989	0.945	1.025	1.039	1.022	1.02867	0.921053	0.101164	1.08854	0.020931	1.0026	0.936841
J9P692	Uncharacterized protein	23.97	4	4	267	29.1	9.04	1.004	1.035	0.973	1.004	0.98	0.98	0.994	0.984667	1.035	0.98	1.02	1.01167	0.980744	0.354908	1.02742	0.188775	1.00764	0.768022
J9P1Y9	Protein yippee-like	23.9669	3	3	121	13.8	7.31	0.933	1.069	0.905	0.969	0.895	1.105	0.949	0.983	1.1	0.995	1.049	1.048	1.01445	0.870863	1.06612	0.404929	1.08153	0.251794
Q28294	Guanine nucleotide-binding protein G(q) subunit alpha	23.9554	7	6	359	42.1	5.68	0.94	0.977	1.07	0.995667	0.981	0.98	0.987	0.982667	0.977	1.062	1.025	1.02133	0.986943	0.754013	1.03935	0.192571	1.02578	0.605372
E2R341	Uncharacterized protein	23.9521	4	2	167	19.1	8.37	1.009	1.052	0.913	0.991333	1.093	1.086	1.075	1.08467	0.926	0.947	0.899	0.924	1.09415	0.0873178	0.851875	0.00041373	0.932078	0.195504
F1Q1M2	Uncharacterized protein	23.9362	18	18	940	105.6	6.84	0.966	0.997	0.972	0.978333	0.981	1.091	0.982	1.018	1.017	1.004	0.99	1.00367	1.04055	0.352259	0.98592	0.720504	1.02589	0.108163
E2RT60	Integrin beta	23.9348	19	19	798	88.1	5.38	1.094	1.019	1.07	1.061	0.94	0.995	0.952	0.962333	0.877	1.041	1.011	0.976333	0.907006	0.0235682	1.01455	0.805104	0.920201	0.198889
E2RHF5	Uncharacterized protein	23.9044	5	5	251	26.5	11.66	0.854	0.996	0.947	0.932333	0.972	1.013	1.037	1.00733	1.123	1.011	1.047	1.06033	1.08044	0.176579	1.05261	0.236353	1.13729	0.0736569
E2RA22	Uncharacterized protein	23.8938	4	4	226	24.5	6.1	0.971	1.014	0.947	0.977333	1.028	1.056	1.049	1.04433	0.978	0.936	1.021	0.978333	1.06855	0.0348011	0.936802	0.0636879	1.00102	0.976123
F1PBB6	Uncharacterized protein	23.8727	7	7	377	43	8.02	1.066	1.059	0.871	0.998667	1.02	1.1	0.977	1.03233	0.979	0.953	0.975	0.969	1.03371	0.670003	0.93865	0.161535	0.970294	0.668854
F1PSR3	Uncharacterized protein	23.8596	5	5	285	30.3	8.4	0.905	0.96	0.879	0.914667	1.044	1.077	1.024	1.04833	1.089	1.011	1.011	1.037	1.14614	0.00930984	0.989189	0.726893	1.13375	0.0256886
F1P835	Polypeptide N-acetylgalactosaminyltransferase	23.8274	12	12	533	60.7	7.46	0.959	0.944	0.935	0.946	1.058	1.029	1.015	1.034	1.012	1.045	1.004	1.02033	1.09302	0.00369336	0.986783	0.48603	1.07858	0.00663609
J9NWA9	Uncharacterized protein	23.8095	2	2	147	16.8	5.54	0.992	0.926	0.981	0.966333	1.043	0.998	0.971	1.004	1.044	1.053	0.992	1.02967	1.03898	0.26781	1.02556	0.416142	1.06554	0.0857006
J9P7R7	Uncharacterized protein	23.8095	16	16	651	73.5	5.4	0.977	1.011	0.973	0.987	1.039	0.995	0.999	1.011	1.035	0.972	1	1.00233	1.02432	0.264539	0.991428	0.72556	1.01554	0.521524
F1PFK6	Importin subunit alpha	23.7918	11	3	538	60.2	4.97	1.09	1.104	1.039	1.07767	1.078	1.035	1.023	1.04533	0.887	0.842	0.901	0.876667	0.969997	0.27938	0.838648	0.00229918	0.813486	0.00164072
E2RGP6	Uncharacterized protein	23.7852	7	7	391	44.1	6.46	0.96	0.949	0.986	0.965	1.021	1.248	0.96	1.07633	0.994	0.925	0.957	0.958667	1.11537	0.275915	0.890678	0.260534	0.993437	0.794554
F2Z4N6	Uncharacterized protein	23.7805	4	3	164	19.3	11.65	1.013	0.992	0.953	0.986	1.024	0.902	1.02	0.982	1.031	1.023	1.042	1.032	0.995943	0.931481	1.05092	0.283476	1.04665	0.0669703
E2RPZ5	Uncharacterized protein	23.7785	4	4	307	33.6	6.01	0.946	0.981	1.049	0.992	1.027	0.959	0.992	0.992667	0.997	1.016	1.033	1.01533	1.00067	0.986132	1.02283	0.365282	1.02352	0.505996
F1PL89	Uncharacterized protein	23.766	10	3	547	64.2	6.62	1.044	1.072	1.016	1.044	1.017	0.997	0.974	0.996	0.957	0.963	0.959	0.959667	0.954023	0.0781444	0.963521	0.0443122	0.919221	0.00657913
E2R8W3	Uncharacterized protein	23.764	12	12	627	70.8	6.47	1.026	1.025	0.934	0.995	1.03	1.009	1.023	1.02067	0.987	0.993	0.973	0.984333	1.0258	0.455846	0.964402	0.0131998	0.98928	0.748662
J9NYU7	Uncharacterized protein	23.7636	15	14	829	92.9	6.02	0.906	1.024	1.022	0.984	1.037	1.047	0.995	1.02633	0.985	1.013	0.971	0.989667	1.04302	0.371855	0.964274	0.143004	1.00576	0.896531
J9P6P2	Peptidylprolyl isomerase	23.6786	9	9	473	50.5	5.19	1.085	1.068	1.227	1.12667	0.977	0.845	1.01	0.944	0.936	0.929	0.923	0.929333	0.83787	0.0624773	0.984463	0.78612	0.824852	0.0174816
F6UV54	Uncharacterized protein	23.6686	9	9	507	55.5	7.02	0.995	0.89	0.972	0.952333	1.029	0.87	1.04	0.979667	1.048	1.067	1.088	1.06767	1.0287	0.689049	1.08983	0.191982	1.12111	0.0272111
E2RL19	Uncharacterized protein	23.6607	5	5	224	25.5	9.58	0.469	0.472	0.472	0.471	1.525	1.8	1.917	1.74733	0.752	0.791	0.802	0.781667	3.70984	0.000390236	0.447348	0.00118208	1.65959	3.3862e-05
F1PHM4	Uncharacterized protein	23.6486	6	6	296	34.2	6.28	0.94	1.071	0.955	0.988667	1.044	1.119	0.984	1.049	0.985	0.948	0.954	0.962333	1.06102	0.348826	0.917382	0.100272	0.973365	0.572965
E2RD70	Uncharacterized protein	23.6407	7	7	423	47.9	6.65	1.049	0.938	1.123	1.03667	0.911	0.94	1.028	0.959667	0.977	1.028	1.007	1.004	0.925723	0.296867	1.0462	0.309963	0.968489	0.589438
E2QSC8	Tetraspanin	23.6287	5	5	237	25.8	5.97	1.036	1.002	1.002	1.01333	1.114	1.013	0.969	1.032	0.901	1.004	0.958	0.954333	1.01842	0.69574	0.924742	0.21134	0.941776	0.137814
E2RD37	Uncharacterized protein	23.6111	5	5	288	33.6	11.25	0.909	0.999	0.89	0.932667	0.904	0.969	1.004	0.959	1.185	1.044	1.096	1.10833	1.02823	0.58658	1.15572	0.0417431	1.18835	0.0297899
F1PQX4	Uncharacterized protein	23.609	12	12	665	75.9	6.35	1.016	1.019	0.994	1.00967	1.023	0.96	1.005	0.996	1.015	0.991	0.977	0.994333	0.986464	0.538171	0.998327	0.942662	0.984813	0.322904
F1PBJ4	Uncharacterized protein	23.5977	9	7	517	52.6	9.31	0.963	0.956	0.956	0.958333	0.972	0.991	1.024	0.995667	1.038	1.052	1.049	1.04633	1.03896	0.0720549	1.05089	0.0325398	1.09183	5.44066e-05
E2RME9	Uncharacterized protein	23.5915	10	10	568	63.4	9.1	0.93	0.967	0.964	0.953667	1.059	1.059	1.009	1.04233	0.982	1.035	0.996	1.00433	1.09297	0.0123114	0.963543	0.173914	1.05313	0.0627491
F1PYG1	Uncharacterized protein	23.588	6	6	301	34	7.49	1.015	1.055	0.967	1.01233	0.978	0.985	1.033	0.998667	1.005	0.992	0.97	0.989	0.9865	0.67976	0.99032	0.655341	0.976951	0.442619
E2RPS7	Uncharacterized protein	23.5585	12	12	607	66.4	5.22	0.941	1.012	0.964	0.972333	0.975	1.075	1.032	1.02733	1.017	0.985	0.998	1	1.05656	0.198503	0.973394	0.419639	1.02845	0.293279
F1PN67	Uncharacterized protein	23.535	21	21	1058	112	6.67	1.052	1.055	0.987	1.03133	0.997	0.979	0.977	0.984333	1.011	0.965	0.976	0.984	0.954428	0.111368	0.999661	0.983616	0.954105	0.144674
F1PDH7	Uncharacterized protein	23.5294	4	4	153	17	10.39	1.066	1.005	1.01	1.027	1.061	0.901	1.034	0.998667	0.983	0.947	0.992	0.974	0.972412	0.622388	0.9753	0.655917	0.948393	0.0908813
F1PBM2	Uncharacterized protein	23.5294	5	5	306	33.8	6.29	1.059	0.931	1.006	0.998667	1.042	0.927	0.986	0.985	1.021	1.005	1.022	1.016	0.986315	0.797386	1.03147	0.40912	1.01736	0.668254
F1PEV7	Uncharacterized protein	23.5294	15	15	799	87.2	5.29	0.95	0.947	0.918	0.938333	1.082	1.128	1.072	1.094	0.971	0.959	0.973	0.967667	1.1659	0.0014795	0.884522	0.00207655	1.03126	0.0574294
J9NTS2	Uncharacterized protein	23.5294	4	4	187	21.9	9.92	0.909	1.014	0.913	0.945333	1.068	0.993	1.065	1.042	1.052	1.034	0.952	1.01267	1.10226	0.0838105	0.971849	0.497381	1.07123	0.218095
J9P4C8	Uncharacterized protein	23.5294	2	2	85	9.8	6.81	0.902	1.051	0.977	0.976667	1.083	1.228	1.009	1.10667	0.897	0.929	0.925	0.917	1.13311	0.168229	0.828614	0.0435284	0.938908	0.24815
E2RLA8	Uncharacterized protein	23.5043	5	5	234	26.1	7.28	0.969	1.102	0.944	1.005	0.998	1.114	1.015	1.04233	1.028	0.902	0.928	0.952667	1.03715	0.57318	0.913975	0.164424	0.947927	0.448073
E2RIA5	Uncharacterized protein	23.4513	5	1	226	25.7	5.12	0.986	1.011	1.07	1.02233	0.987	1.031	0.905	0.974333	0.977	0.947	1.085	1.003	0.953049	0.341767	1.02942	0.634799	0.981089	0.711898
E2QY93	Nicalin	23.4458	13	13	563	63.1	6.37	0.919	1.021	0.959	0.966333	1.028	1.085	0.997	1.03667	0.993	0.981	1.017	0.997	1.07278	0.148017	0.961736	0.227592	1.03174	0.385452
E2RS54	Uncharacterized protein	23.445	12	12	627	72	9.31	1.01	0.926	1.006	0.980667	1.034	0.881	1.041	0.985333	1.007	1.048	1.046	1.03367	1.00476	0.940695	1.04905	0.420437	1.05404	0.156624
E2RTI3	Uncharacterized protein	23.435	10	5	623	65.5	5.22	0.995	0.962	0.944	0.967	1.008	1.102	1.038	1.04933	0.976	0.991	0.984	0.983667	1.08514	0.05912	0.937421	0.0793407	1.01724	0.344144
E2R0B6	Proteasome subunit beta type	23.431	6	6	239	25.5	4.86	1.09	1.015	0.993	1.03267	1.045	1.021	1.016	1.02733	0.956	0.947	0.919	0.940667	0.994835	0.870501	0.915639	0.00373302	0.91091	0.0428332
J9NZA0	Uncharacterized protein	23.4234	6	6	111	12.2	3.78	0.827	0.868	0.928	0.874333	0.993	1.077	1.109	1.05967	1.07	1.105	1.023	1.066	1.21197	0.0150145	1.00598	0.887335	1.21921	0.00708883
F1PUT6	Uncharacterized protein	23.3898	12	12	590	64.3	6.07	0.952	0.86	0.945	0.919	1.028	1.04	0.982	1.01667	0.894	1.182	1.117	1.06433	1.10627	0.047103	1.04689	0.620574	1.15814	0.189651
E2REM0	Uncharacterized protein	23.3846	6	6	325	35.3	8.72	0.933	0.994	0.874	0.933667	0.947	1.044	1.006	0.999	1.157	0.919	1.126	1.06733	1.06998	0.217504	1.0684	0.440395	1.14316	0.179862
F1Q2J2	Uncharacterized protein	23.3803	16	16	710	81	8.21	0.99	1.013	0.961	0.988	1.077	1.048	1.06	1.06167	0.971	0.926	0.953	0.95	1.07456	0.0129113	0.894819	0.0019913	0.961538	0.129286
F1PQB2	Uncharacterized protein	23.3393	21	21	1114	122.9	8.69	1.068	1.015	1.041	1.04133	0.952	0.944	0.976	0.957333	1.028	0.982	0.993	1.001	0.919334	0.00967323	1.04561	0.0608377	0.961268	0.122515
F6X571	Uncharacterized protein	23.3333	4	4	210	24.6	5.54	1.025	1.02	1.084	1.043	0.998	0.929	0.944	0.957	0.98	1.03	0.991	1.00033	0.917546	0.0428008	1.04528	0.1692	0.959092	0.170164
J9NVB9	Uncharacterized protein	23.3161	4	3	193	22	5.22	0.997	1.009	0.985	0.997	0.983	0.993	0.995	0.990333	1.029	0.99	1.019	1.01267	0.993313	0.444107	1.02255	0.142854	1.01571	0.313294
D7F605	Tumor necrosis factor receptor superfamily member 12a	23.2558	2	2	129	13.6	8.34	1.011	1.077	1.385	1.15767	0.872	0.665	0.863	0.8	1.032	1.015	1.08	1.04233	0.691045	0.0553804	1.30292	0.0261202	0.900374	0.379635
E2RP40	Uncharacterized protein	23.2236	12	6	577	60.9	6.83	1.024	1.04	0.952	1.00533	1.039	1.05	0.995	1.028	0.973	0.966	0.961	0.966667	1.02255	0.516043	0.940337	0.0232853	0.961538	0.229426
J9NXW2	Uncharacterized protein	23.2082	5	5	293	32.8	7.53	0.899	0.986	1.073	0.986	1.023	1.083	0.976	1.02733	0.957	0.991	1.013	0.987	1.04192	0.522227	0.96074	0.313195	1.00101	0.985798
F1PBJ2	Uncharacterized protein	23.1644	22	21	967	112.3	6.99	0.528	0.528	0.564	0.54	1.808	1.745	1.797	1.78333	0.628	0.698	0.703	0.676333	3.30247	6.81147e-07	0.379252	3.69013e-06	1.25247	0.00725378
J9P9V1	Uncharacterized protein	23.1231	7	7	333	38.2	5.31	0.98	0.999	0.93	0.969667	1.066	1.071	1.092	1.07633	0.944	0.968	0.95	0.954	1.11	0.00843625	0.886343	0.000339396	0.983843	0.512182
E2RPC0	Uncharacterized protein	23.09	9	3	589	62.3	5.11	0.993	0.985	1.031	1.003	0.874	1.122	0.976	0.990667	1.044	0.996	0.978	1.006	0.987704	0.874632	1.01548	0.847213	1.00299	0.90761
J9P0S6	Uncharacterized protein	23.0769	4	4	182	20.3	5.11	1.052	1.103	0.982	1.04567	0.996	0.905	1.004	0.968333	1.051	0.873	1.034	0.986	0.926044	0.177469	1.01824	0.799219	0.942939	0.421472
F1PZJ7	Uncharacterized protein	23.0769	6	6	286	33.5	9.19	0.959	0.946	0.967	0.957333	1.077	0.935	1.053	1.02167	1.027	0.993	1.043	1.021	1.0672	0.220155	0.999347	0.9892	1.0665	0.0162826
F1P9T5	Peptidylprolyl isomerase	23.0392	4	4	204	22.6	9.85	0.905	0.955	1.003	0.954333	1.02	1.041	1.023	1.028	1.008	1.034	1.012	1.018	1.07719	0.0642161	0.990272	0.391076	1.06671	0.0964819
E2RB98	Uncharacterized protein	23.0315	11	11	508	57.2	8.41	1.068	1.055	1.027	1.05	0.935	0.946	0.935	0.938667	0.974	1.03	1.031	1.01167	0.893968	0.000916756	1.07777	0.0190341	0.963492	0.161982
F1P620	Uncharacterized protein	23.0233	10	5	430	46.5	6.44	0.954	0.971	0.953	0.959333	1.055	1.054	0.947	1.01867	0.959	1.075	1.032	1.022	1.06185	0.177556	1.00327	0.949338	1.06532	0.142222
E2RNC5	Uncharacterized protein	22.9885	4	4	174	19.9	8.84	0.944	0.957	0.903	0.934667	1.038	1.092	1.021	1.05033	0.999	1.036	1.01	1.015	1.12375	0.0126254	0.96636	0.215734	1.08595	0.0149313
E2RJK8	Uncharacterized protein	22.9773	7	6	309	34.6	9.1	0.958	0.982	0.926	0.955333	1.031	1.15	0.997	1.05933	0.951	1.035	0.971	0.985667	1.10886	0.101744	0.930459	0.235807	1.03175	0.37032
E2REA5	Uncharacterized protein	22.973	5	5	222	25.7	7.27	1.004	0.93	1.005	0.979667	1.1	0.992	1.072	1.05467	0.979	0.94	0.977	0.965333	1.07656	0.139817	0.915297	0.0619528	0.985369	0.63433
F1PCM9	Uncharacterized protein	22.9508	7	7	305	33.9	6.39	1.022	1.014	0.984	1.00667	1.031	0.98	1.034	1.015	0.983	0.959	0.992	0.978	1.00828	0.711689	0.963547	0.139466	0.971523	0.132202
E2R1V2	Uncharacterized protein	22.9381	16	16	776	89.6	8	1.075	0.957	1.064	1.032	1.048	0.855	1.011	0.971333	0.988	1.005	0.997	0.996667	0.941214	0.435611	1.02608	0.691427	0.965762	0.404568
H9GWC8	Uncharacterized protein	22.935	22	22	1138	126.6	6.71	0.985	1.068	1.006	1.01967	0.951	0.955	0.979	0.961667	1.068	0.955	1.033	1.01867	0.943119	0.0930091	1.05927	0.174075	0.999019	0.982003
E2QVB5	Peptidyl-prolyl cis-trans isomerase E	22.9236	7	5	301	33.4	5.6	1.069	0.949	1.095	1.03767	0.983	0.787	1.056	0.942	1.032	0.972	1.057	1.02033	0.907806	0.357335	1.08316	0.404769	0.983296	0.753608
J9P555	Uncharacterized protein	22.9167	1	1	48	5.7	11.27	0.952	0.953	0.857	0.920667	1.189	1.115	1.097	1.13367	0.899	1.004	0.935	0.946	1.23135	0.00742578	0.83446	0.0108466	1.02752	0.598016
Q6UQF0	High mobiliy group protein A1B	22.9167	3	1	96	10.6	10.32	0.846	0.943	0.88	0.889667	0.921	1.071	1.031	1.00767	1.142	0.989	1.179	1.10333	1.13263	0.0903469	1.09494	0.262621	1.24016	0.0299038
J9P4N5	Uncharacterized protein	22.8916	2	2	83	9.3	5.12	1.08	1	0.999	1.02633	1.066	1.009	0.993	1.02267	0.907	0.993	0.955	0.951667	0.996427	0.921154	0.930574	0.100076	0.927249	0.110902
F1PLC9	Uncharacterized protein	22.8814	2	2	118	13.6	5.6	1.045	1.299	1.001	1.115	1.105	1.251	1.147	1.16767	0.775	0.662	0.716	0.717667	1.04723	0.634493	0.614616	0.00115693	0.643647	0.0156509
F1PB77	Alpha-1,4 glucan phosphorylase	22.8736	16	14	870	99.9	7.23	0.956	0.966	0.986	0.969333	1.078	1.053	1.111	1.08067	0.96	0.939	0.951	0.95	1.11486	0.00420992	0.879087	0.00185828	0.980055	0.14546
F1PPG5	Integrin beta	22.8717	15	15	787	86.9	5.36	1.132	1.106	1.163	1.13367	0.888	0.826	0.877	0.863667	0.966	1.008	1.033	1.00233	0.761835	0.000431578	1.16056	0.00711086	0.884152	0.00680406
E2RBI2	Uncharacterized protein	22.8614	15	11	678	74.8	8.27	0.982	1.017	0.927	0.975333	1.002	1.032	1.003	1.01233	1.029	0.983	1.025	1.01233	1.03794	0.256589	1	1	1.03794	0.285559
E2RBF6	BRCA2 and CDKN1A-interacting protein	22.8571	6	6	315	35.7	4.51	1.132	1.006	0.948	1.02867	0.912	0.968	1.031	0.970333	1.001	1.021	0.981	1.001	0.943292	0.41544	1.0316	0.44532	0.973104	0.644447
E2R5X8	Uncharacterized protein	22.8571	4	4	210	23.7	6.87	0.989	0.944	0.999	0.977333	1.057	0.849	1.07	0.992	1.022	1.015	1.056	1.031	1.01501	0.851706	1.03931	0.620136	1.05491	0.063986
J9P7P6	Uncharacterized protein	22.8522	19	18	1164	125.4	7.08	1.064	1.001	1.069	1.04467	0.862	0.873	0.9	0.878333	1.142	1.016	1.073	1.077	0.840779	0.00250368	1.22619	0.00647488	1.03095	0.489111
E2R3E1	Uncharacterized protein	22.8438	7	7	429	48.3	10.01	0.986	1.005	0.971	0.987333	1.026	1.064	0.99	1.02667	0.98	0.989	0.99	0.986333	1.03984	0.169785	0.960714	0.135254	0.998987	0.927598
O97758	Tight junction protein ZO-1	22.8378	32	32	1769	197.5	6.77	0.996	1.096	0.988	1.02667	0.949	1.013	0.99	0.984	1.034	0.953	0.981	0.989333	0.958442	0.340462	1.00542	0.868574	0.963636	0.425156
J9P558	Uncharacterized protein	22.8346	2	1	127	14.4	5.69	1.037	1.019	0.955	1.00367	0.929	0.935	1.071	0.978333	1.044	0.984	1.027	1.01833	0.974759	0.655359	1.04089	0.465904	1.01461	0.657005
J9NW75	Uncharacterized protein	22.833	9	9	473	52.8	7.06	0.773	0.832	0.793	0.799333	1.206	1.313	1.289	1.26933	0.922	0.933	0.94	0.931667	1.58799	0.000215525	0.733981	0.000504336	1.16555	0.00186097
F1Q154	Uncharacterized protein	22.8324	13	13	692	77.8	8.6	0.933	1.028	0.926	0.962333	1.043	0.981	1.039	1.021	1.037	1.014	0.999	1.01667	1.06096	0.202378	0.995756	0.859	1.05646	0.192472
E2R5B2	Uncharacterized protein	22.8111	7	0	434	47	7.72	1.049	1.092	1.097	1.07933	1.062	0.79	1.007	0.953	0.995	0.956	0.953	0.968	0.882952	0.208858	1.01574	0.867152	0.89685	0.00545436
F1PRS5	Cation-transporting ATPase	22.8027	22	22	1206	133.1	8.27	1.027	0.963	1.016	1.002	1.036	0.985	1	1.007	0.983	1.006	0.982	0.990333	1.00499	0.850569	0.983449	0.383472	0.988357	0.612281
E2QXE6	Uncharacterized protein	22.7979	4	2	193	21.4	8.53	1.221	1.038	1.066	1.10833	1.122	1.085	0.955	1.054	0.805	0.846	0.862	0.837667	0.950977	0.5151	0.79475	0.0154686	0.755789	0.0103575
F1PNS6	Uncharacterized protein	22.7979	7	7	386	43.2	5.66	0.983	1.006	0.994	0.994333	1.024	0.957	0.993	0.991333	1.047	0.993	1.004	1.01467	0.996983	0.890555	1.02354	0.410619	1.02045	0.316194
E2RR30	Uncharacterized protein	22.7979	8	8	579	62.7	7.44	0.931	0.966	1.054	0.983667	1.057	0.971	0.998	1.00867	0.985	1.022	1.016	1.00767	1.02542	0.604531	0.999009	0.973088	1.0244	0.565309
F1PR18	Uncharacterized protein	22.7941	18	16	952	103.6	6.73	1.196	1.051	0.955	1.06733	0.939	0.987	1.009	0.978333	0.965	0.959	0.941	0.955	0.916615	0.289944	0.97615	0.34649	0.894753	0.185892
F1PSQ8	Uncharacterized protein	22.7941	9	5	544	60.1	6.18	0.997	0.986	0.971	0.984667	1.074	0.945	1.012	1.01033	1.011	0.999	1.006	1.00533	1.02607	0.536461	0.995051	0.900132	1.02099	0.0674859
E2R4T2	Uncharacterized protein	22.7799	5	5	259	29.9	10.27	1.019	1.125	0.668	0.937333	1.104	1.005	1.13	1.07967	1.03	0.934	0.984	0.982667	1.15185	0.376667	0.910157	0.108529	1.04836	0.763687
E2RAM9	Sulfotransferase	22.7723	6	6	303	35.4	7.37	0.995	1.026	1.022	1.01433	1.009	0.996	1.061	1.022	1.011	0.963	0.916	0.963333	1.00756	0.746316	0.942596	0.158189	0.949721	0.154565
E2R1N7	Uncharacterized protein	22.7723	10	10	505	56.7	6.54	0.952	0.901	1.004	0.952333	0.98	0.934	0.974	0.962667	1.036	1.111	1.109	1.08533	1.01085	0.770189	1.12742	0.0127363	1.13966	0.0262405
F1PIR1	Uncharacterized protein	22.7626	10	10	514	58.6	6.19	0.933	0.988	0.936	0.952333	1.009	1.017	1.004	1.01	1.032	1.046	1.035	1.03767	1.06055	0.0341976	1.02739	0.00829603	1.0896	0.00966746
F1PBC7	Uncharacterized protein	22.7513	8	8	378	41.2	6.77	0.986	0.936	0.846	0.922667	0.903	1.051	0.98	0.978	0.975	1.152	1.172	1.09967	1.05997	0.402833	1.1244	0.183726	1.19184	0.0771573
E2R1P9	Methionine aminopeptidase 2	22.7459	9	9	488	54.1	6.02	1.044	0.988	0.955	0.995667	0.932	1.027	1.031	0.996667	0.975	1.028	1.021	1.008	1.001	0.981926	1.01137	0.770929	1.01239	0.709657
E2RB82	Signal transducer and activator of transcription	22.7273	13	13	770	88	6.3	1.269	1.332	1.235	1.27867	1.014	0.973	1.049	1.012	0.754	0.664	0.709	0.709	0.791449	0.00175605	0.700593	0.000878322	0.554484	0.000121482
F1PG47	Uncharacterized protein	22.7273	3	3	154	17.4	5.1	1.023	0.994	0.956	0.991	1.1	1.086	1.102	1.096	0.938	0.884	0.918	0.913333	1.10595	0.00634417	0.833333	0.000382754	0.921628	0.0359686
E2RJE9	Uncharacterized protein	22.7188	9	9	537	60.7	7.75	1.005	0.902	1.075	0.994	1.01	0.915	1.016	0.980333	0.986	1.057	1.035	1.026	0.986251	0.830861	1.04658	0.305156	1.03219	0.588304
E2QYT6	Uncharacterized protein	22.7184	8	8	515	57.1	9.11	1.086	1.023	0.957	1.022	0.947	0.95	0.994	0.963667	1.026	1.021	0.995	1.014	0.942922	0.220585	1.05223	0.0488046	0.992172	0.845393
E2QZV5	Uncharacterized protein	22.7184	11	11	515	57.2	9.33	1.042	1.021	1.001	1.02133	0.976	1.176	0.999	1.05033	0.981	0.898	0.906	0.928333	1.02839	0.675268	0.883846	0.149461	0.908943	0.0325601
J9NXW0	Uncharacterized protein	22.7171	9	9	449	49.6	4.93	1.072	1.043	1.013	1.04267	1.012	0.953	0.974	0.979667	0.994	0.966	0.973	0.977667	0.939578	0.0602009	0.997958	0.922077	0.93766	0.0267414
E2QSB5	Uncharacterized protein	22.7129	4	4	317	34.7	9	1.31	1.219	1.263	1.264	0.777	0.91	0.961	0.882667	0.876	0.859	0.825	0.853333	0.698312	0.00330141	0.966767	0.63313	0.675105	0.000170448
E2R7N5	Coronin	22.6994	10	10	489	54.2	6.19	1.112	0.971	1.132	1.07167	0.996	0.809	0.982	0.929	1.022	0.991	0.985	0.999333	0.866874	0.14382	1.07571	0.314634	0.932504	0.236181
E2QSD6	Uncharacterized protein	22.6804	6	6	388	42.7	5.33	1.076	1.046	0.99	1.03733	1.045	1.012	0.978	1.01167	0.955	0.949	0.948	0.950667	0.975257	0.464435	0.939703	0.0350559	0.916452	0.0266307
E2RNH9	Uncharacterized protein	22.6804	5	5	291	31.9	5.19	0.922	0.982	0.963	0.955667	1.033	1.025	1.002	1.02	1.033	1.008	1.032	1.02433	1.06732	0.0323554	1.00425	0.74385	1.07185	0.0244171
J9P3N4	Galectin	22.6744	3	3	172	19	5.8	1.021	1.011	0.923	0.985	1.142	1.098	0.956	1.06533	1.001	0.913	0.935	0.949667	1.08156	0.278887	0.891427	0.135707	0.964129	0.435819
J9P0Z3	NADH dehydrogenase [ubiquinone] 1 alpha subcomplex subunit 8	22.6744	4	4	172	20.1	7.64	0.993	1.046	0.869	0.969333	1.002	0.956	1.102	1.02	1.084	0.952	0.996	1.01067	1.05227	0.496915	0.99085	0.879941	1.04264	0.5608
F6V322	Uncharacterized protein	22.6415	10	10	530	59.6	5	1.041	1	1.07	1.037	1.002	0.911	0.978	0.963667	1	0.981	1.017	0.999333	0.929283	0.0970044	1.03701	0.288226	0.963677	0.174065
E2RP90	Uncharacterized protein	22.6415	5	4	212	23.2	5.64	0.935	0.964	0.93	0.943	0.978	1.09	1.024	1.03067	1.03	1.014	1.037	1.027	1.09297	0.0623537	0.996442	0.917399	1.08908	0.00262755
F1Q212	RNA-binding protein 47	22.6351	11	11	592	63.5	8.05	1.028	1.058	1.079	1.055	0.965	0.953	0.988	0.968667	1.052	0.929	0.948	0.976333	0.918167	0.00869242	1.00791	0.855863	0.925434	0.127416
F6Y1C9	DNA polymerase	22.6312	25	25	1467	166.6	6	1.046	1.039	1.077	1.054	1.035	0.923	0.98	0.979333	0.968	0.962	0.97	0.966667	0.929159	0.0955965	0.987066	0.715952	0.917141	0.00184747
E2RAV1	Cell division cycle protein 123 homolog	22.619	6	5	336	39.1	4.92	1.019	1.149	1.051	1.073	1.069	1.056	1.126	1.08367	0.83	0.845	0.854	0.843	1.00994	0.822833	0.777914	0.000440952	0.785648	0.00442424
J9P9Z6	Uncharacterized protein	22.5806	5	5	217	25.2	6.32	1.134	1.079	1.082	1.09833	1.074	1.042	1.023	1.04633	0.852	0.874	0.842	0.856	0.952656	0.0888914	0.818095	0.000417401	0.779363	0.00027682
E2R2P0	Uncharacterized protein	22.5806	9	9	527	53.7	5.41	0.98	0.987	0.967	0.978	1.044	1.052	1.002	1.03267	0.982	0.981	1.006	0.989667	1.0559	0.0299936	0.95836	0.0701991	1.01193	0.310483
F1PPP3	Uncharacterized protein	22.5734	11	11	886	97	4.59	0.984	1.022	0.954	0.986667	0.99	1.077	1.004	1.02367	0.979	1.011	0.98	0.99	1.0375	0.329889	0.967112	0.309427	1.00338	0.888428
F1P9J8	Uncharacterized protein	22.5589	6	6	297	32	8.75	0.946	0.996	0.897	0.946333	1.104	1.107	1.084	1.09833	0.996	0.929	0.941	0.955333	1.16062	0.00671387	0.869803	0.00281899	1.00951	0.811042
E2RSG2	Uncharacterized protein	22.5455	4	4	275	29.6	6.38	0.976	0.957	0.922	0.951667	0.962	1.095	0.958	1.005	0.941	1.075	1.112	1.04267	1.05604	0.326247	1.03748	0.612836	1.09562	0.169056
E2RD87	Uncharacterized protein	22.5352	3	3	213	23.9	4.53	0.889	0.909	0.998	0.932	1.086	1.062	0.919	1.02233	0.944	1.118	1.074	1.04533	1.09692	0.21864	1.0225	0.770861	1.1216	0.141828
F1PRA7	DNA topoisomerase 2	22.5343	31	20	1602	181.1	8.02	0.983	1.047	0.984	1.00467	0.966	1.021	0.99	0.992333	1.03	0.983	0.995	1.00267	0.987724	0.665697	1.01041	0.652442	0.998009	0.9411
F1PZE5	Uncharacterized protein	22.5253	25	24	1283	142.2	5.34	1.041	1.042	1.033	1.03867	0.987	0.963	0.977	0.975667	1.006	0.981	0.97	0.985667	0.939345	0.00111063	1.01025	0.475845	0.948973	0.00860311
J9P825	Uncharacterized protein	22.5207	8	8	484	52.7	8.56	0.936	0.973	0.878	0.929	1.023	1.092	1.04	1.05167	1.032	1.006	1.019	1.019	1.13204	0.0238346	0.968938	0.21295	1.09688	0.0347921
E2R6J5	Uncharacterized protein	22.5104	16	15	964	108.5	5.6	0.973	1.004	1.023	1	1.015	0.987	0.987	0.996333	0.992	1.031	0.987	1.00333	0.996333	0.842551	1.00703	0.697469	1.00333	0.876596
E2RQI3	Uncharacterized protein	22.5071	5	5	351	38.5	7.37	0.929	1.098	0.936	0.987667	0.965	1.027	0.969	0.987	1.012	1.022	1.042	1.02533	0.999325	0.991486	1.03884	0.154783	1.03814	0.537382
E2RI87	Signal transducer and activator of transcription	22.5064	24	24	1173	135.4	6.6	1.074	1.051	1.084	1.06967	1.03	0.921	0.978	0.976333	0.976	0.955	0.93	0.953667	0.912745	0.0472541	0.976784	0.543378	0.891555	0.00215651
F1PA11	Uncharacterized protein	22.4932	14	13	738	82.9	9.58	1.076	1.007	0.995	1.026	0.963	0.927	0.988	0.959333	1.055	0.978	1.01	1.01433	0.935023	0.0966239	1.05733	0.125836	0.988629	0.746651
E2QTT0	Uncharacterized protein	22.4932	13	12	738	82.6	9.19	0.977	0.965	1.052	0.998	0.972	0.909	0.984	0.955	1.042	1.053	1.046	1.047	0.956914	0.296022	1.09634	0.0172747	1.0491	0.148358
E2R7T7	Uncharacterized protein	22.488	5	5	209	23.8	7.85	1.014	1.097	0.924	1.01167	1.019	1.11	1.022	1.05033	0.965	0.942	0.907	0.938	1.03822	0.542734	0.89305	0.0305885	0.927183	0.23487
F1PVU3	Non-specific serine/threonine protein kinase	22.4806	14	1	774	86.3	9.79	1.028	0.944	1.076	1.016	1.003	0.918	0.982	0.967667	0.965	1.065	1.02	1.01667	0.952428	0.355233	1.05064	0.273063	1.00066	0.989629
F1Q2D6	Uncharacterized protein	22.4684	6	6	316	33	6.79	0.993	1.015	0.991	0.999667	0.952	1.044	0.99	0.995333	1.053	0.966	0.996	1.005	0.995665	0.883586	1.00971	0.806409	1.00534	0.851134
E2RT32	Uncharacterized protein	22.4638	5	5	276	31.6	5.59	0.959	0.951	0.947	0.952333	1.02	1.026	1.007	1.01767	1.039	1.033	1.016	1.02933	1.0686	0.000593093	1.01146	0.25928	1.08085	0.000573043
F1PXP9	Uncharacterized protein	22.4568	8	5	521	56.7	9.48	1.056	0.973	1.048	1.02567	0.836	0.878	1.051	0.921667	1.062	1.017	1.079	1.05267	0.898603	0.216337	1.14213	0.127745	1.02632	0.449746
J9P0D5	Uncharacterized protein	22.4561	5	5	285	32.6	5.81	0.994	1.026	1.06	1.02667	1.074	0.929	1.018	1.007	0.986	0.97	0.943	0.966333	0.980844	0.692976	0.959616	0.408085	0.941234	0.0573173
E2RMU2	Uncharacterized protein	22.4561	5	4	285	32.7	4.84	0.94	0.987	0.994	0.973667	1.001	1.242	0.913	1.052	0.977	0.998	0.948	0.974333	1.08045	0.476344	0.926172	0.478255	1.00068	0.977589
E2RMQ0	Uncharacterized protein	22.4439	9	9	401	44.9	5.97	0.964	1.011	0.97	0.981667	1.016	1.073	0.999	1.02933	0.979	0.996	0.991	0.988667	1.04856	0.150068	0.960492	0.15095	1.00713	0.67699
J9P2W5	Uncharacterized protein	22.4287	29	29	1507	167.9	6.8	1.02	0.985	0.986	0.997	1.039	1.005	0.977	1.007	0.973	1.009	1.005	0.995667	1.01003	0.663165	0.988745	0.621891	0.998663	0.93832
E2R7M2	Cytochrome c heme lyase	22.4265	4	4	272	31	5.92	0.977	1.077	1.009	1.021	1.017	1.052	1.022	1.03033	0.946	0.953	0.948	0.949	1.00914	0.781381	0.921061	0.00186226	0.929481	0.071524
E2R8E5	Uncharacterized protein	22.4265	6	5	272	31.2	11.59	0.94	0.976	0.918	0.944667	1.06	1.12	1.044	1.07467	0.954	0.999	0.989	0.980667	1.13761	0.0105184	0.912531	0.0248916	1.03811	0.172814
E2RNC2	Claudin	22.381	4	3	210	22.1	8.29	1.251	1.092	1.159	1.16733	0.975	1.024	0.905	0.968	0.809	0.987	0.798	0.864667	0.82924	0.0257864	0.893251	0.215599	0.74072	0.0168382
F1PLQ3	Uncharacterized protein	22.3684	9	9	456	52.3	7.21	0.955	0.961	0.97	0.962	1.087	0.955	1.009	1.017	1.055	1.009	1	1.02133	1.05717	0.226937	1.00426	0.922662	1.06168	0.0279207
F1PSB7	Tyrosine-protein kinase	22.366	12	6	541	60.6	6.8	0.997	1.066	0.975	1.01267	1.027	1.047	1.006	1.02667	0.968	0.937	0.976	0.960333	1.01382	0.663574	0.93539	0.0167728	0.948321	0.154767
F1P7V2	Uncharacterized protein	22.3618	6	6	398	43.6	9.04	0.963	1.055	1.065	1.02767	0.969	0.904	0.993	0.955333	1.063	1.009	0.98	1.01733	0.929614	0.159818	1.0649	0.16041	0.989945	0.811472
E2RBM2	Uncharacterized protein	22.3433	6	6	367	41.8	7.05	0.982	1.012	0.934	0.976	1.037	1.045	0.932	1.00467	0.984	1.023	1.053	1.02	1.02937	0.540683	1.01526	0.730662	1.04508	0.219467
F6XEL1	Uncharacterized protein	22.335	4	4	197	23.1	6	0.912	0.97	1.004	0.962	1.056	0.958	1.013	1.009	1.067	0.978	1.043	1.02933	1.04886	0.295212	1.02015	0.628562	1.06999	0.149378
E2RRR1	Uncharacterized protein	22.3278	7	7	421	46.7	8.51	0.964	0.991	0.947	0.967333	1.072	0.993	1.02	1.02833	1.042	0.975	0.996	1.00433	1.06306	0.0826635	0.976661	0.475051	1.03825	0.191553
J9P6W4	Serine/threonine-protein phosphatase	22.2951	6	5	305	35	5.54	1.066	1.012	0.96	1.01267	1.063	1.002	0.994	1.01967	0.966	0.992	0.945	0.967667	1.00691	0.861249	0.949003	0.112882	0.955563	0.250147
[truncated: 3,788 more rows]
