# Supplementary material for: Tandem mass tag-based quantitative proteomic analysis of lycorine treatment in highly pathogenic avian influenza H5N1 virus infection
Source: PeerJ. 2019 Oct 2;7:e7697. doi: 10.7717/peerj.7697 (PMC6778435; doi:10.7717/peerj.7697)
Supplement: Table S2 — 340 cellular proteins were differentially expressed proteins as shown by MaxQuant in the V/M group, including 123 up-regulated (>1.2-fold) and 217 down-regulated (to <0.833-fold) proteins. [file peerj-07-7697-s006.xlsx]

## Sheet: V-M up-regulated-123
Supplementary material tables S2: 340 cellular proteins were differentially expressed proteins as shown by MaxQuant in the V/M group, including 123 up-regulated (>1.2-fold) and 217 down-regulated (to <0.833-fold) proteins.
M	Description	Coverage	Peptides	Unique Peptides	AAs	MW [kDa]	calc. pI	M1-126	M2-127N	M3-127C	Average M	V1-128N	V2-128C	V3-129N	Average V	L1-129C	L2-130N	L3-130C	Average L	Ratio V/M	P Value V/M
F6UMP8	Uncharacterized protein	1.48548	1	1	1481	166.2	6.65	0.093	0.079	0.144	0.105333	1.946	2.141	2.543	2.21	0.701	0.527	0.826	0.684667	20.981	0.000285633
E2R575	Uncharacterized protein	4	1	1	375	43.3	8.88	0.205	0.215	0.218	0.212667	1.706	2.027	2.08	1.93767	0.851	0.737	0.96	0.849333	9.11129	0.000122787
Q2KM15	2'-5' oligoadenylate synthetase-like 1	1.35922	1	1	515	59.8	7.24	0.226	0.192	0.277	0.231667	2.24	2.069	1.921	2.07667	0.666	0.675	0.735	0.692	8.96403	4.21707e-05
F6Y625	Phosphodiesterase	0.886918	1	1	902	100.8	5.76	0.351	0.419	0.353	0.374333	1.991	2.13	1.918	2.013	0.687	0.568	0.584	0.613	5.37756	1.56875e-05
H9GX26	Uncharacterized protein	2.38095	1	1	252	28.1	7.99	0.328	0.392	0.341	0.353667	1.823	1.895	1.945	1.88767	0.794	0.723	0.759	0.758667	5.33742	2.88399e-06
E2RL19	Uncharacterized protein	23.6607	5	5	224	25.5	9.58	0.469	0.472	0.472	0.471	1.525	1.8	1.917	1.74733	0.752	0.791	0.802	0.781667	3.70984	0.000390236
F1PBJ2	Uncharacterized protein	23.1644	22	21	967	112.3	6.99	0.528	0.528	0.564	0.54	1.808	1.745	1.797	1.78333	0.628	0.698	0.703	0.676333	3.30247	6.81147e-07
E2RDI7	Uncharacterized protein	6.81004	1	1	279	31.8	9.8	0.535	0.518	0.584	0.545667	1.772	1.689	1.802	1.75433	0.682	0.695	0.722	0.699667	3.21503	6.56585e-06
F6Y190	Uncharacterized protein	9.28571	1	1	140	15.9	5.55	0.703	0.604	0.553	0.62	1.804	1.777	1.55	1.71033	0.73	0.657	0.622	0.669667	2.7586	0.00028771
F1PKP5	Uncharacterized protein	4.83871	2	2	496	54.9	7.09	0.607	0.66	0.604	0.623667	1.202	1.653	1.757	1.53733	0.855	0.824	0.838	0.839	2.46499	0.00595054
J9NYW1	Uncharacterized protein	10.2326	2	2	215	24.1	10.58	0.617	0.686	0.65	0.651	1.634	1.451	1.716	1.60033	0.769	0.74	0.736	0.748333	2.45827	0.000300558
E2RLH6	Uncharacterized protein	6.57895	1	1	152	16.7	7.58	0.526	0.546	0.679	0.583667	1.574	1.508	0.996	1.35933	0.827	1.049	1.296	1.05733	2.32895	0.0147693
L7N0E9	Ferritin	2.54237	1	1	236	26	8.34	0.731	0.726	0.561	0.672667	1.66	1.385	1.223	1.42267	0.959	0.943	0.812	0.904667	2.11497	0.00574434
F1PLT8	Sulfhydryl oxidase	6.87237	4	4	713	79.1	8.78	0.618	0.623	0.617	0.619333	1.377	1.441	1.045	1.28767	0.622	1.361	1.295	1.09267	2.07912	0.00552526
E2RJP3	Uncharacterized protein	3.81944	1	1	288	32.3	9.69	0.654	0.785	0.682	0.707	1.399	1.426	1.548	1.45767	0.841	0.885	0.78	0.835333	2.06176	0.00024605
J9NUC6	Uncharacterized protein	4.6875	1	1	192	20.4	10.67	0.663	0.742	0.725	0.71	1.532	1.513	1.332	1.459	0.894	0.783	0.816	0.831	2.05493	0.000388545
F1Q1K9	Uncharacterized protein	1.25224	1	1	559	62.5	6.98	0.665	0.539	0.555	0.586333	1.419	1.183	0.933	1.17833	0.566	1.546	1.594	1.23533	2.00966	0.0153433
Q53VB8	Ferritin light chain	63.4286	8	7	175	20.1	6	0.64	0.701	0.728	0.689667	1.435	1.522	1.195	1.384	0.985	0.916	0.877	0.926	2.00677	0.00236173
F1PUM6	Uncharacterized protein	4.89362	2	2	470	53.7	5.15	0.682	0.754	0.5	0.645333	1.027	1.382	1.476	1.295	0.551	1.18	1.449	1.06	2.00671	0.0141606
F1PNS2	Uncharacterized protein	4.65116	1	1	344	39.1	9.16	0.769	0.744	0.664	0.725667	1.386	1.342	1.544	1.424	0.802	0.919	0.831	0.850667	1.96233	0.00053715
F1Q421	Plasminogen	2.0936	2	1	812	91.1	7.08	0.647	0.646	0.622	0.638333	1.581	1.204	0.949	1.24467	0.514	1.308	1.53	1.11733	1.94987	0.0299418
J9NUW1	Uncharacterized protein	5.02513	1	1	199	20.9	11.25	0.846	0.746	0.679	0.757	1.445	1.514	1.426	1.46167	0.842	0.749	0.752	0.781	1.93087	0.000220067
J9P643	Globin B1	19.7279	3	3	147	16.1	8.65	0.655	0.67	0.681	0.668667	1.333	1.474	0.97	1.259	0.765	1.241	1.211	1.07233	1.88285	0.0171408
J9P2J3	Uncharacterized protein	9.41558	2	2	308	34.9	10.24	0.748	0.811	0.711	0.756667	1.499	1.167	1.511	1.39233	0.85	0.835	0.869	0.851333	1.84009	0.00547293
J9NWP2	Uncharacterized protein	27.3973	1	1	73	8.3	4.32	0.728	0.905	0.633	0.755333	1.592	1.024	1.432	1.34933	0.919	0.886	0.881	0.895333	1.78641	0.0336148
E2R9L3	Uncharacterized protein	0.726141	1	1	964	108.2	7.27	0.719	0.664	0.673	0.685333	1.358	1.222	0.935	1.17167	0.973	1.276	1.181	1.14333	1.70963	0.0180721
Q95MP7	Ferritin heavy chain	53.5519	8	8	183	21.3	5.88	0.685	0.688	0.815	0.729333	1.348	1.236	1.127	1.237	1.093	1.017	0.991	1.03367	1.69607	0.00272142
E2RQC7	Lipase maturation factor	3.5461	2	2	705	79.3	9.83	0.773	0.835	0.821	0.809667	1.416	1.36	1.275	1.35033	0.843	0.846	0.831	0.84	1.66776	0.000277108
F1P8J4	Uncharacterized protein	9.35252	1	1	139	15.2	9.13	0.686	0.834	0.879	0.799667	1.276	1.381	1.262	1.30633	0.863	0.908	0.909	0.893333	1.6336	0.00186626
J9NW75	Uncharacterized protein	22.833	9	9	473	52.8	7.06	0.773	0.832	0.793	0.799333	1.206	1.313	1.289	1.26933	0.922	0.933	0.94	0.931667	1.58799	0.000215525
F1PFI5	Uncharacterized protein	26.4463	7	7	242	27.3	6.24	0.835	0.845	0.792	0.824	1.427	1.238	1.237	1.30067	0.876	0.879	0.871	0.875333	1.57848	0.00186475
E2R9G5	Guanine nucleotide-binding protein subunit gamma	30.8824	2	1	68	7.3	7.85	0.726	0.945	0.832	0.834333	1.106	1.404	1.432	1.314	0.915	0.844	0.797	0.852	1.57491	0.01707
E2RPW4	Uncharacterized protein	9.62264	4	4	530	59.4	6.06	0.839	0.792	0.794	0.808333	1.128	1.344	1.301	1.25767	0.943	0.987	0.873	0.934333	1.55588	0.00268471
E2RSF7	Phosphoinositide phospholipase C	3.45269	1	1	782	88.8	7.34	0.762	0.817	1.009	0.862667	1.458	1.169	1.389	1.33867	0.784	0.798	0.814	0.798667	1.55178	0.0143389
E2QX30	Uncharacterized protein	1.30344	2	2	1918	220.2	7.56	0.768	0.969	0.864	0.867	1.329	1.536	1.171	1.34533	0.829	0.755	0.779	0.787667	1.55171	0.0165778
E2RA28	Uncharacterized protein	5.04087	3	3	734	84.7	6.47	0.844	0.886	0.876	0.868667	1.279	1.358	1.282	1.30633	0.805	0.839	0.831	0.825	1.50384	0.000109094
F1PBV5	Uncharacterized protein	7.92254	4	4	568	60.8	9.22	0.824	0.932	0.792	0.849333	1.209	1.341	1.197	1.249	0.915	0.904	0.888	0.902333	1.47057	0.00309304
J9NSF9	Prothrombin	4.99195	2	2	621	70.3	6	0.765	0.876	0.822	0.821	1.14	1.44	1.042	1.20733	0.75	1.173	0.993	0.972	1.47056	0.0356252
E2RGD2	Uncharacterized protein	2.41187	1	1	539	60.3	6.44	0.795	0.878	0.726	0.799667	1.068	1.304	1.155	1.17567	1.123	0.91	1.042	1.025	1.4702	0.0100247
F1PV45	Uncharacterized protein	0.0227402	1	1	35180	3904.6	6.35	0.791	0.757	0.756	0.768	1.224	1.177	0.924	1.10833	1.003	1.271	1.098	1.124	1.44314	0.0222449
E2RHZ0	Condensin complex subunit 1	30.1429	32	32	1400	157.2	6.61	0.837	0.868	0.86	0.855	1.263	1.138	1.236	1.21233	0.935	0.917	0.946	0.932667	1.41793	0.000795189
F1P7X4	Uncharacterized protein	11.6505	2	2	103	11.7	4.13	0.695	0.892	0.874	0.820333	1.008	1.236	1.229	1.15767	1.097	0.985	0.985	1.02233	1.41121	0.0260447
E2RHN5	Uncharacterized protein	0.562701	1	1	1244	140.3	7.03	0.795	0.764	0.73	0.763	1.185	1.127	0.899	1.07033	1.027	1.367	1.105	1.16633	1.4028	0.0262399
F1PQD5	Uncharacterized protein	0.619195	1	1	1615	159	7.88	0.831	0.758	0.832	0.807	1.052	1.263	1.076	1.13033	0.86	1.18	1.148	1.06267	1.40066	0.0104126
E2RLN4	Uncharacterized protein	13.1805	4	4	349	40	10.01	0.849	0.874	0.827	0.85	1.219	1.117	1.221	1.18567	0.969	0.978	0.946	0.964333	1.3949	0.00081198
E2R9W4	Uncharacterized protein	5.75758	1	1	330	37.8	7.53	0.824	0.884	0.793	0.833667	1.099	1.272	1.107	1.15933	1.084	0.953	0.983	1.00667	1.39064	0.00642726
F1Q4J5	Uncharacterized protein	4.02299	1	1	174	19.7	9.88	0.879	0.966	0.842	0.895667	1.287	1.2	1.229	1.23867	0.858	0.856	0.883	0.865667	1.38295	0.00156084
J9NZE9	Uncharacterized protein	12.2302	2	1	139	16.5	9.32	0.818	0.881	0.873	0.857333	1.07	1.246	1.234	1.18333	0.943	1.018	0.917	0.959333	1.38025	0.00561
J9NUD1	Uncharacterized protein	3.66599	2	1	491	50.3	9.26	0.895	0.994	0.791	0.893333	1.313	1.301	1.085	1.233	0.932	0.851	0.837	0.873333	1.38022	0.0228422
E2RLP0	Uncharacterized protein	46.2687	8	7	201	23	8.29	0.809	0.877	0.853	0.846333	1.126	1.169	1.208	1.16767	0.952	1.026	0.979	0.985667	1.37968	0.000485265
F1PPW5	Uncharacterized protein	3.85757	1	1	337	36.6	5.26	0.81	1.038	0.896	0.914667	1.35	1.093	1.332	1.25833	0.812	0.893	0.778	0.827667	1.37573	0.0317995
F6V493	Uncharacterized protein	10	1	1	140	15.9	10.2	0.827	0.74	0.916	0.827667	1.191	1.134	1.077	1.134	1.033	1.064	1.018	1.03833	1.37012	0.00717821
F1Q0Q9	Uncharacterized protein	27.9446	14	1	433	48.1	5.06	0.811	0.838	0.729	0.792667	1.134	1.059	1.043	1.07867	0.996	1.127	1.262	1.12833	1.36081	0.00268516
J9NRV2	Uncharacterized protein	1.2894	1	1	698	76.8	9.83	0.845	0.871	0.874	0.863333	1.257	1.017	1.239	1.171	0.943	0.958	0.995	0.965333	1.35637	0.0166982
Q7YR70	Angio-associated migratory cell protein	5.51724	2	2	435	46.9	4.39	0.985	1.016	0.895	0.965333	1.086	1.391	1.45	1.309	0.701	0.766	0.709	0.725333	1.35601	0.0440974
E2R9G2	mRNA-capping enzyme	7.20268	4	4	597	68.6	8.16	0.807	0.806	0.787	0.8	1.159	1.148	0.943	1.08333	1.058	1.182	1.11	1.11667	1.35417	0.0159082
E2RA59	Uncharacterized protein	2.86678	1	1	593	66.1	8.37	0.946	0.855	0.844	0.881667	1.201	1.321	1.023	1.18167	0.882	0.958	0.969	0.936333	1.34026	0.0314767
F1PXL3	Uncharacterized protein	28.125	2	2	128	14.9	9.82	0.801	0.92	0.867	0.862667	1.152	1.183	1.132	1.15567	0.999	0.954	0.992	0.981667	1.33964	0.00144547
F1Q1H3	Uncharacterized protein	31.746	5	5	189	21.7	5.4	0.904	0.862	0.846	0.870667	1.169	1.063	1.235	1.15567	1.014	0.944	0.963	0.973667	1.32734	0.00577841
J9P0C3	Uncharacterized protein	3.19905	2	2	844	91.9	6.51	0.871	0.936	0.847	0.884667	1.112	1.153	1.253	1.17267	0.935	0.917	0.976	0.942667	1.32555	0.00437709
E2RP20	Perilipin	40.9396	15	15	447	48.9	5.44	0.785	0.717	0.801	0.767667	1.082	0.999	0.968	1.01633	1.102	1.293	1.253	1.216	1.32393	0.0043212
F1Q2I2	Uncharacterized protein	2.53968	1	1	315	34.3	5.12	0.803	0.968	0.85	0.873667	1.143	1.132	1.158	1.14433	1.002	0.994	0.951	0.982333	1.30981	0.0055028
J9P061	Uncharacterized protein	34.2105	3	3	76	8.5	8.88	0.845	0.886	0.932	0.887667	1.199	1.204	1.081	1.16133	0.922	0.976	0.957	0.951667	1.3083	0.00446889
E2R4Y9	Uncharacterized protein	2.24719	2	1	623	69	7.61	0.845	0.914	0.818	0.859	1.239	1.1	1.019	1.11933	0.915	1.051	1.099	1.02167	1.30307	0.0207891
E2RM11	Uncharacterized protein	34.6062	12	12	419	50.1	5.1	0.894	0.904	0.885	0.894333	1.213	1.135	1.148	1.16533	0.971	0.913	0.937	0.940333	1.30302	0.000394761
F1Q0K3	Uncharacterized protein	0.595238	1	1	2016	225.7	5.62	0.984	0.846	0.83	0.886667	1.201	1.157	1.108	1.15533	0.944	1.03	0.9	0.958	1.30301	0.00854361
J9P4F0	Uncharacterized protein	17.7172	10	10	587	67	7.4	0.908	0.869	0.856	0.877667	1.258	0.975	1.189	1.14067	0.963	0.998	0.984	0.981667	1.29966	0.0385374
E2RN88	Uncharacterized protein	22.2222	9	6	504	55.6	6.35	0.938	0.848	0.928	0.904667	1.175	1.206	1.143	1.17467	0.935	0.914	0.913	0.920667	1.29845	0.00133015
E2RC52	Uncharacterized protein	25.1488	17	10	672	73.5	8.72	0.869	0.915	0.867	0.883667	1.168	1.14	1.133	1.147	0.965	0.941	1.001	0.969	1.298	0.000156355
J9NUW8	Translocation protein SEC62	10.0251	4	4	399	45.9	7.12	0.794	0.872	0.852	0.839333	1.076	1.138	1.045	1.08633	1.067	1.087	1.07	1.07467	1.29428	0.00235796
E2RKV1	Uncharacterized protein	0.895255	1	1	1117	122.1	9.89	0.756	0.816	0.887	0.819667	1.132	1.059	0.988	1.05967	1.014	1.167	1.18	1.12033	1.2928	0.0129671
F1P874	Uncharacterized protein	3.88601	3	0	772	86.5	8.7	0.906	0.866	0.919	0.897	1.044	1.121	1.3	1.155	0.932	1.005	0.907	0.948	1.28763	0.02912
E2RSV7	Nuclear pore complex protein Nup93	32.6486	29	29	925	104.1	6.79	0.931	0.882	0.898	0.903667	1.209	1.11	1.168	1.16233	0.926	0.931	0.944	0.933667	1.28624	0.00129382
F1PRM0	Uncharacterized protein	1.43541	2	2	1463	165	6.34	0.867	0.955	0.901	0.907667	1.161	1.225	1.113	1.16633	0.988	0.888	0.903	0.926333	1.28498	0.00332709
J9NYP8	Uncharacterized protein	2.45098	1	1	408	46	8.22	0.881	0.91	0.839	0.876667	1.234	1.077	1.046	1.119	0.87	1.073	1.07	1.00433	1.27643	0.0171689
E2QX15	Uncharacterized protein	11.0442	5	5	498	53.2	9.89	0.898	0.895	0.906	0.899667	1.2	1.159	1.075	1.14467	0.968	0.947	0.953	0.956	1.27232	0.00268016
B6F2G5	Fragile histidine triad	10.7383	1	1	149	17.1	6.73	0.893	0.887	0.901	0.893667	1.287	1.061	1.059	1.13567	0.957	0.973	0.981	0.970333	1.27079	0.0331035
F1PAK4	Transmembrane 9 superfamily member	12.0732	10	9	820	93.1	6.37	0.918	0.93	0.864	0.904	1.125	1.158	1.158	1.147	0.969	0.923	0.955	0.949	1.26881	0.000460774
F1P805	Uncharacterized protein	3.52304	1	1	369	40.4	6.52	0.869	0.86	0.96	0.896333	1.259	1.099	1.046	1.13467	0.93	1.103	0.872	0.968333	1.2659	0.0290739
E2R2J0	Uncharacterized protein	28.352	17	17	716	81	6.34	0.9	0.89	0.897	0.895667	1.173	1.108	1.118	1.133	0.936	1.001	0.976	0.971	1.26498	0.000313385
F1PV12	Uncharacterized protein	5.25164	3	3	457	50.3	6.8	0.944	0.957	0.866	0.922333	1.229	1.134	1.134	1.16567	0.952	0.887	0.897	0.912	1.26382	0.00462486
E2RAP9	Uncharacterized protein	2.21328	1	1	994	112.7	7.23	0.815	0.893	0.986	0.898	1.114	1.207	1.075	1.132	0.929	1.015	0.966	0.97	1.26058	0.0206357
F6XF58	Uncharacterized protein	5.61224	1	1	196	22.8	9.42	0.903	0.843	0.879	0.875	1.087	1.131	1.09	1.10267	1.001	1.068	0.998	1.02233	1.26019	0.00053528
F1PI47	Uncharacterized protein	11.6505	1	1	103	11.5	10.4	1.004	0.907	0.83	0.913667	1.161	1.089	1.201	1.15033	0.953	0.934	0.921	0.936	1.25903	0.0169579
E2R5W5	DNA polymerase	13.6405	12	12	1107	123.7	7.71	0.909	0.974	0.897	0.926667	1.164	1.207	1.125	1.16533	0.946	0.882	0.896	0.908	1.25755	0.00208864
E2QZE8	Uncharacterized protein	1.47059	1	1	408	45.3	5.35	0.877	0.815	0.82	0.837333	1.161	1.08	0.916	1.05233	0.898	1.252	1.182	1.11067	1.25677	0.0451986
F1PU32	Uncharacterized protein	10.2632	3	2	380	42.7	7.49	0.998	1.076	0.918	0.997333	1.175	1.334	1.246	1.25167	0.79	0.714	0.749	0.751	1.25501	0.0171508
F1PHJ0	Uncharacterized protein	5.43071	2	2	534	59.8	7.88	0.845	0.986	0.873	0.901333	1.121	1.18	1.089	1.13	0.966	1.045	0.895	0.968667	1.2537	0.010719
E2R1M8	Uncharacterized protein	8.20513	2	2	195	21.7	6.38	0.939	0.932	0.827	0.899333	1.002	1.228	1.142	1.124	1.024	0.932	0.975	0.977	1.24981	0.0403753
F6XHA7	Uncharacterized protein	29.7297	4	4	185	19.7	9.89	0.883	0.895	0.878	0.885333	1.056	1.107	1.154	1.10567	1.066	0.976	0.986	1.00933	1.24887	0.001557
E2RPS4	Uncharacterized protein	4.71014	1	1	276	28	9.91	0.862	0.987	0.892	0.913667	1.157	1.185	1.074	1.13867	1.016	0.98	0.847	0.947667	1.24626	0.0110488
F1PMZ0	Uncharacterized protein	4.31373	2	2	510	58.6	8.97	0.844	0.93	0.803	0.859	1.056	1.116	1.036	1.06933	1.002	1.117	1.095	1.07133	1.24486	0.00910983
F1P9T2	Uncharacterized protein	3.34129	1	1	419	48.1	9.5	0.822	0.92	0.924	0.888667	1.112	1.085	1.114	1.10367	0.969	1.038	1.015	1.00733	1.24194	0.0034279
E2QUH4	Uncharacterized protein	11.6564	2	2	163	19.6	10.01	1.002	0.95	0.904	0.952	1.163	1.293	1.079	1.17833	0.989	0.804	0.815	0.869333	1.23775	0.0296623
J9P3M4	Uncharacterized protein	10.7143	2	2	252	27.7	4.75	0.843	0.898	1.019	0.92	1.185	1.176	1.039	1.13333	0.934	0.97	0.935	0.946333	1.23188	0.0385089
J9P555	Uncharacterized protein	22.9167	1	1	48	5.7	11.27	0.952	0.953	0.857	0.920667	1.189	1.115	1.097	1.13367	0.899	1.004	0.935	0.946	1.23135	0.00742578
F6XCY4	Uncharacterized protein	19.5046	7	5	323	36.3	4.96	1.003	0.972	0.918	0.964333	1.143	1.231	1.188	1.18733	0.827	0.865	0.854	0.848667	1.23125	0.00328904
J9P876	Uncharacterized protein	11.7096	9	2	854	97.5	5.62	0.942	0.961	0.887	0.93	1.209	1.164	1.057	1.14333	0.957	0.92	0.903	0.926667	1.22939	0.0132006
E2RDI6	Uncharacterized protein	25	2	2	124	14.7	10.05	0.98	0.894	0.945	0.939667	1.229	1.091	1.143	1.15433	0.921	0.868	0.929	0.906	1.22845	0.0105526
E2R912	Uncharacterized protein	3.64807	1	1	466	51.3	5.38	0.965	0.833	0.882	0.893333	1.085	1.08	1.114	1.093	1.002	1.002	1.037	1.01367	1.22351	0.00750517
E2RLK1	Uncharacterized protein	4.67836	1	1	342	39.3	9.07	0.882	0.94	0.916	0.912667	1.132	1.161	1.043	1.112	0.943	1.026	0.958	0.975667	1.21841	0.00711142
J9P549	Cytochrome c oxidase subunit 7A2, mitochondrial	21.2963	2	2	108	12.2	8.03	0.905	0.87	0.818	0.864333	1.035	1.052	1.068	1.05167	0.963	1.242	1.049	1.08467	1.21674	0.00226931
E2QWP7	Uncharacterized protein	6.77966	1	1	177	20.7	9.61	0.966	0.923	0.837	0.908667	1.115	1.073	1.127	1.105	0.966	1.055	0.938	0.986333	1.21607	0.0089495
E2R7T9	Uncharacterized protein	14.3177	6	6	447	48.7	9.85	0.878	0.893	0.877	0.882667	1.049	1.15	1.02	1.073	0.996	1.068	1.071	1.045	1.21563	0.00871346
F1PJ50	Uncharacterized protein	24.5455	3	3	110	12.5	10.17	0.864	0.926	0.999	0.929667	1.154	1.178	1.049	1.127	0.927	0.933	0.969	0.943	1.21226	0.0238135
J9NZA0	Uncharacterized protein	23.4234	6	6	111	12.2	3.78	0.827	0.868	0.928	0.874333	0.993	1.077	1.109	1.05967	1.07	1.105	1.023	1.066	1.21197	0.0150145
J9P3S0	Uncharacterized protein	11.7647	1	1	85	9.6	12.48	0.809	0.945	0.944	0.899333	1.055	1.163	1.05	1.08933	1.011	1.013	1.009	1.011	1.21127	0.03111
E2RM30	Uncharacterized protein	32.3988	8	8	321	35.8	7.17	0.917	0.926	0.885	0.909333	1.099	1.1	1.105	1.10133	0.98	1.02	0.969	0.989667	1.21114	0.000107437
E2RMJ7	Uncharacterized protein	5	2	2	360	38.7	6.86	0.897	0.948	0.891	0.912	1.116	1.121	1.075	1.104	1.015	0.935	1.003	0.984333	1.21053	0.00116801
F1PCK9	Uncharacterized protein	1.80505	1	1	554	59.9	6.62	0.848	1.015	0.879	0.914	1.13	1.056	1.133	1.10633	1.003	0.868	1.068	0.979667	1.21043	0.0281406
J9P1V7	Uncharacterized protein	31.7308	2	2	104	11.5	8.79	0.835	0.984	0.91	0.909667	1.145	1.115	1.039	1.09967	0.976	0.988	1.008	0.990667	1.20887	0.0235435
E2R7S1	Calcium-transporting ATPase	14.918	13	4	1220	134.6	5.91	0.851	0.969	0.964	0.928	1.12	1.126	1.119	1.12167	0.892	0.967	0.993	0.950667	1.20869	0.00739213
Q5JZQ9	Ceroid-lipofuscinosis neuronal protein 5	9.14286	3	3	350	40.4	8.28	0.866	0.953	0.901	0.906667	1.16	1.122	1.003	1.095	1.014	0.972	1.009	0.998333	1.20772	0.0246192
F6UZQ0	Uncharacterized protein	11.33	3	3	406	44.1	7.03	0.945	0.948	0.937	0.943333	1.125	1.166	1.126	1.139	0.899	0.999	0.854	0.917333	1.20742	0.00014765
E2R185	Phosphatidate cytidylyltransferase	6.62021	3	3	574	64.6	9.04	0.907	0.94	0.895	0.914	1.063	1.194	1.053	1.10333	0.961	0.96	1.026	0.982333	1.20715	0.016178
E2RMT0	Uncharacterized protein	17.2727	2	2	220	24.4	7.42	0.905	0.995	0.855	0.918333	1.074	1.11	1.14	1.108	0.946	0.92	1.053	0.973	1.20653	0.0137238
E2RSH5	Uncharacterized protein	13.4969	2	2	163	18.8	4.26	0.92	0.979	0.864	0.921	1.099	1.166	1.066	1.11033	0.946	1.028	0.932	0.968667	1.20557	0.0129693
J9NWL3	Uncharacterized protein	53.4483	3	3	58	6.6	4.54	0.874	0.978	0.874	0.908667	1.064	1.138	1.081	1.09433	0.964	1.017	1.009	0.996667	1.20433	0.0108251
E2R1T2	Uncharacterized protein	7.08447	2	2	367	39.3	8.02	0.889	0.964	0.861	0.904667	1.145	1.14	0.98	1.08833	0.979	1.035	1.007	1.007	1.20302	0.0420529
F1PCV4	Uncharacterized protein	38.7755	3	3	147	16	4.86	0.822	0.846	0.868	0.845333	1.081	0.912	1.054	1.01567	1.145	1.09	1.182	1.139	1.2015	0.0345119
E2RJI1	Uncharacterized protein	3.22581	1	1	372	40.9	7.02	0.92	0.914	0.996	0.943333	1.103	1.127	1.17	1.13333	0.98	0.877	0.914	0.923667	1.20141	0.00445023
E2RSW5	Uncharacterized protein	5.22388	2	2	536	57.9	6.14	0.862	1.012	0.903	0.925667	1.069	1.127	1.138	1.11133	0.937	0.951	1.002	0.963333	1.20058	0.0200823
E2RBH4	Uncharacterized protein	17.1134	8	8	485	56	4.84	0.885	0.958	0.92	0.921	1.185	1.101	1.03	1.10533	0.976	0.973	0.974	0.974333	1.20014	0.0204166

## Sheet: V-M down-regulated-217
Supplementary material tables S2: 340 cellular proteins were differentially expressed proteins as shown by MaxQuant in the M/L group, including 123 up-regulated (>1.2-fold) and 217 down-regulated (to <0.833-fold) proteins.
m	Description	Coverage	Peptides	Unique Peptides	AAs	MW [kDa]	calc. pI	L1-126	L2-127N	L3-127C	Average L	M1-128N	M2-128C	M3-129N	Average M	H1-129C	H2-130N	H3-130C	Average H	Ratio M/L	P Value M/L
J9P2M0	Uncharacterized protein	67.3611	6	3	144	15.7	5.2	1.179	1.142	1.191	1.17067	0.963	0.848	0.9	0.903667	0.929	0.942	0.905	0.925333	0.771925	0.00183336
E2R9S7	Uncharacterized protein	64.128	47	47	906	100.1	6.29	1.179	1.165	1.199	1.181	0.972	0.993	0.935	0.966667	0.829	0.869	0.86	0.852667	0.818515	0.000398421
A0A077LQA5	Tubulin alpha chain	62.306	22	0	451	50.1	5.06	1.19	1.141	1.172	1.16767	0.871	0.763	0.952	0.862	1.031	0.945	0.935	0.970333	0.738224	0.00568473
J9P7X1	Histone H3	61.0294	9	1	136	15.4	11.27	1.182	1.225	1.289	1.232	0.843	0.89	0.886	0.873	0.898	0.905	0.882	0.895	0.708604	0.000483596
E2R6L9	Importin subunit alpha	54.4423	18	17	529	57.9	5.27	1.334	1.155	1.26	1.24967	0.949	0.972	0.906	0.942333	0.782	0.825	0.816	0.807667	0.754068	0.00517034
E2RHY7	Uncharacterized protein	52.8708	20	1	418	46.6	8.75	1.15	1.284	1.078	1.17067	0.91	0.976	0.956	0.947333	0.874	0.828	0.944	0.882	0.809226	0.024444
E2R7H9	Uncharacterized protein	50.1312	15	13	381	43.8	5.94	1.087	1.089	1.118	1.098	0.905	0.959	0.828	0.897333	0.913	1.081	1.021	1.005	0.817243	0.00695835
W8E7Z7	MHC class I antigen (Fragment)	49.7238	8	0	181	20.8	5.47	1.682	1.754	1.51	1.64867	0.787	0.806	0.684	0.759	0.551	0.621	0.605	0.592333	0.460372	0.000403804
E2RN45	Uncharacterized protein	49.4331	15	15	441	49.9	5.22	1.141	1.069	1.12	1.11	0.876	0.905	0.893	0.891333	0.994	0.977	1.026	0.999	0.803003	0.000680178
A0A140T8E6	Uncharacterized protein	49.0591	27	24	744	81.7	6.14	1.139	1.208	1.177	1.17467	0.892	0.955	0.931	0.926	0.925	0.87	0.903	0.899333	0.788309	0.000784743
E2R8P1	Ribonucleoside-diphosphate reductase	46.0859	28	28	792	90.2	6.8	1.198	1.153	1.141	1.164	0.872	0.954	0.923	0.916333	0.924	0.924	0.909	0.919	0.787228	0.00110677
B6V8E6	Catenin beta-1	44.0461	27	24	781	85.5	5.86	1.183	1.153	1.157	1.16433	0.951	0.935	0.925	0.937	0.866	0.907	0.921	0.898	0.804752	4.68553e-05
Q9XSS9	Ras-related rho protein (Fragment)	42.5532	2	1	47	5.3	8.51	1.493	1.393	1.395	1.427	0.562	0.527	0.477	0.522	1.136	1.031	0.986	1.051	0.365802	2.54264e-05
F1PDT8	WAP four-disulfide core domain protein 2	40.2878	3	3	139	14.6	5.74	1.633	1.245	1.556	1.478	0.929	0.777	0.743	0.816333	0.701	0.72	0.697	0.706	0.552323	0.00735773
A0MZ32	MHC class I antigen (Fragment)	39.8058	6	0	206	23.4	5.69	1.377	1.359	1.184	1.30667	0.879	1.029	0.931	0.946333	0.717	0.774	0.752	0.747667	0.724235	0.00888354
J9NU70	Uncharacterized protein	39.726	3	3	73	8.5	8.44	1.457	1.093	1.335	1.295	0.867	0.778	1.047	0.897333	0.781	0.844	0.797	0.807333	0.692921	0.040381
E2RPP2	Uncharacterized protein	38.3966	8	3	237	27.2	9.55	1.107	1.023	1.019	1.04967	0.779	0.84	0.97	0.863	1.11	1.001	1.15	1.087	0.822166	0.0418385
J9PAY8	DNA topoisomerase 2	38.2219	55	45	1541	175.8	8.82	1.121	1.079	1.138	1.11267	0.857	0.923	0.792	0.857333	0.936	1.081	1.073	1.03	0.770521	0.0035985
F1PZ90	Uncharacterized protein	38.0018	40	40	1121	123.4	7.75	1.104	1.032	1.037	1.05767	0.853	0.888	0.786	0.842333	1.035	1.148	1.117	1.1	0.796407	0.00472389
F1PUU1	Uncharacterized protein	37.092	11	11	337	38.8	9.57	1.11	0.981	1.143	1.078	0.866	0.87	0.924	0.886667	1.037	1.025	1.043	1.035	0.822511	0.0223466
E2RRF8	Uncharacterized protein	36.7089	6	6	237	25.3	9.72	1.204	1.258	1.3	1.254	1.05	0.988	1.034	1.024	0.722	0.714	0.73	0.722	0.816587	0.00233775
F1PP71	Uncharacterized protein	33.9934	9	9	303	32.7	8.05	1.163	1.146	1.152	1.15367	0.97	0.914	0.938	0.940667	0.902	0.895	0.921	0.906	0.815371	0.000231702
Q3HTT3	Osteopontin (Fragment)	33.8346	7	1	266	29.6	4.56	2.218	2.866	2.34	2.47467	0.316	0.323	0.305	0.314667	0.211	0.226	0.195	0.210667	0.127155	0.000407892
O46882	MHC class I DLA-88	32.41	8	0	361	40.4	6.2	1.303	1.391	1.224	1.306	0.876	0.996	0.868	0.913333	0.745	0.793	0.803	0.780333	0.699336	0.00348775
E2R161	Uncharacterized protein	32.107	7	1	299	33.3	4.65	1.762	2.04	2.169	1.99033	0.544	0.578	0.483	0.535	0.492	0.479	0.452	0.474333	0.268799	0.000294514
E2RS47	Uncharacterized protein	31.383	9	9	376	42.5	6.42	1.284	1.115	1.164	1.18767	0.831	0.696	0.962	0.829667	1.036	0.941	0.971	0.982667	0.698569	0.0175092
E2R9E3	Uncharacterized protein	31.0526	30	30	1140	126.9	5.26	1.171	1.121	1.148	1.14667	0.969	0.917	0.954	0.946667	0.92	0.901	0.899	0.906667	0.825581	0.000698241
O46880	MHC class I DLA-12	30.7263	7	0	358	39.8	6.37	1.244	1.433	1.3	1.32567	1.028	0.987	0.811	0.942	0.731	0.837	0.629	0.732333	0.710586	0.0116083
E2R3U9	Uncharacterized protein	30.6839	13	13	541	59.2	9.5	1.232	1.258	1.291	1.26033	0.911	0.944	0.844	0.899667	0.827	0.853	0.838	0.839333	0.713832	0.000447703
E2RST6	Uncharacterized protein	29.5547	6	6	247	27.5	8.28	1.218	1.198	1.319	1.245	0.861	0.853	0.838	0.850667	0.792	0.991	0.931	0.904667	0.683266	0.000489344
J9P357	Uncharacterized protein	29.0837	37	1	1255	136.8	5.78	1.473	1.302	1.309	1.36133	0.904	0.824	0.783	0.837	0.842	0.7	0.863	0.801667	0.614838	0.00137596
E2RFE6	Uncharacterized protein	28.8136	2	2	59	7	10.45	1.56	1.208	1.631	1.46633	0.837	0.728	0.912	0.825667	0.684	0.745	0.695	0.708	0.563083	0.010537
E2QYU2	Clusterin	28.1879	11	11	447	51.9	6.05	1.682	1.912	1.767	1.787	0.639	0.639	0.572	0.616667	0.611	0.6	0.578	0.596333	0.345085	7.82666e-05
F1PKR0	Uncharacterized protein	25.5892	6	6	297	32.3	7.11	1.137	1.011	1.236	1.128	0.957	0.866	0.881	0.901333	0.944	0.968	0.999	0.970333	0.799054	0.0330517
J9P2E5	Uncharacterized protein	25.4323	19	2	983	110.4	5.47	1.127	1.072	1.233	1.144	1.006	0.917	0.927	0.95	0.888	0.912	0.919	0.906333	0.83042	0.0242859
A0A0A0RDI7	Transferrin receptor protein 1	24.4156	18	18	770	86.5	6.3	1.147	1.216	1.177	1.18	0.907	1.02	0.914	0.947	0.808	0.903	0.908	0.873	0.802542	0.00501398
F6V9R9	Uncharacterized protein	24.2833	23	23	1186	134.9	6.95	1.198	1.138	1.251	1.19567	0.774	0.715	0.766	0.751667	1.045	1.031	1.081	1.05233	0.628659	0.000291577
F1PPG5	Integrin beta	22.8717	15	15	787	86.9	5.36	1.132	1.106	1.163	1.13367	0.888	0.826	0.877	0.863667	0.966	1.008	1.033	1.00233	0.761835	0.000431578
E2RB82	Signal transducer and activator of transcription	22.7273	13	13	770	88	6.3	1.269	1.332	1.235	1.27867	1.014	0.973	1.049	1.012	0.754	0.664	0.709	0.709	0.791449	0.00175605
E2QSB5	Uncharacterized protein	22.7129	4	4	317	34.7	9	1.31	1.219	1.263	1.264	0.777	0.91	0.961	0.882667	0.876	0.859	0.825	0.853333	0.698312	0.00330141
E2RNC2	Claudin	22.381	4	3	210	22.1	8.29	1.251	1.092	1.159	1.16733	0.975	1.024	0.905	0.968	0.809	0.987	0.798	0.864667	0.82924	0.0257864
J9NZ08	Uncharacterized protein	22.2222	3	3	99	10.7	11.43	1.208	1.125	1.189	1.174	0.913	0.9	0.953	0.922	0.907	0.914	0.891	0.904	0.785349	0.00106369
F1Q3A2	Transmembrane protease serine	20.8531	7	7	422	47.7	8.56	1.237	1.266	1.254	1.25233	0.883	1.031	0.872	0.928667	0.802	0.847	0.806	0.818333	0.741549	0.00338058
F1PR26	Uncharacterized protein	20.8285	17	17	869	97.1	6.06	1.305	1.249	1.231	1.26167	0.905	0.899	0.909	0.904333	0.826	0.844	0.831	0.833667	0.716777	9.13874e-05
F1PNL9	Uncharacterized protein	20.339	7	7	354	40.1	7.78	1.263	1.222	1.161	1.21533	1.029	1.038	0.95	1.00567	0.736	0.805	0.797	0.779333	0.827482	0.00675961
E2RLP1	Uncharacterized protein	20.1439	6	6	417	46.2	7.61	1.249	1.17	1.249	1.22267	0.959	0.91	0.927	0.932	0.857	0.788	0.89	0.845	0.762268	0.000634773
F1PGR0	Uncharacterized protein	19.8667	10	10	750	85	8.12	1.276	1.172	1.334	1.26067	0.979	0.825	0.905	0.903	0.823	0.857	0.829	0.836333	0.716288	0.00531488
F1P984	Uncharacterized protein	18.6508	3	3	252	28	8	1.604	1.715	1.6	1.63967	0.741	0.688	0.724	0.717667	0.695	0.596	0.638	0.643	0.437691	2.26988e-05
E2RJX3	Uncharacterized protein	18.0886	32	32	2438	270.5	9.48	1.165	1.189	1.151	1.16833	0.899	0.972	0.913	0.928	0.912	0.89	0.909	0.903667	0.794294	0.000651431
E2R0Z0	Uncharacterized protein	18.0784	10	10	791	88.6	5.12	1.455	1.555	1.451	1.487	0.785	0.806	0.818	0.803	0.77	0.665	0.695	0.71	0.540013	4.20998e-05
E2QXK6	Galectin	18.0282	6	6	355	39.6	8.94	1.383	1.422	1.26	1.355	0.624	0.615	0.737	0.658667	1.225	0.854	0.88	0.986333	0.486101	0.000372578
F1PB66	Tetraspanin	18.0258	3	3	233	25.2	5.11	1.484	1.277	1.245	1.33533	0.831	0.811	0.779	0.807	0.79	0.934	0.849	0.857667	0.604343	0.00229662
E2R5Z5	Transmembrane 9 superfamily member	17.9758	9	9	662	75.6	7.31	1.088	1.036	1.085	1.06967	0.861	0.812	0.862	0.845	1.084	1.087	1.085	1.08533	0.789966	0.000678544
E2R9L7	Clustered mitochondria protein homolog	17.2849	21	21	1348	150.7	6.06	1.42	1.34	1.313	1.35767	0.69	0.753	0.661	0.701333	0.947	0.942	0.934	0.941	0.516573	9.85328e-05
F6USB7	Uncharacterized protein	17.0492	5	5	305	33.6	9	1.185	1.209	1.142	1.17867	0.916	0.972	0.96	0.949333	0.883	0.879	0.854	0.872	0.80543	0.00090624
E2REZ9	Putative tRNA (cytidine(32)/guanosine(34)-2'-O)-methyltransferase	16.7173	3	3	329	36.1	5.43	1.196	1.275	1.146	1.20567	0.901	0.928	0.929	0.919333	0.856	0.877	0.891	0.874667	0.76251	0.00177209
F1PIT4	Tetraspanin	16.3866	4	4	238	25.6	7.33	1.149	1.233	1.17	1.184	0.88	0.978	0.988	0.948667	0.914	0.849	0.838	0.867	0.801239	0.00529304
J9NZ79	Uncharacterized protein	16.3366	2	2	202	21.9	4.5	1.747	1.94	1.723	1.80333	0.522	0.742	0.523	0.595667	0.793	0.515	0.495	0.601	0.330314	0.00027338
F1PML0	Kinesin-like protein	16.1826	14	13	964	110.3	8.35	1.102	1.116	1.17	1.12933	0.9	0.915	1.006	0.940333	0.955	0.903	0.934	0.930667	0.832645	0.00841638
E2QX73	Uncharacterized protein	16.1538	8	8	520	57.2	5.67	1.307	1.296	1.261	1.288	0.875	0.877	0.796	0.849333	0.843	0.859	0.887	0.863	0.65942	0.000128309
Q9N0Y3	Interferon-induced GTP-binding protein Mx1	15.3729	7	6	657	74.8	5.82	1.126	1.272	0.999	1.13233	0.813	0.836	0.807	0.818667	1.289	0.922	0.936	1.049	0.722991	0.0167873
J9NXR3	Uncharacterized protein	15.2812	9	9	818	89.1	7.11	1.264	1.209	1.138	1.20367	0.961	0.98	0.88	0.940333	0.835	0.848	0.886	0.856333	0.781224	0.00523553
E2RRM0	Uncharacterized protein	15.2381	10	10	735	83.9	5.24	1.068	1.011	1.14	1.073	0.9	0.849	0.886	0.878333	1.01	1.074	1.063	1.049	0.818577	0.00846182
E2RS77	Uncharacterized protein	15.1899	1	1	79	8.9	9.99	1.116	1.102	1.106	1.108	0.926	0.859	0.975	0.92	1.031	0.925	0.961	0.972333	0.830325	0.00515863
E2RKN3	Uncharacterized protein	15.1316	2	2	152	15.7	9.48	1.809	1.682	1.808	1.76633	0.797	0.635	0.831	0.754333	0.52	0.463	0.454	0.479	0.427062	0.000163135
F1PJN4	Uncharacterized protein	14.899	10	10	792	89.1	7.65	1.309	1.429	1.36	1.366	0.82	0.875	0.786	0.827	0.778	0.825	0.82	0.807667	0.605417	0.000241106
E2RLT4	Uncharacterized protein	14.6113	8	8	746	85.9	9.36	1.034	1.037	1.132	1.06767	0.898	0.854	0.804	0.852	1.082	1.084	1.075	1.08033	0.798002	0.00687566
E2RA09	Uncharacterized protein	13.7019	5	2	416	47.3	9.66	1.209	1.224	1.03	1.15433	0.938	0.915	0.944	0.932333	0.942	0.889	0.911	0.914	0.807681	0.0242936
F1PDJ5	Apolipoprotein A-I	13.5338	3	2	266	30.2	5.39	1.071	1.445	1.207	1.241	0.885	0.919	0.819	0.874333	0.848	1.019	0.787	0.884667	0.704539	0.0316738
F1PGS0	DNA-directed RNA polymerase subunit	13.5094	21	21	1969	217.1	7.43	1.15	1.174	1.119	1.14767	0.894	0.9	0.926	0.906667	0.967	0.91	0.961	0.946	0.790009	0.000209267
F1PAG7	Uncharacterized protein	13.1868	5	5	364	42.3	8.6	1.197	1.118	1.064	1.12633	0.965	0.876	0.965	0.935333	0.937	0.92	0.958	0.938333	0.830423	0.0172174
Q95KM5	Claudin-3	12.844	2	1	218	23.1	8.05	1.464	1.345	1.267	1.35867	0.87	1.064	0.947	0.960333	0.706	0.715	0.622	0.681	0.70682	0.00773143
J9PB33	Uncharacterized protein	12.6374	2	2	182	20.1	10.77	1.324	1.323	1.292	1.313	0.842	0.803	0.796	0.813667	0.877	0.83	0.913	0.873333	0.6197	9.50312e-06
E2RJH2	Uncharacterized protein	12.5356	3	3	351	39	5.54	1.204	1.025	1.163	1.13067	0.857	0.891	1.016	0.921333	0.962	0.938	0.944	0.948	0.814858	0.0448291
F1PLW6	Uncharacterized protein	12.2807	4	4	399	46.7	7.85	1.275	1.332	1.209	1.272	0.84	0.743	0.893	0.825333	1.02	0.815	0.873	0.902667	0.648847	0.00138461
E2QZH1	Tetraspanin	11.8519	3	3	270	30.6	6.51	1.204	1.175	1.144	1.17433	0.961	0.982	0.888	0.943667	0.886	0.903	0.858	0.882333	0.803576	0.00229026
E2RKD7	Uncharacterized protein	11.8207	7	7	736	82.8	7.43	1.199	1.08	1.084	1.121	0.913	0.88	0.953	0.915333	0.957	0.966	0.968	0.963667	0.816533	0.00976067
D2YYC0	Mothers against decapentaplegic homolog	11.7647	5	3	425	48.1	7.15	1.253	1.211	1.162	1.20867	0.788	0.909	0.859	0.852	0.984	0.922	0.912	0.939333	0.704909	0.00124408
F1PHH3	Uncharacterized protein	11.578	10	10	1071	118.4	6.98	1.233	1.155	1.193	1.19367	1.016	0.916	0.977	0.969667	0.829	0.839	0.842	0.836667	0.812343	0.0036811
F1PEH9	Uncharacterized protein	11.3433	5	3	670	74.4	8.02	1.234	1.285	1.283	1.26733	0.883	0.928	0.805	0.872	0.886	0.841	0.855	0.860667	0.688059	0.000566346
J9P147	Succinate dehydrogenase assembly factor 2, mitochondrial	11.1842	2	2	152	18.1	6.35	1.303	1.149	1.177	1.20967	0.985	1.012	0.923	0.973333	0.856	0.761	0.835	0.817333	0.804629	0.0120555
E2R2V6	Uncharacterized protein	11.0669	10	10	1256	140	6.04	1.609	1.668	1.536	1.60433	0.757	0.844	0.751	0.784	0.607	0.625	0.603	0.611667	0.488677	7.21256e-05
F1PCD8	Uncharacterized protein	10.7944	11	11	1649	181.8	4.94	1.131	1.223	1.156	1.17	0.874	0.981	0.955	0.936667	0.868	0.915	0.897	0.893333	0.80057	0.00528881
Q9N0W3	Occludin 1B	10.7143	5	5	560	63.4	6.33	1.189	1.204	1.101	1.16467	0.807	0.957	0.997	0.920333	0.912	0.912	0.921	0.915	0.790212	0.0209577
E2RT70	Syndecan	10.6452	2	2	310	32.7	4.72	1.685	1.547	1.392	1.54133	1.054	1.175	0.966	1.065	0.41	0.422	0.349	0.393667	0.69096	0.0102093
F1P8G1	Uncharacterized protein	10.5485	3	3	474	54.5	4.86	1.153	1.122	1.135	1.13667	0.879	0.936	0.88	0.898333	0.899	1	0.996	0.965	0.790323	0.000335443
Q9TSZ6	Dystroglycan	10.5381	7	7	892	97.1	8.56	1.273	1.247	1.188	1.236	0.951	0.905	0.965	0.940333	0.824	0.823	0.823	0.823333	0.760787	0.000674557
F1P9Z8	Uncharacterized protein	10.4539	6	5	727	83.5	6.77	1.184	1.255	1.249	1.22933	0.876	0.892	0.93	0.899333	0.865	0.865	0.885	0.871667	0.731562	0.000288683
E2RTK7	Uncharacterized protein	10.3594	4	4	473	54.8	5.26	1.372	1.359	1.278	1.33633	0.687	0.805	0.771	0.754333	0.992	0.857	0.88	0.909667	0.56448	0.000220266
E2RPF2	Uncharacterized protein	10.2975	4	4	437	49.1	9.85	1.068	1.135	1.069	1.09067	0.889	0.901	0.886	0.892	1.031	1.001	1.02	1.01733	0.817848	0.000929519
F1P9S5	Uncharacterized protein	10.0543	16	16	1840	204.9	6.19	1.257	1.315	1.193	1.255	0.834	0.922	0.84	0.865333	0.877	0.876	0.887	0.88	0.689509	0.000999082
F6Y4A3	Uncharacterized protein	10.0503	2	2	199	19.8	4.69	1.163	1.256	1.289	1.236	0.794	0.826	0.937	0.852333	0.997	0.847	0.892	0.912	0.68959	0.00261336
F1PJH5	Uncharacterized protein	9.44993	5	5	709	80.9	5.57	1.083	1.131	1.2	1.138	0.899	0.902	0.88	0.893667	0.942	0.963	1	0.968333	0.785296	0.00213215
E2RRH5	Uncharacterized protein	9.42408	1	1	191	21.8	4.78	1.19	1.192	1.219	1.20033	1.05	0.79	1.021	0.953667	0.853	0.881	0.803	0.845667	0.794502	0.0407624
E2RST7	Uncharacterized protein	9.23567	2	2	314	34.7	7.87	1.275	1.125	1.205	1.20167	0.863	0.879	0.899	0.880333	0.879	0.958	0.917	0.918	0.732594	0.00196176
E2R0B9	Uncharacterized protein	9.21053	1	1	228	25.7	9.16	1.08	1.218	1.427	1.24167	0.969	0.97	0.896	0.945	0.749	0.817	0.874	0.813333	0.761074	0.0460195
A0A140DDC9	Baculoviral IAP repeat containing 5	9.15493	2	2	142	16.3	5.41	1.125	1.127	1.17	1.14067	0.973	0.983	0.892	0.949333	0.917	0.862	0.949	0.909333	0.832262	0.00408514
F1P918	Uncharacterized protein	9.06863	3	3	408	46.2	6.76	1.126	1.224	1.027	1.12567	0.86	0.992	0.841	0.897667	1.035	0.914	0.982	0.977	0.797453	0.0370229
F1PRQ8	Uncharacterized protein	9.01722	6	5	987	108.4	6.87	1.181	1.301	1.198	1.22667	0.931	0.944	0.945	0.94	0.873	0.826	0.799	0.832667	0.766304	0.00161477
J9NTG5	Uncharacterized protein	9	1	1	100	11.5	9.7	1.363	1.569	1.203	1.37833	0.742	0.988	0.911	0.880333	0.794	0.669	0.761	0.741333	0.638694	0.0178877
E2QXS6	Uncharacterized protein	8.61678	3	3	441	49.1	6.04	1.19	1.212	1.282	1.228	0.937	0.869	1	0.935333	0.868	0.797	0.844	0.836333	0.761672	0.0033621
F1PFX4	Uncharacterized protein	8.53659	2	2	246	29.2	8.41	1.074	1.218	1.082	1.12467	0.826	0.965	0.895	0.895333	1.022	0.972	0.946	0.98	0.796088	0.0204104
F1P9V1	Frizzled-6	8.28652	4	4	712	80.2	8.13	1.502	1.432	1.47	1.468	0.813	0.78	0.893	0.828667	0.66	0.753	0.699	0.704	0.564487	8.25162e-05
F1PNR7	Tubby-like protein	8.22511	3	3	462	51.9	6.2	1.22	1.315	1.115	1.21667	0.897	0.936	0.968	0.933667	0.907	0.768	0.874	0.849667	0.767397	0.00990546
E2R0R3	Uncharacterized protein	8.13333	3	3	750	85.1	8.72	1.324	1.308	1.376	1.336	0.827	0.83	0.923	0.86	0.765	0.881	0.766	0.804	0.643713	0.000224371
E2REI7	Uncharacterized protein (Fragment)	8.13309	3	3	541	60.3	5.21	1.14	1.105	1.291	1.17867	0.911	0.898	0.896	0.901667	0.866	0.952	0.94	0.919333	0.764989	0.00841564
F1PQ47	Uncharacterized protein	8.11881	3	3	505	56.3	6.52	1.188	1.178	1.216	1.194	0.952	0.965	1.007	0.974667	0.87	0.785	0.839	0.831333	0.816304	0.000401966
J9P580	Uncharacterized protein	8.03571	1	1	112	13.1	10.07	1.384	1.306	1.295	1.32833	0.818	0.912	1.02	0.916667	0.804	0.741	0.721	0.755333	0.690088	0.00313406
E2RN10	Beta-2-microglobulin	8	1	1	125	14.3	6.37	1.373	1.326	1.398	1.36567	0.985	0.944	0.808	0.912333	0.684	0.777	0.704	0.721667	0.66805	0.00139994
F1PGZ1	Uncharacterized protein	7.75194	2	2	258	30	8.88	1.208	1.074	1.118	1.13333	0.795	0.841	0.918	0.851333	0.991	0.983	1.071	1.015	0.751176	0.00613157
E2RNK0	Uncharacterized protein	7.67736	6	6	1029	116.9	6.01	1.081	1.233	1.047	1.12033	0.868	0.882	0.962	0.904	1.062	0.934	0.932	0.976	0.806903	0.0281102
E2RHB9	Uncharacterized protein	7.50436	3	3	573	63.9	8.81	1.34	1.307	1.382	1.343	0.89	0.864	0.842	0.865333	0.812	0.78	0.783	0.791667	0.644329	4.97609e-05
E2RF90	Uncharacterized protein	7.40741	2	2	297	33.5	7.21	1.887	1.895	1.806	1.86267	0.614	0.644	0.515	0.591	0.557	0.527	0.554	0.546	0.317287	1.23066e-05
P47240	Paired box protein Pax-8	7.18954	2	2	459	48.8	7.84	1.311	1.334	1.34	1.32833	0.87	0.892	0.931	0.897667	0.825	0.72	0.778	0.774333	0.675784	2.69963e-05
E2R6R3	Uncharacterized protein	7.16724	2	2	293	35.2	7.23	1.369	1.471	1.352	1.39733	0.808	0.821	0.924	0.851	0.802	0.679	0.775	0.752	0.609017	0.000471764
E2R3P5	Uncharacterized protein	6.96517	1	1	201	22.3	4.56	1.339	1.36	1.36	1.353	0.896	1.024	0.94	0.953333	0.733	0.662	0.686	0.693667	0.704607	0.000471355
F1PLP3	Tetraspanin	6.84932	2	1	292	32.6	7.66	1.315	1.335	1.123	1.25767	0.786	1.037	0.924	0.915667	0.843	0.808	0.828	0.826333	0.728068	0.0260867
E2R1C9	Uncharacterized protein	6.83761	3	1	351	39.5	5.5	1.171	1.246	1.248	1.22167	0.873	1.05	0.639	0.854	0.965	1.017	0.792	0.924667	0.699045	0.0391143
E2QX58	Uncharacterized protein	6.29371	4	4	715	76.4	8.15	1.321	1.364	1.248	1.311	0.896	0.887	0.75	0.844333	0.799	0.836	0.899	0.844667	0.644038	0.00130546
E2RIY8	Uncharacterized protein	6.17647	2	2	340	36.6	6.81	1.068	1.047	1.067	1.06067	0.856	0.952	0.781	0.863	1.007	1.074	1.147	1.076	0.813639	0.0167241
E2R1P7	Uncharacterized protein	6.09481	2	2	443	50.2	6.4	1.824	1.714	1.624	1.72067	0.664	0.643	0.726	0.677667	0.634	0.584	0.588	0.602	0.39384	7.7816e-05
E2QUH0	Uncharacterized protein	6.06061	1	1	99	10.8	5.29	1.358	1.492	1.2	1.35	0.821	0.975	1.081	0.959	0.759	0.599	0.716	0.691333	0.71037	0.0259721
J9P8M2	Fibronectin	5.93972	9	1	2256	249	6.14	1.244	1.805	1.593	1.54733	0.749	0.814	0.977	0.846667	0.854	0.574	0.39	0.606	0.547178	0.0167135
E2RL54	Uncharacterized protein	5.6338	1	1	142	15.9	5.21	1.228	1.276	1.27	1.258	0.797	0.989	0.831	0.872333	0.893	0.83	0.887	0.87	0.693429	0.00321195
F1P6H7	Fibronectin	5.60594	10	2	2426	267.1	5.55	1.683	1.777	1.527	1.66233	0.63	0.826	0.702	0.719333	0.633	0.598	0.624	0.618333	0.432725	0.000525751
J9NWC7	Uncharacterized protein	5.47445	2	2	274	31.6	7.27	1.075	1.092	1.082	1.083	0.905	0.857	0.931	0.897667	1.035	0.969	1.055	1.01967	0.82887	0.00113095
F1PCC8	Uncharacterized protein	5.3528	1	1	411	45.2	6.09	1.123	1.369	1.109	1.20033	0.756	0.796	0.881	0.811	1.117	0.933	0.916	0.988667	0.675646	0.0134108
F6XHY4	Uncharacterized protein	5.33563	6	3	1162	124.2	6.79	1.236	1.123	1.173	1.17733	0.846	0.812	0.905	0.854333	0.954	0.961	0.99	0.968333	0.725651	0.00160936
E2RT57	Uncharacterized protein	5.26811	6	3	1063	114	7.08	1.069	1.116	1.081	1.08867	0.848	0.968	0.85	0.888667	1.025	1.016	1.027	1.02267	0.816289	0.00896827
F1PW63	Uncharacterized protein	5.26316	2	2	380	43.8	9.17	1.228	1.291	1.132	1.217	0.921	1.06	0.949	0.976667	0.828	0.81	0.783	0.807	0.80252	0.0186247
E2QXI6	Uncharacterized protein	5	2	2	420	45.7	7.99	1.28	1.067	1.194	1.18033	0.988	0.823	0.931	0.914	0.877	0.932	0.908	0.905667	0.774358	0.0275026
E2RJF6	Uncharacterized protein	4.97238	2	2	362	41.4	9.29	1.271	1.363	1.255	1.29633	0.841	1.105	0.726	0.890667	0.844	0.781	0.814	0.813	0.687066	0.0257375
J9P1E8	Uncharacterized protein	4.96454	1	1	282	32.5	5.11	1.39	1.476	1.496	1.454	0.875	0.89	0.877	0.880667	0.68	0.668	0.649	0.665667	0.605685	6.33103e-05
J9P0Q4	Serine/threonine-protein kinase PLK	4.9505	3	3	606	68.4	8.97	1.372	1.314	1.238	1.308	0.803	0.899	0.749	0.817	0.802	0.918	0.905	0.875	0.624618	0.00110699
Q8MKI8	DNA repair protein RAD51 homolog 1	4.71976	1	1	339	36.9	5.6	1.213	1.242	1.368	1.27433	0.91	0.982	0.999	0.963667	0.719	0.772	0.795	0.762	0.756212	0.0047881
E2RSQ7	Uncharacterized protein	4.71464	2	2	403	44.4	4.7	1.167	1.237	1.099	1.16767	0.928	1.049	0.91	0.962333	0.907	0.838	0.865	0.87	0.824151	0.0254722
F1PHK9	Uncharacterized protein	4.70746	5	5	1487	164.5	5.15	1.187	1.244	1.261	1.23067	0.822	0.92	0.911	0.884333	0.894	0.857	0.903	0.884667	0.718581	0.000841715
E2RGY5	Uncharacterized protein	4.56853	1	1	197	22.3	5.5	1.27	1.201	1.092	1.18767	1.021	0.953	0.994	0.989333	0.882	0.741	0.846	0.823	0.833006	0.0232444
F1PKV5	Uncharacterized protein	4.56245	6	5	1337	150.6	8.7	1.211	1.215	1.042	1.156	0.929	0.976	0.937	0.947333	0.857	0.883	0.949	0.896333	0.819493	0.0238656
E2RCS6	Uncharacterized protein	4.51389	1	1	288	32.3	9.72	1.16	1.333	1.246	1.24633	0.998	1.004	0.855	0.952333	0.779	0.807	0.819	0.801667	0.764108	0.0135335
F1PM26	Uncharacterized protein	4.49827	4	4	1445	162.1	5.74	1.301	1.424	1.355	1.36	0.915	0.947	0.902	0.921333	0.762	0.663	0.732	0.719	0.677451	0.000322381
F1P8T3	Uncharacterized protein	4.45633	2	2	561	63.6	6.76	1.374	1.241	1.463	1.35933	1.144	1.109	1.017	1.09	0.469	0.628	0.555	0.550667	0.801864	0.0227442
F1PP65	Uncharacterized protein	4.41989	1	1	181	19.2	5.15	1.175	1.165	1.048	1.12933	0.842	1.001	0.962	0.935	0.959	0.949	0.899	0.935667	0.827922	0.0365164
E2RHF4	Uncharacterized protein	4.33437	1	1	323	36.7	8.98	1.231	1.219	1.062	1.17067	0.893	0.91	0.992	0.931667	0.967	0.814	0.911	0.897333	0.795843	0.018651
E2RBL9	Integrin beta	4.33168	4	4	808	88.3	5.48	1.347	1.338	1.235	1.30667	0.778	0.76	0.79	0.776	0.959	0.859	0.933	0.917	0.593878	0.000136879
B0LT39	SOX9 protein	4.2885	2	2	513	56.4	6.99	1.708	1.631	1.582	1.64033	0.7	0.619	0.666	0.661667	0.783	0.683	0.628	0.698	0.403373	2.32103e-05
E2QUQ6	Phosphate transporter	4.22125	2	2	687	74.6	7.59	1.166	1.215	1.416	1.26567	0.997	0.869	0.817	0.894333	0.81	0.827	0.883	0.84	0.70661	0.016419
E2RM24	Uncharacterized protein	4.18118	1	1	287	32	6.29	1.276	1.26	1.214	1.25	0.755	0.859	0.935	0.849667	0.809	0.9	0.992	0.900333	0.679733	0.0019429
F1PUI0	Uncharacterized protein	4.16198	3	3	889	95.6	9.06	1.279	1.205	1.141	1.20833	0.905	0.897	0.92	0.907333	0.954	0.873	0.826	0.884333	0.750897	0.00173984
E2QS16	Uncharacterized protein	4.06504	1	1	369	41.4	7.62	1.158	1.152	1.164	1.158	0.911	0.849	0.921	0.893667	1.015	0.943	0.888	0.948667	0.771733	0.000315395
E2R5M1	Uncharacterized protein	4.03226	1	1	372	40.6	6.14	1.142	1.18	1.144	1.15533	0.93	0.745	0.871	0.848667	1.051	0.954	0.984	0.996333	0.734564	0.00539109
J9NXW4	GrpE protein homolog	3.91459	1	1	281	31	9.45	1.219	1.234	1.3	1.251	1.05	0.861	0.767	0.892667	0.833	0.828	0.909	0.856667	0.713562	0.0145453
J9NX65	Uncharacterized protein	3.90071	1	1	282	28.9	7.34	1.884	1.94	1.64	1.82133	0.566	0.729	0.761	0.685333	0.523	0.462	0.494	0.493	0.376281	0.000498231
F1PWI6	Uncharacterized protein	3.87324	3	3	852	97.6	9.35	1.341	1.188	1.187	1.23867	0.855	0.945	0.904	0.901333	0.827	0.867	0.885	0.859667	0.727664	0.00418881
E2RA06	Uncharacterized protein	3.73396	3	3	857	91.4	5.39	1.27	1.231	1.001	1.16733	0.896	0.957	0.916	0.923	0.825	0.985	0.921	0.910333	0.790691	0.0465411
J9NZU9	Uncharacterized protein	3.7234	1	1	188	22	5.86	1.235	1.302	1.17	1.23567	0.942	0.97	0.974	0.962	0.87	0.722	0.814	0.802	0.778527	0.00225978
E2QYW0	Uncharacterized protein	3.58744	3	2	669	75.8	4.93	1.144	1.311	1.271	1.242	0.841	0.793	0.832	0.822	0.975	0.957	0.878	0.936667	0.661836	0.00131941
J9P8M7	Uncharacterized protein	3.37838	1	1	296	32	8.31	1.118	1.192	1.092	1.134	0.849	0.913	0.977	0.913	0.942	0.947	0.971	0.953333	0.805115	0.00969018
E2RR15	Uncharacterized protein	3.31695	2	2	814	88.7	8.31	1.194	1.285	1.399	1.29267	0.935	0.778	0.888	0.867	0.882	0.784	0.855	0.840333	0.670707	0.00484179
E2QUV3	Uncharacterized protein	3.28767	1	1	365	39.2	5.31	1.431	1.68	1.404	1.505	0.618	0.566	1.165	0.783	0.513	1.015	0.608	0.712	0.520266	0.0266439
F1Q2Z6	Uncharacterized protein	3.27468	3	3	2046	216.5	6.37	1.193	1.488	1.255	1.312	0.879	1.092	0.812	0.927667	0.774	0.783	0.722	0.759667	0.707063	0.0355815
F1PMI7	Uncharacterized protein	3.26087	1	1	368	41.1	5.8	1.201	1.266	1.107	1.19133	0.868	0.986	0.892	0.915333	0.852	0.894	0.933	0.893	0.768327	0.00920567
F1PDP1	Uncharacterized protein	3.22581	3	3	1178	130.8	8.16	1.265	1.226	1.08	1.19033	0.889	0.994	0.939	0.940667	0.85	0.826	0.93	0.868667	0.790255	0.0174805
G1K2D8	Biglycan	2.95699	1	1	372	41.9	7.11	1.56	1.799	1.608	1.65567	0.817	0.71	0.691	0.739333	0.581	0.652	0.581	0.604667	0.446547	0.000380242
E2RKP5	Uncharacterized protein	2.8777	1	1	417	44.9	6.81	1.144	1.091	1.201	1.14533	0.925	0.886	0.954	0.921667	1.023	0.788	0.988	0.933	0.804715	0.00391976
F1PNT6	Tetraspanin	2.78884	1	1	251	27.9	6.27	1.244	1.357	1.107	1.236	0.953	0.882	1.038	0.957667	0.955	0.677	0.787	0.806333	0.774811	0.0308732
E2RRZ9	Uncharacterized protein	2.78884	1	1	251	27.9	9.61	1.096	0.958	0.94	0.998	0.786	0.847	0.787	0.806667	1.072	1.256	1.258	1.19533	0.808283	0.022888
J9NXB0	Uncharacterized protein	2.781	2	2	863	95.1	4.91	1.587	1.62	1.443	1.55	0.608	0.644	0.627	0.626333	0.905	0.779	0.787	0.823667	0.404086	7.54277e-05
J9P946	Uncharacterized protein	2.77778	1	1	252	28.1	8.41	1.307	1.254	1.189	1.25	0.912	0.849	1.013	0.924667	0.853	0.834	0.789	0.825333	0.739733	0.00518295
F1PPA1	Uncharacterized protein	2.7451	1	1	510	56	6.71	1.451	1.654	1.465	1.52333	0.812	0.934	0.771	0.839	0.601	0.644	0.667	0.637333	0.550766	0.00111317
E2RHN1	Uncharacterized protein	2.74443	1	1	583	61.9	7.15	1.401	1.296	1.477	1.39133	0.651	0.301	1.008	0.653333	1.181	0.899	0.785	0.955	0.469574	0.0248502
F1PEJ0	Uncharacterized protein	2.71739	1	1	368	42.3	9.36	1.949	1.936	1.912	1.93233	0.632	0.584	0.509	0.575	0.482	0.488	0.506	0.492	0.297568	3.43955e-06
F1PRF0	Uncharacterized protein	2.59259	1	1	270	29.3	9.38	1.408	1.483	1.007	1.29933	0.685	0.733	0.715	0.711	1.095	0.871	1.004	0.99	0.547204	0.0166234
E2R612	Uncharacterized protein	2.58964	1	1	502	55.2	5.02	2.093	2.324	1.973	2.13	0.563	0.374	0.371	0.436	0.431	0.446	0.426	0.434333	0.204695	0.000151032
E2R480	Uncharacterized protein	2.5729	1	1	583	64.2	8.44	1.502	1.354	1.314	1.39	0.871	0.819	1.077	0.922333	0.581	0.783	0.699	0.687667	0.663549	0.00862008
J9NYY2	Uncharacterized protein	2.45098	1	1	408	45.9	9.51	1.172	0.902	1.124	1.066	0.711	0.756	0.765	0.744	1.071	1.281	1.218	1.19	0.697936	0.0191675
F6UY30	Uncharacterized protein	2.38501	1	1	587	67.6	9.25	1.119	1.143	1.073	1.11167	0.965	0.842	0.884	0.897	1.019	1.026	0.929	0.991333	0.806897	0.00665703
E9ABV4	Sulfotransferase (Fragment)	2.34987	1	1	383	45.1	9.54	1.266	1.137	1.081	1.16133	0.937	0.931	0.921	0.929667	0.926	0.881	0.92	0.909	0.800517	0.0135395
J9NRJ0	Uncharacterized protein	2.34785	6	6	4387	467.6	6.54	1.219	1.229	1.199	1.21567	0.805	0.892	0.958	0.885	0.87	0.926	0.903	0.899667	0.727996	0.00185347
F1PUQ8	Uncharacterized protein	2.34375	2	0	512	59.2	9.92	1.413	1.179	1.101	1.231	0.773	0.896	0.976	0.881667	0.825	1.04	0.798	0.887667	0.71622	0.0344068
F1PQ60	Uncharacterized protein	2.30415	1	1	651	71.7	7.3	1.198	1.538	1.123	1.28633	0.896	0.952	0.921	0.923	0.794	0.775	0.803	0.790667	0.717543	0.0476835
J9P6D6	Dual specificity protein phosphatase	2.28426	1	1	394	42.8	7.55	1.219	1.108	1.199	1.17533	0.573	0.492	0.575	0.546667	1.483	1.208	1.142	1.27767	0.465116	0.00013632
J9P8W6	Tetraspanin	2.24719	1	1	356	38.4	7.87	1.342	1.41	1.258	1.33667	0.938	0.982	0.797	0.905667	0.674	0.852	0.748	0.758	0.677556	0.00372646
F1PF24	Uncharacterized protein	2.21147	2	2	1447	159.1	7.24	1.21	1.17	1.17	1.18333	1.059	0.767	0.898	0.908	0.939	0.903	0.883	0.908333	0.767324	0.0322577
F1PCL9	Uncharacterized protein	2.17984	1	1	367	41.8	4.88	1.246	1.271	1.06	1.19233	1	0.927	0.945	0.957333	0.941	0.8	0.809	0.85	0.802907	0.0284903
E2RKJ3	Serine/threonine-protein kinase receptor	2.1322	1	1	469	52.8	7.83	1.48	1.309	1.38	1.38967	0.959	0.874	0.848	0.893667	0.777	0.701	0.672	0.716667	0.64308	0.00115828
E2QX93	Uncharacterized protein	2.11039	3	3	1232	132.9	5.06	1.291	1.364	1.157	1.27067	0.842	0.923	0.95	0.905	0.933	0.776	0.764	0.824333	0.712225	0.00601172
F1PU81	Tyrosine-protein phosphatase non-receptor type	2.10615	2	2	1187	134.8	8.37	1.154	1.294	1.105	1.18433	0.86	0.877	0.937	0.891333	0.909	0.927	0.936	0.924	0.752603	0.00875466
F6Y470	Uncharacterized protein	1.95228	1	1	461	51.2	7.52	1.448	1.293	1.303	1.348	0.879	0.843	0.819	0.847	0.808	0.86	0.745	0.804333	0.628338	0.000700117
E2RE93	Uncharacterized protein	1.88679	1	1	530	58	4.82	1.134	1.075	1.14	1.11633	0.784	0.949	0.914	0.882333	1.066	0.938	1	1.00133	0.790385	0.0125598
E2RDH4	Uncharacterized protein	1.88366	3	3	1805	193.7	6.87	1.129	1.16	1.055	1.11467	0.85	0.955	0.896	0.900333	1.071	0.958	0.925	0.984667	0.807715	0.00789821
E2QY53	Uncharacterized protein	1.66667	1	1	600	67.7	8.16	1.117	1.085	1.185	1.129	0.92	0.899	0.88	0.899667	0.996	0.899	1.02	0.971667	0.79687	0.00192935
J9PBE8	DNA polymerase epsilon subunit	1.64534	1	1	547	62	7.12	1.154	1.204	1.179	1.179	0.911	0.962	0.974	0.949	0.87	0.833	0.913	0.872	0.804919	0.000674411
E2RHG7	Kinesin-like protein	1.59574	1	1	752	84.6	7.46	1.062	1.141	1.036	1.07967	0.515	0.752	0.653	0.64	0.84	2.165	0.836	1.28033	0.592776	0.00435771
F1PUD6	Uncharacterized protein	1.59363	1	1	502	49.6	6.38	1.266	1.213	1.162	1.21367	0.935	0.95	0.921	0.935333	0.943	0.816	0.796	0.851667	0.770667	0.000869682
F1P603	Amyloid beta A4 protein	1.55844	1	1	770	86.9	4.82	1.283	1.312	1.205	1.26667	1.01	0.75	0.803	0.854333	0.88	0.837	0.92	0.879	0.674474	0.00851223
A0A1B1RVB2	Toll like receptor 8	1.54143	2	1	1038	118.8	6.71	1.161	1.628	1.352	1.38033	0.773	0.921	0.737	0.810333	0.839	0.887	0.702	0.809333	0.587056	0.0177907
F1PUF6	Retinoic acid receptor RXR-beta	1.49254	1	1	536	57.3	8.27	1.123	1.11	1.177	1.13667	0.956	0.812	0.991	0.919667	1.003	0.893	0.935	0.943667	0.809091	0.0206515
Q00589	Sodium- and chloride-dependent taurine transporter	1.45161	1	1	620	69.7	7.09	1.346	1.388	1.241	1.325	0.912	0.896	0.854	0.887333	0.777	0.81	0.777	0.788	0.669686	0.000740827
F1PK72	Uncharacterized protein	1.42857	1	1	560	64.1	6.48	1.153	1.221	1.222	1.19867	1.043	0.875	0.979	0.965667	0.883	0.823	0.801	0.835667	0.805617	0.0125122
F1PBM0	Uncharacterized protein	1.42259	2	2	1195	133.8	7.53	1.392	1.381	1.193	1.322	0.64	1.02	0.876	0.845333	0.803	0.835	0.86	0.832667	0.639435	0.0205148
E2RN73	Uncharacterized protein	1.41956	1	1	634	67.4	7.69	1.188	1.284	1.102	1.19133	1.019	1.052	0.902	0.991	0.878	0.779	0.795	0.817333	0.831841	0.0449524
F1PTL3	Uncharacterized protein	1.34529	2	1	1115	125.6	5.9	1.371	1.264	1.128	1.25433	0.885	0.864	1.006	0.918333	0.875	0.801	0.805	0.827	0.732129	0.0155485
J9P9X5	Suppressor of tumorigenicity 14 protein homolog	1.2926	1	1	851	94.4	7.09	1.378	1.442	1.277	1.36567	0.731	0.924	1.152	0.935667	0.892	0.609	0.594	0.698333	0.685135	0.0302938
E2R634	Uncharacterized protein	1.26002	1	1	873	94.3	6.28	1.17	1.167	1.232	1.18967	0.907	0.939	0.988	0.944667	0.872	0.906	0.819	0.865667	0.79406	0.00150539
J9P3A9	Uncharacterized protein	1.16732	1	1	1028	111.9	8.56	1.161	1.23	1.15	1.18033	0.903	1.031	0.947	0.960333	0.853	0.854	0.87	0.859	0.813612	0.00819009
J9NX78	Uncharacterized protein	1.01289	1	1	1086	124.2	6.73	1.256	0.992	1.223	1.157	0.778	0.797	0.756	0.777	1.019	1.037	1.143	1.06633	0.671564	0.0105789
F1PVC5	Uncharacterized protein	0.970874	1	1	1030	113.2	6.54	1.401	1.586	1.308	1.43167	0.952	0.879	0.943	0.924667	0.677	0.614	0.639	0.643333	0.645867	0.00394583
F1PS94	Uncharacterized protein	0.930797	2	2	2471	265.2	5.14	1.149	1.174	1.025	1.116	0.918	0.938	0.856	0.904	1.009	0.956	0.976	0.980333	0.810036	0.0153965
J9P1Y8	Uncharacterized protein	0.886263	1	1	677	76.8	9.41	1.168	1.153	1.092	1.13767	0.973	0.92	0.896	0.929667	0.934	0.945	0.918	0.932333	0.81717	0.00306796
F1P9X5	Uncharacterized protein	0.834327	1	1	839	92.8	7.83	1.573	1.745	1.386	1.568	0.646	0.99	0.668	0.768	0.774	0.649	0.571	0.664667	0.489796	0.00624285
E2RJ95	Uncharacterized protein	0.804505	1	1	1243	138.5	6.47	1.254	1.293	1.191	1.246	0.92	0.925	0.916	0.920333	0.894	0.795	0.813	0.834	0.73863	0.000399681
E2QWM0	Uncharacterized protein	0.773861	1	1	1163	131.8	10.18	1.152	1.211	0.942	1.10167	0.673	0.854	0.866	0.797667	1.126	1.068	1.107	1.10033	0.724054	0.0416299
Q38JA7	Lysine-specific demethylase 5C	0.706941	1	1	1556	175	5.58	1.124	1.22	1.136	1.16	0.945	0.895	0.949	0.929667	0.867	0.92	0.945	0.910667	0.801437	0.00271334
F1PK08	Uncharacterized protein	0.614754	1	1	1464	159.1	7.03	1.215	1.097	1.159	1.157	0.805	0.951	0.93	0.895333	0.985	0.923	0.937	0.948333	0.77384	0.0100433
E2R9Z6	Uncharacterized protein	0.429799	1	1	1396	159.5	6.79	1.25	1.138	0.973	1.12033	0.858	0.869	0.928	0.885	0.961	1.065	0.957	0.994333	0.789943	0.0476342
F1PR20	Uncharacterized protein	0.360469	1	1	3329	370.9	7.08	1.139	1.346	1.372	1.28567	0.881	0.949	0.784	0.871333	0.877	0.915	0.736	0.842667	0.677729	0.0092141
